# Supplementary material
Source: publisher figshare collection journal article supplement (https://frontiersin.figshare.com/ndownloader/files/21787845)

## Supplementary Material

### First large-scale Eastern Mediterranean and Black Seas stock assessment reveals total collapse of marine fisheries

Nazli Demirel, Mustafa Zengin, Aylin Ulman

Here we present, all outputs of CMSY stock assessment analysis for 54 stocks from Black, Marmara and Levantine Seas. Each stocks represented with graphs in two pages.

**In the first page:** Assessments for respective stock (top left) in the respective sea (bottom left). **Panel A** shows in black the time series of catches and in blue the three-years moving average with indication of highest and lowest catch, as used in the estimation of prior biomass by the default rules. **Panel B** shows the explored  $r$ - $k$  log space and in dark grey the  $r$ - $k$  pairs which were found by the CMSY model to be compatible with the catches and the prior information. **Panel C** shows the most probable  $r$ - $k$  pair and its approximate 95% confidence limits in blue. The black dots are possible  $r$ - $k$  pairs found by the BSM model, with a red cross indicating the most probable  $r$ - $k$  pair and its 95% confidence limits. **Panel D** shows in blue the biomass trajectory estimated by CMSY, scaled to the BSM estimate of  $B_{msy} = 0.5 k$ , and. Dotted lines indicate the 2.5<sup>th</sup> and 97.5<sup>th</sup> percentiles. Vertical blue lines indicate the prior biomass ranges. **Panel E** shows in blue the corresponding harvest rate from CMSY, scaled to the  $r/2$  estimate of BSM, and. **Panel F** shows the Schaefer equilibrium curve of catch/MSY relative to  $B/k$ , here indented at  $B/k < 0.25$  to account for reduced recruitment at low stock sizes, the curve shows predictions by CMSY, from first year (square) to last years (triangle).

**In the second page:** The graphs meant to inform management. The upper left panel shows catches relative to the BSM estimate of MSY, with indication of 95% confidence limits in grey. The upper right panel shows the development of relative total biomass ( $B/B_{msy}$ ), with the grey area indicating uncertainty. The lower left graph shows relative exploitation ( $F/F_{msy}$ ), with  $F_{msy}$  corrected for reduced recruitment below  $0.5 B_{msy}$ . The lower-right panel shows the trajectory of relative stock size ( $B/B_{msy}$ ) over relative exploitation ( $F/F_{msy}$ ).

**A: Catch Anchovy\_BS**

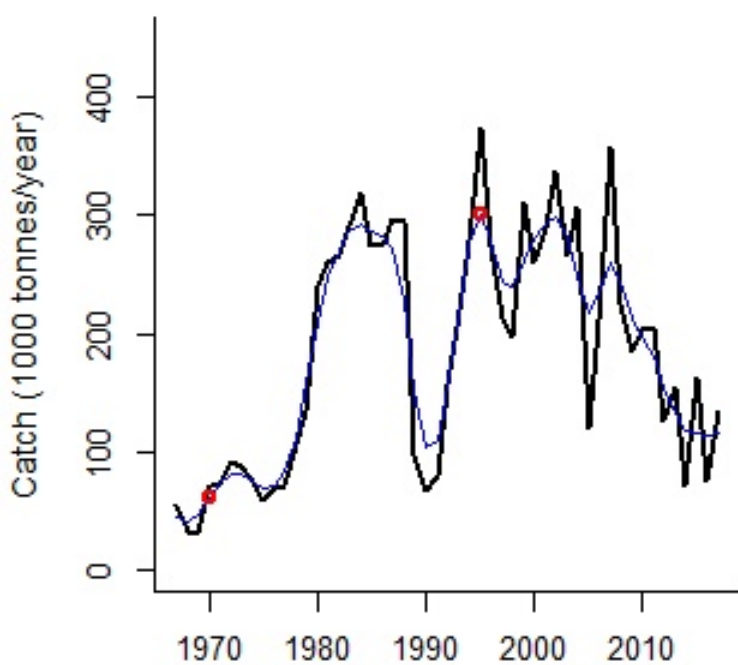

**B: Finding viable r-k**

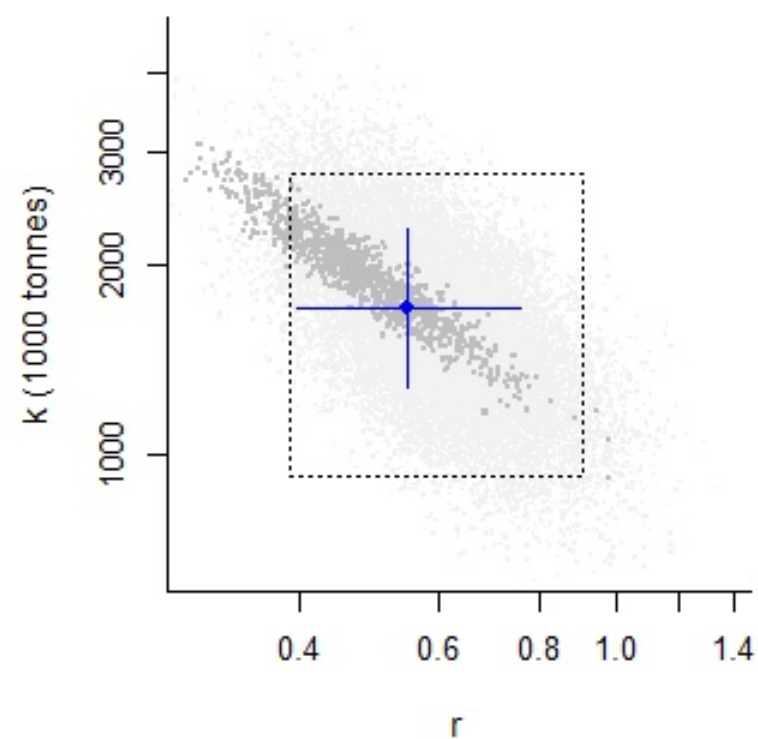

**C: Analysis of viable r-k**

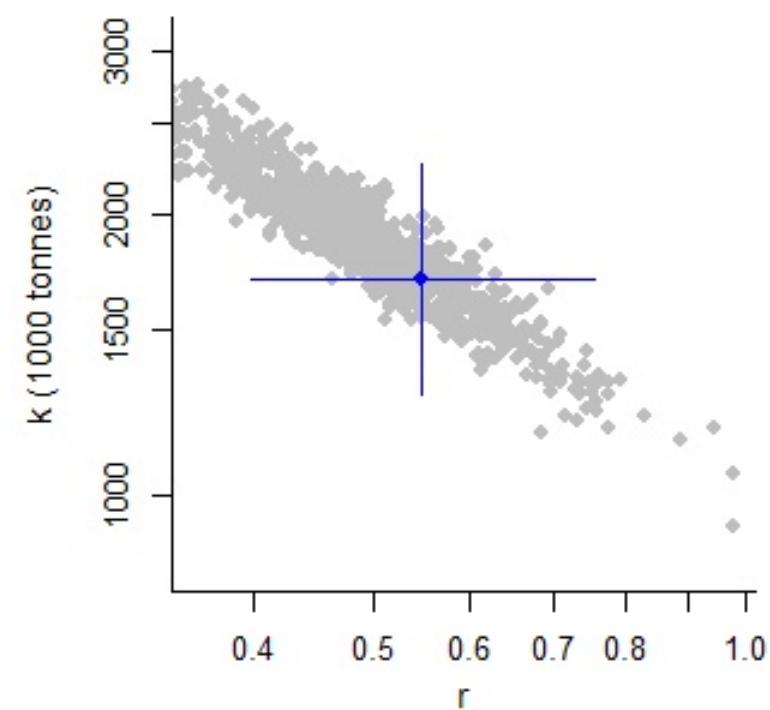

**D: Stock size**

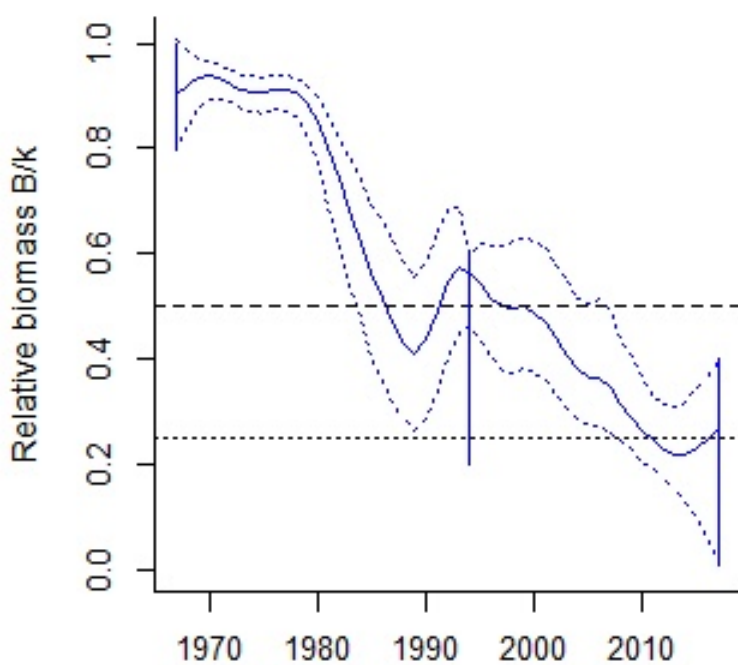

**E: Exploitation rate**

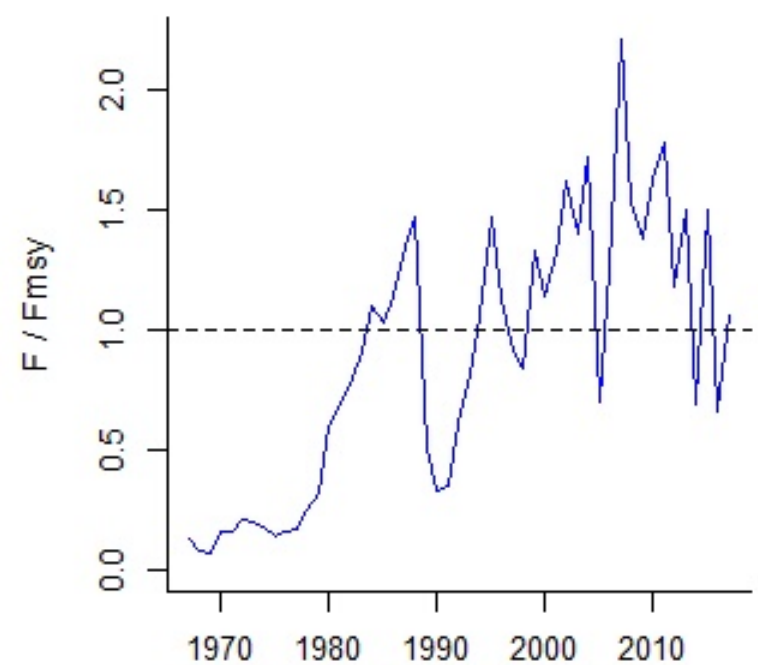

**F: Equilibrium curve**

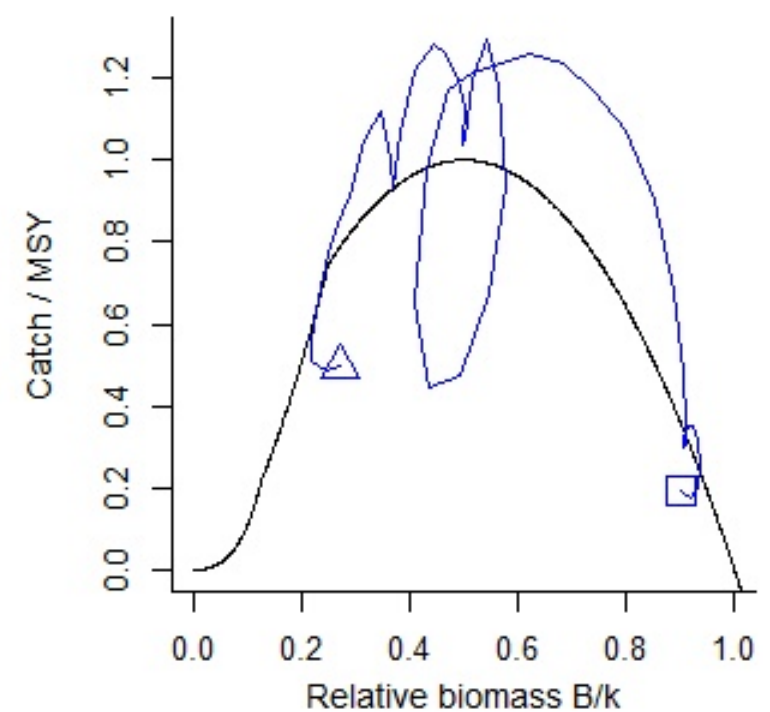

**Catch**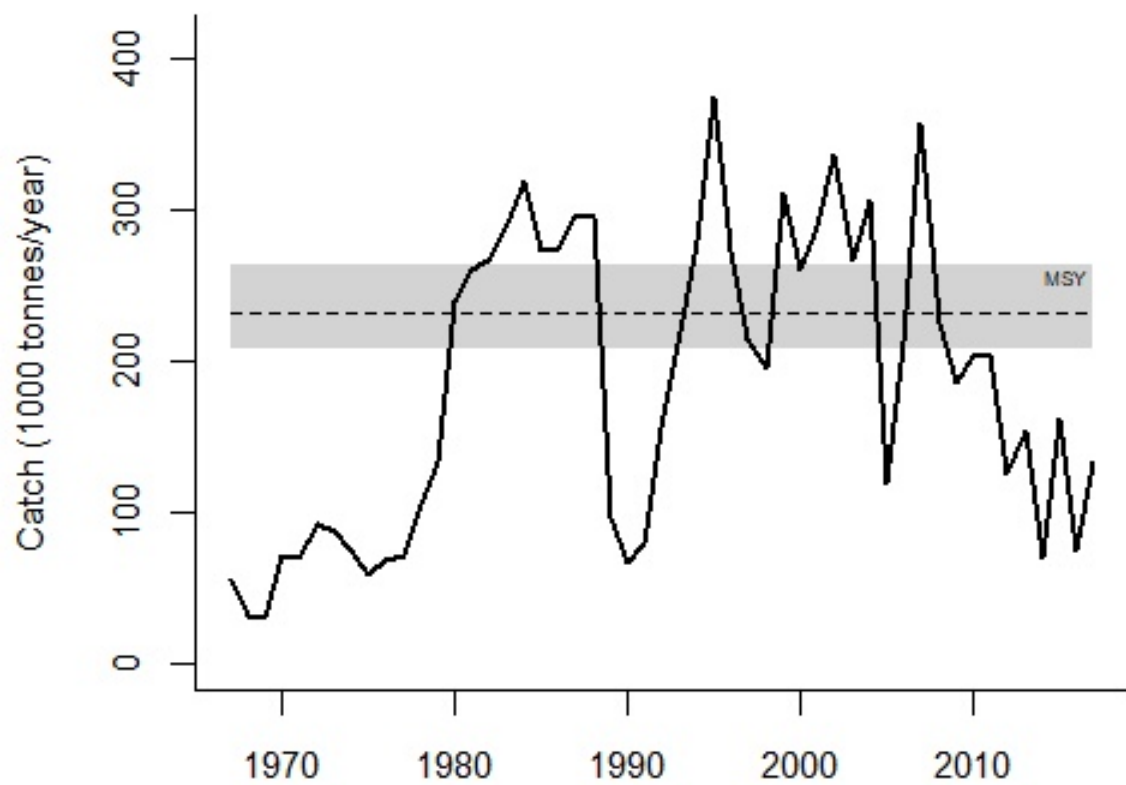**Stock size**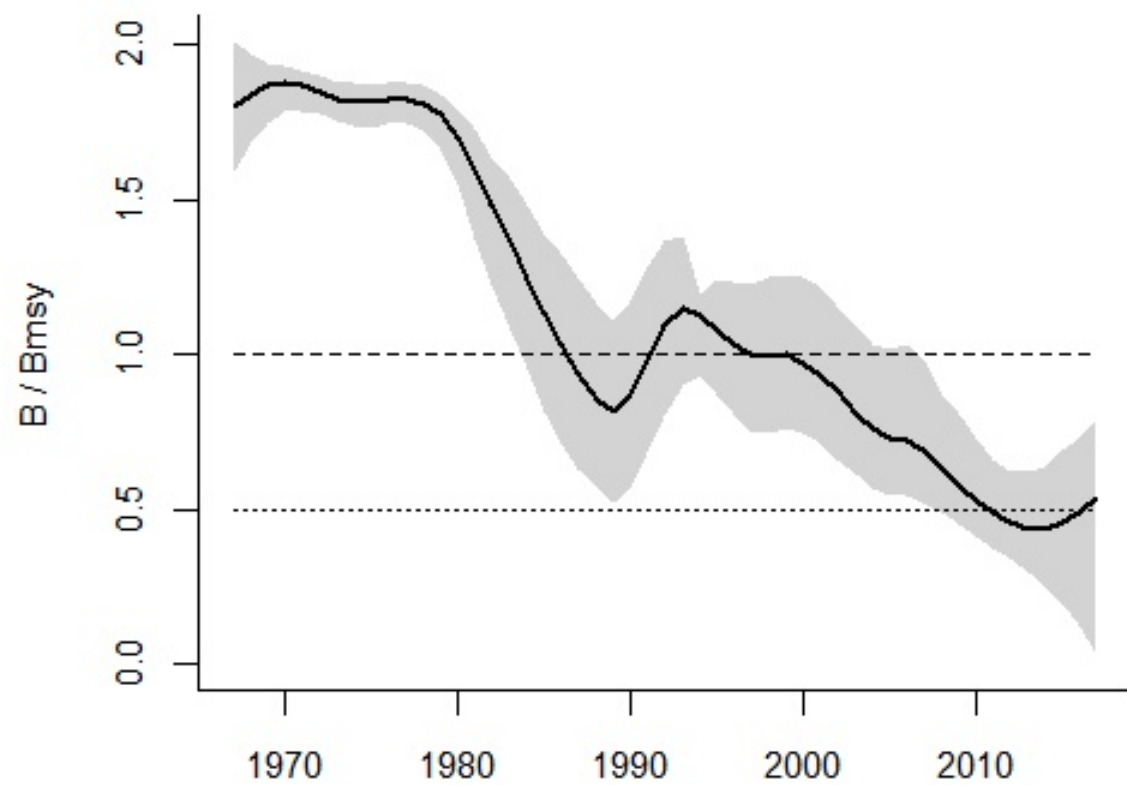**Exploitation**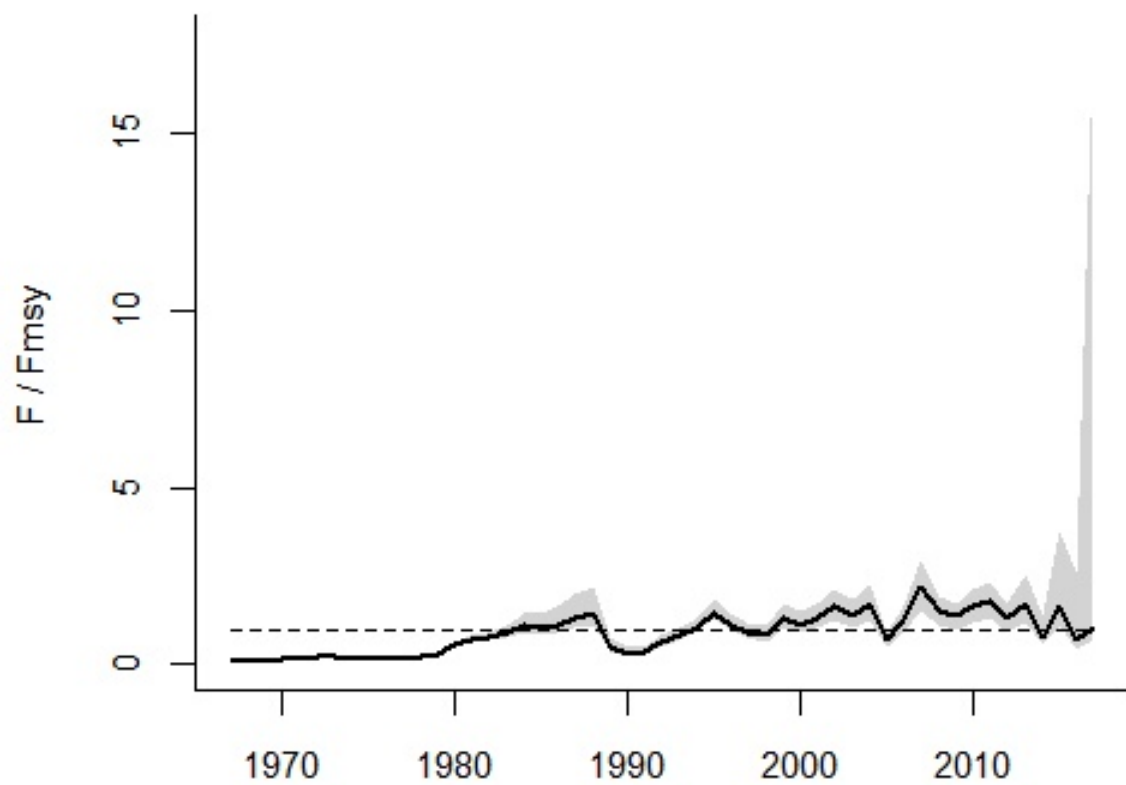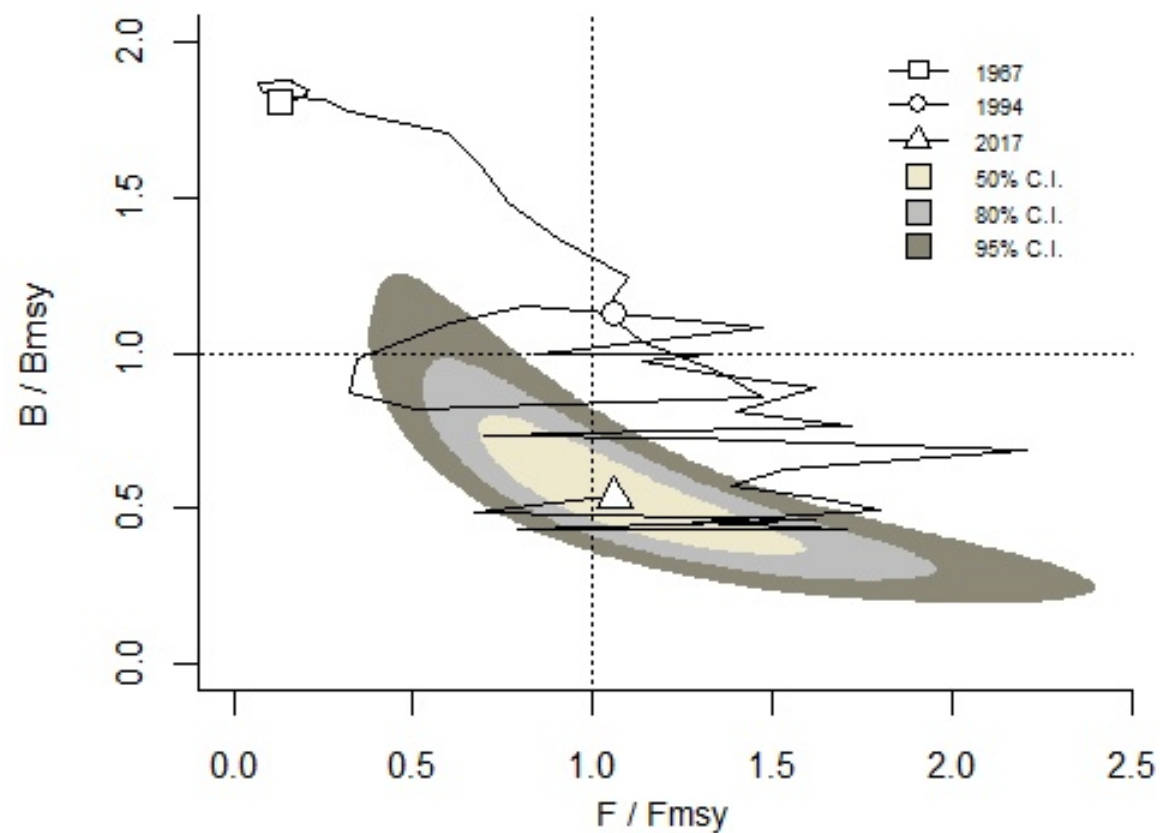

**A: Catch Sprat\_BS**

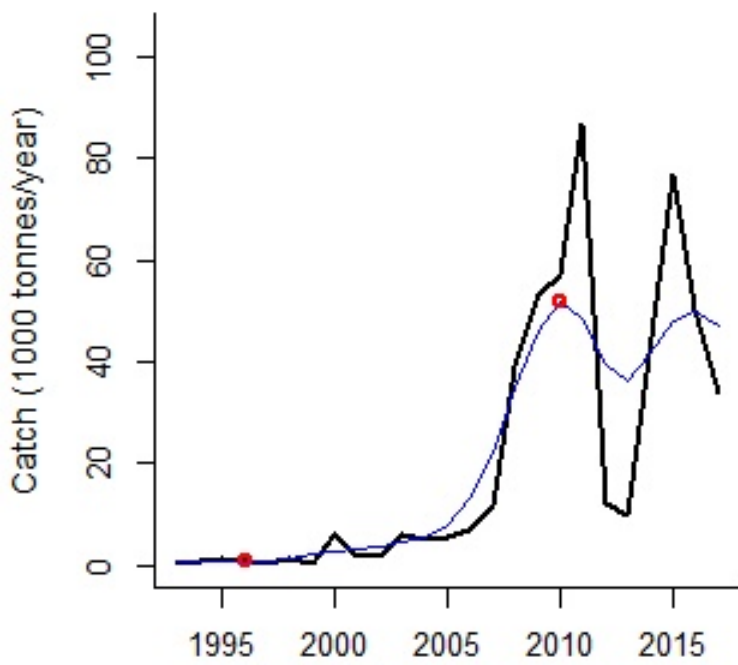

**B: Finding viable r-k**

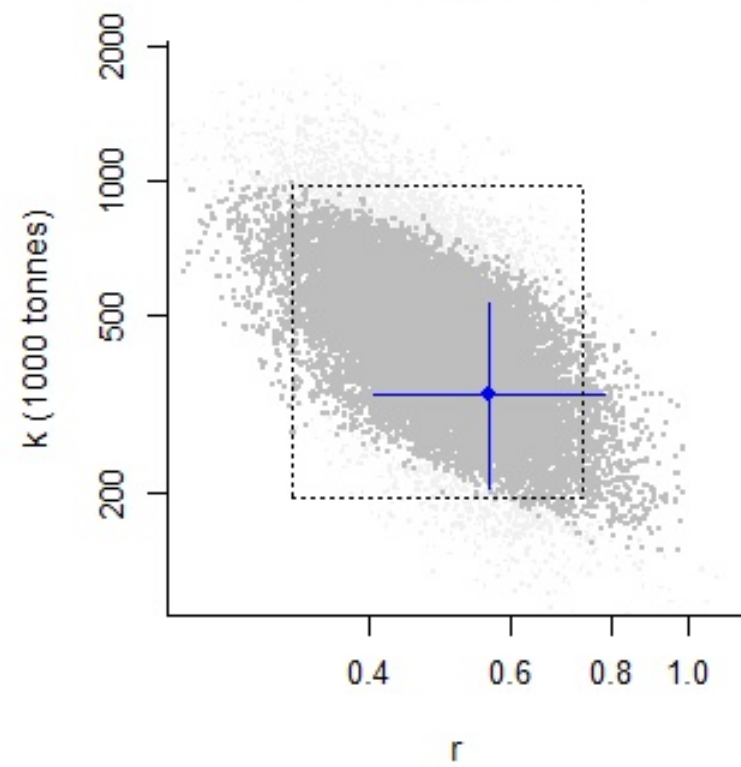

**C: Analysis of viable r-k**

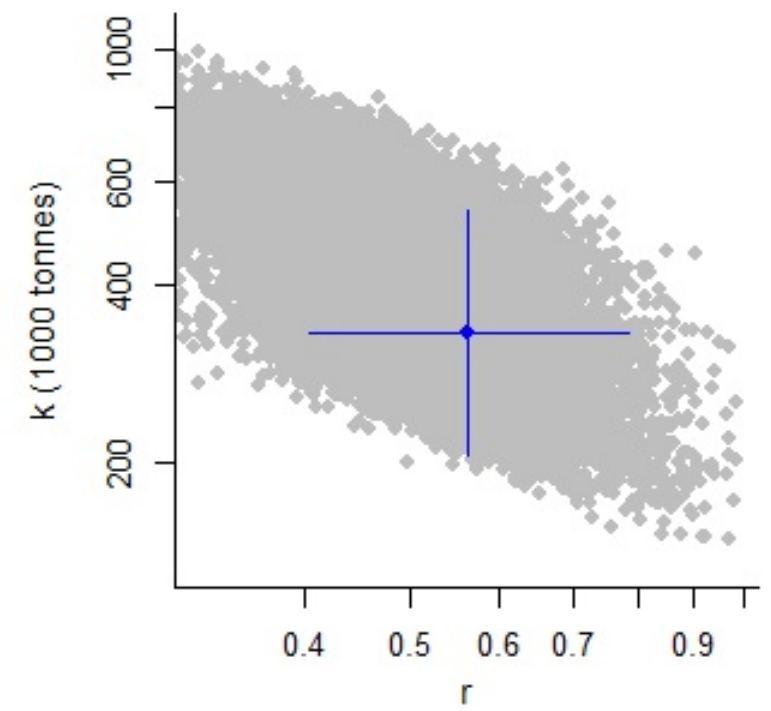

**D: Stock size**

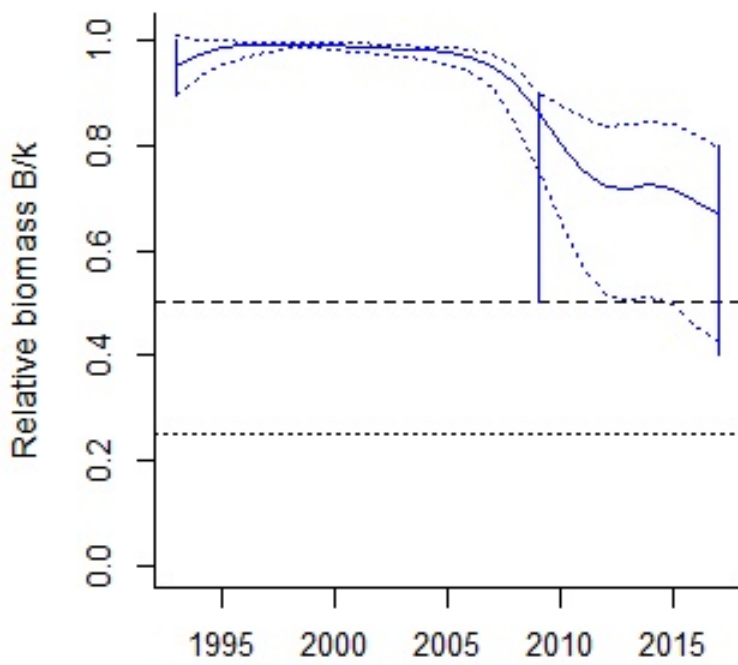

**E: Exploitation rate**

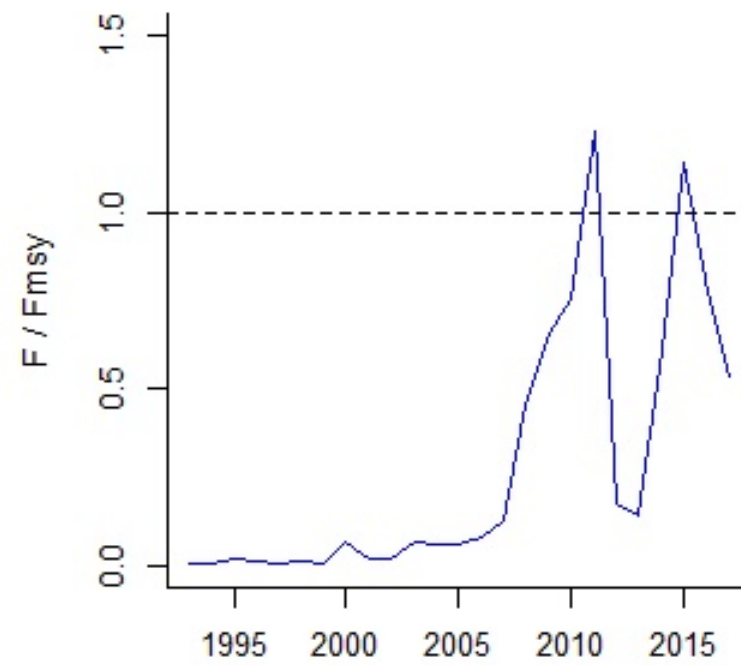

**F: Equilibrium curve**

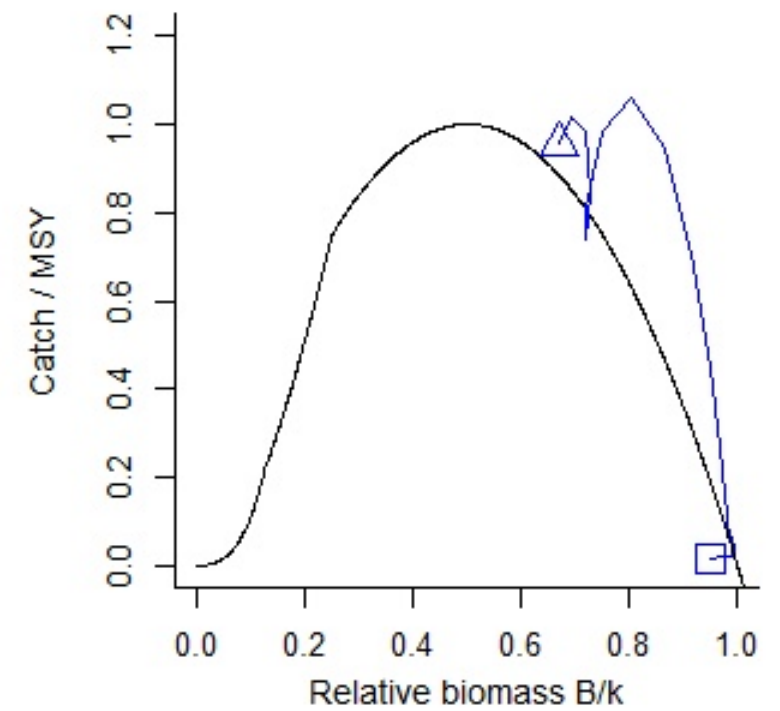



**Catch**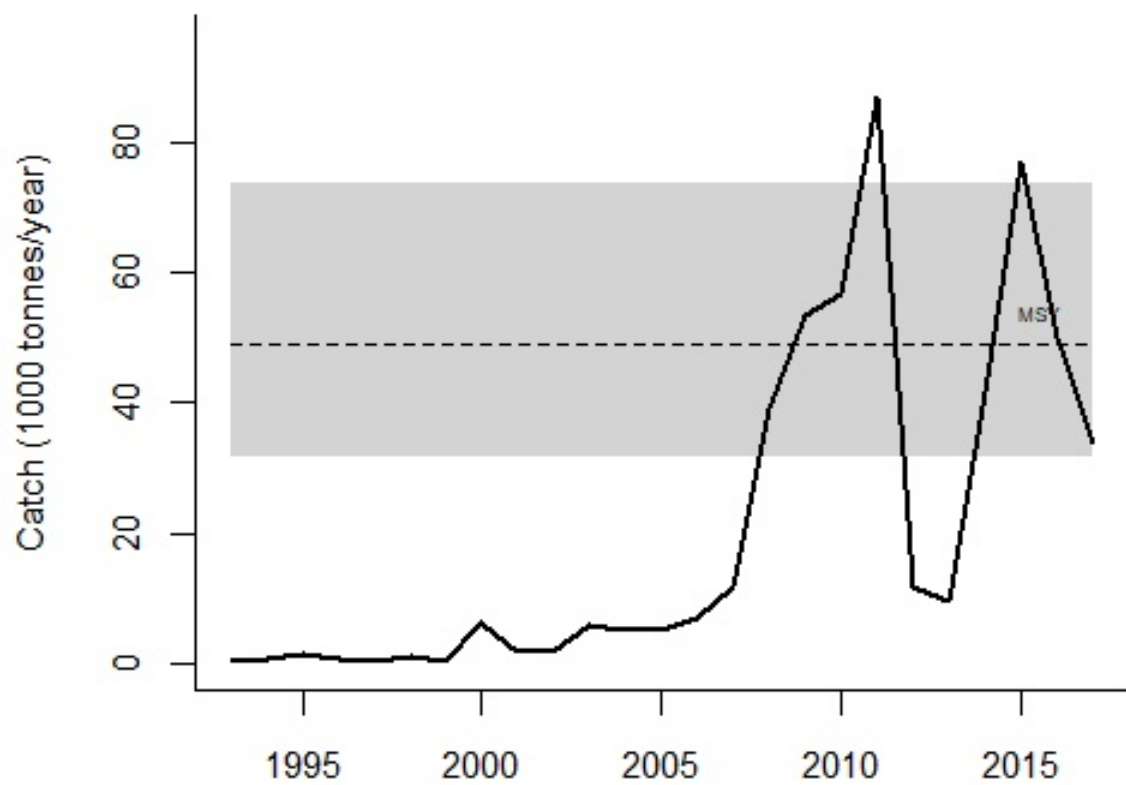**Stock size**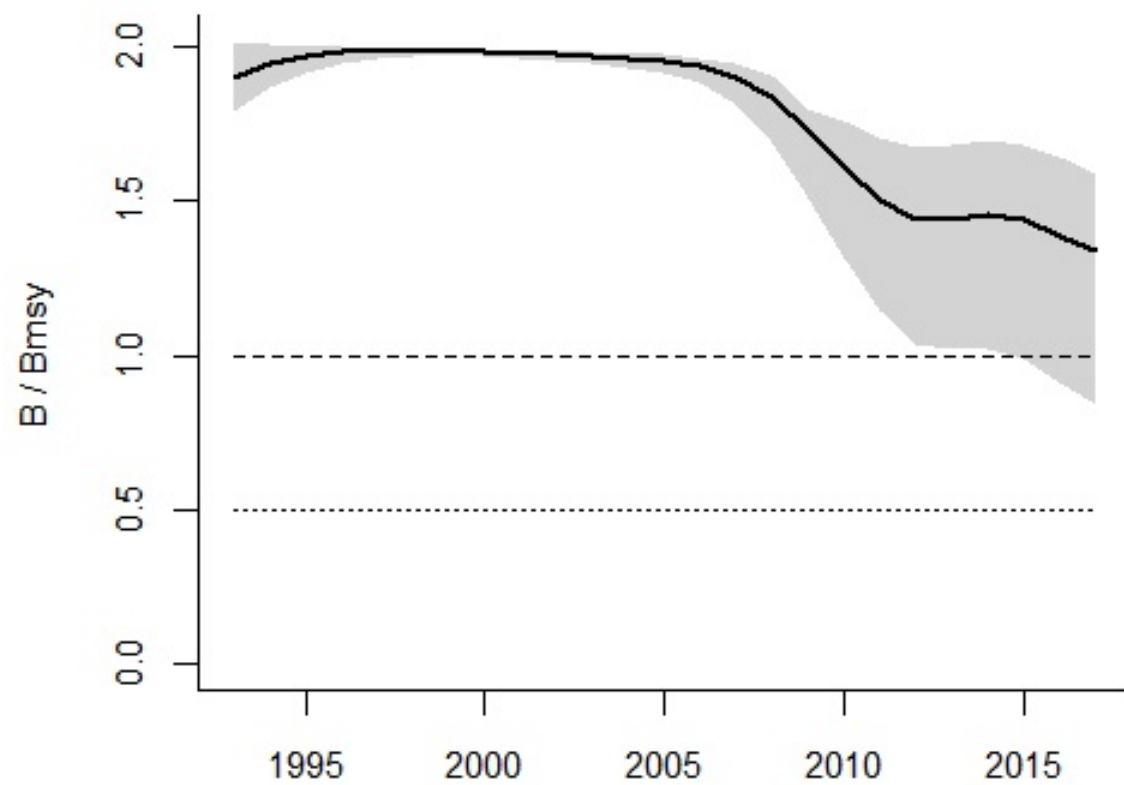**Exploitation**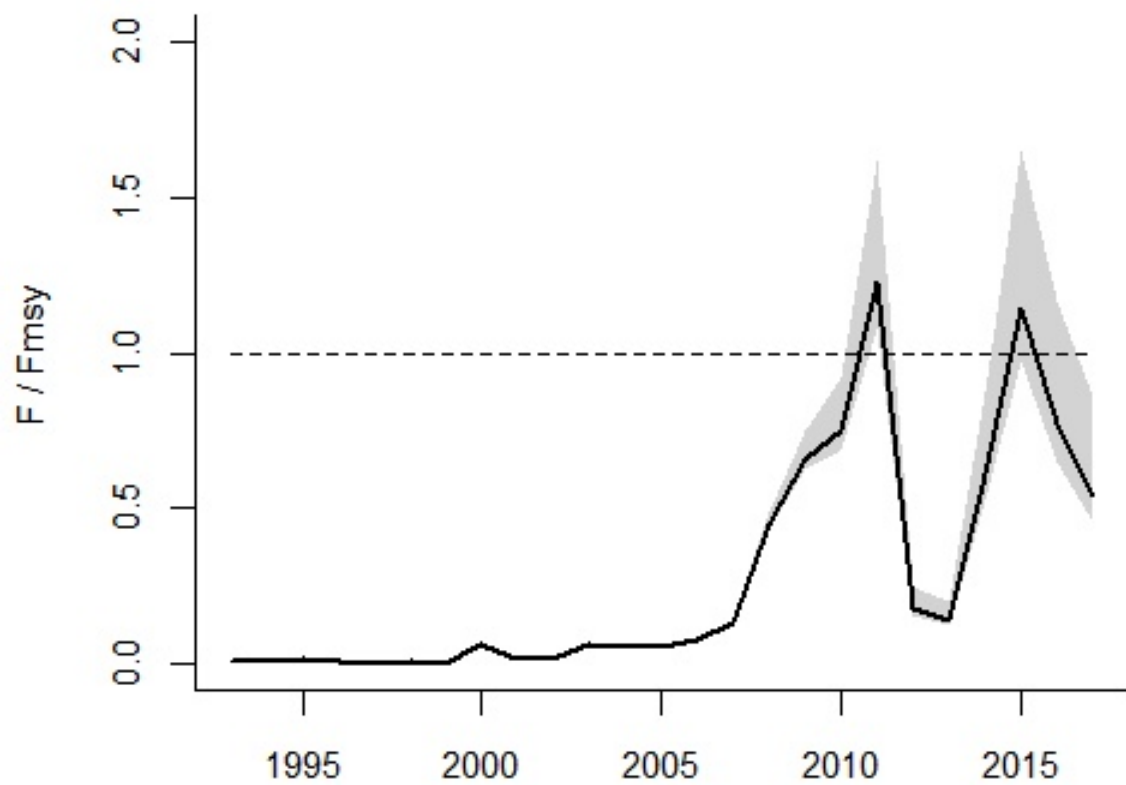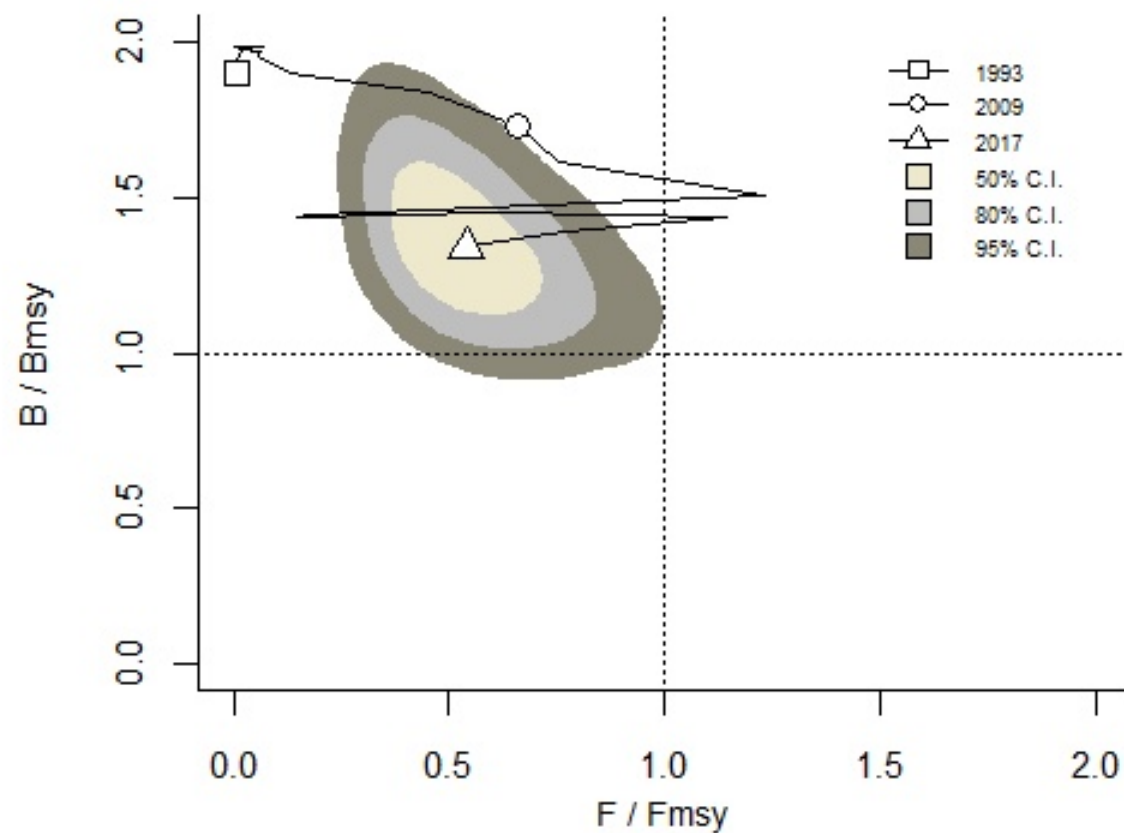

**A: Catch MedHMack\_BS**

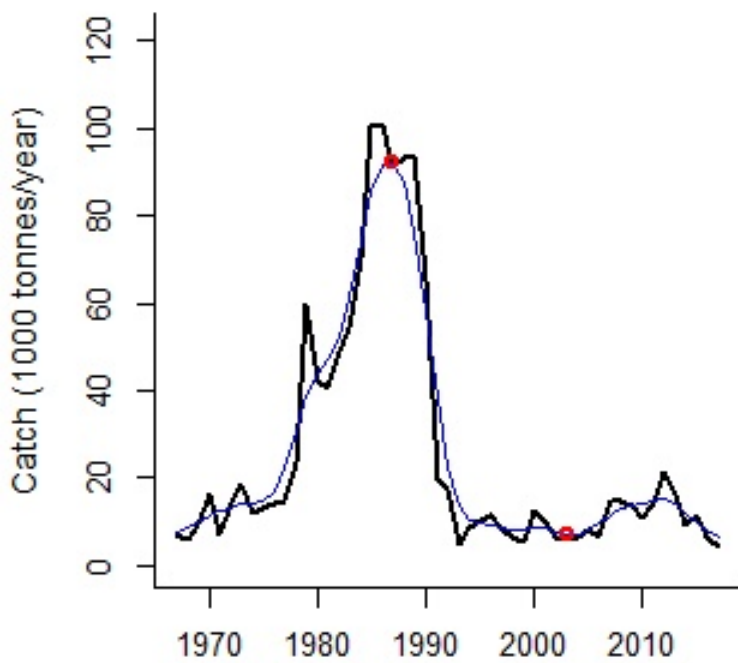

**B: Finding viable r-k**

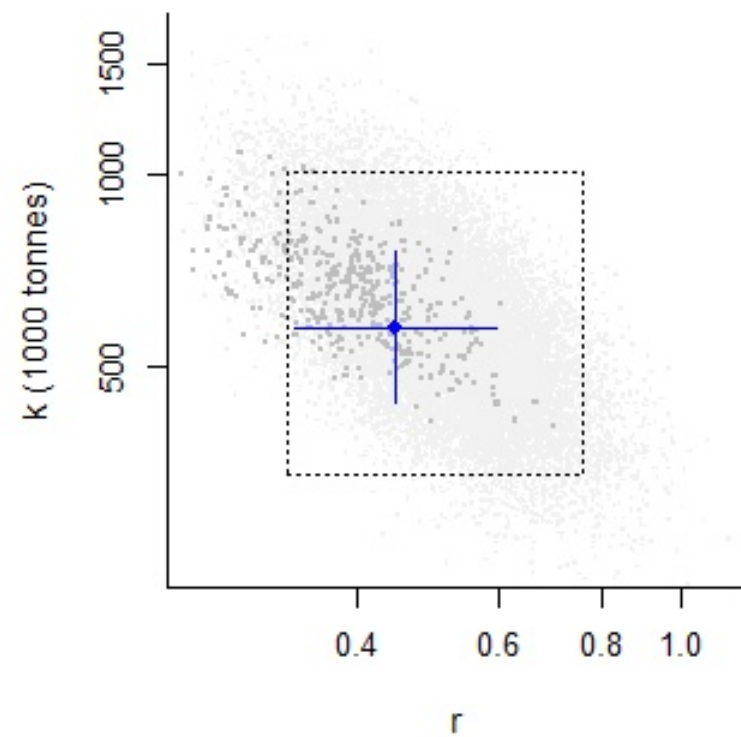

**C: Analysis of viable r-k**

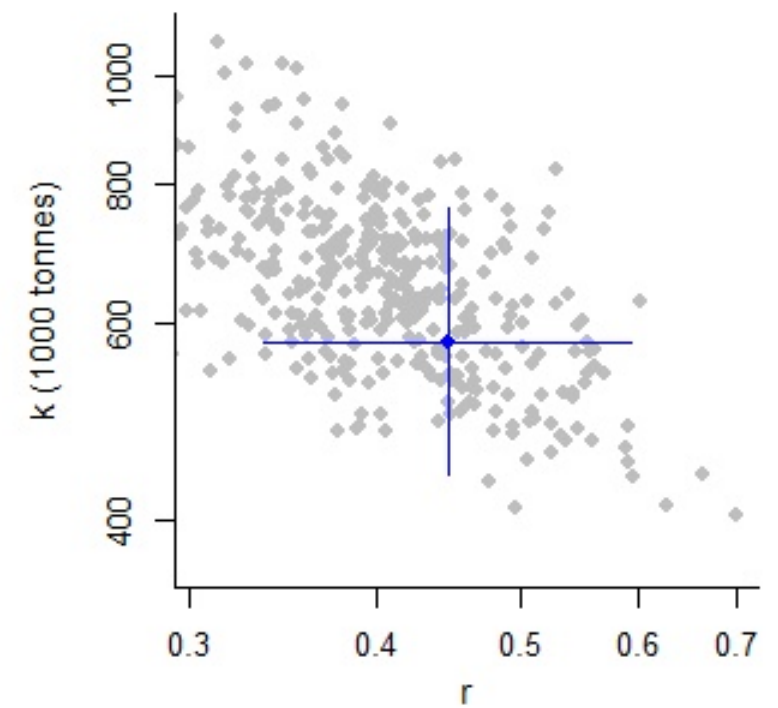

**D: Stock size**

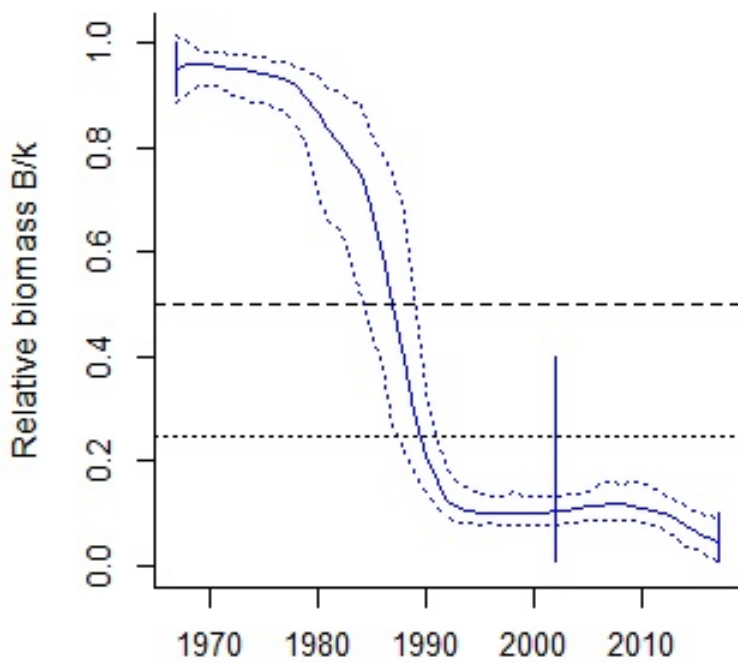

**E: Exploitation rate**

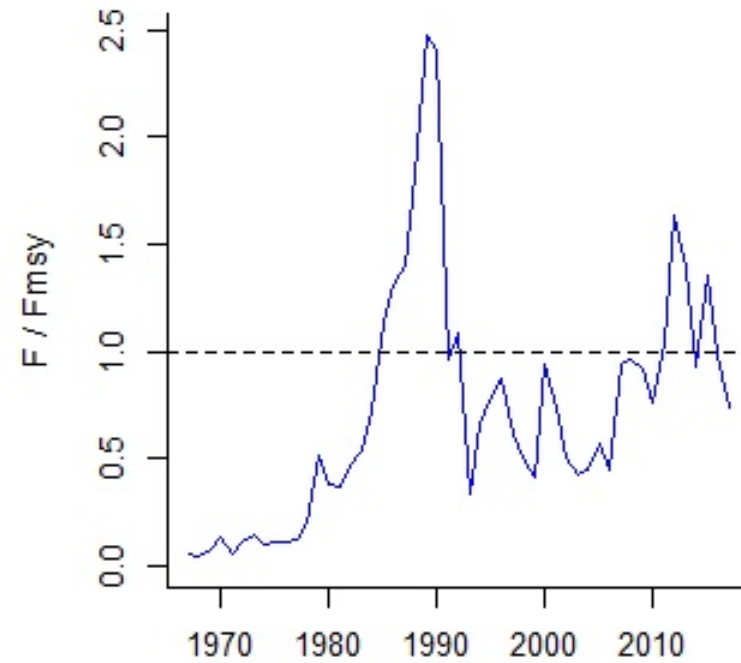

**F: Equilibrium curve**

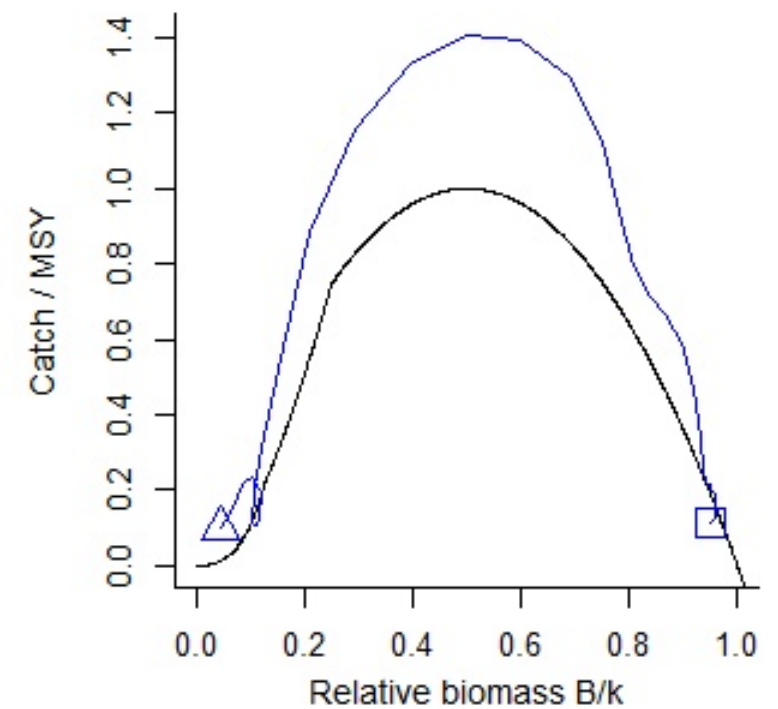

**Catch**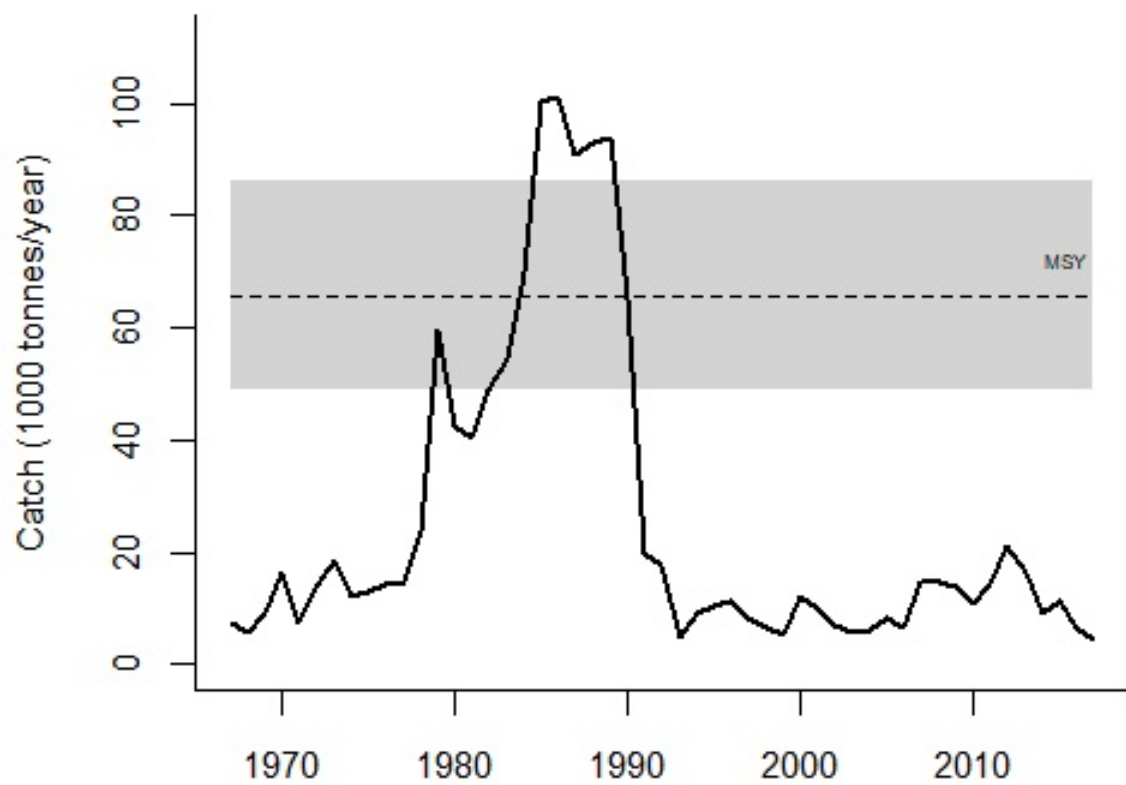**Stock size**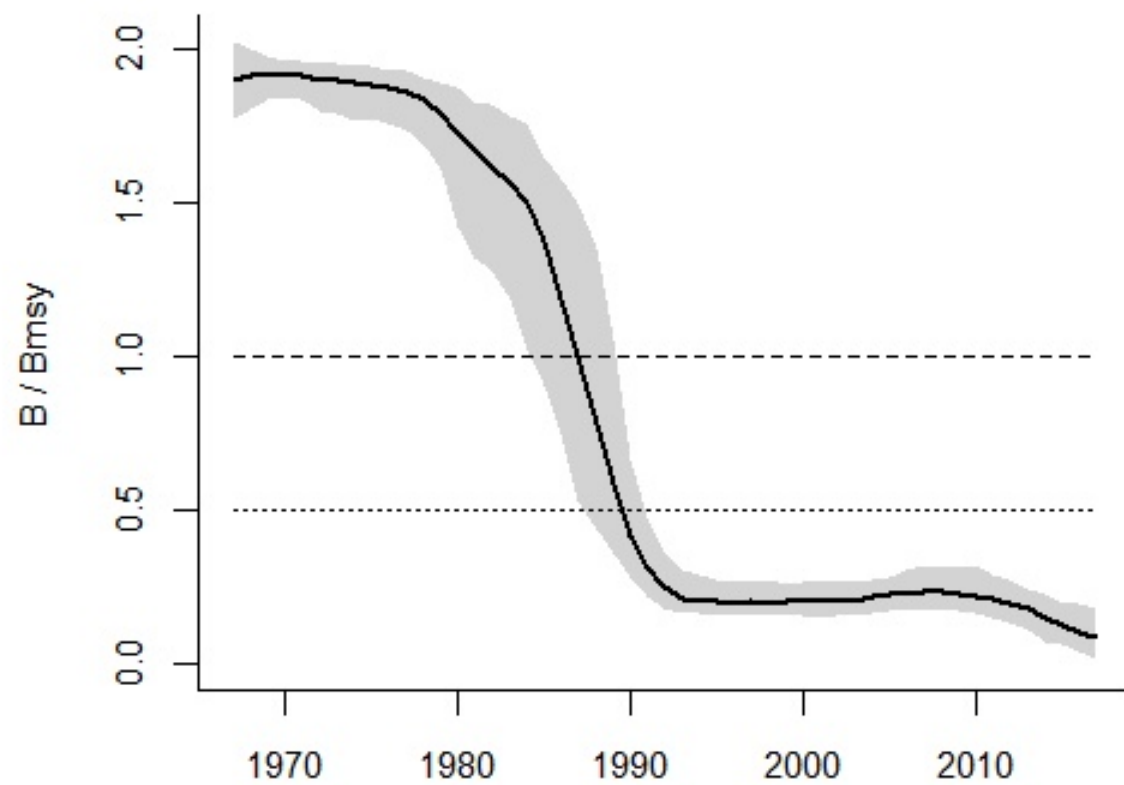**Exploitation**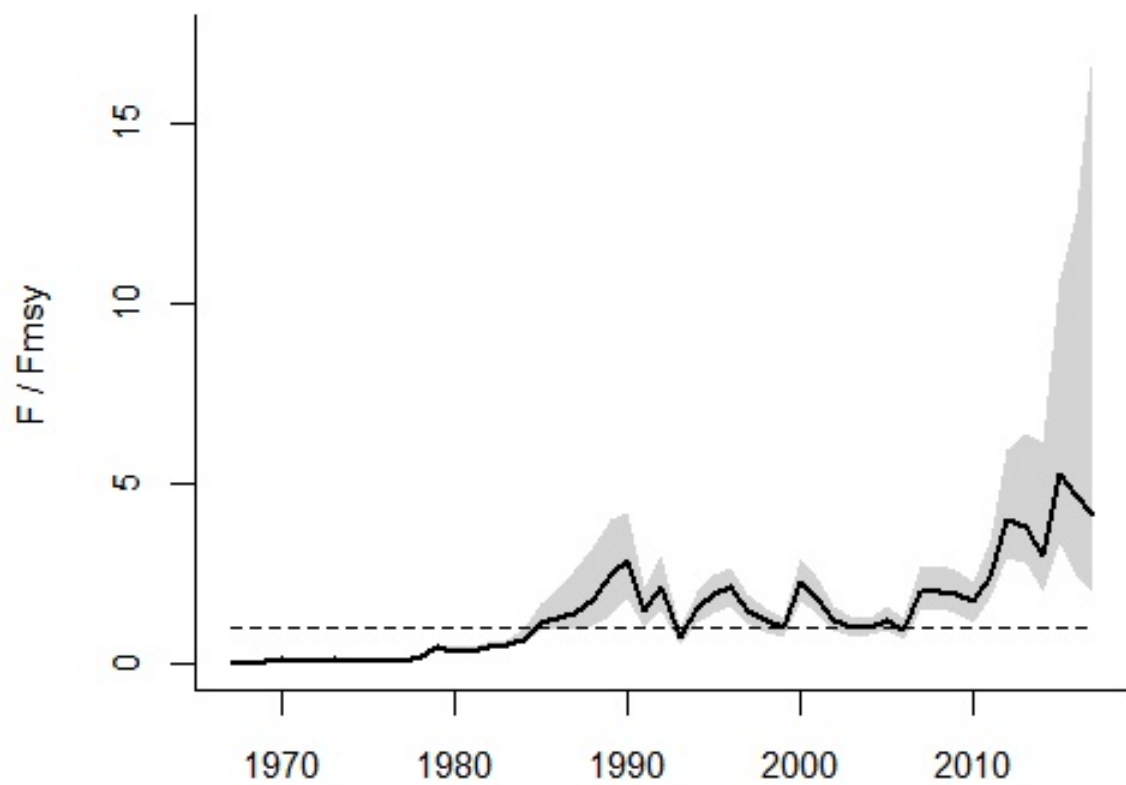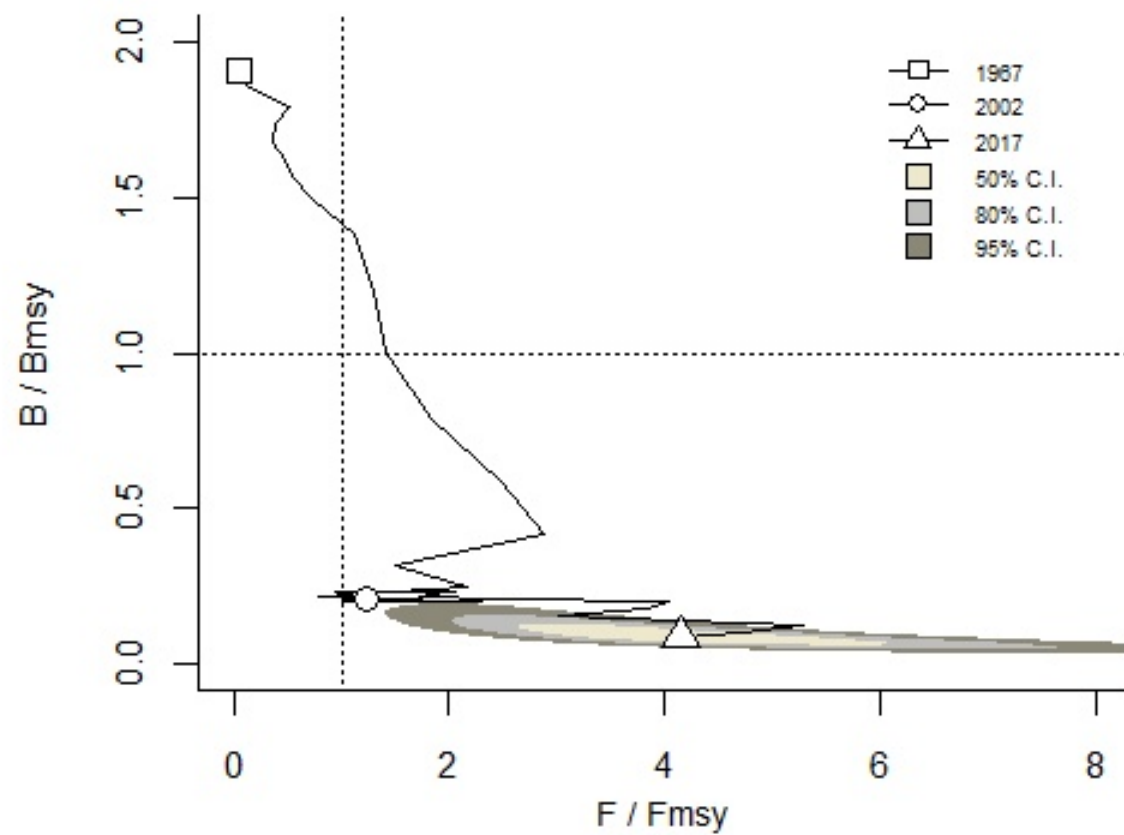

**A: Catch HorseMack\_BS**

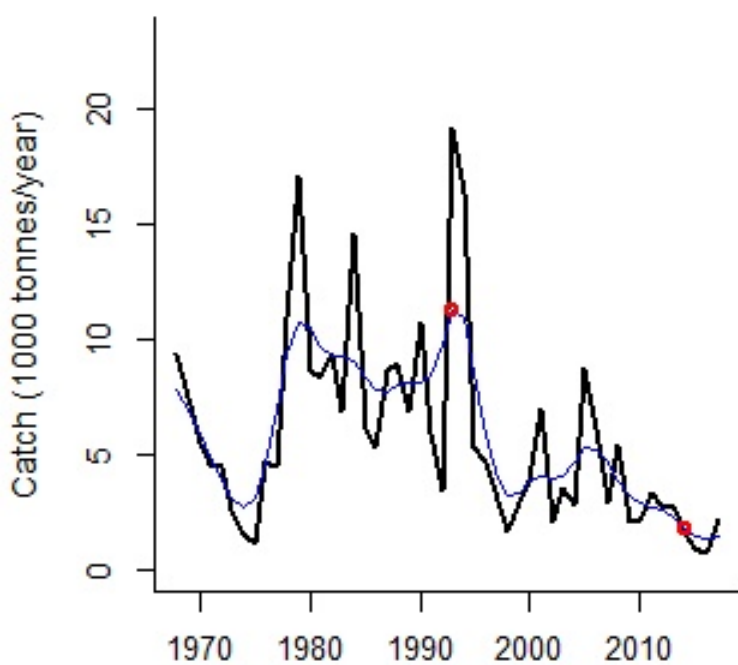

**B: Finding viable r-k**

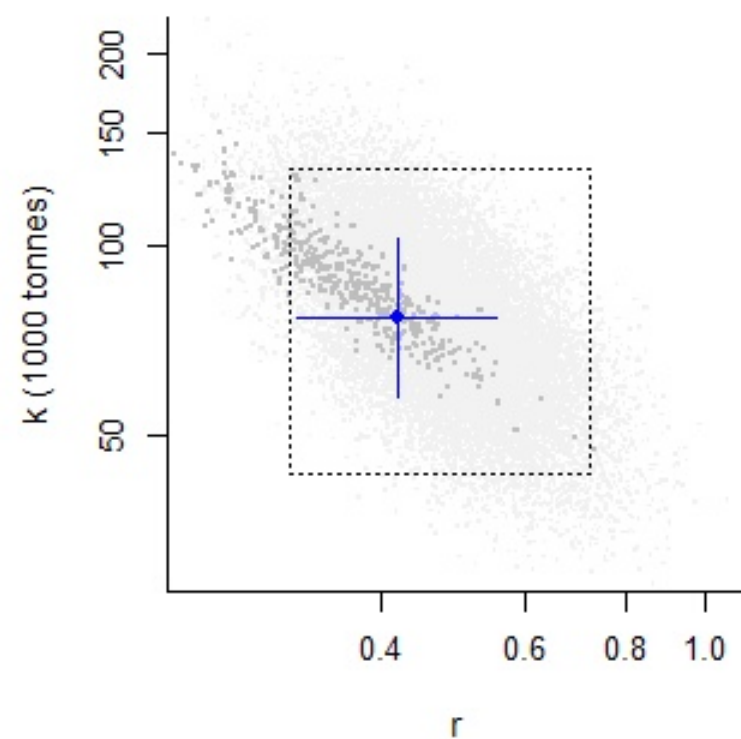

**C: Analysis of viable r-k**

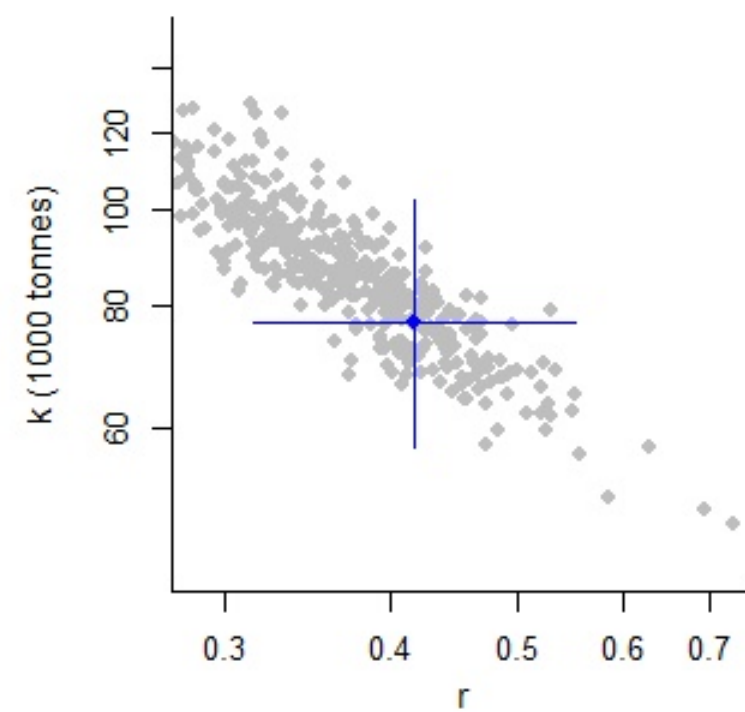

**D: Stock size**

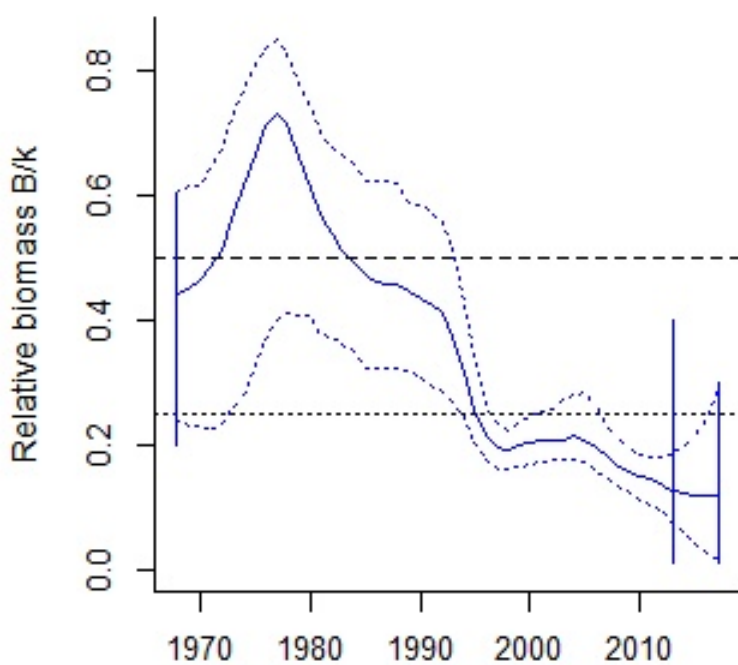

**E: Exploitation rate**

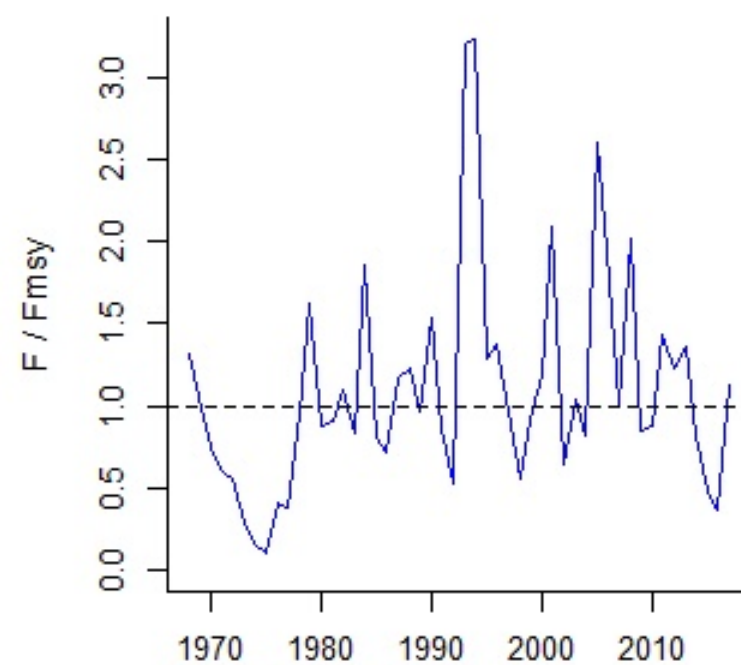

**F: Equilibrium curve**

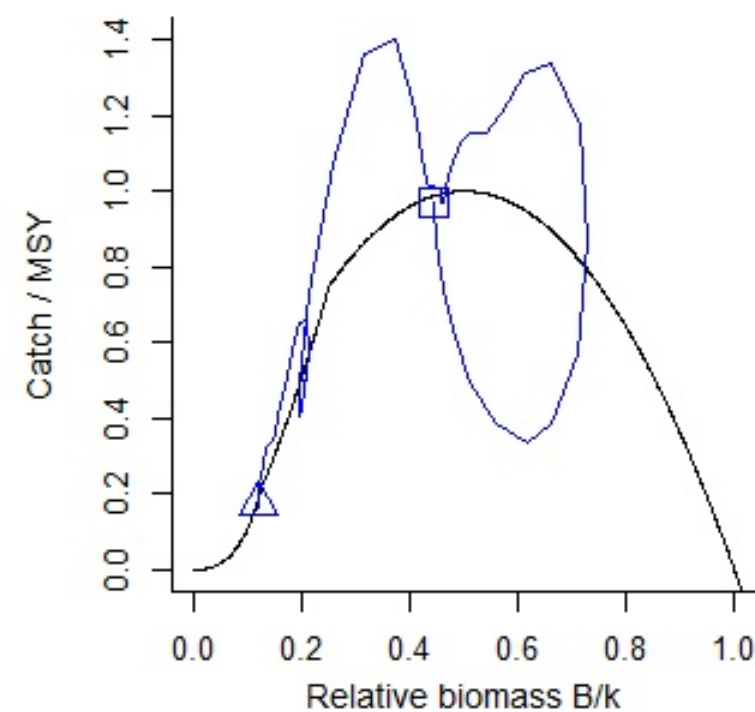



**Catch**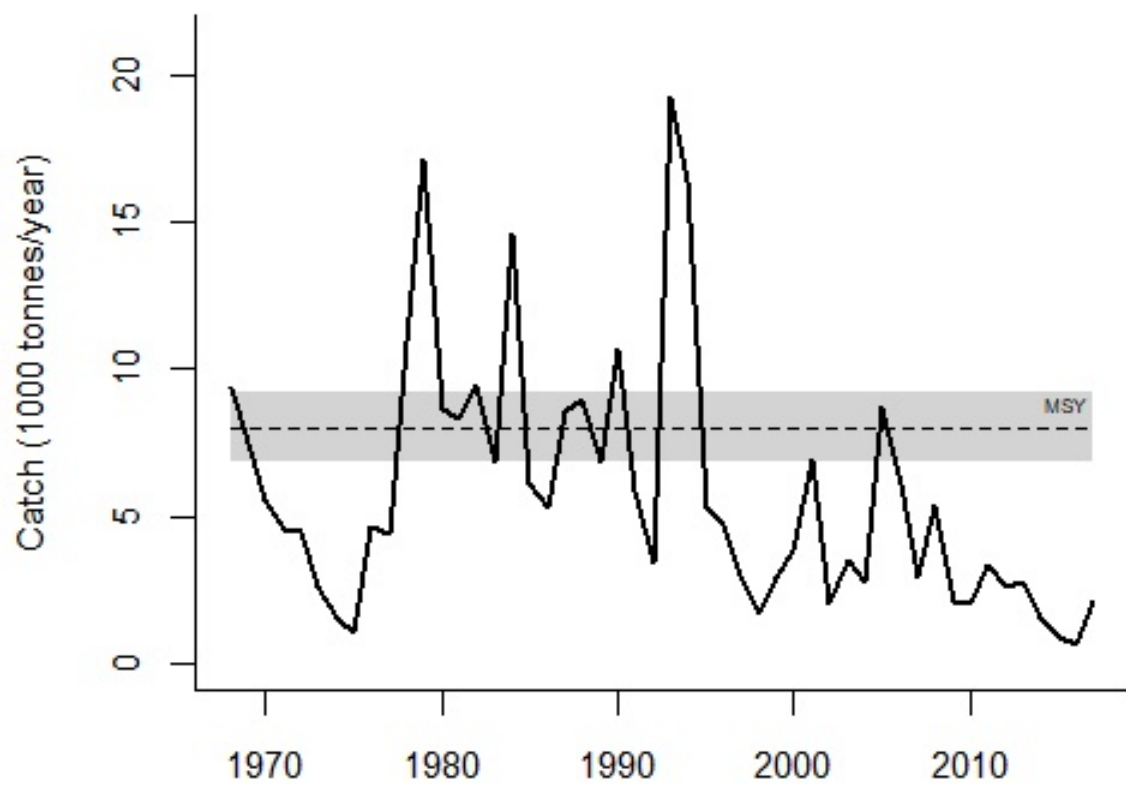**Stock size**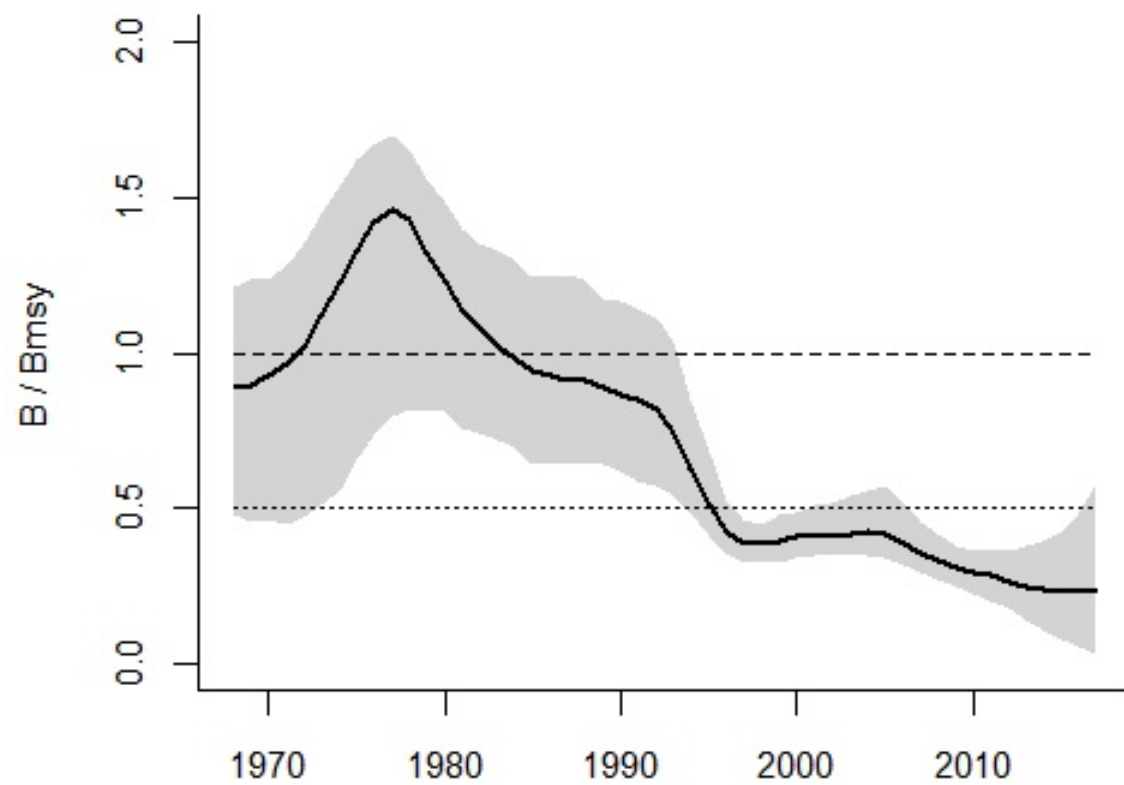**Exploitation**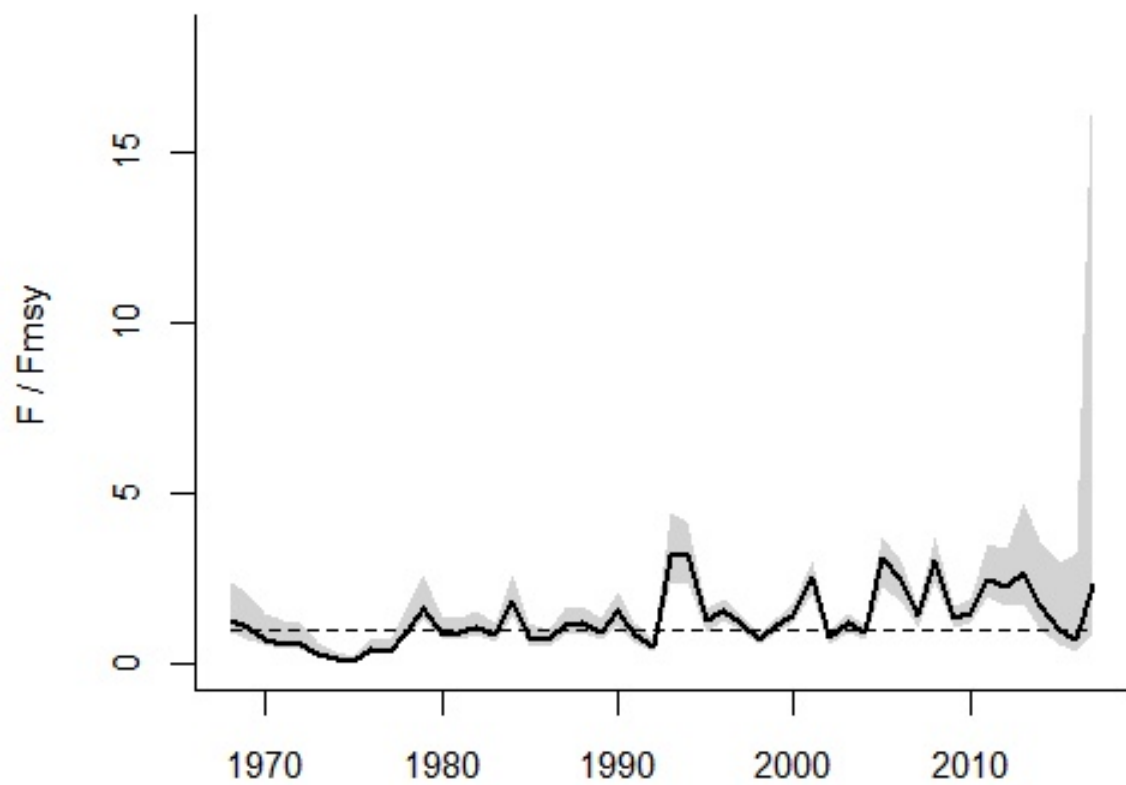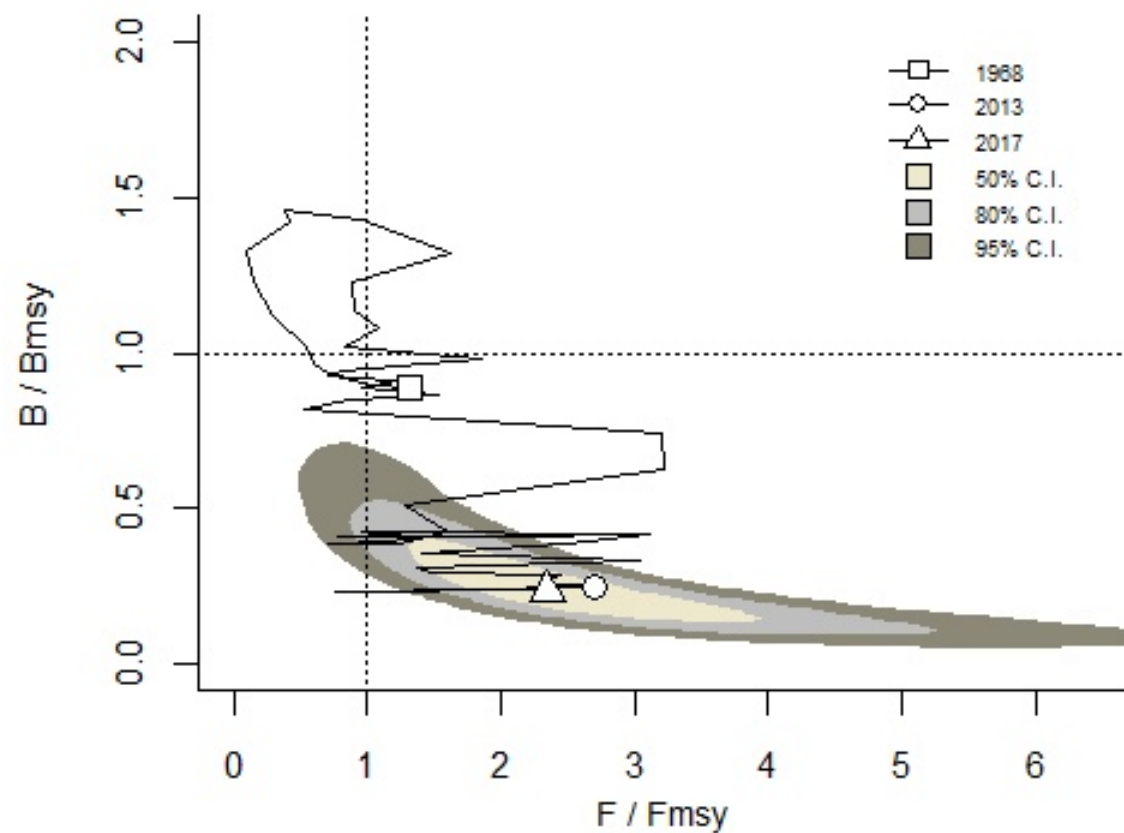



**A: Catch AChub\_BS**

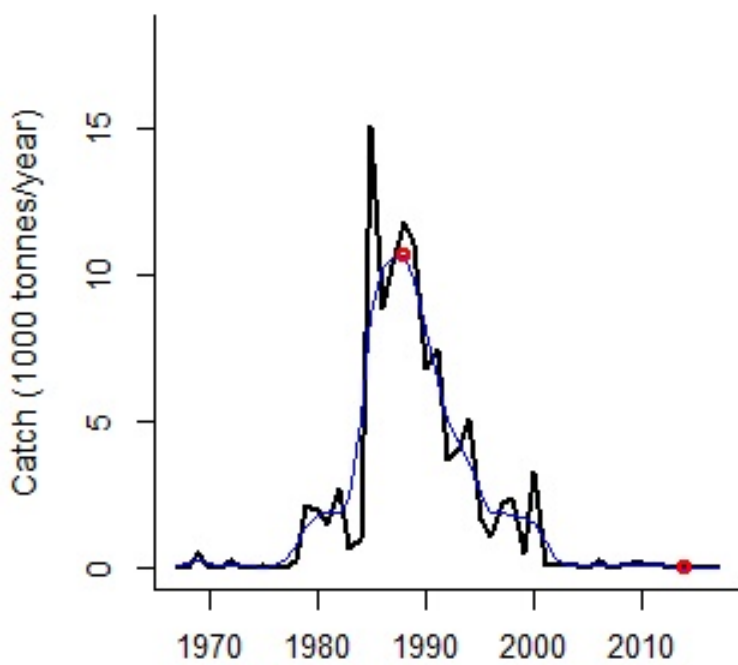

**B: Finding viable r-k**

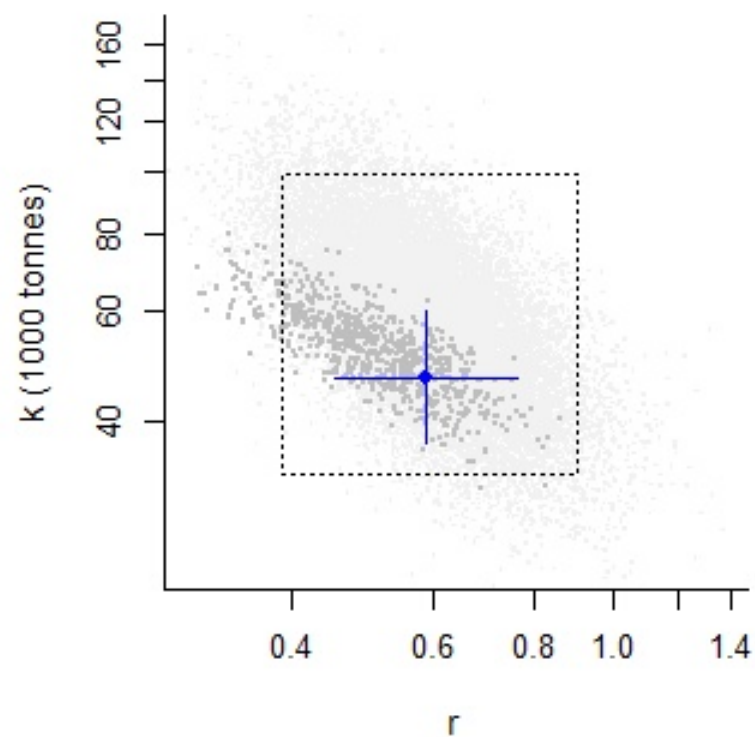

**C: Analysis of viable r-k**

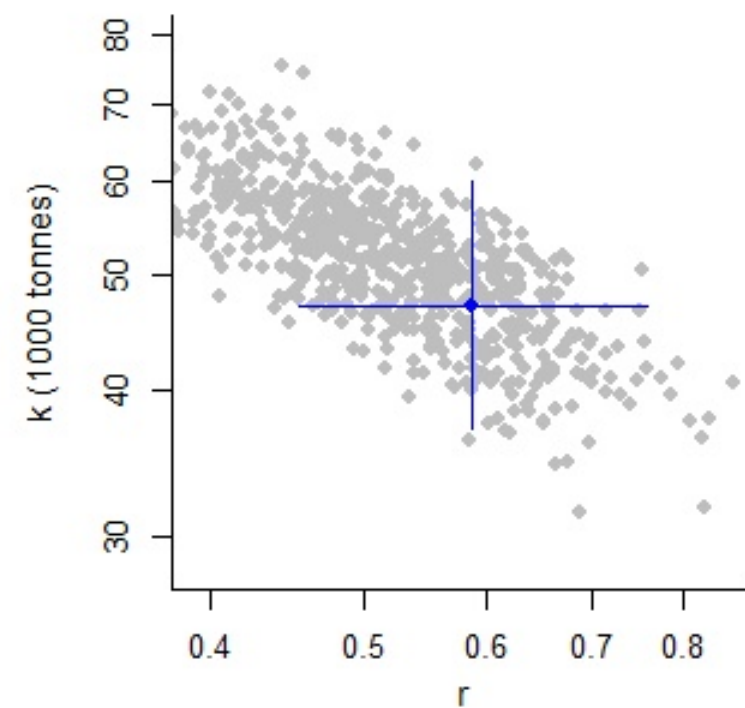

**D: Stock size**

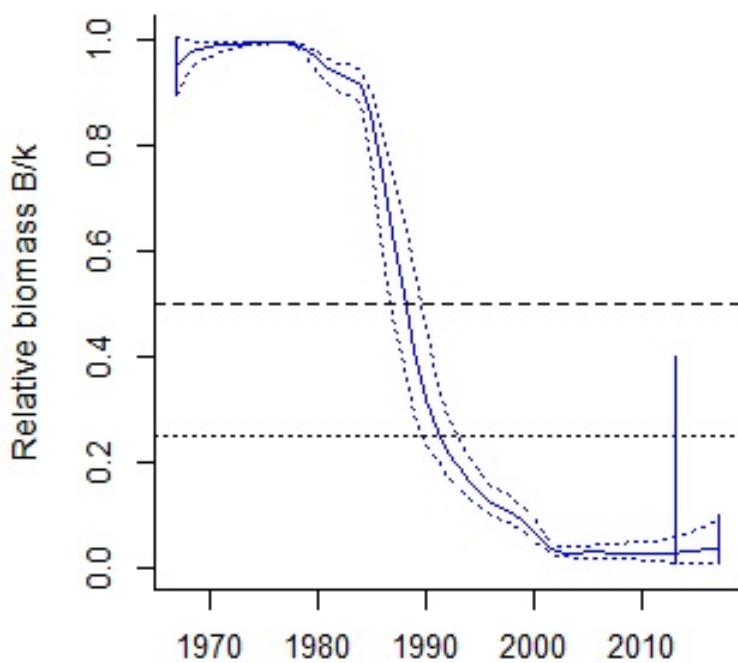

**E: Exploitation rate**

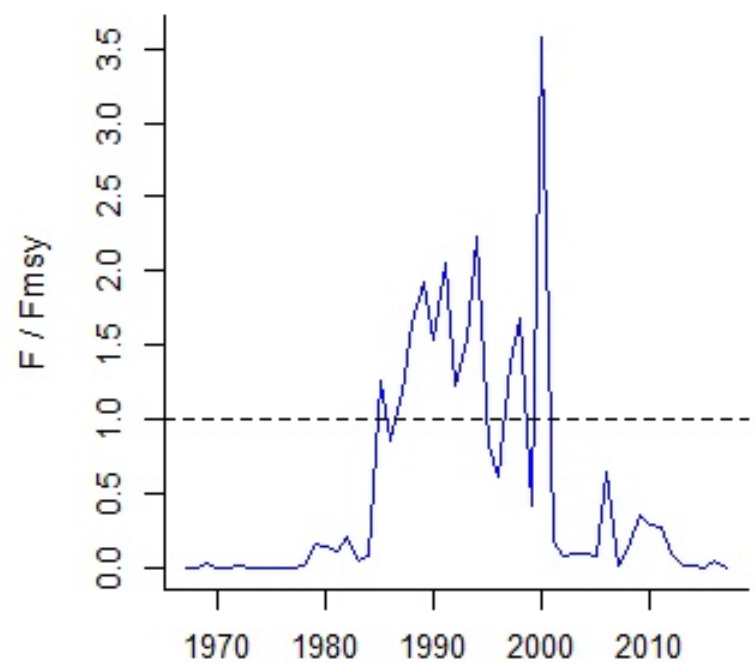

**F: Equilibrium curve**

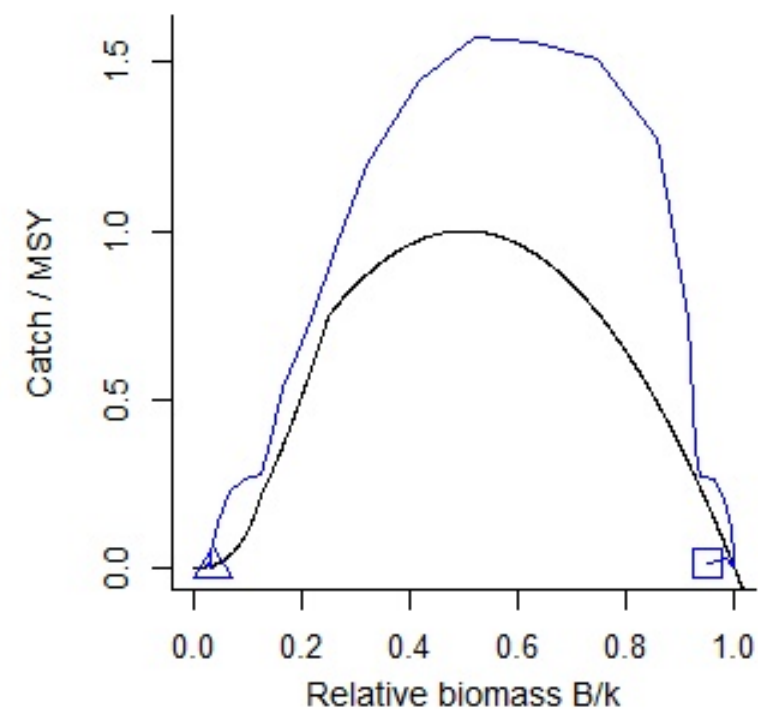

**Catch**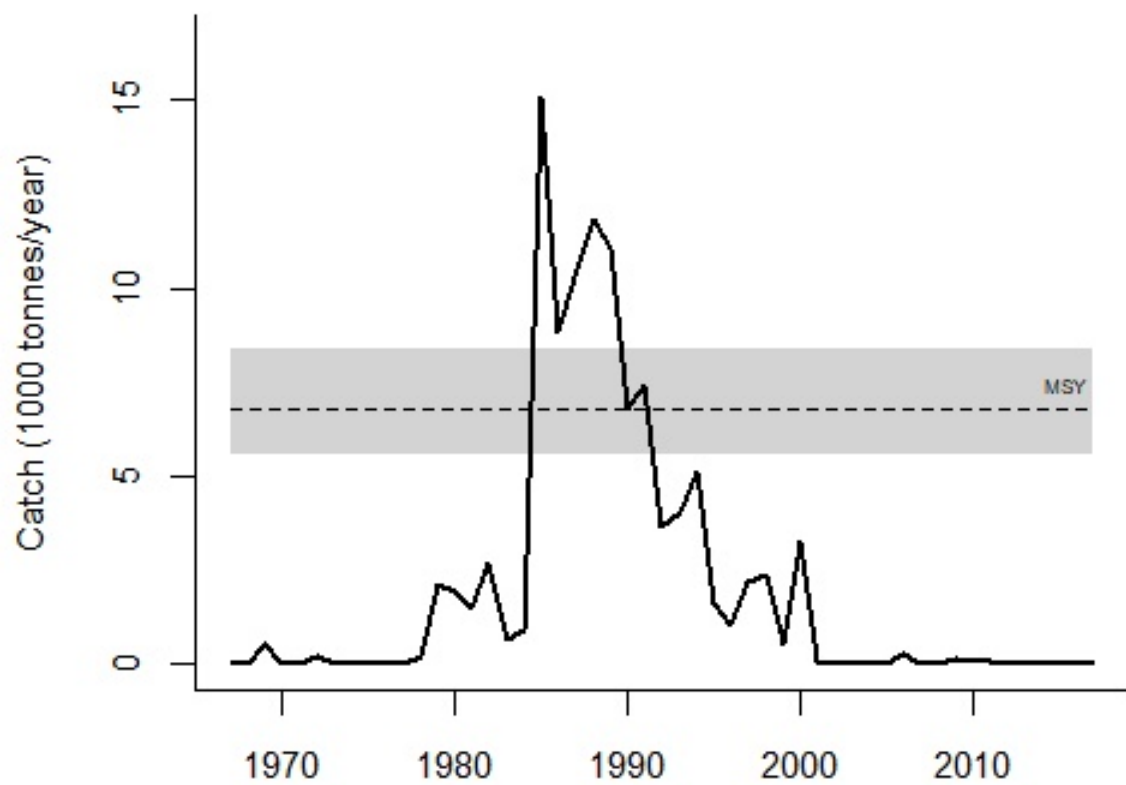**Stock size**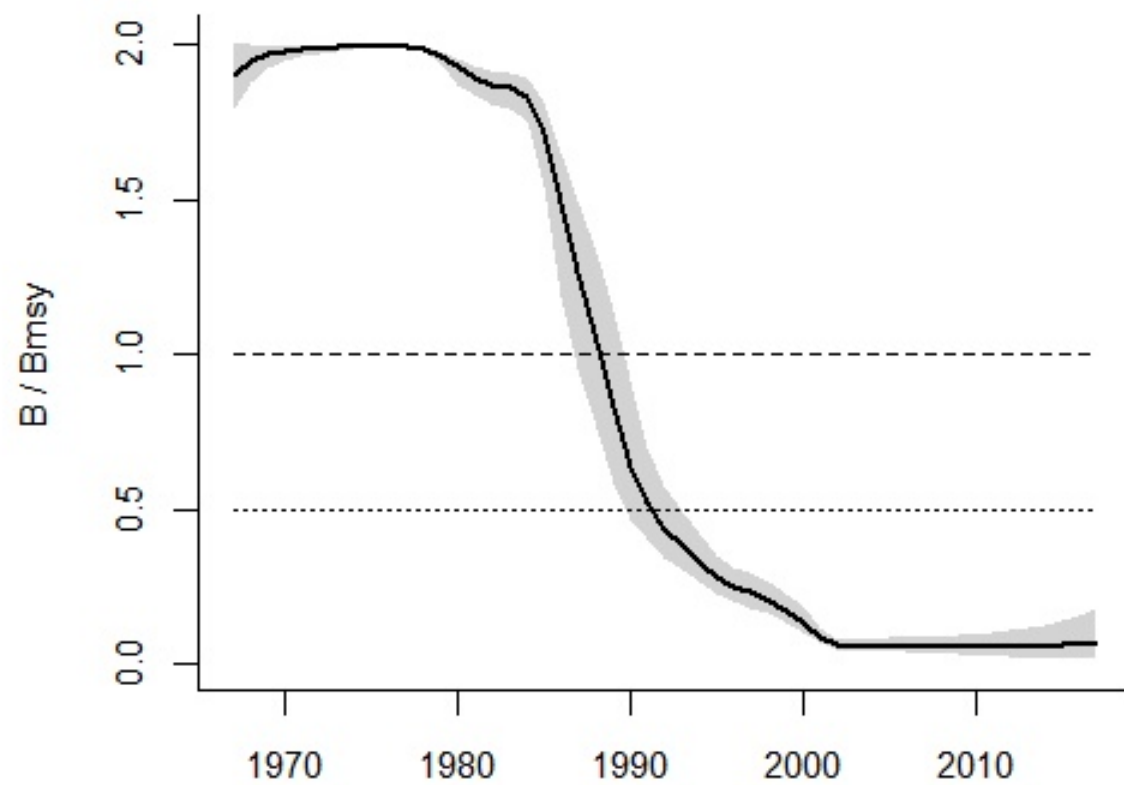**Exploitation**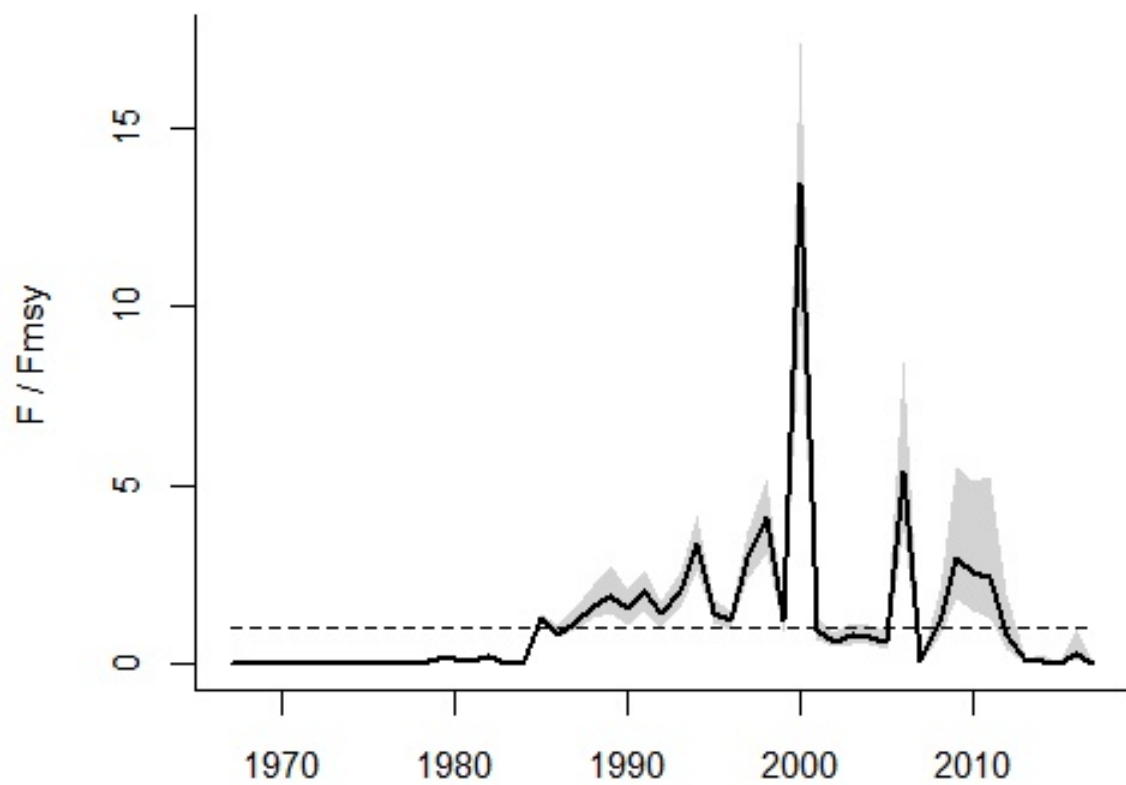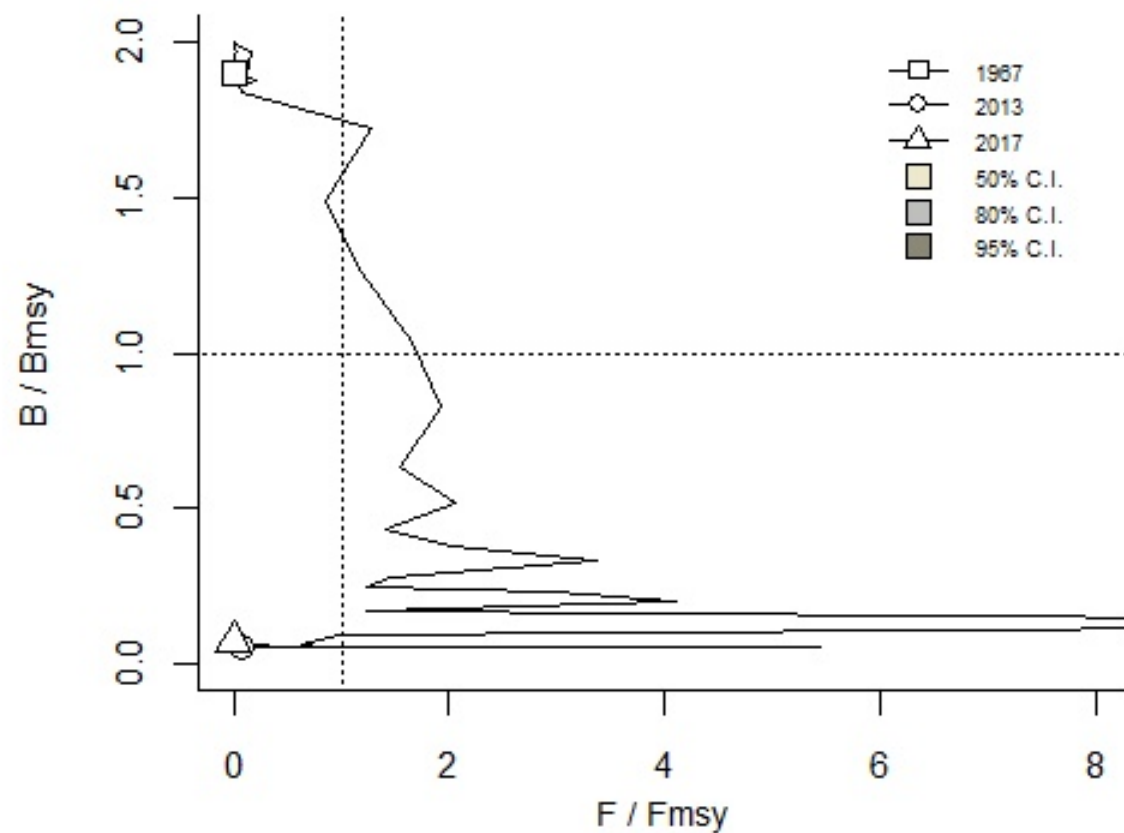

**A: Catch Shad\_BS**

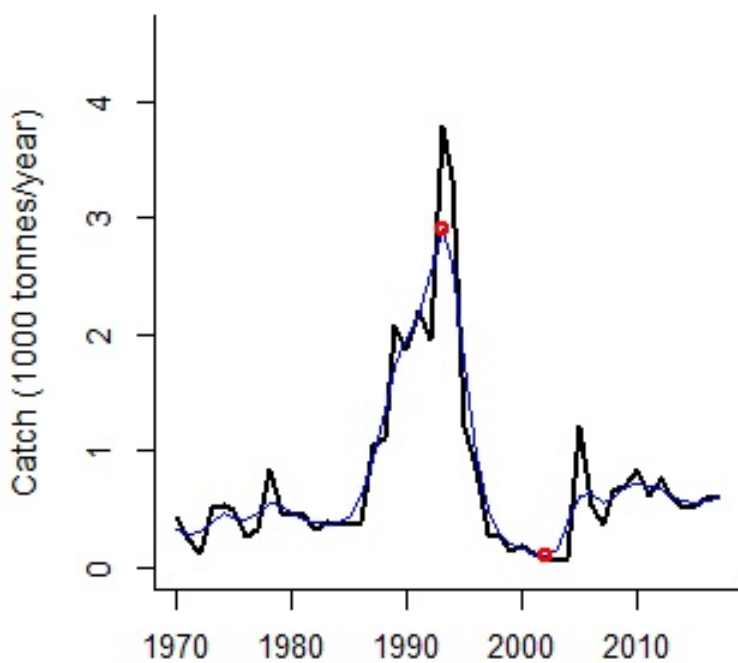

**B: Finding viable r-k**

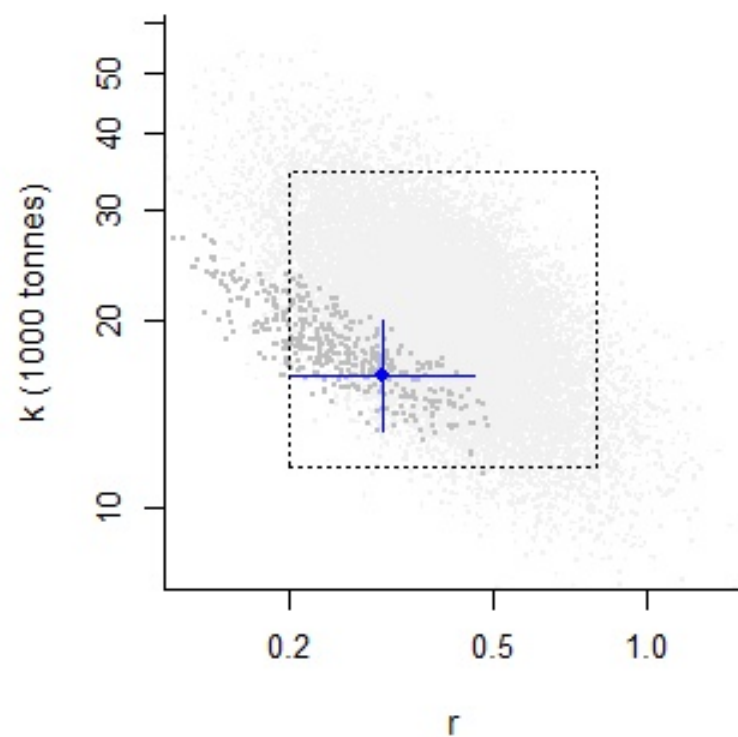

**C: Analysis of viable r-k**

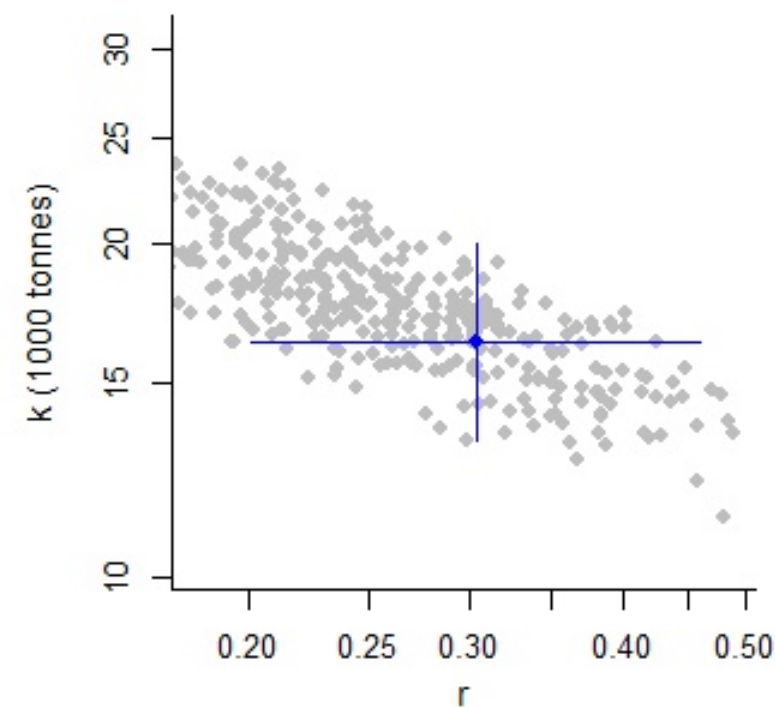

**D: Stock size**

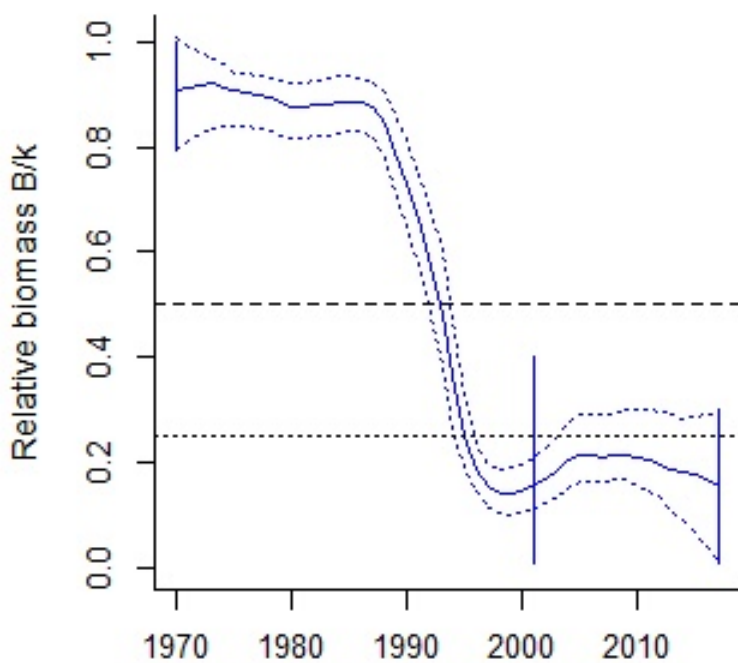

**E: Exploitation rate**

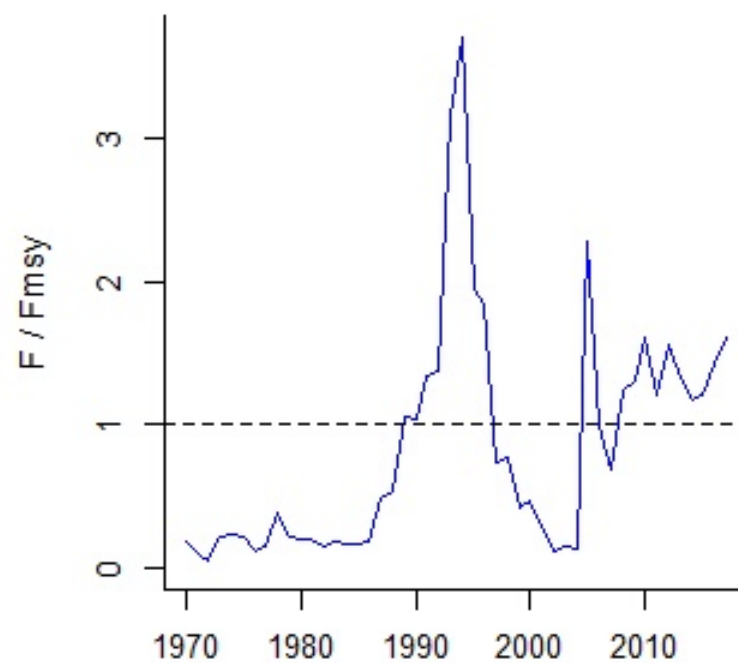

**F: Equilibrium curve**

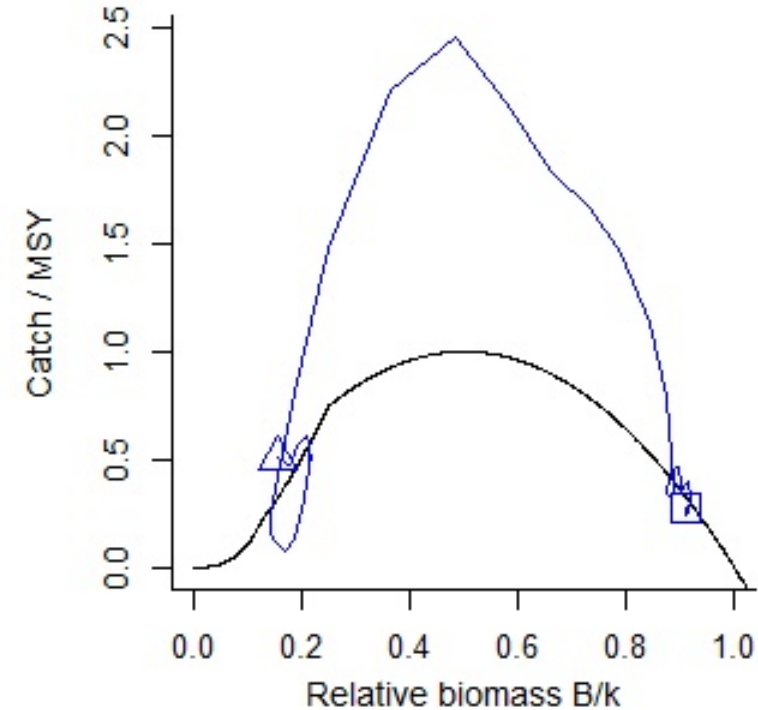

**Catch**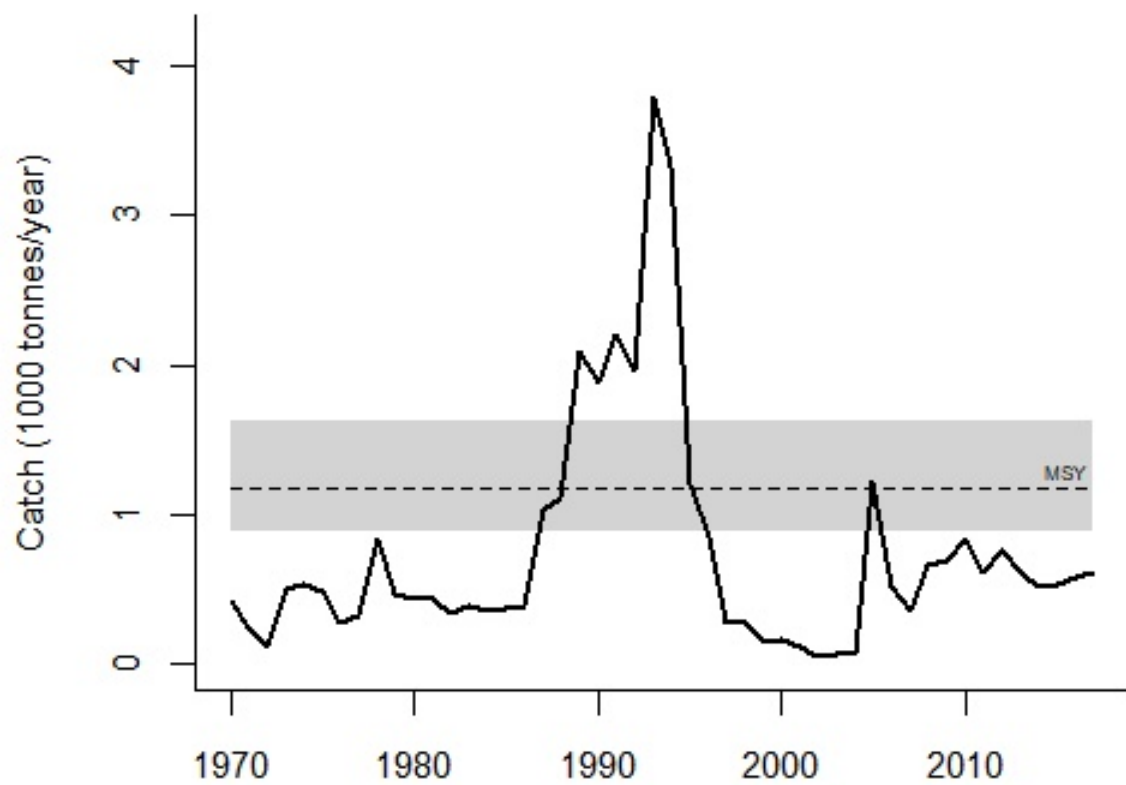**Stock size**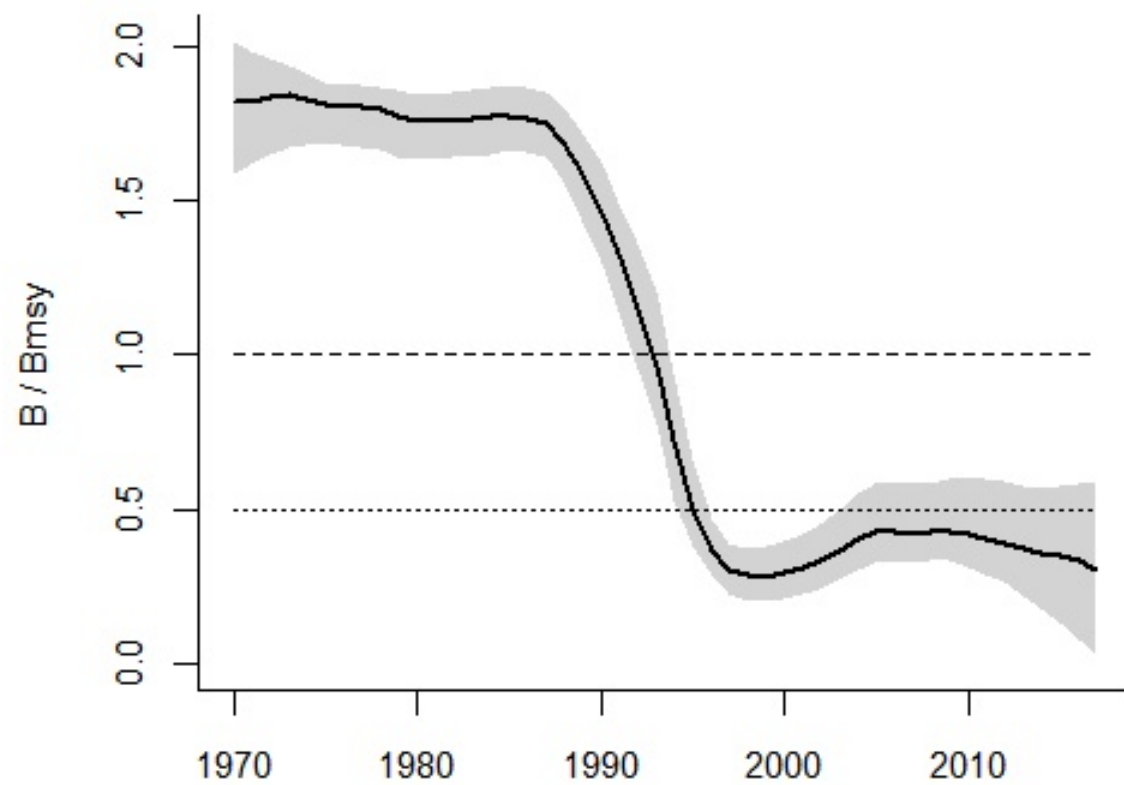**Exploitation**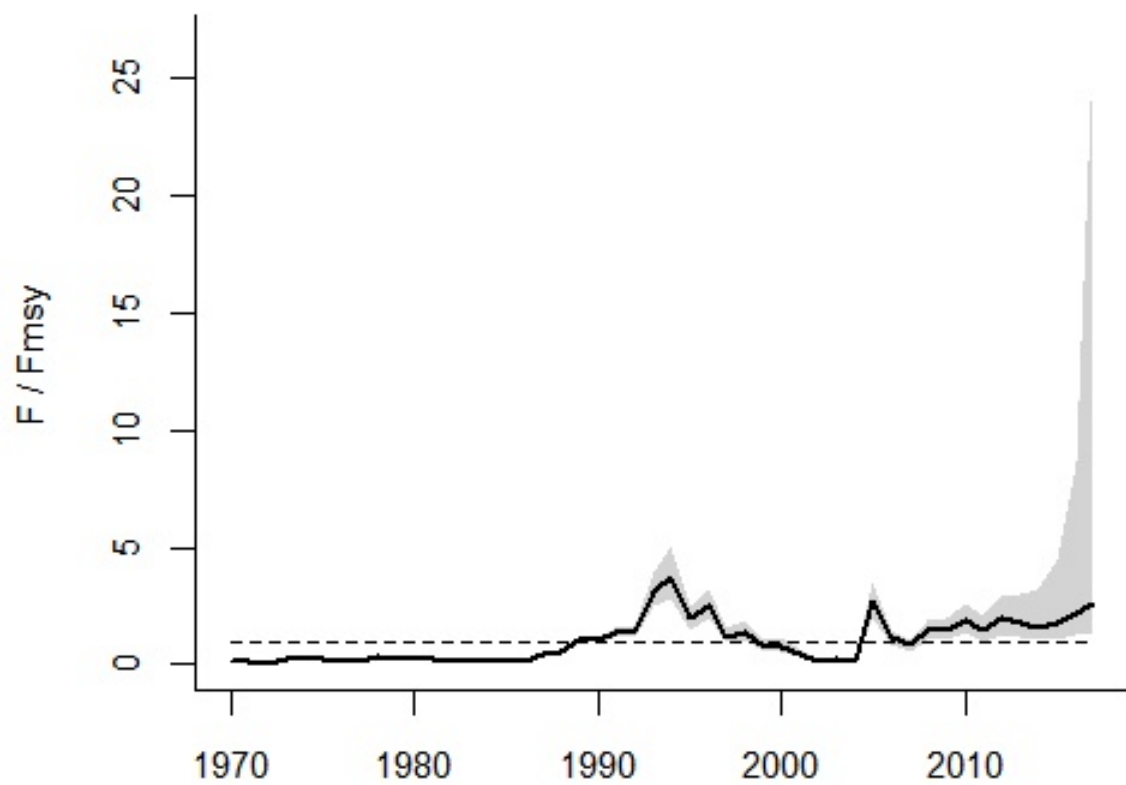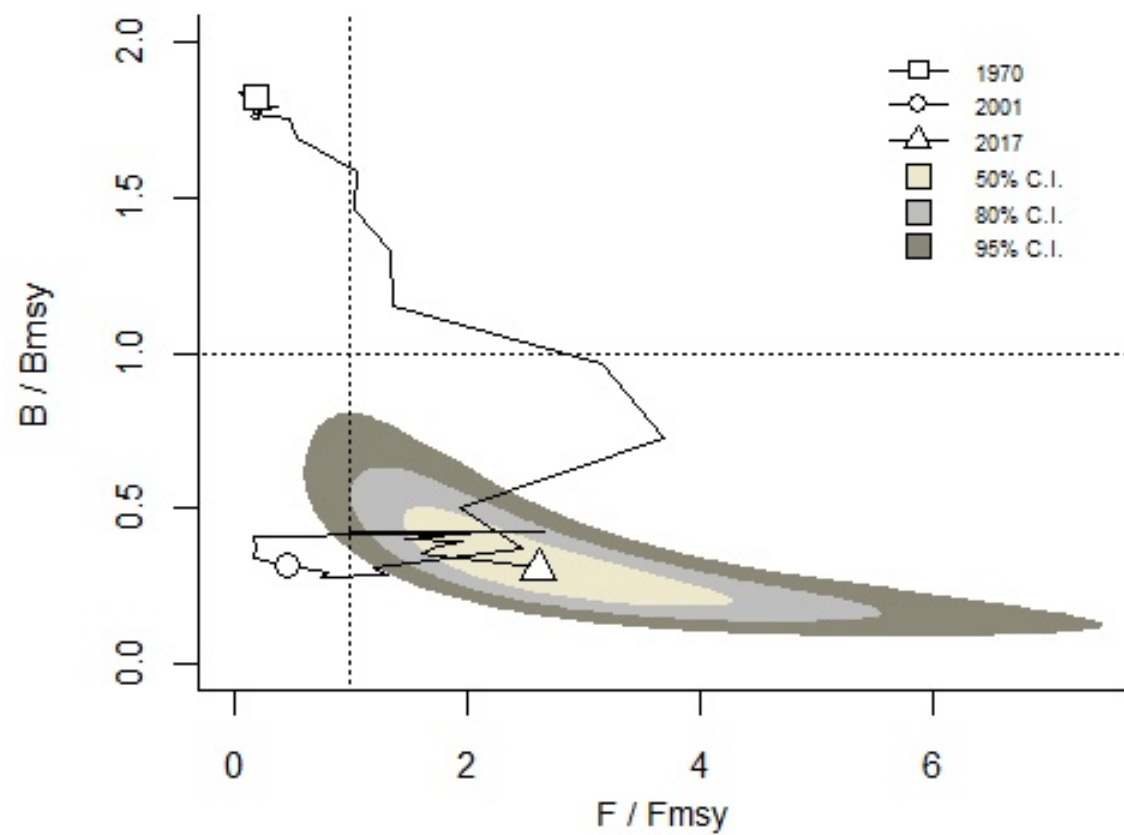



**A: Catch Picarel\_BS**

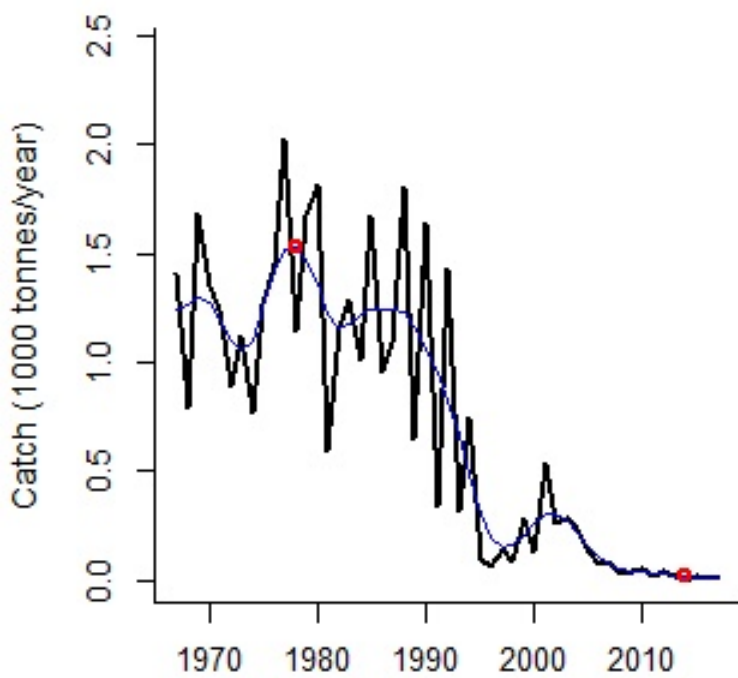

**B: Finding viable r-k**

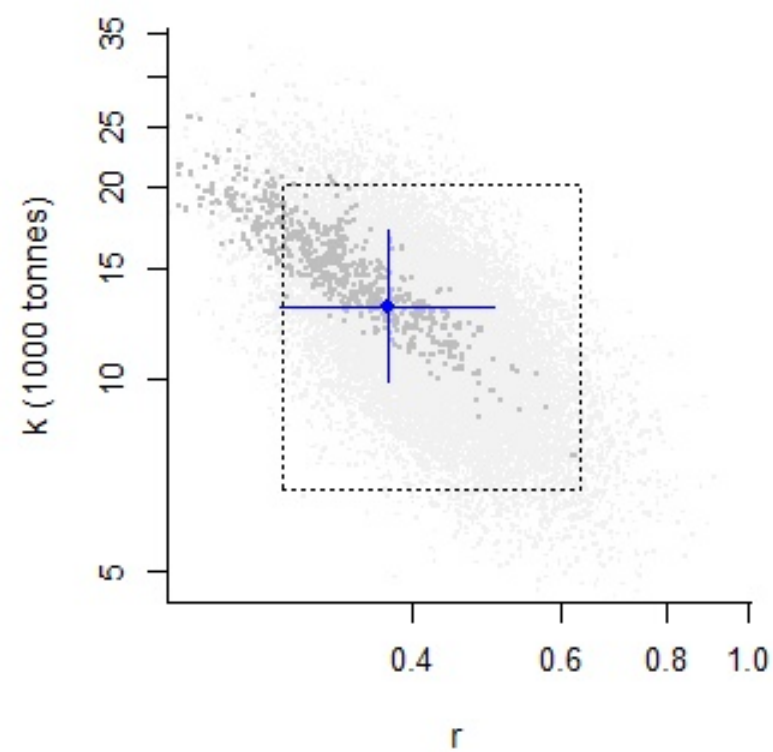

**C: Analysis of viable r-k**

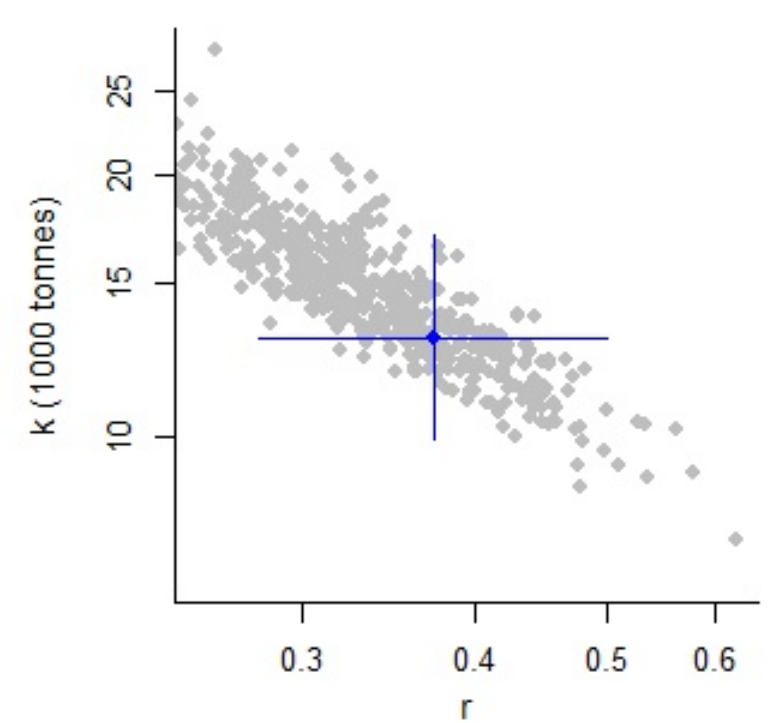

**D: Stock size**

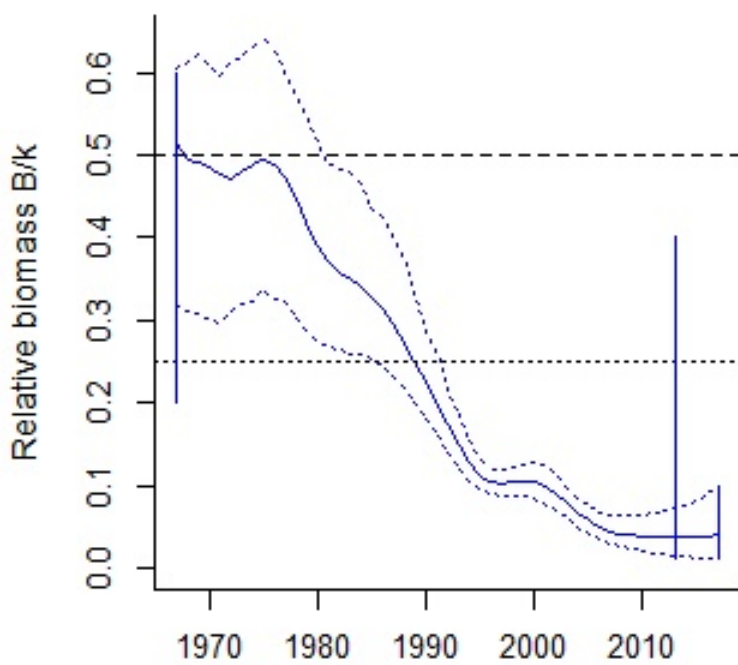

**E: Exploitation rate**

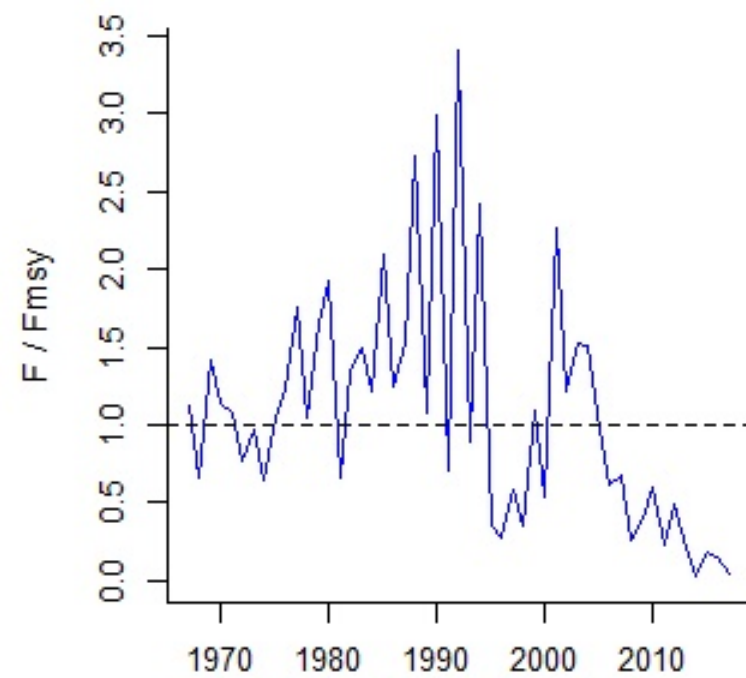

**F: Equilibrium curve**

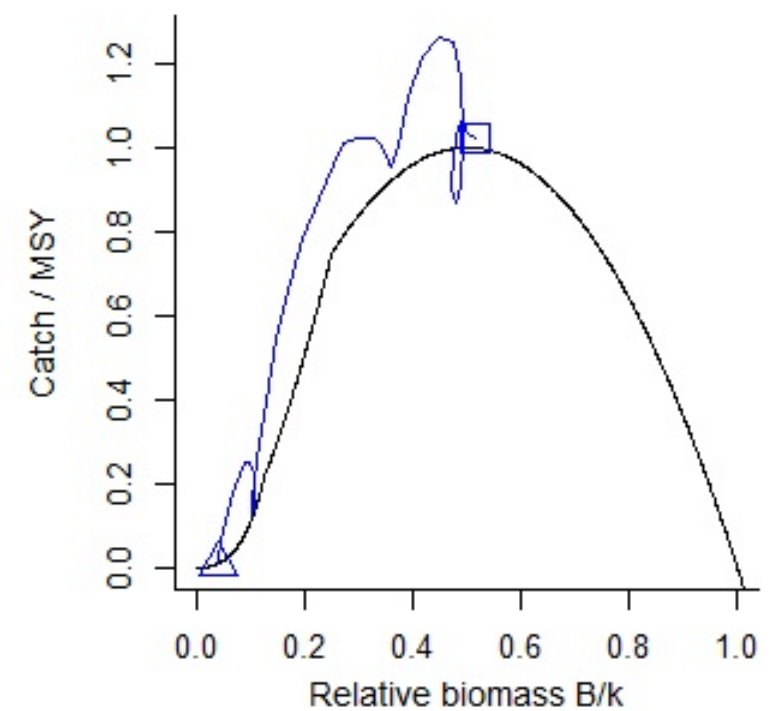



**Catch**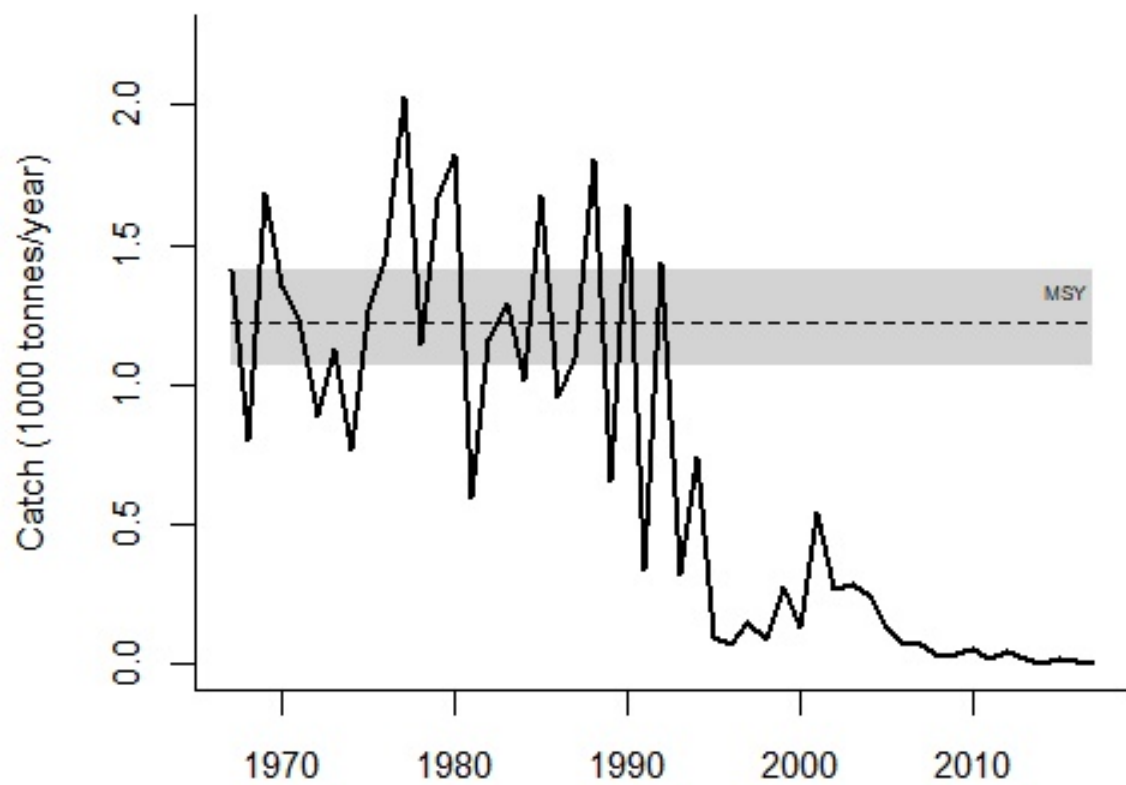**Stock size**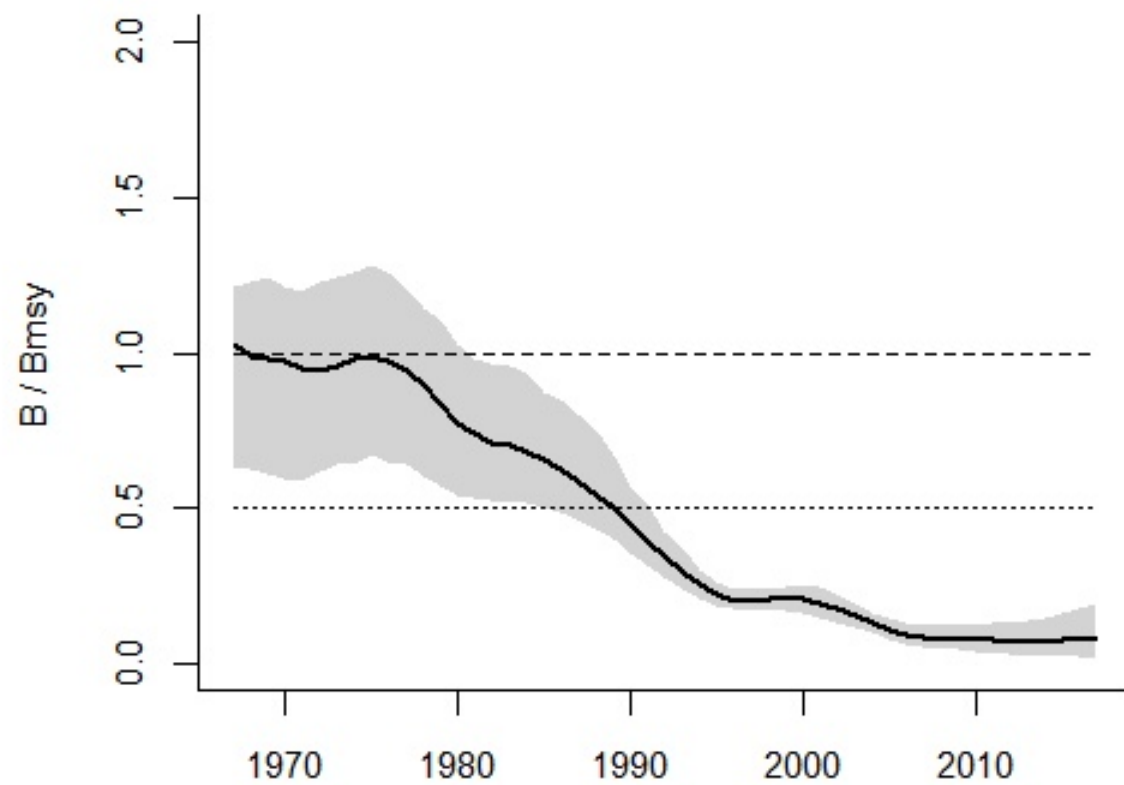**Exploitation**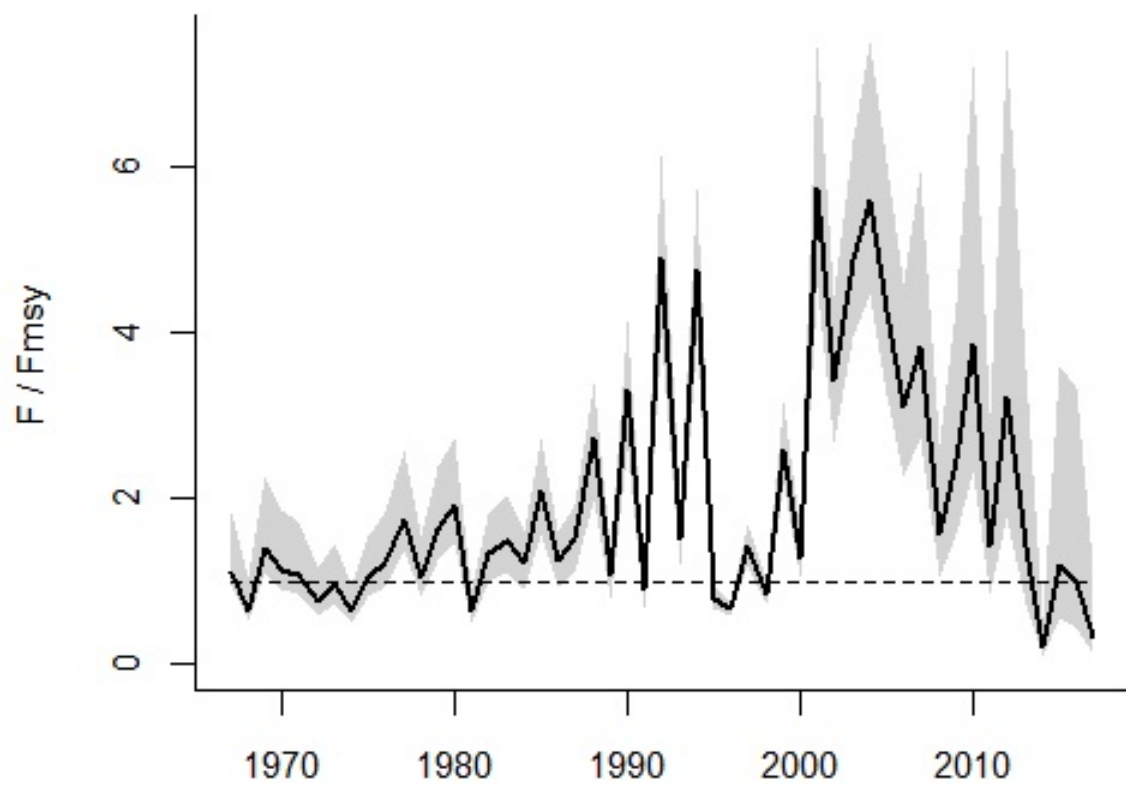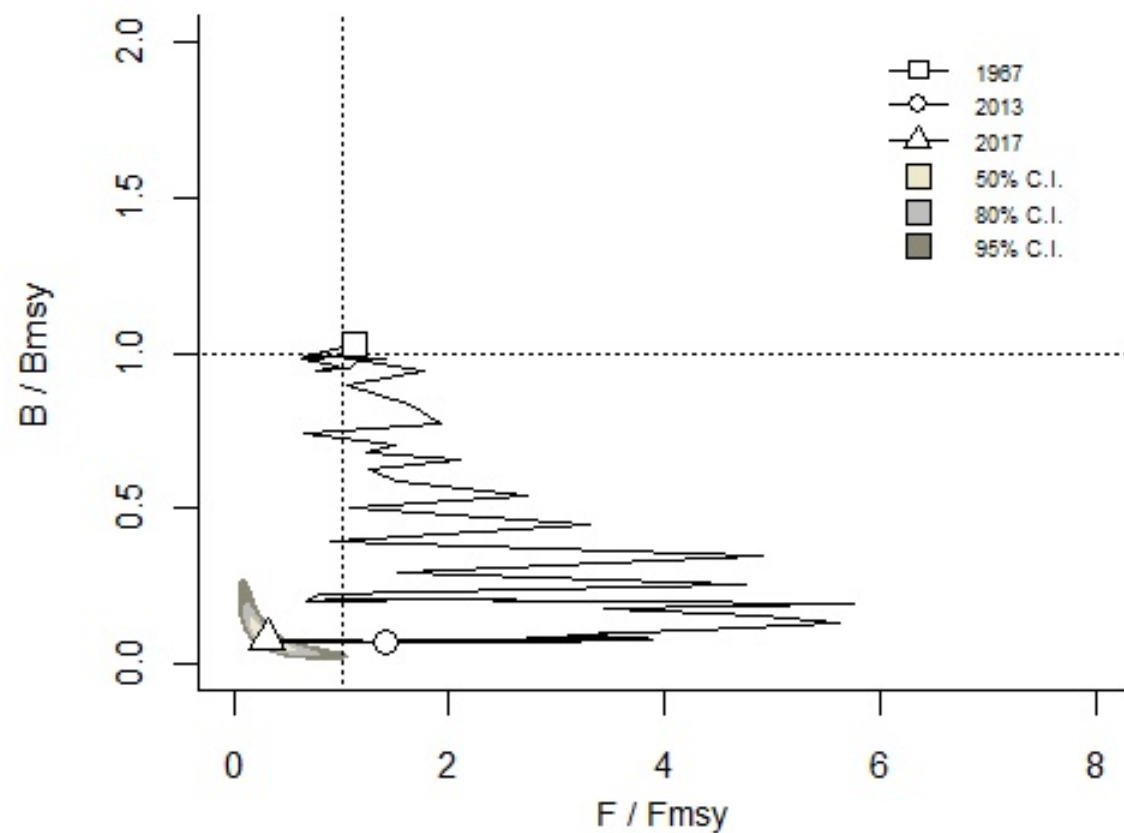

**A: Catch Bluefish\_BS**

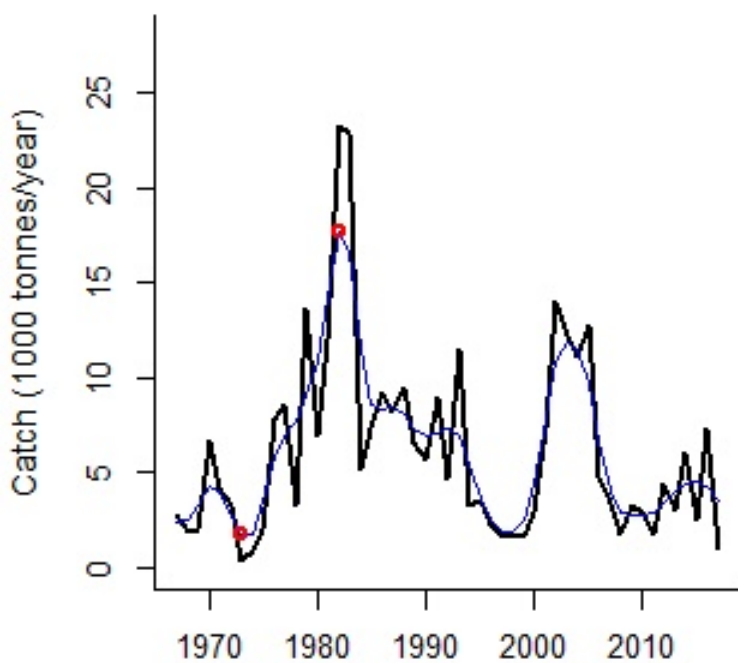

**B: Finding viable r-k**

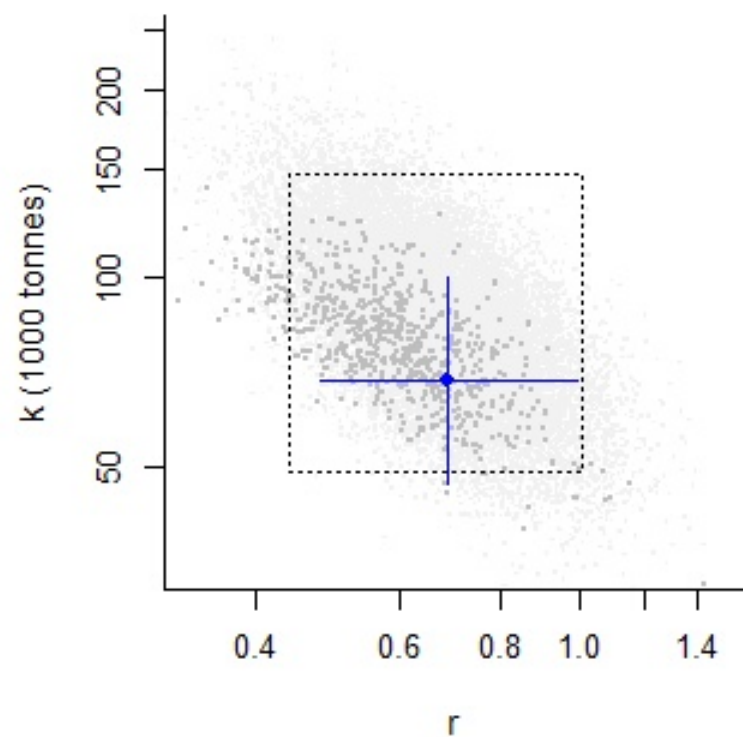

**C: Analysis of viable r-k**

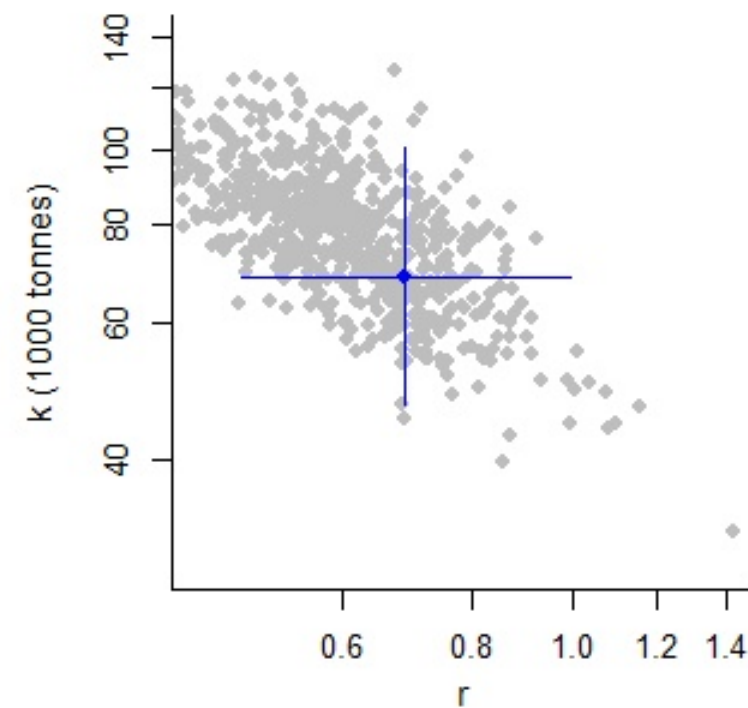

**D: Stock size**

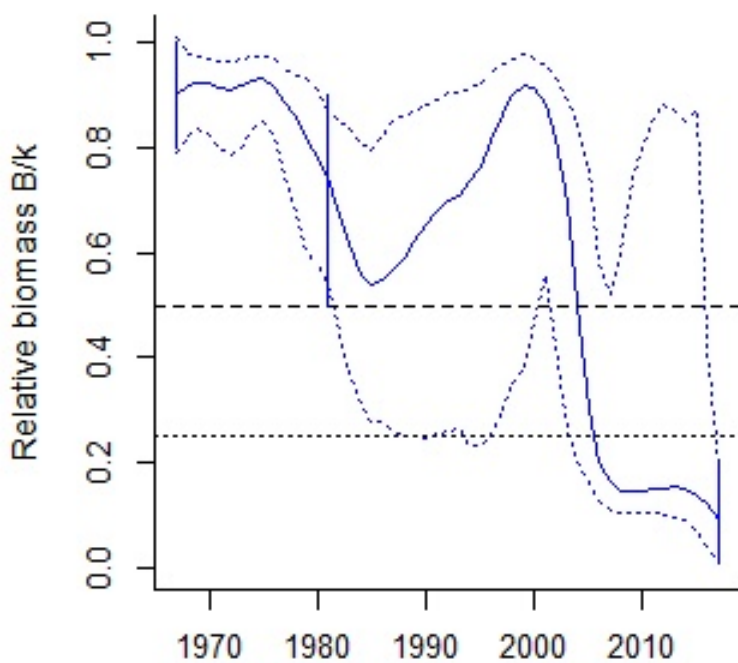

**E: Exploitation rate**

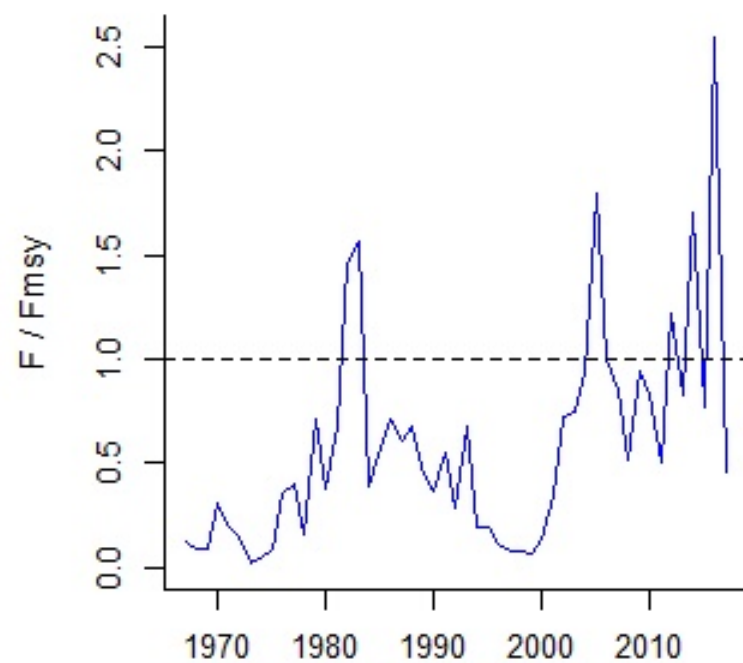

**F: Equilibrium curve**

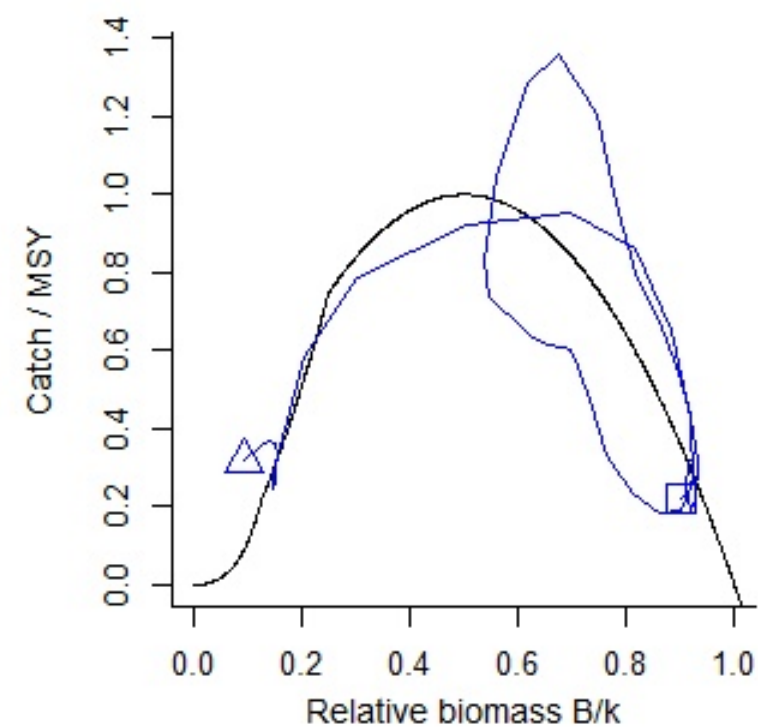

**Catch**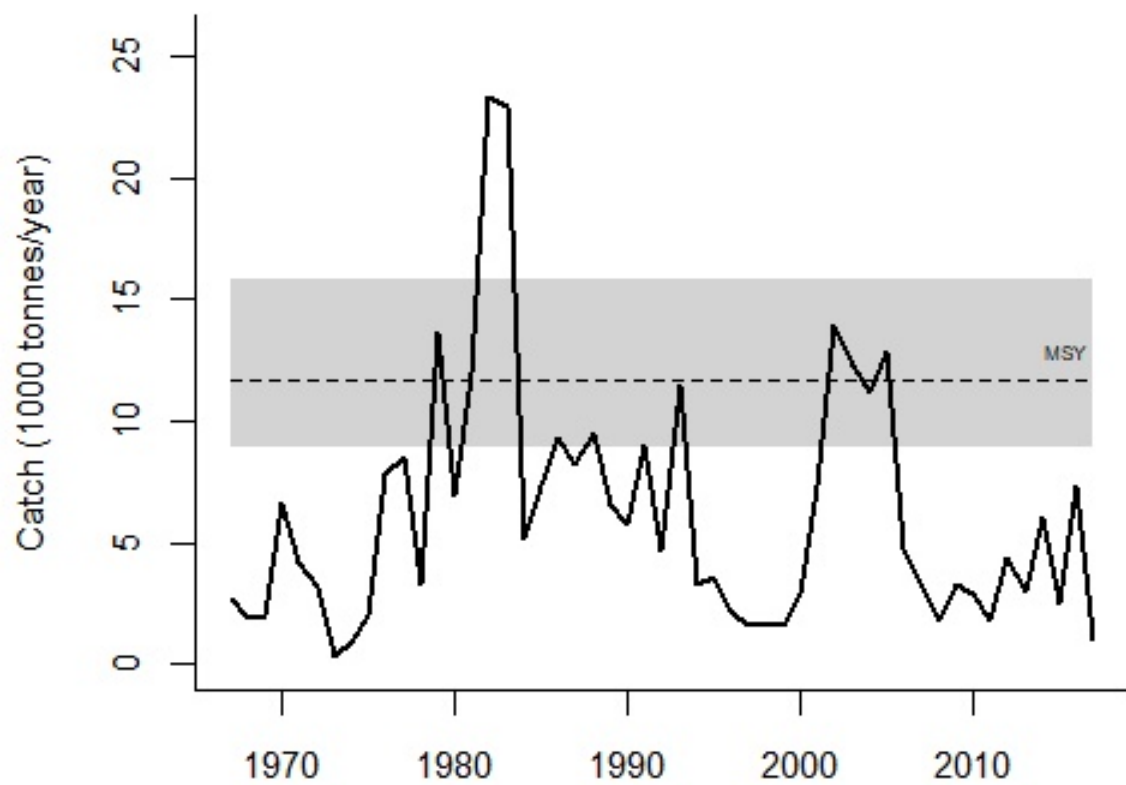**Stock size**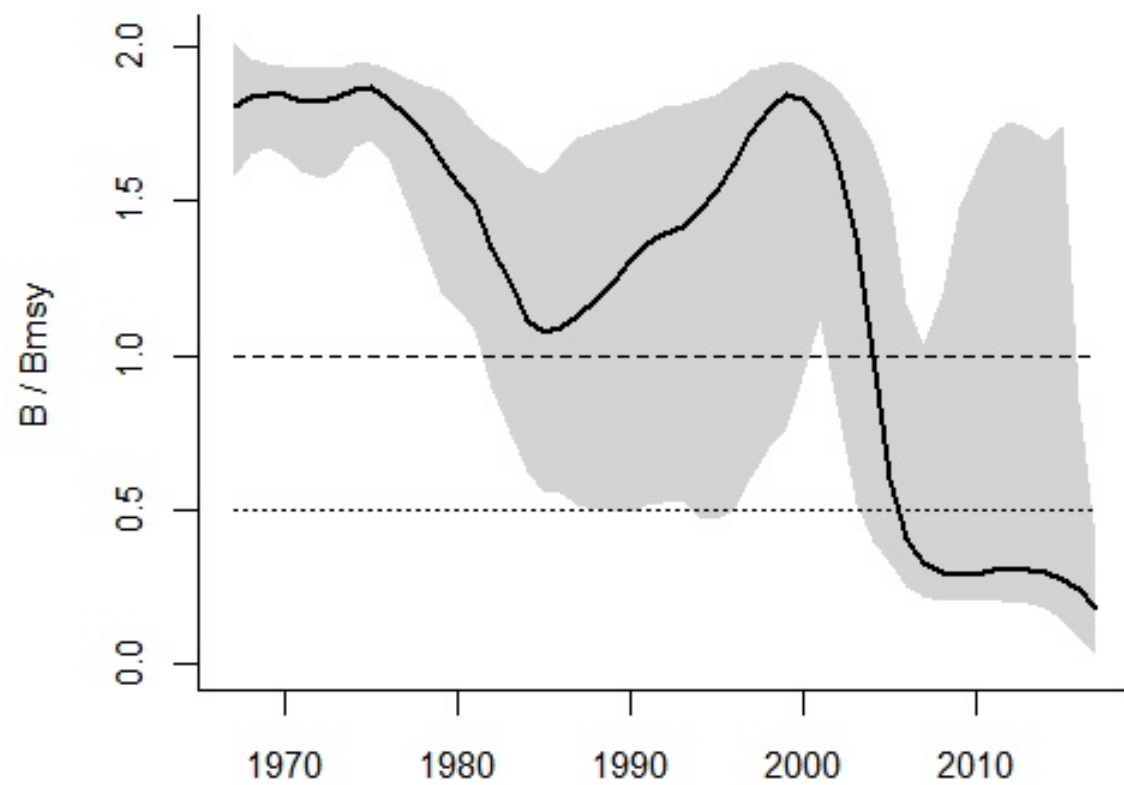**Exploitation**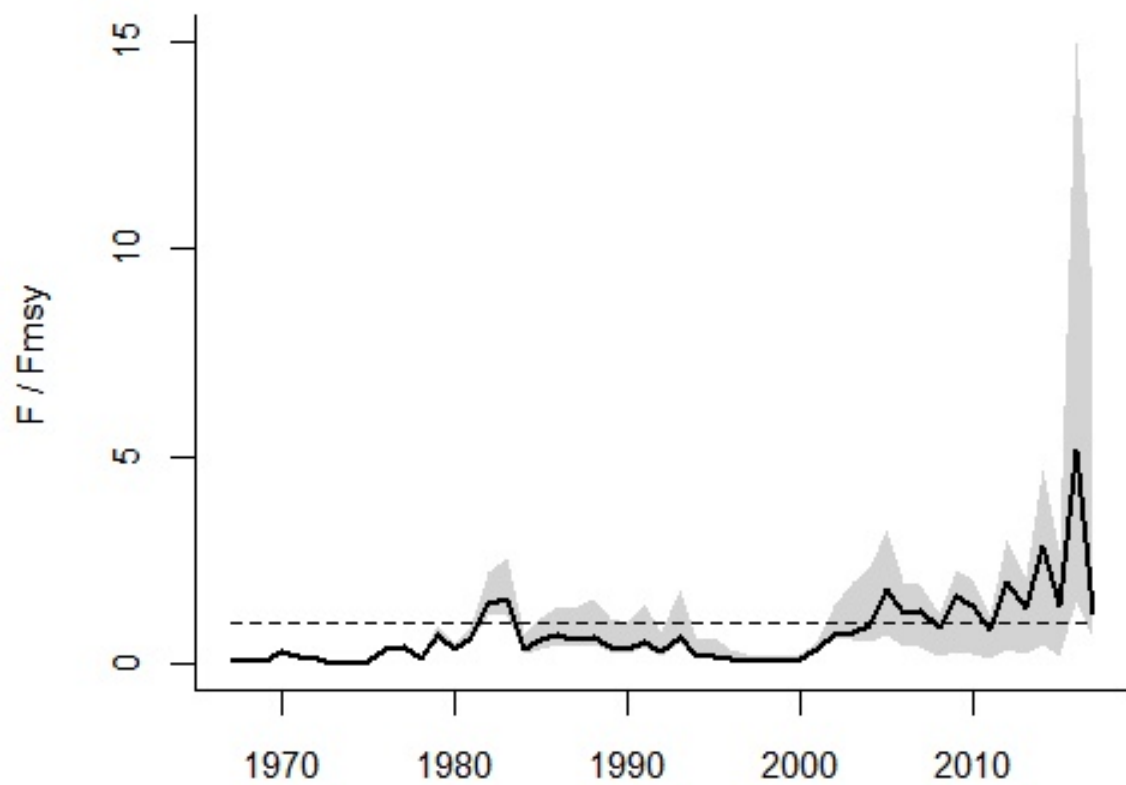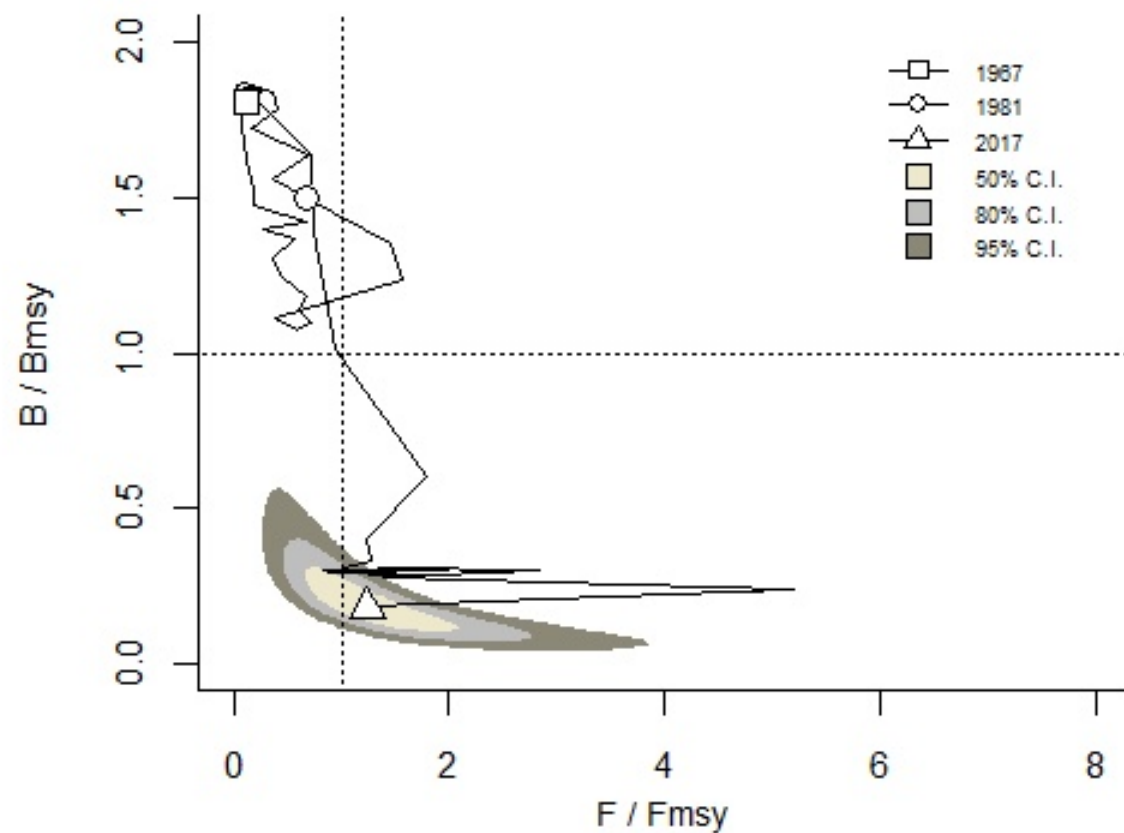

**A: Catch Bonito\_BS**

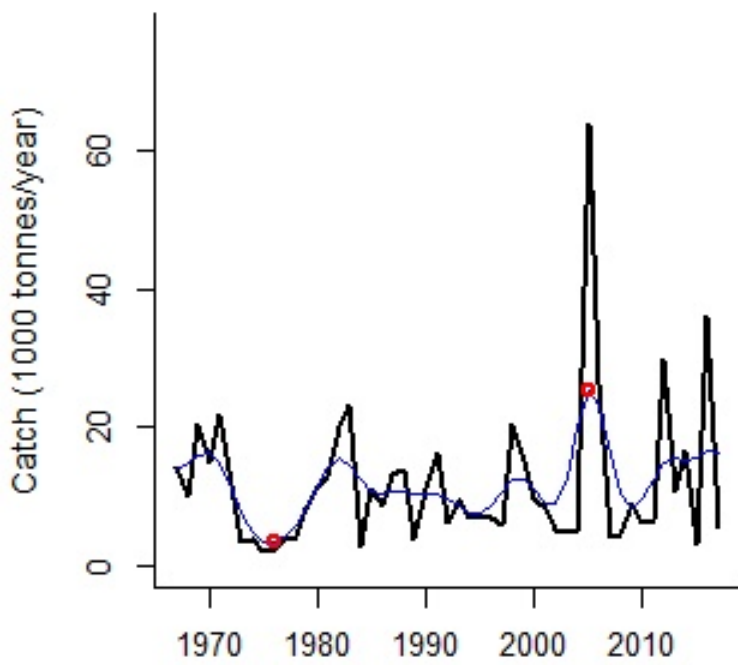

**B: Finding viable r-k**

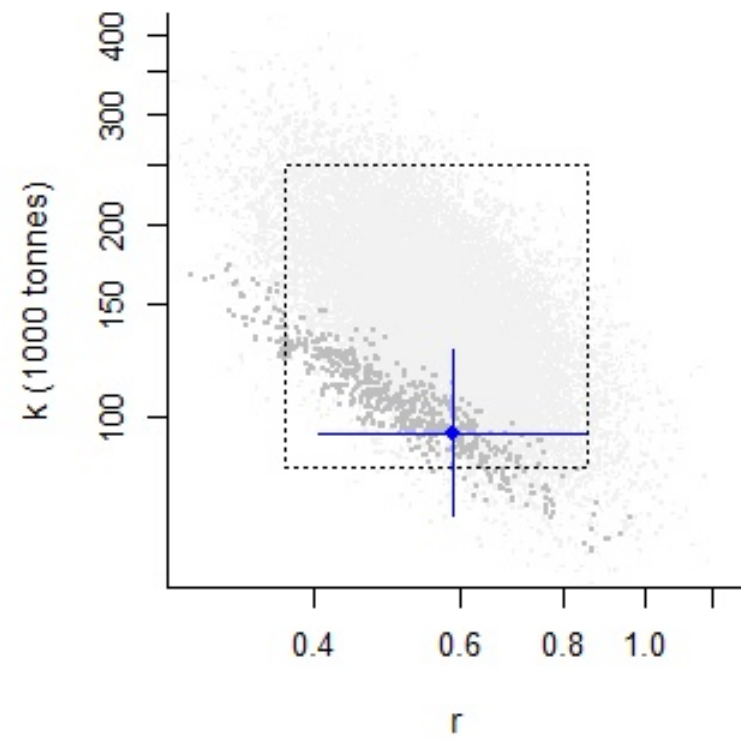

**C: Analysis of viable r-k**

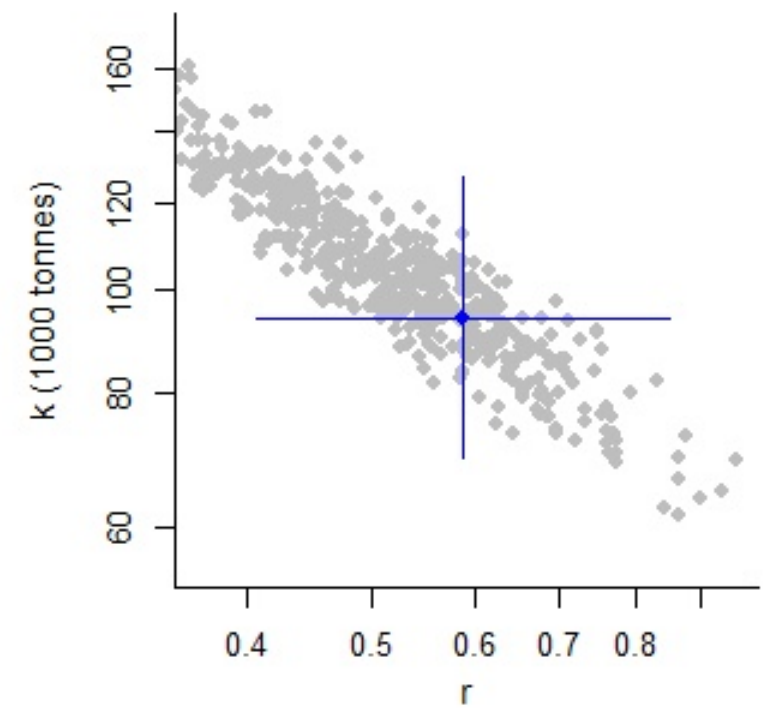

**D: Stock size**

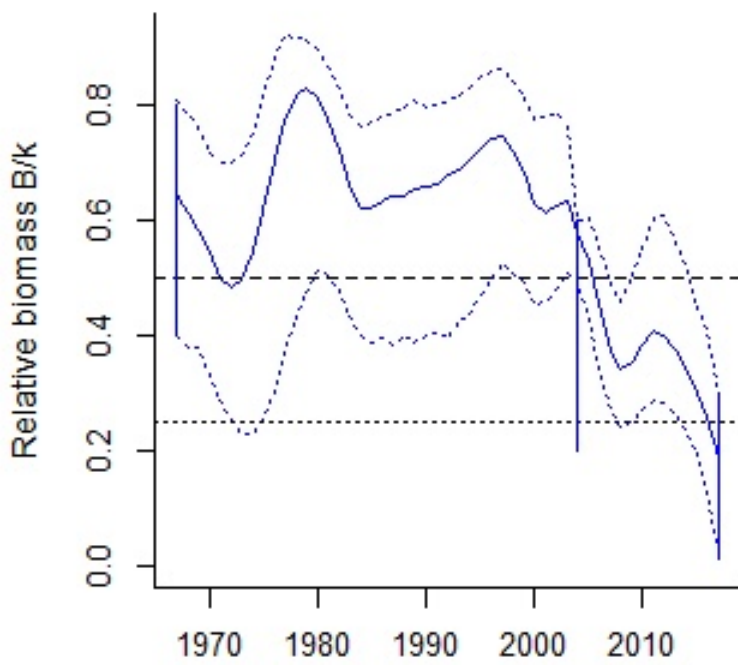

**E: Exploitation rate**

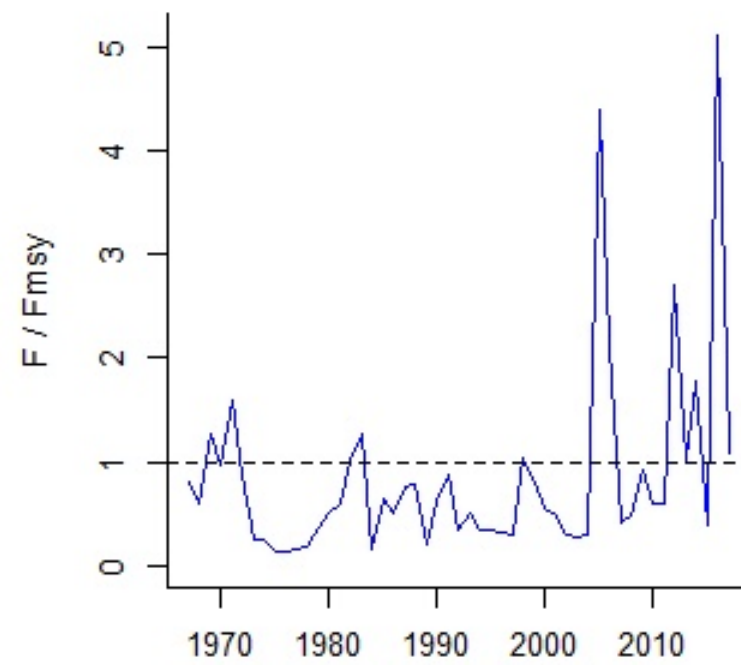

**F: Equilibrium curve**

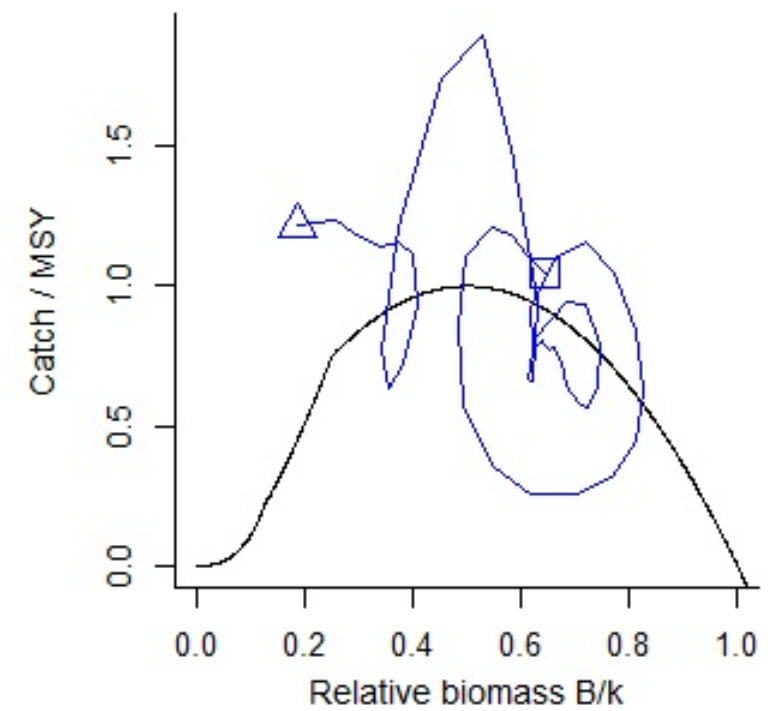



**Catch**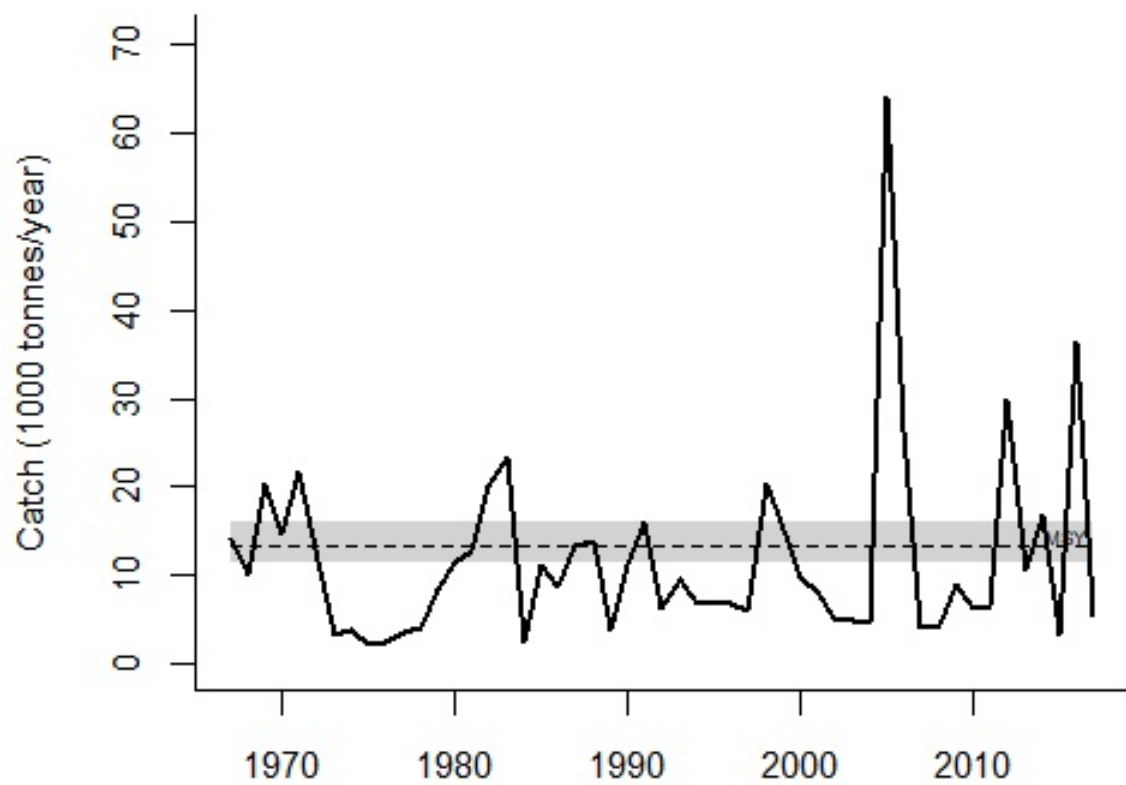**Stock size**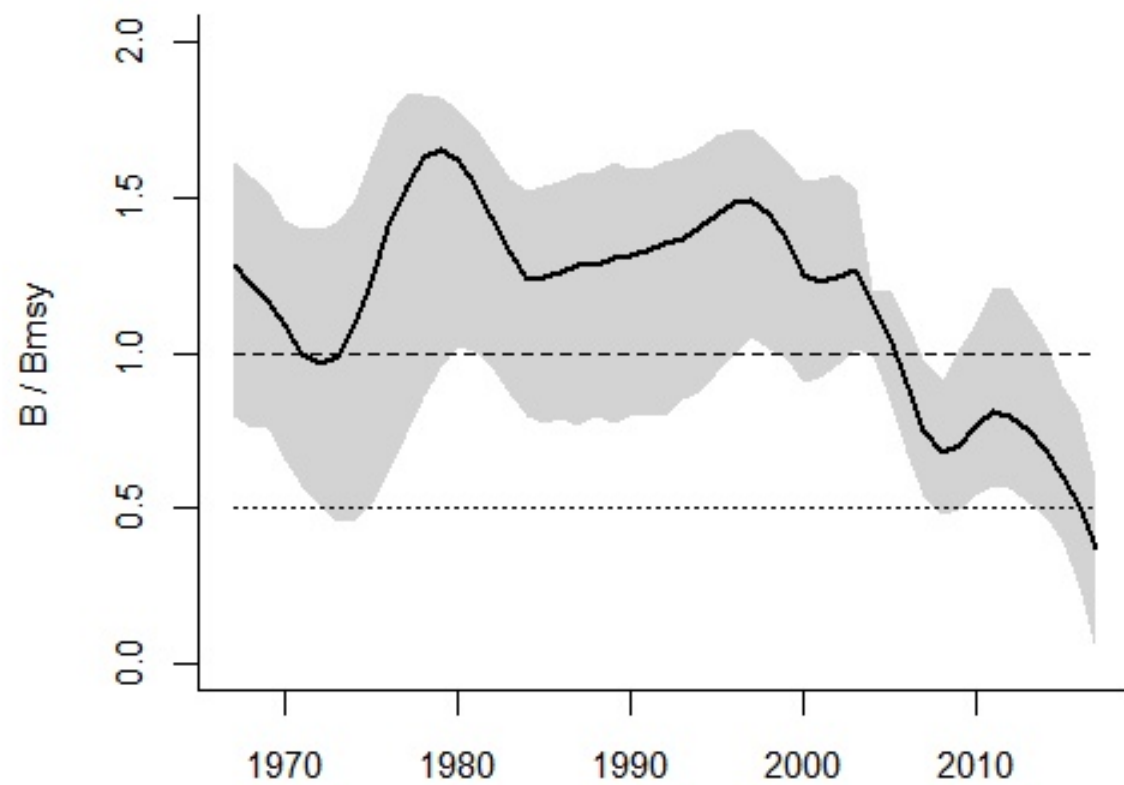**Exploitation**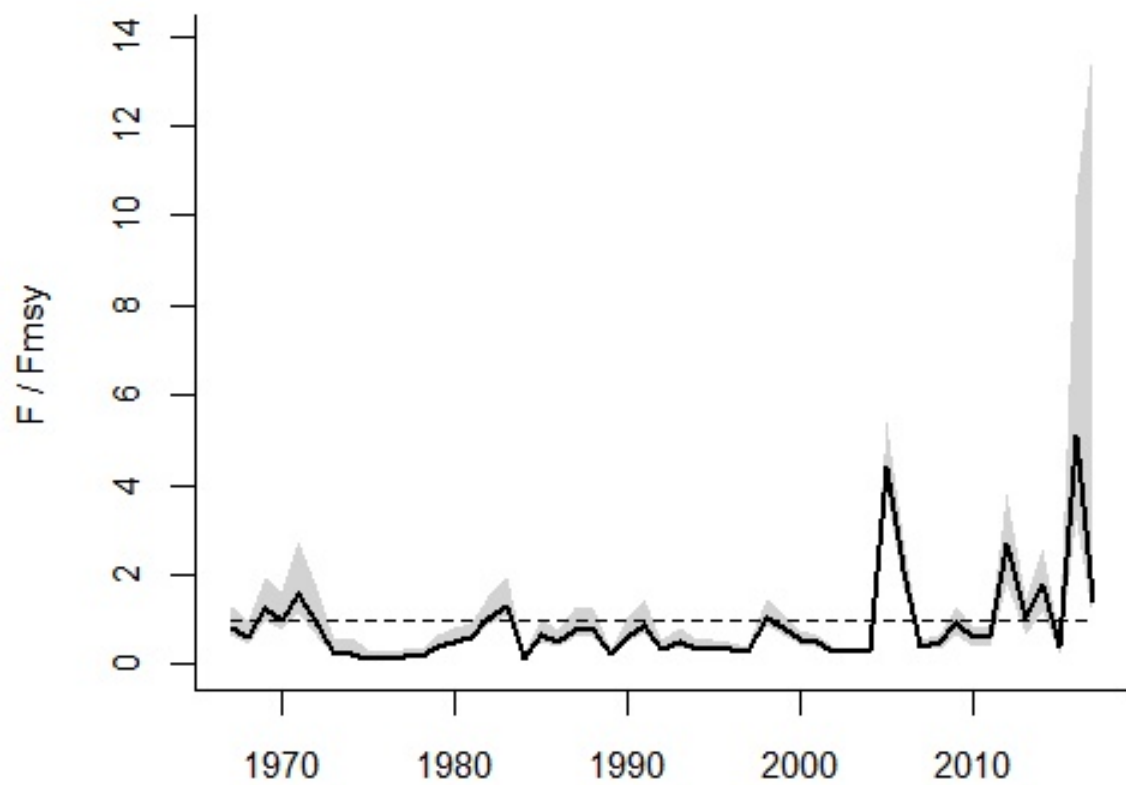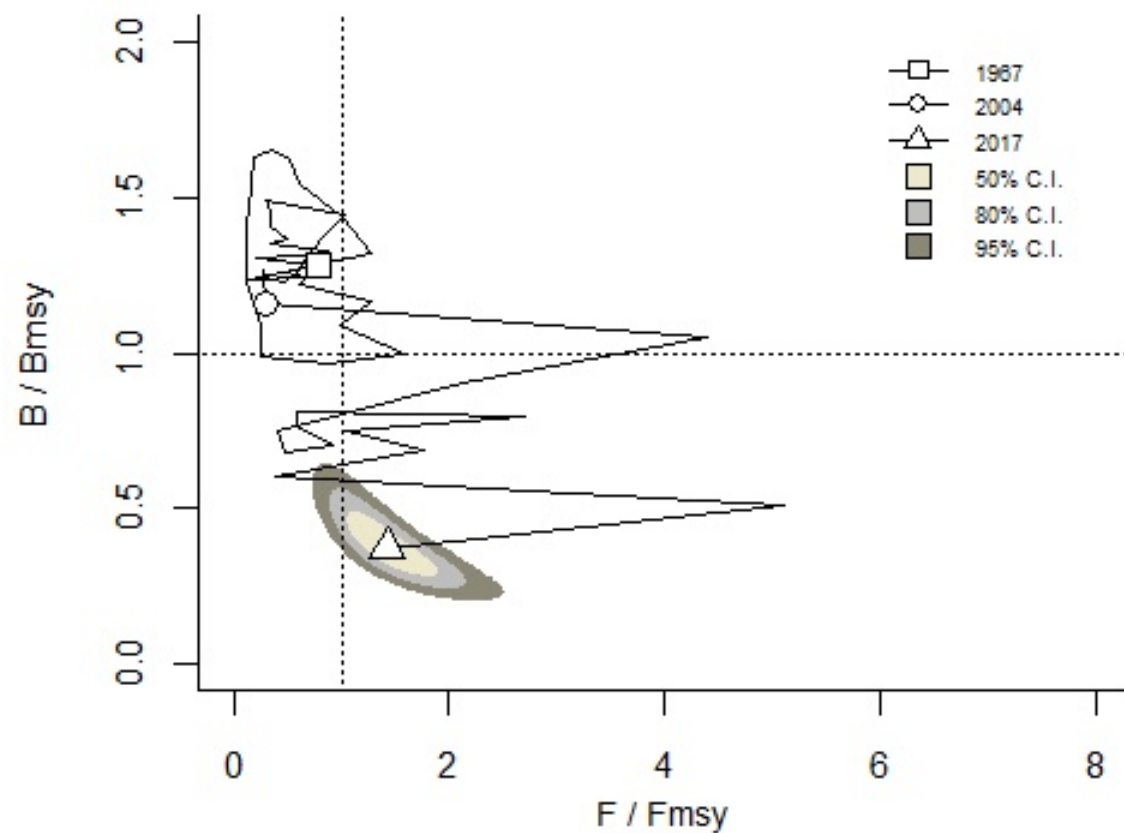



**A: Catch Whiting\_BS**

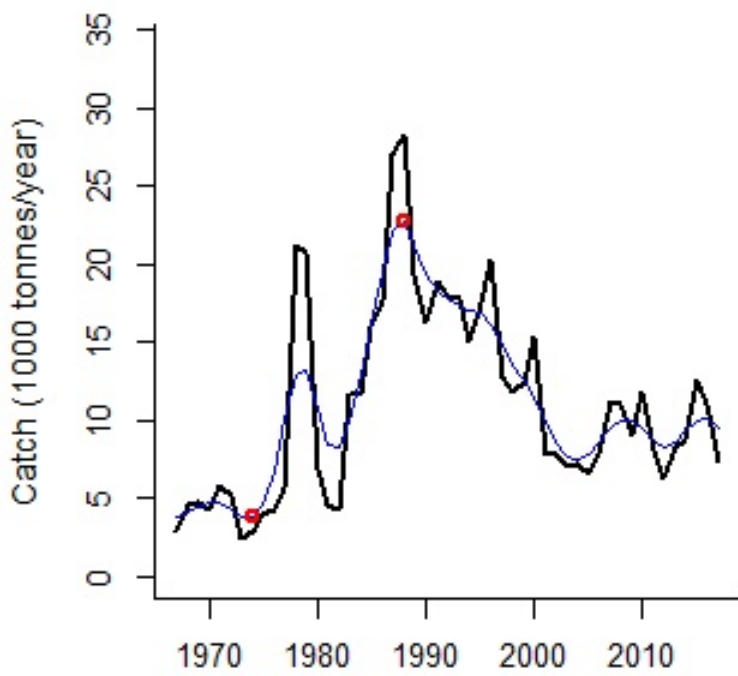

**B: Finding viable r-k**

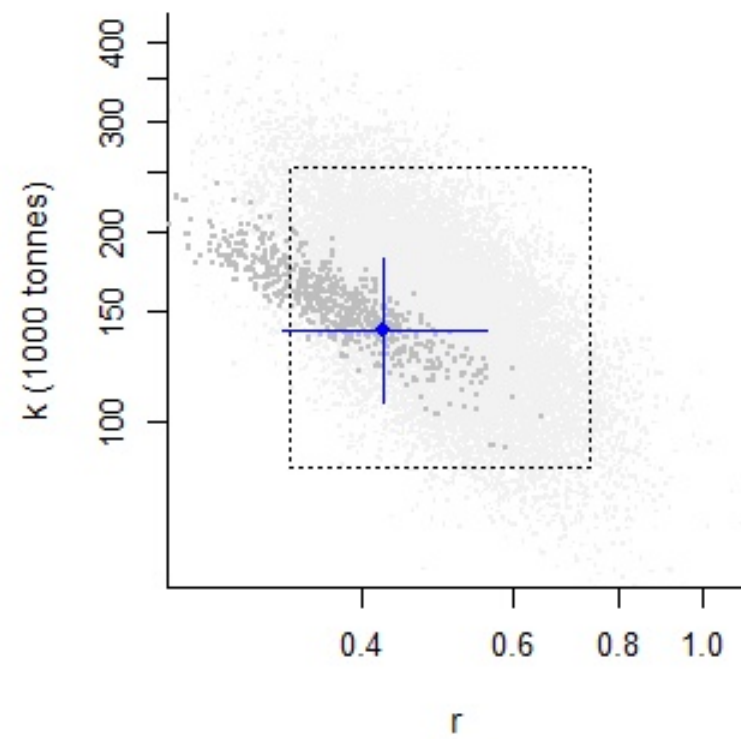

**C: Analysis of viable r-k**

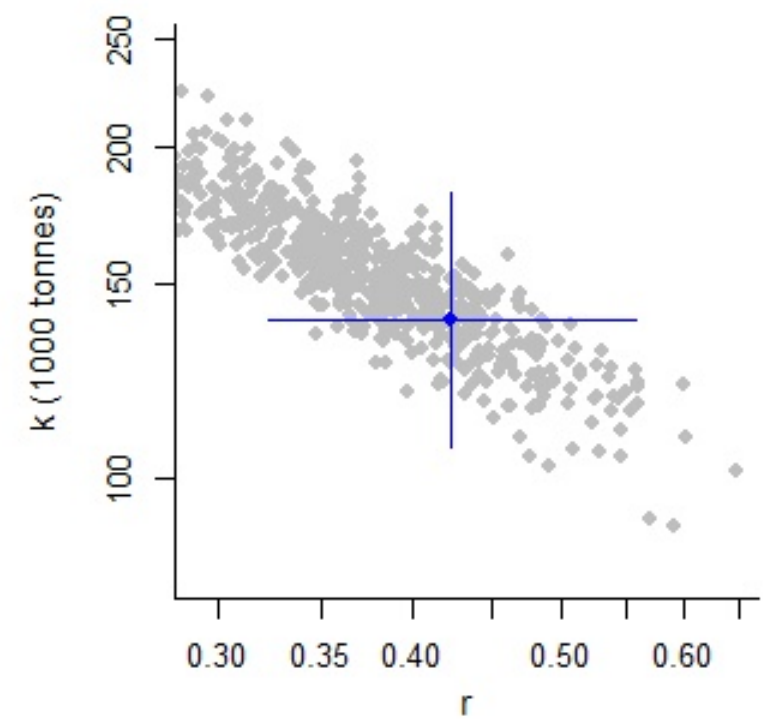

**D: Stock size**

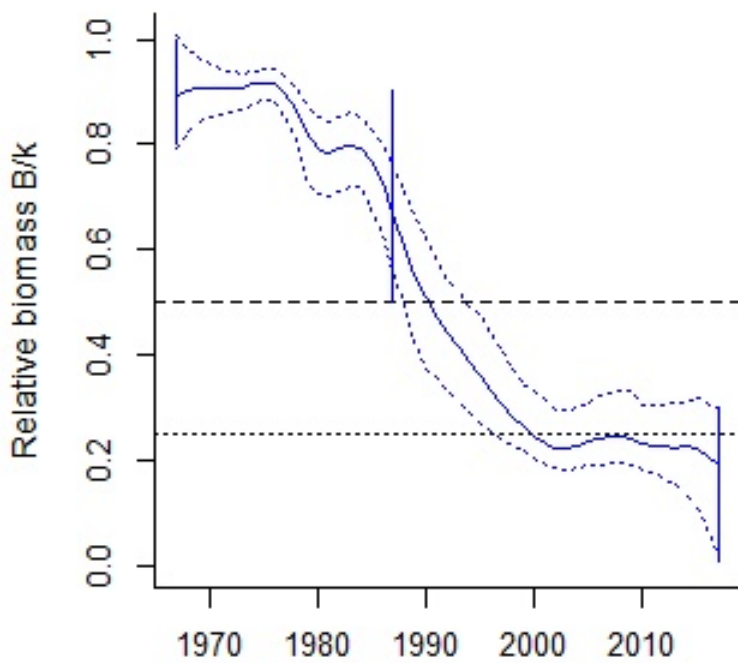

**E: Exploitation rate**

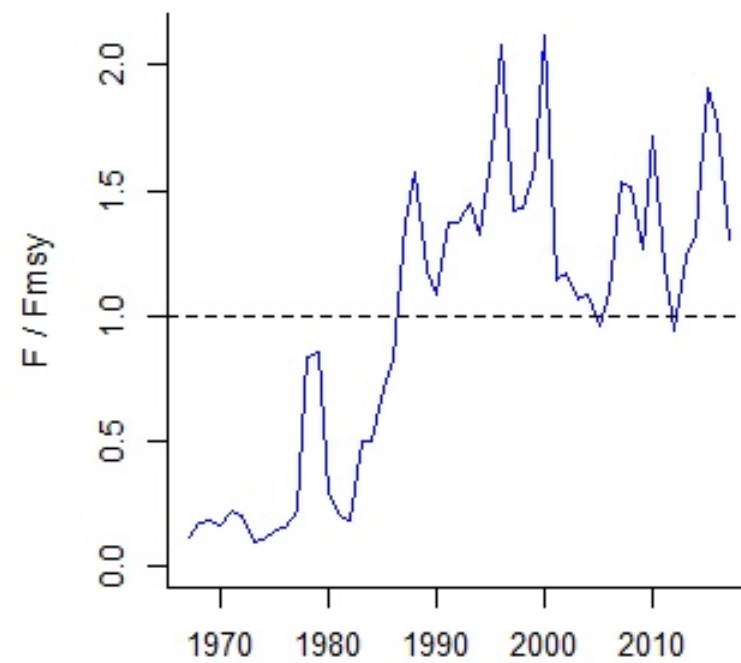

**F: Equilibrium curve**

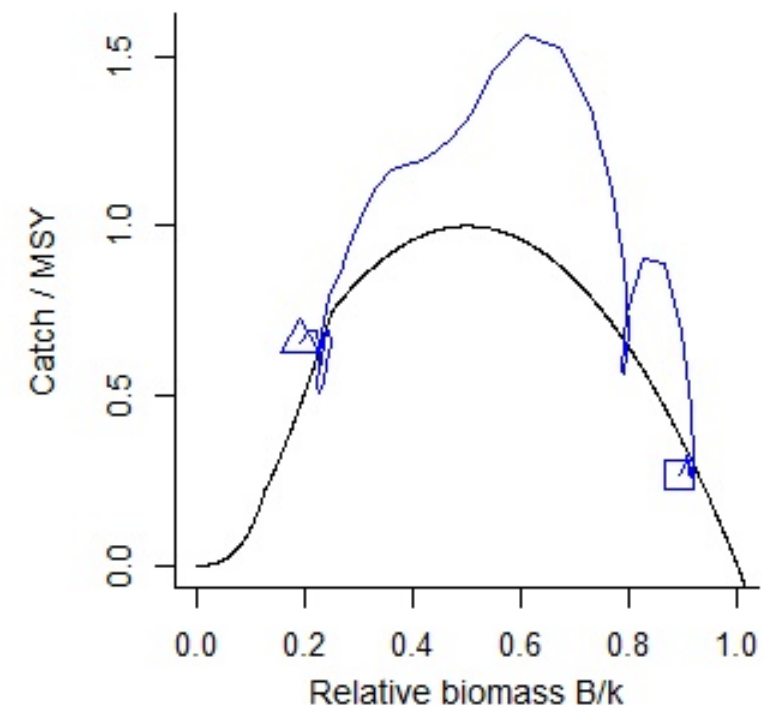

**Catch**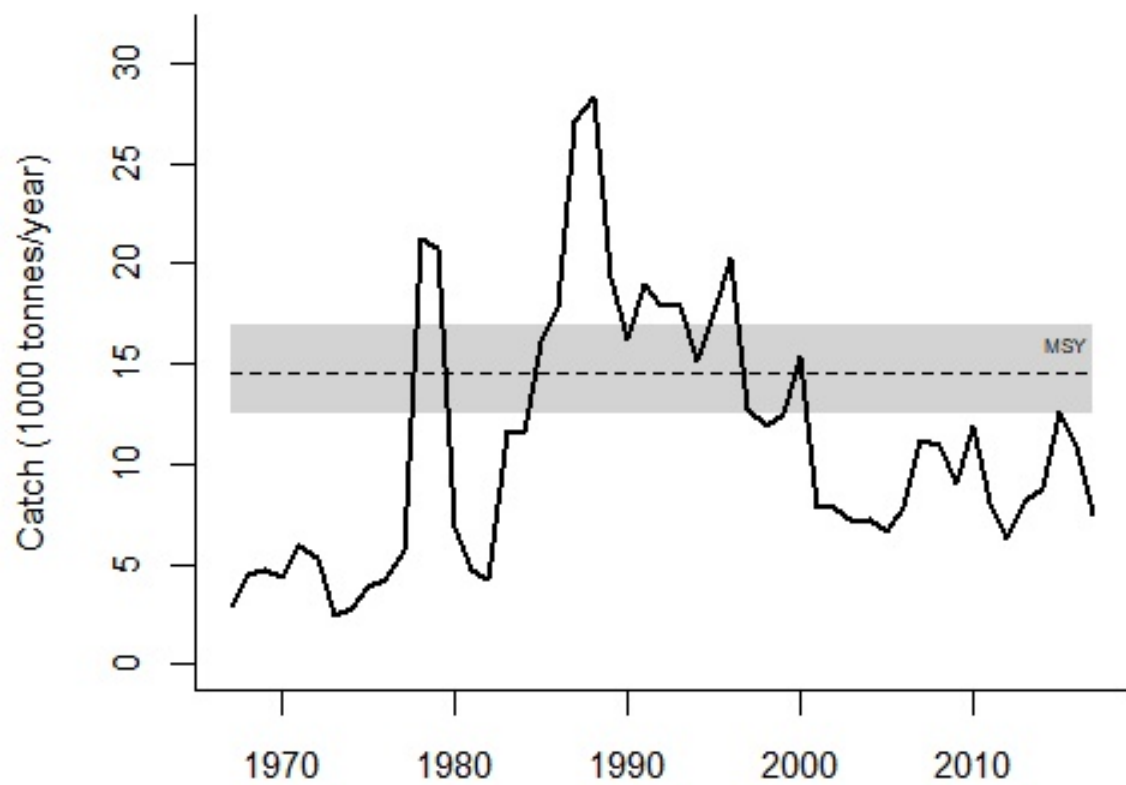**Stock size**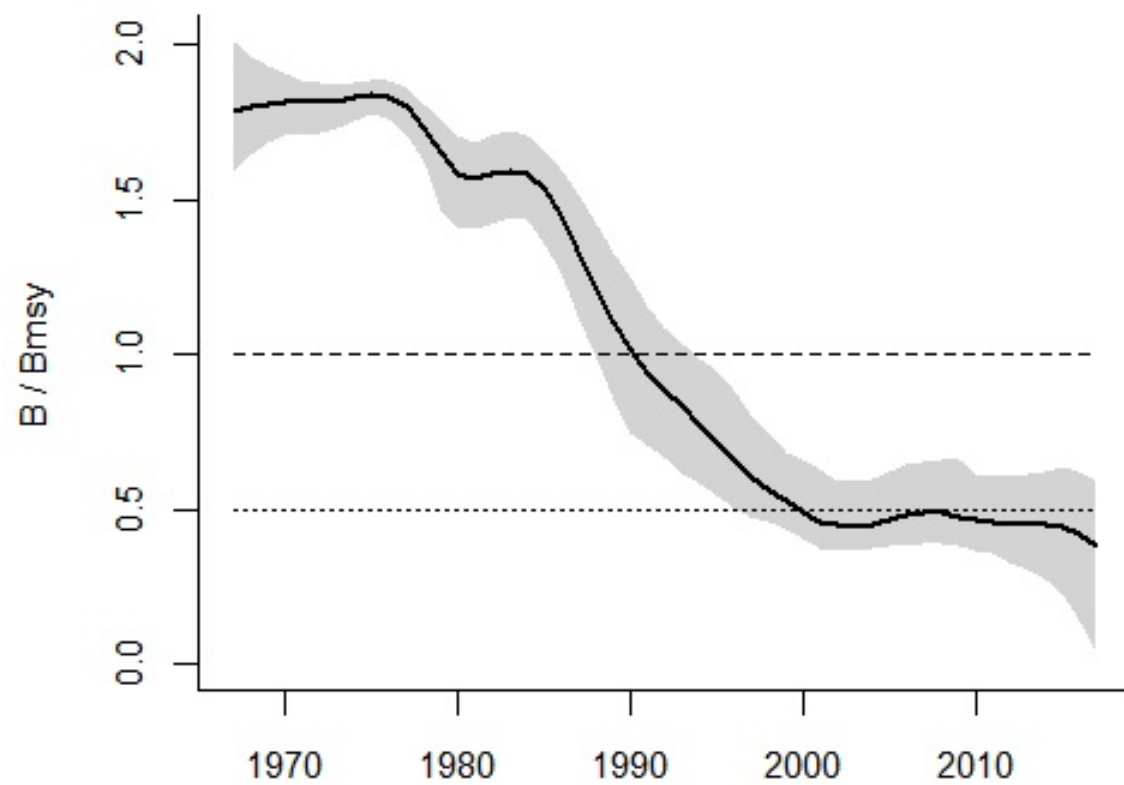**Exploitation**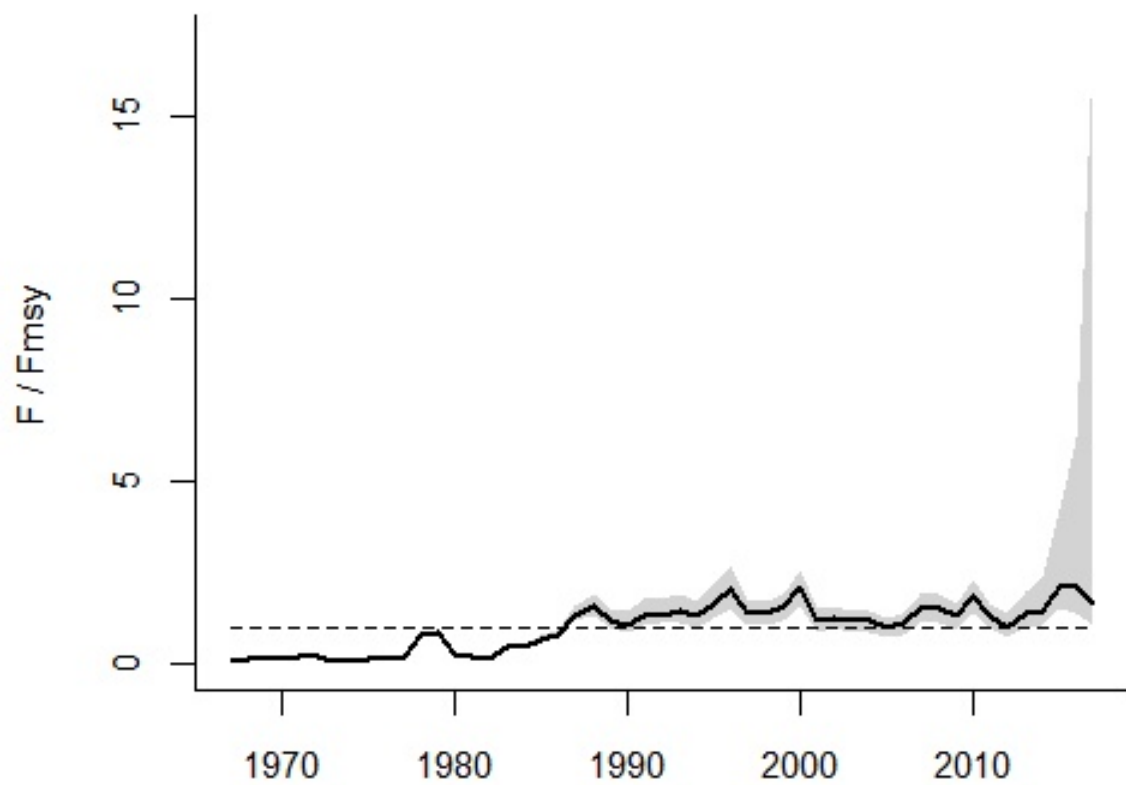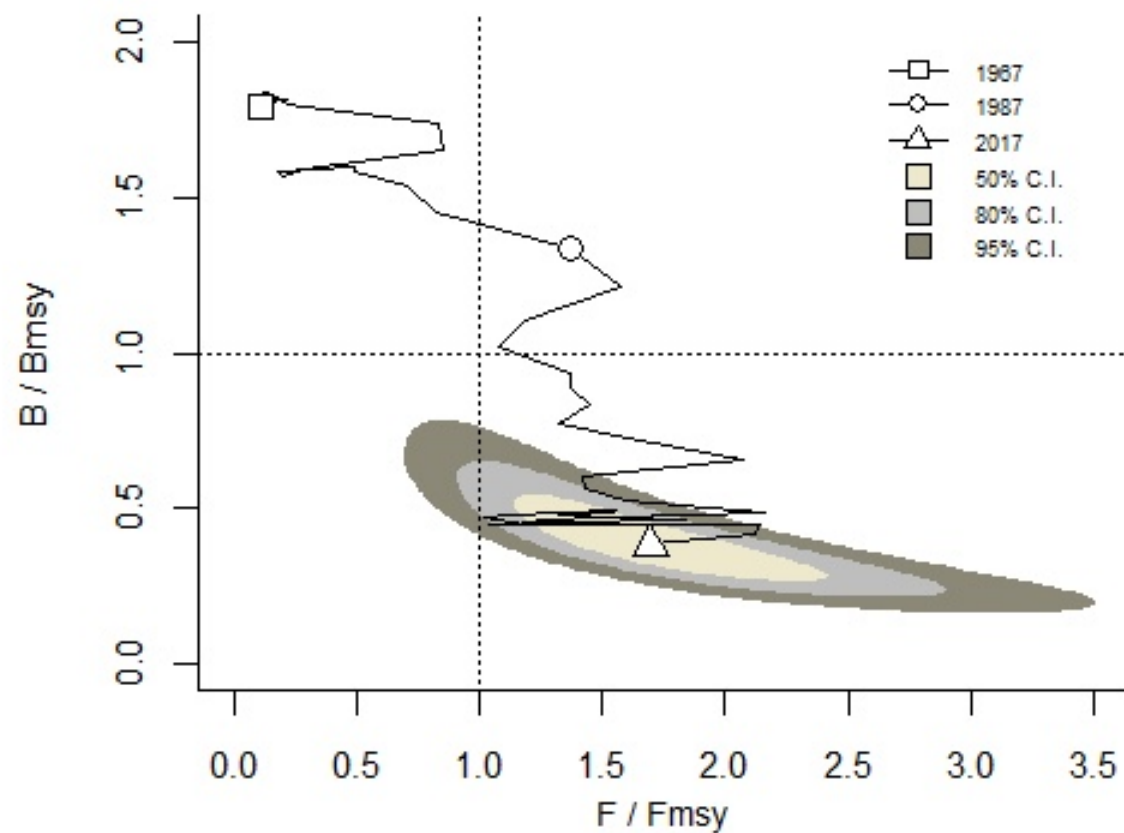

**A: Catch Garfish\_BS**

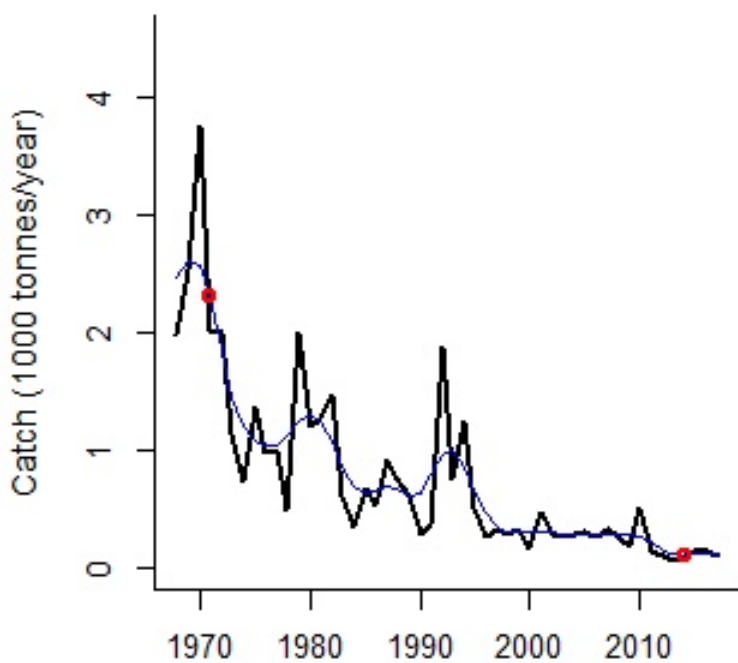

**B: Finding viable r-k**

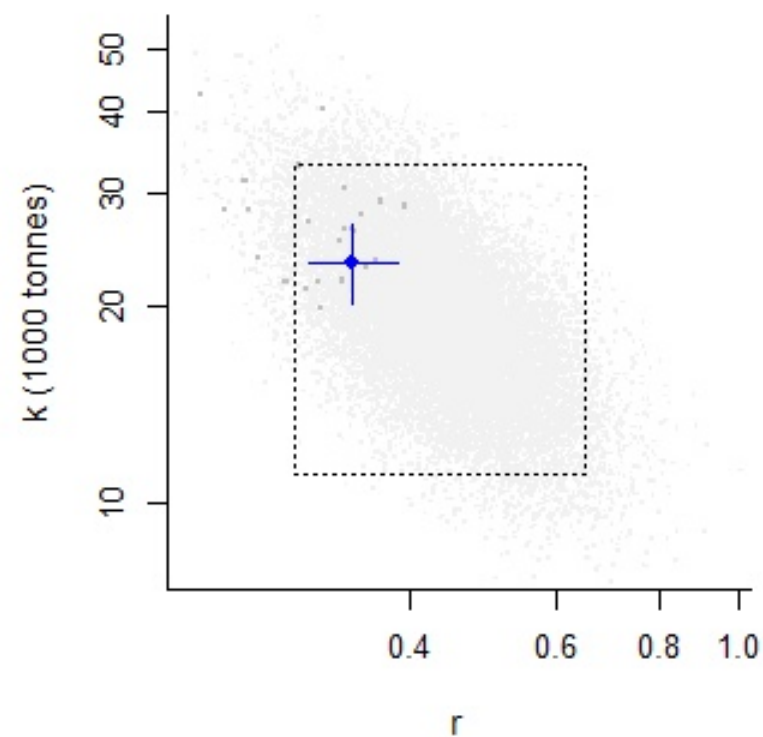

**C: Analysis of viable r-k**

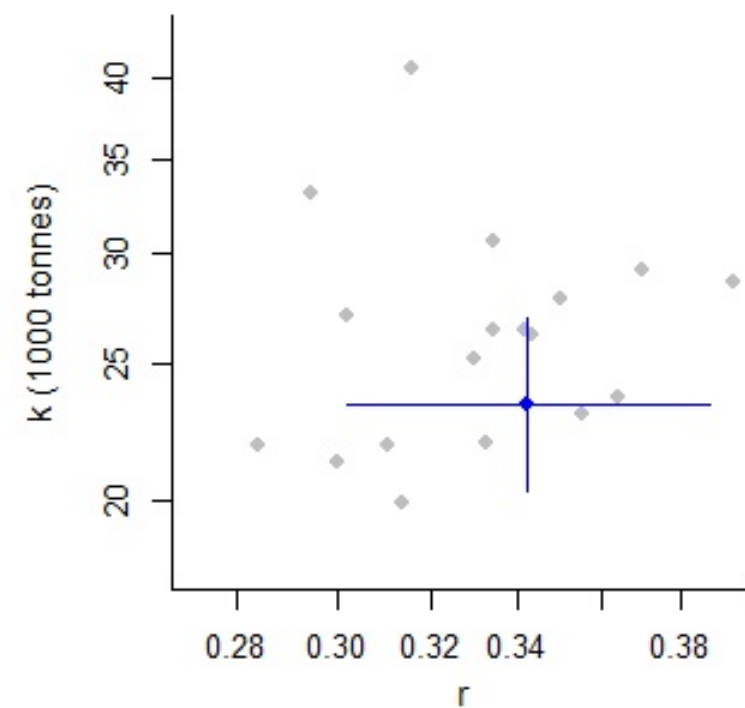

**D: Stock size**

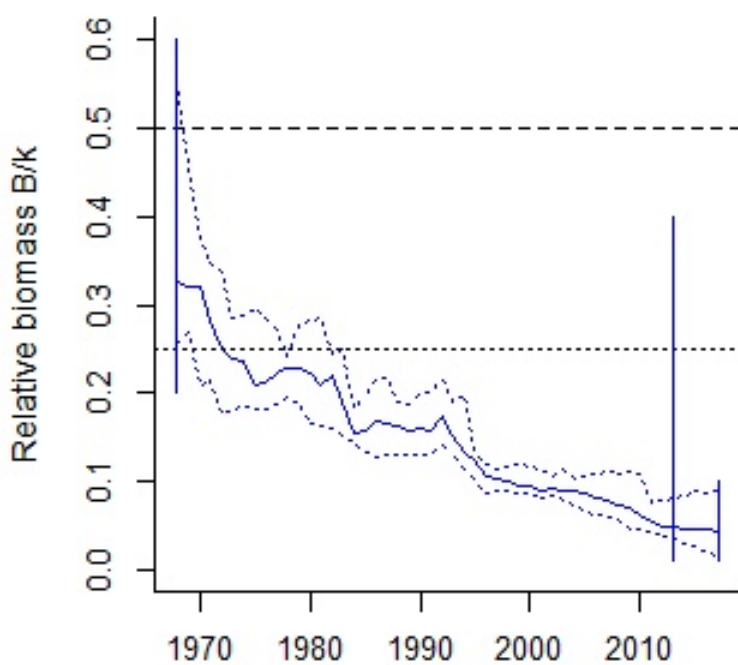

**E: Exploitation rate**

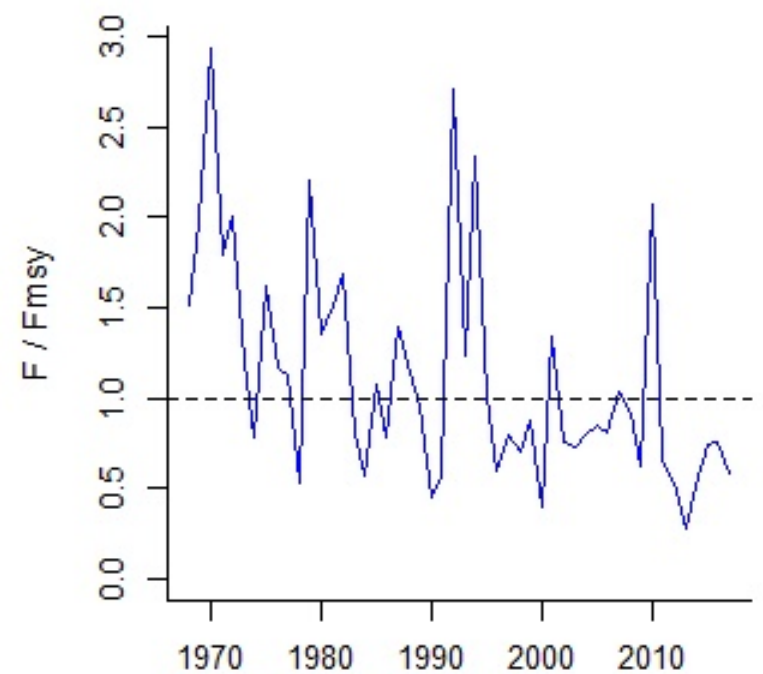

**F: Equilibrium curve**

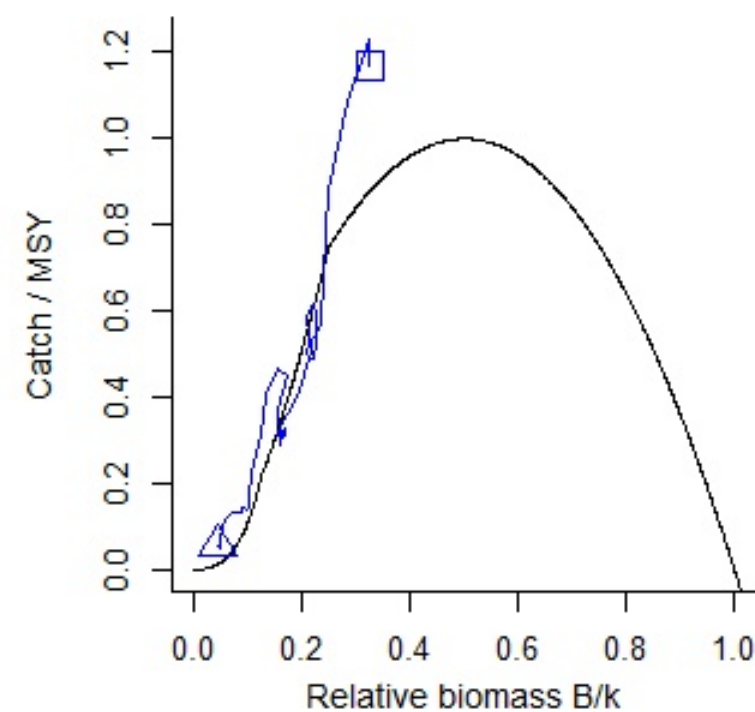

**Catch**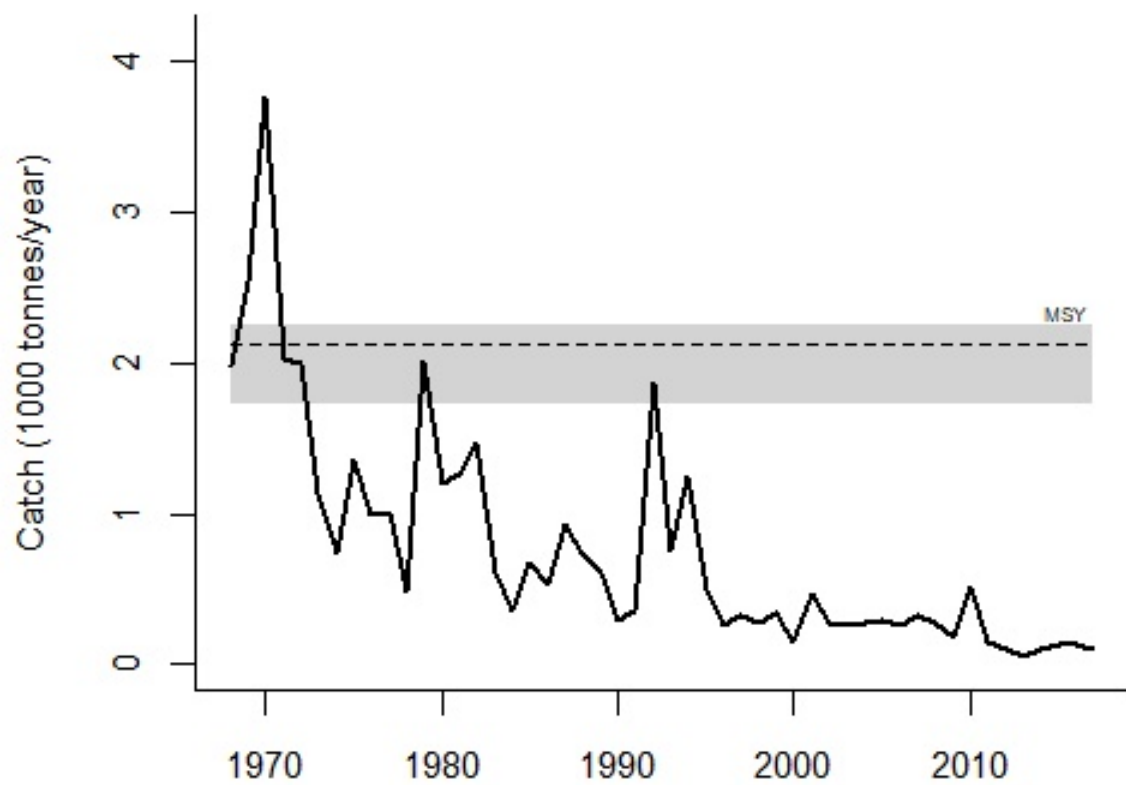**Stock size**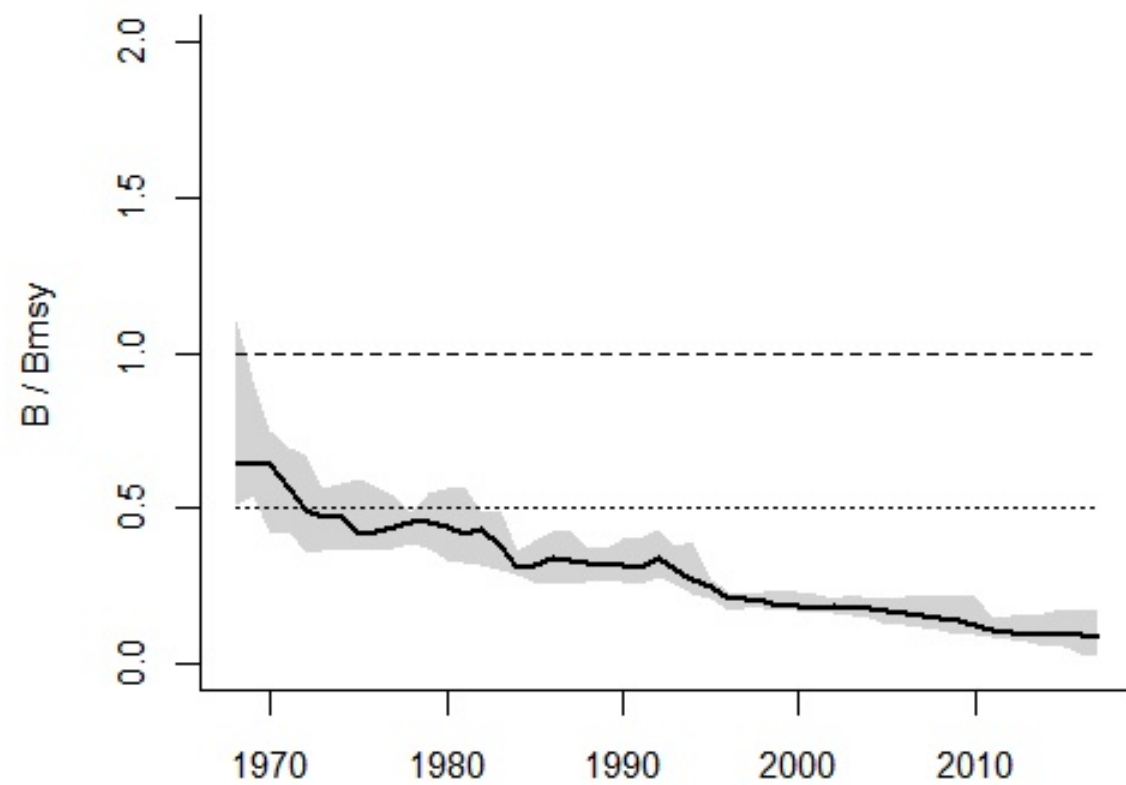**Exploitation**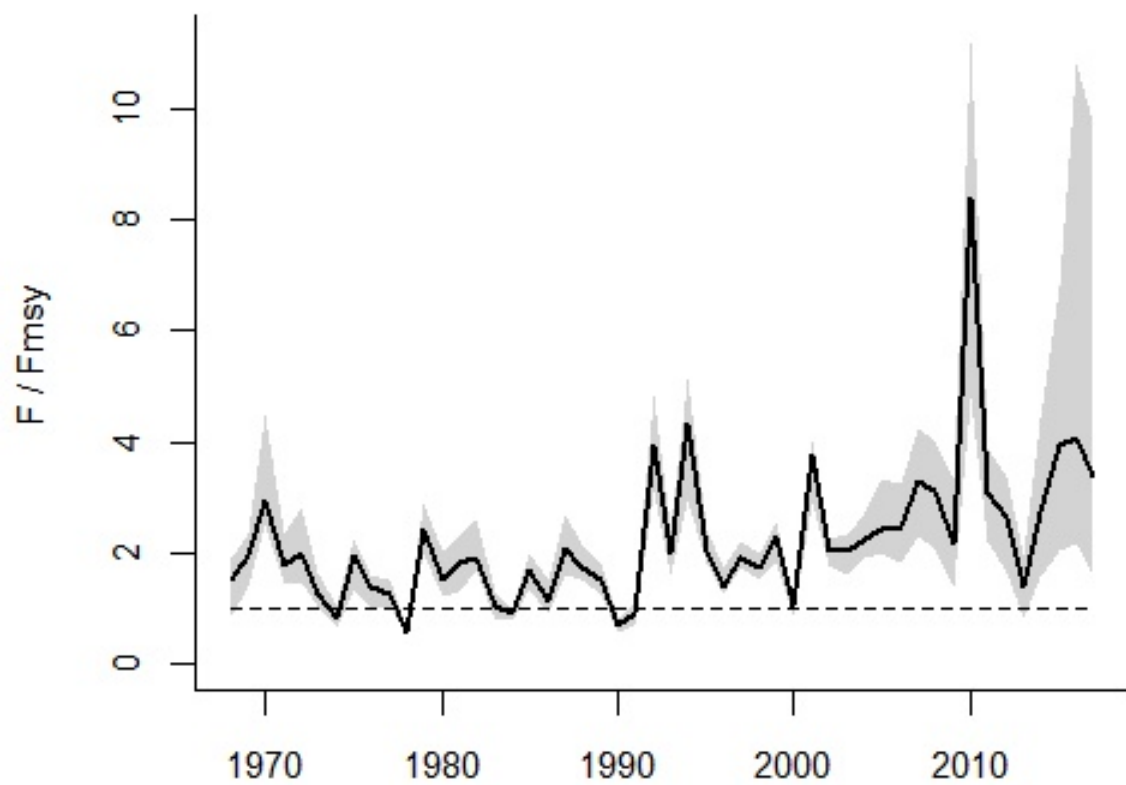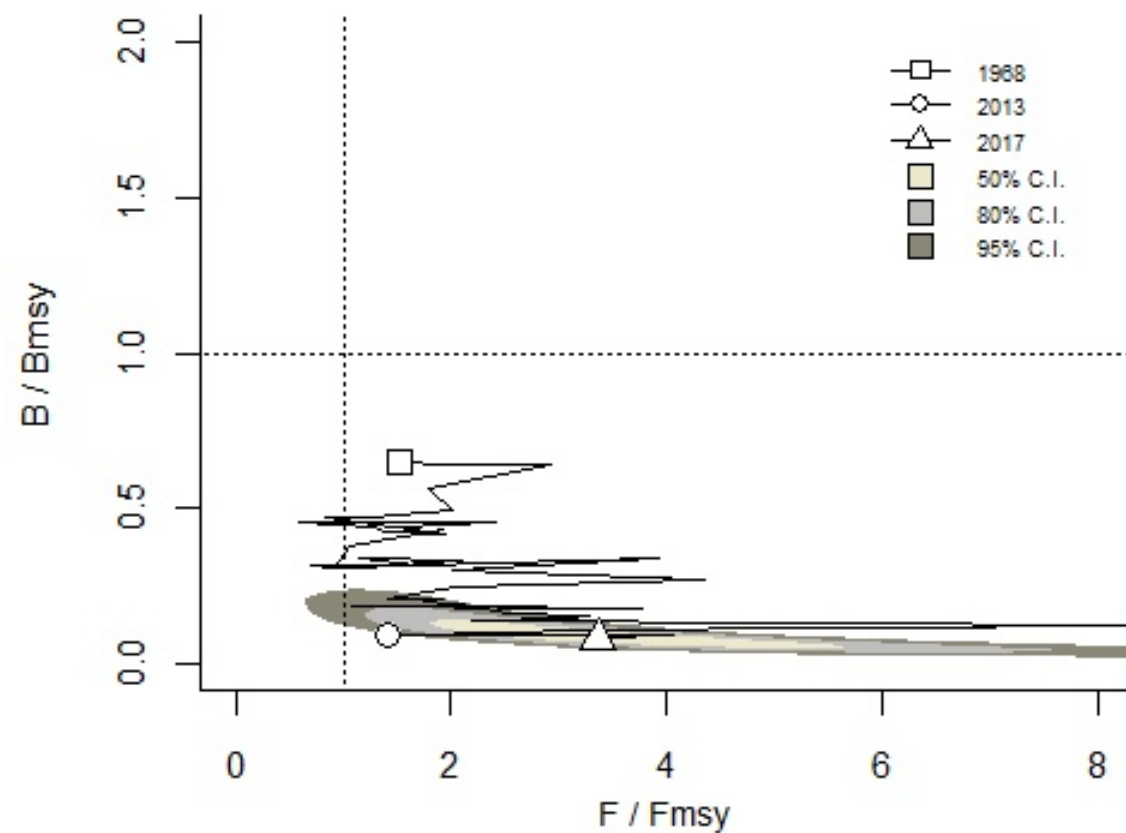



**A: Catch Turbot\_BS**

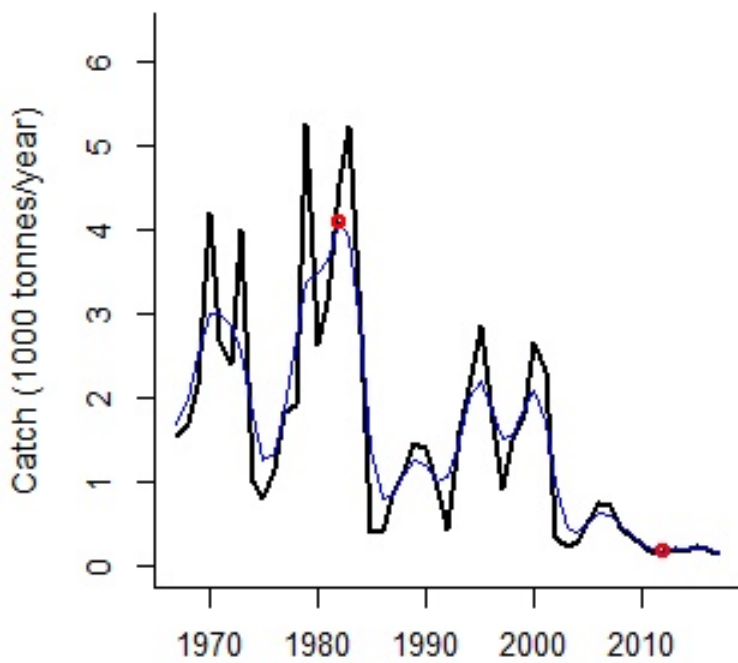

**B: Finding viable r-k**

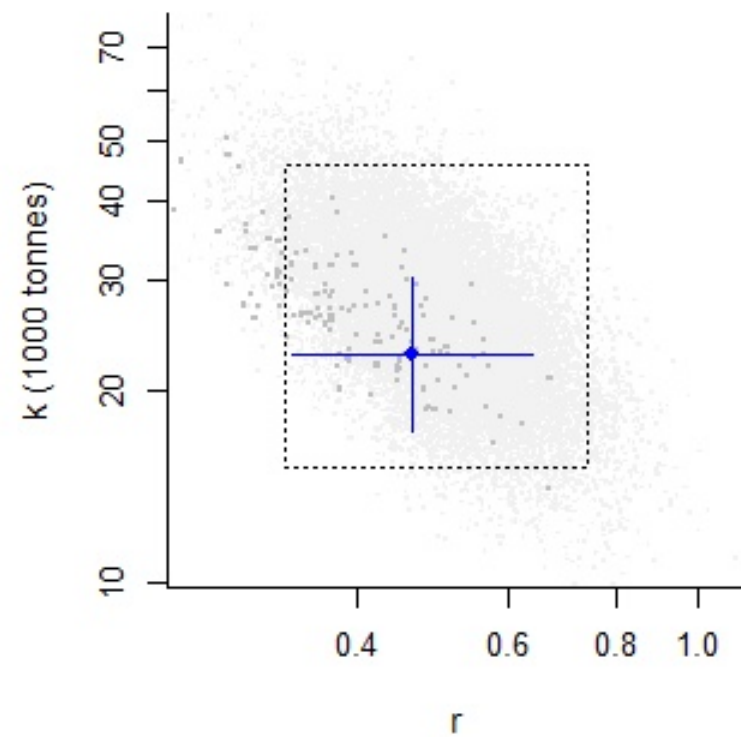

**C: Analysis of viable r-k**

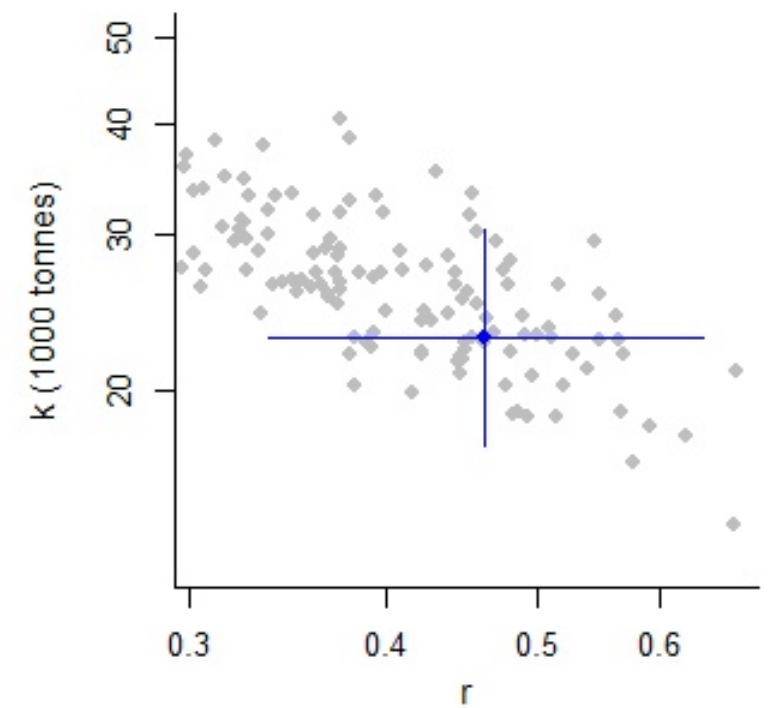

**D: Stock size**

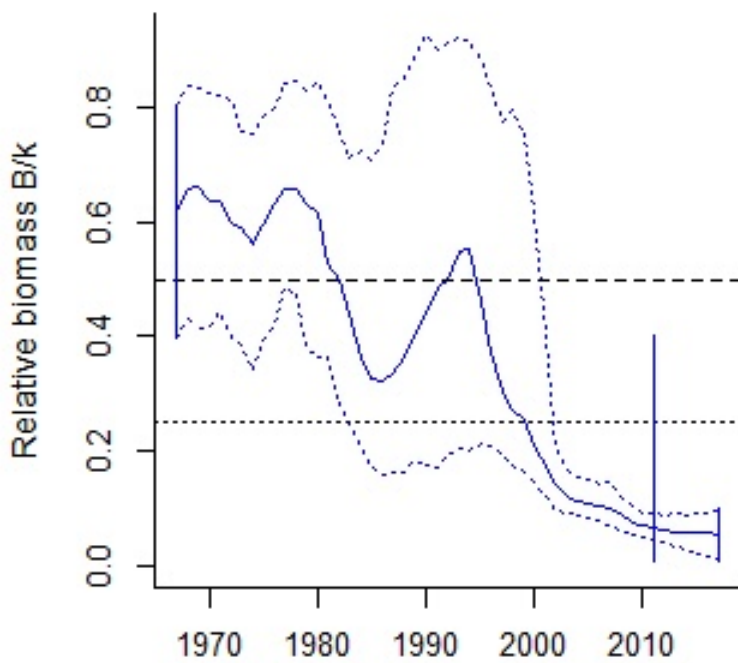

**E: Exploitation rate**

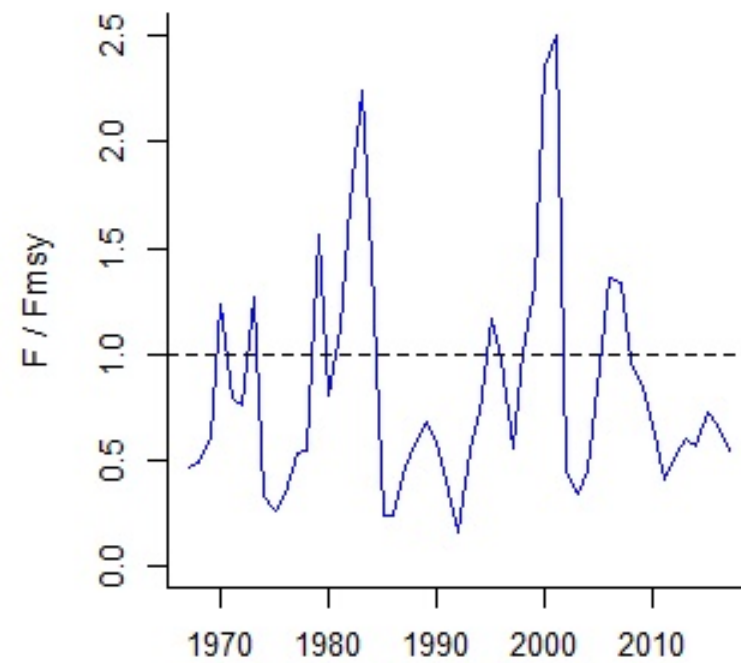

**F: Equilibrium curve**

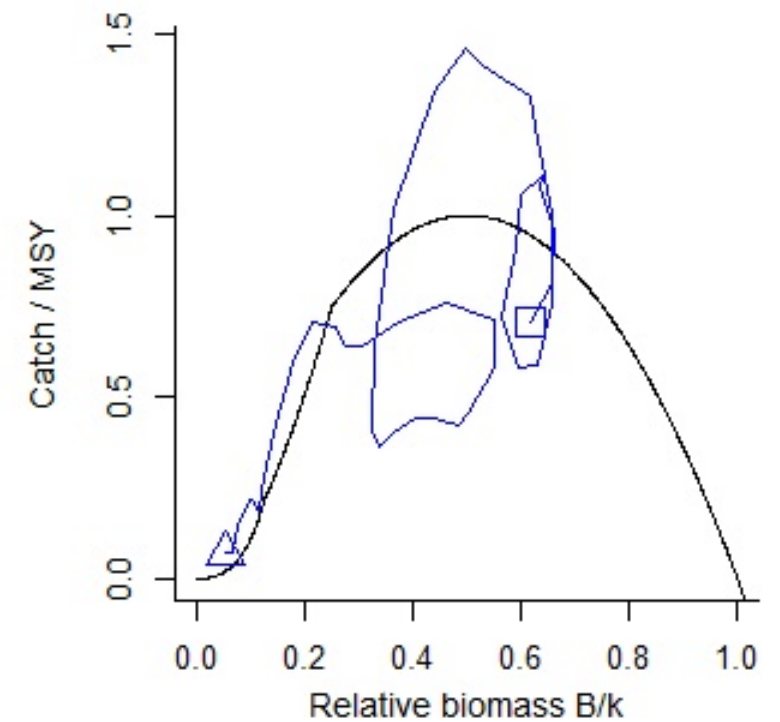



**Catch**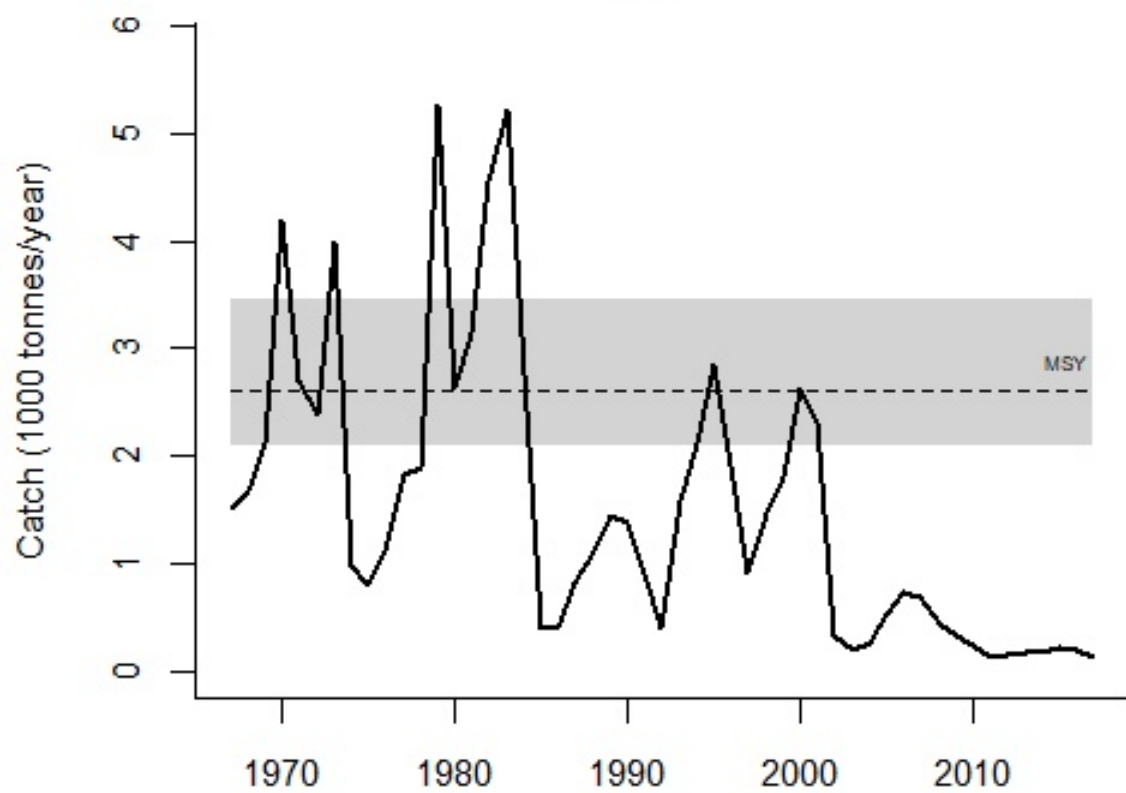**Stock size**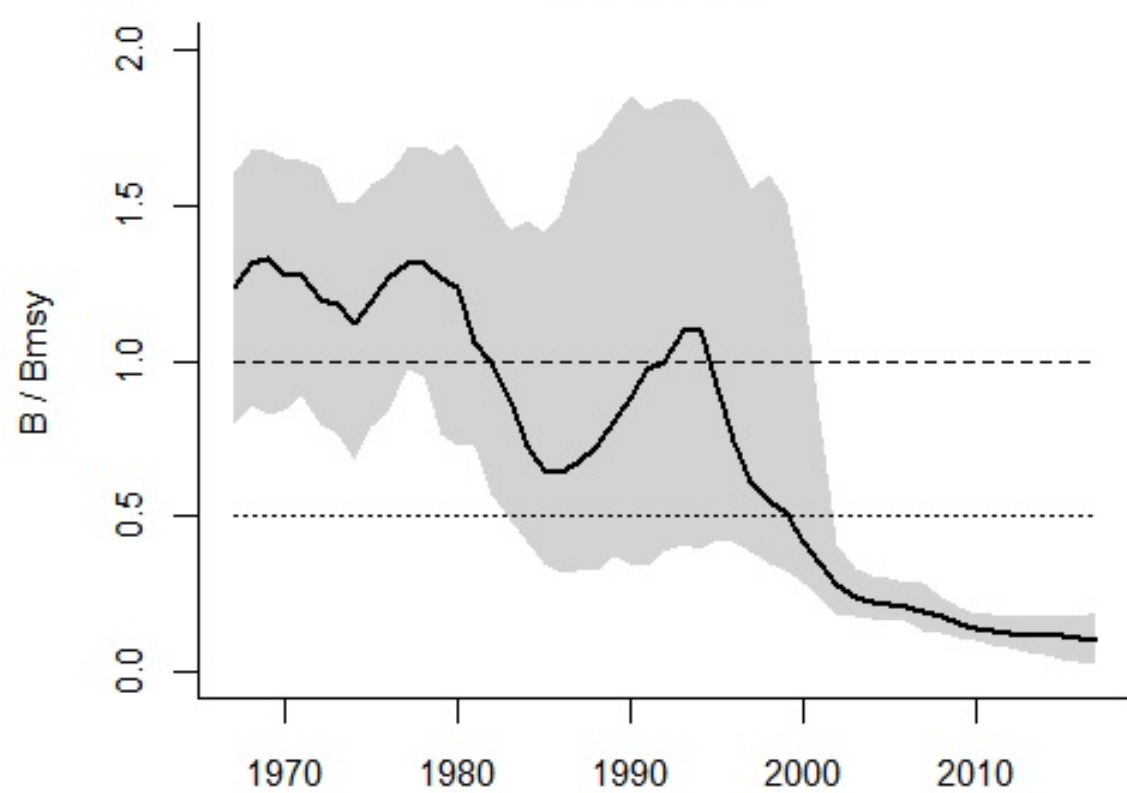**Exploitation**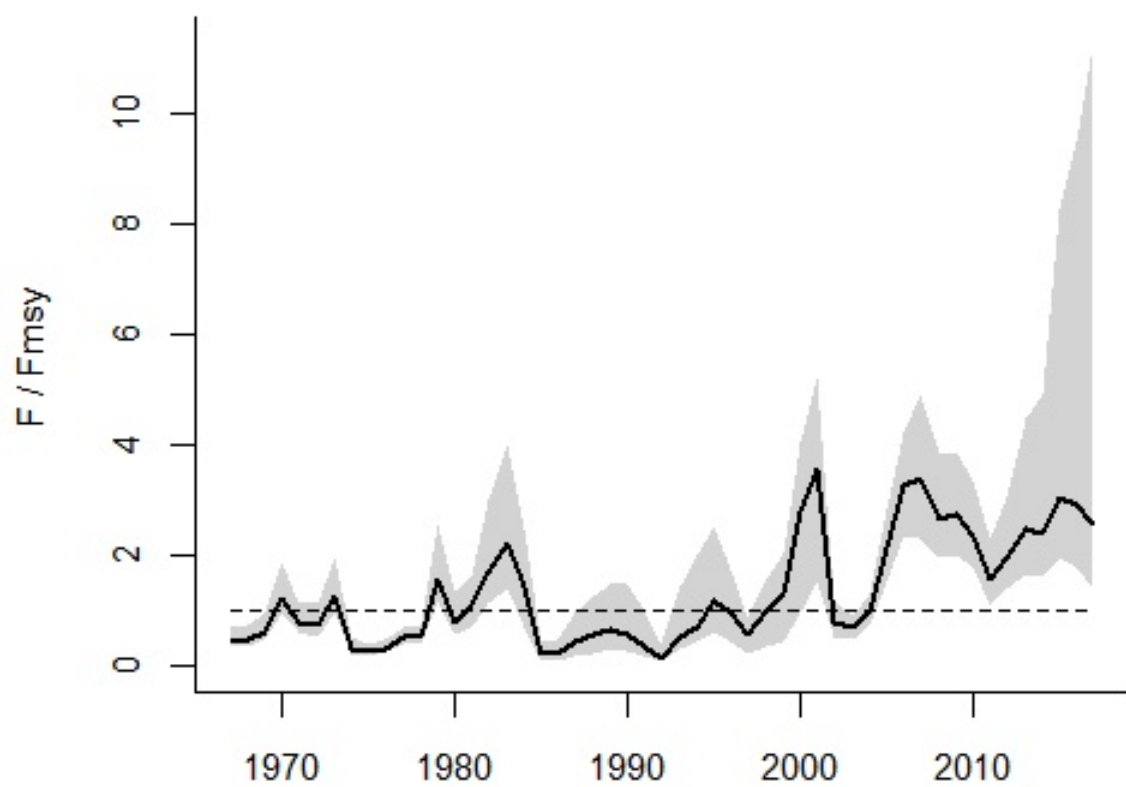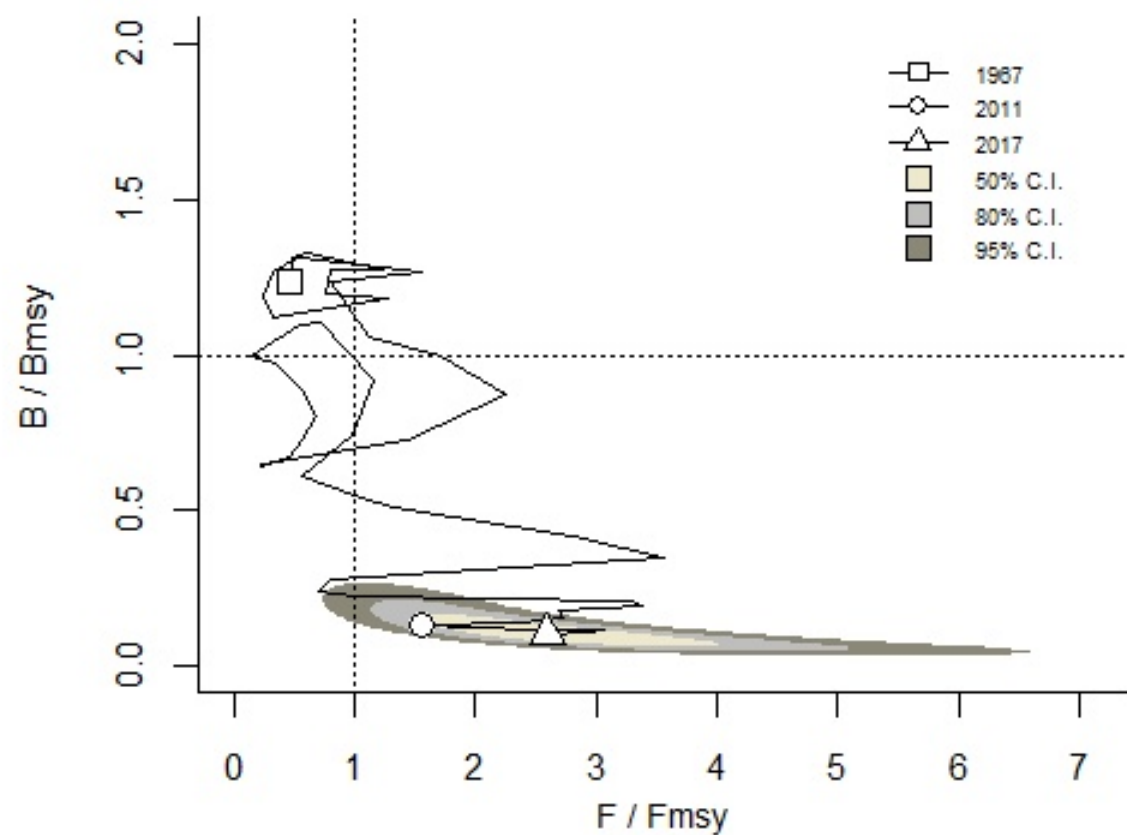

**A: Catch Mullet\_BS**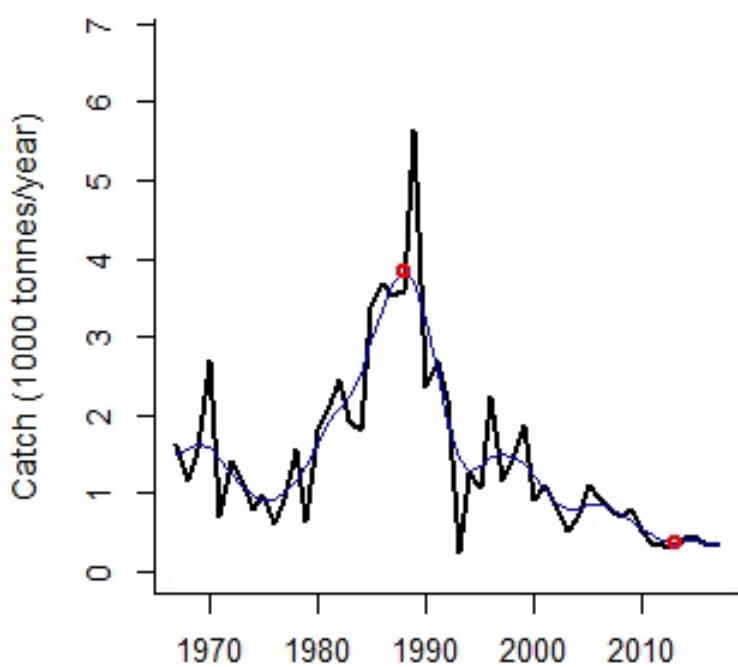**B: Finding viable r-k**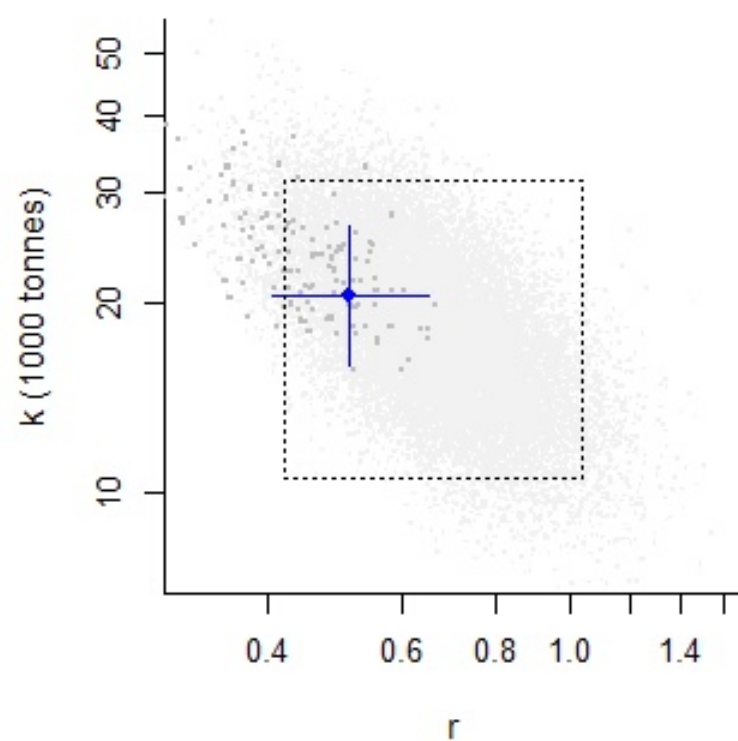**C: Analysis of viable r-k**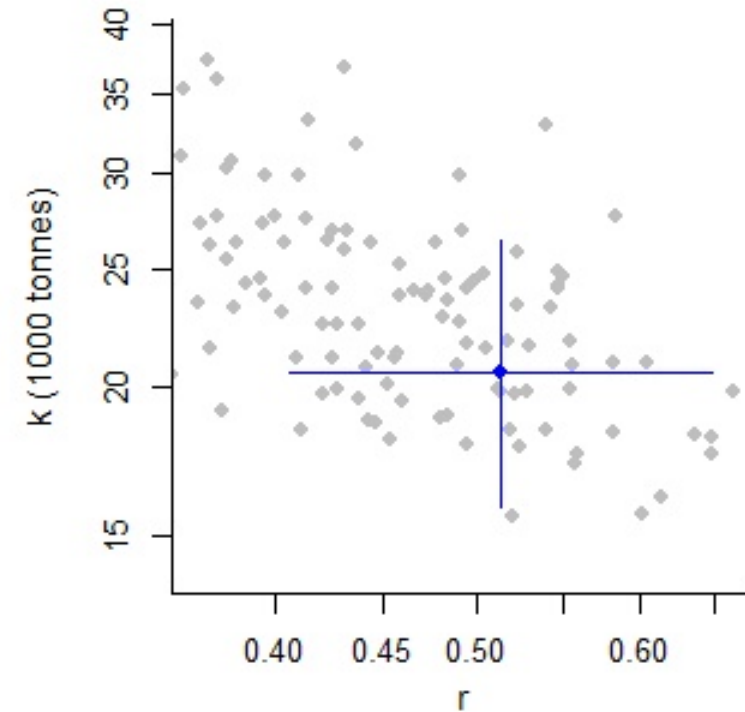**D: Stock size**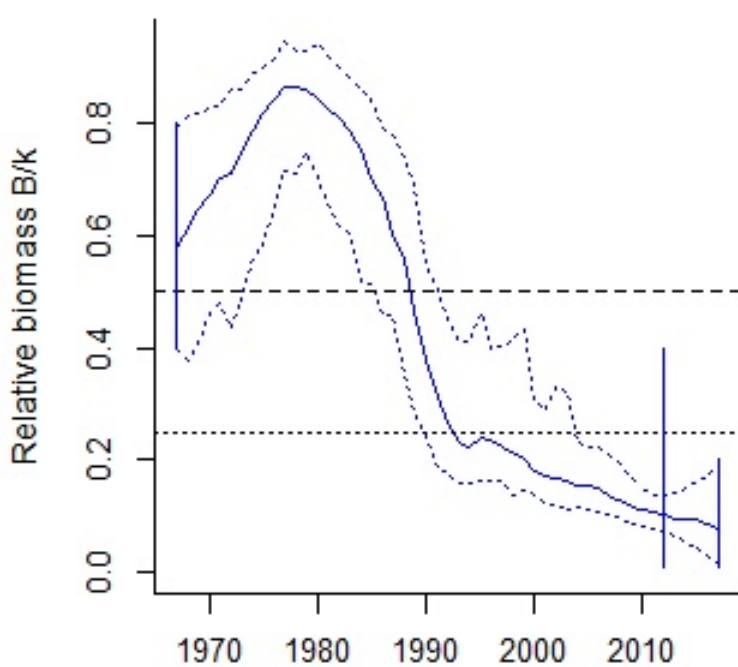**E: Exploitation rate**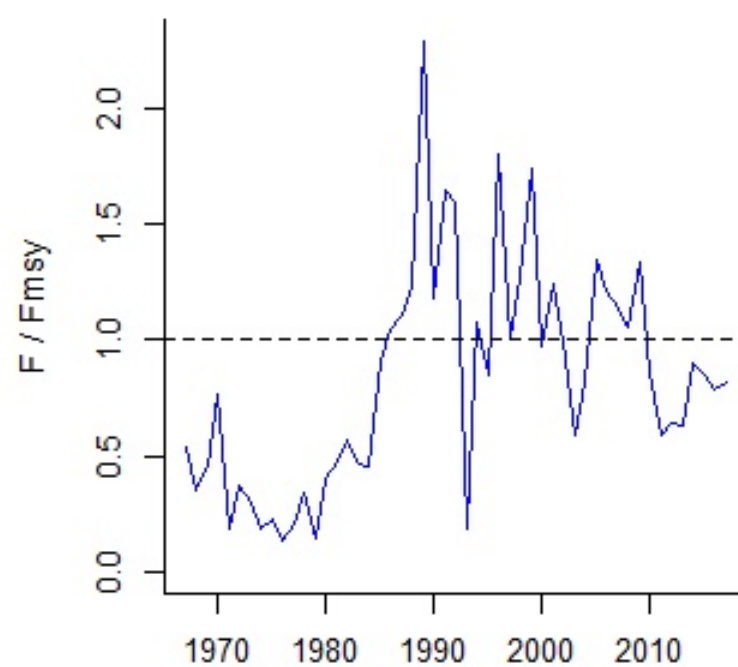**F: Equilibrium curve**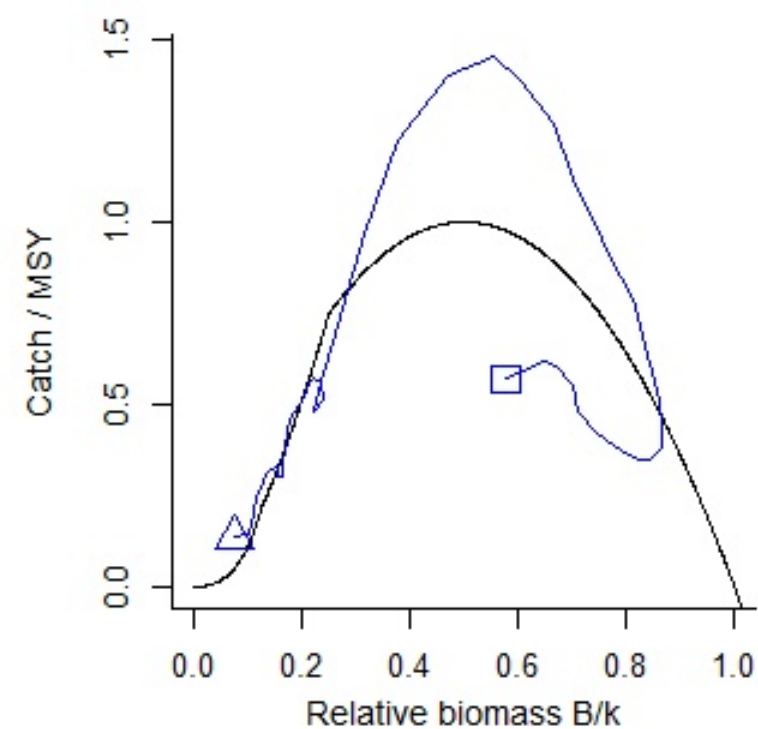

**Catch**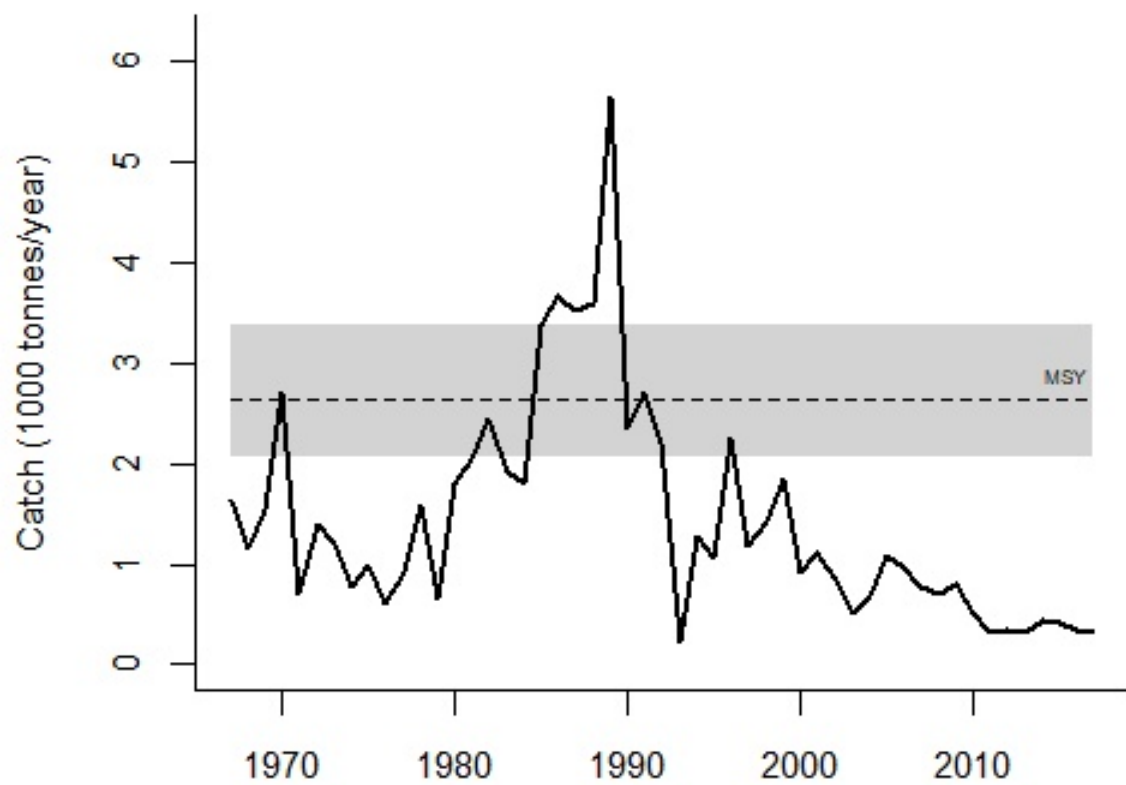**Stock size**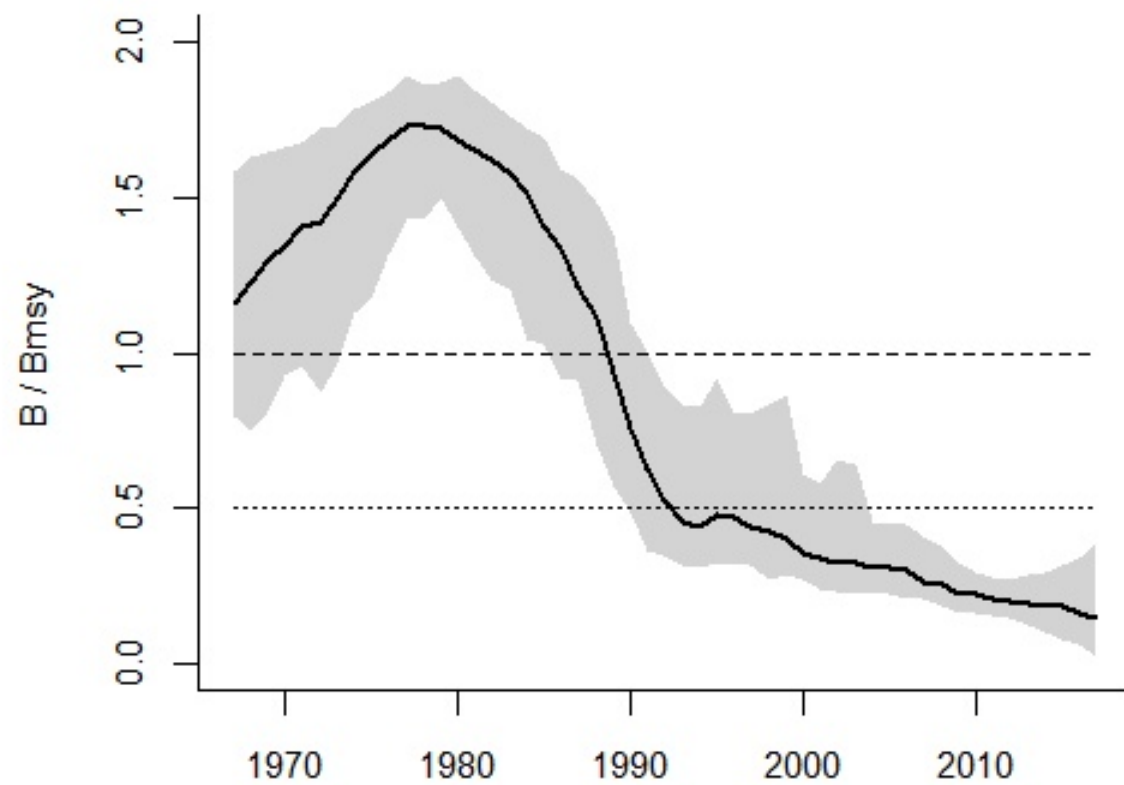**Exploitation**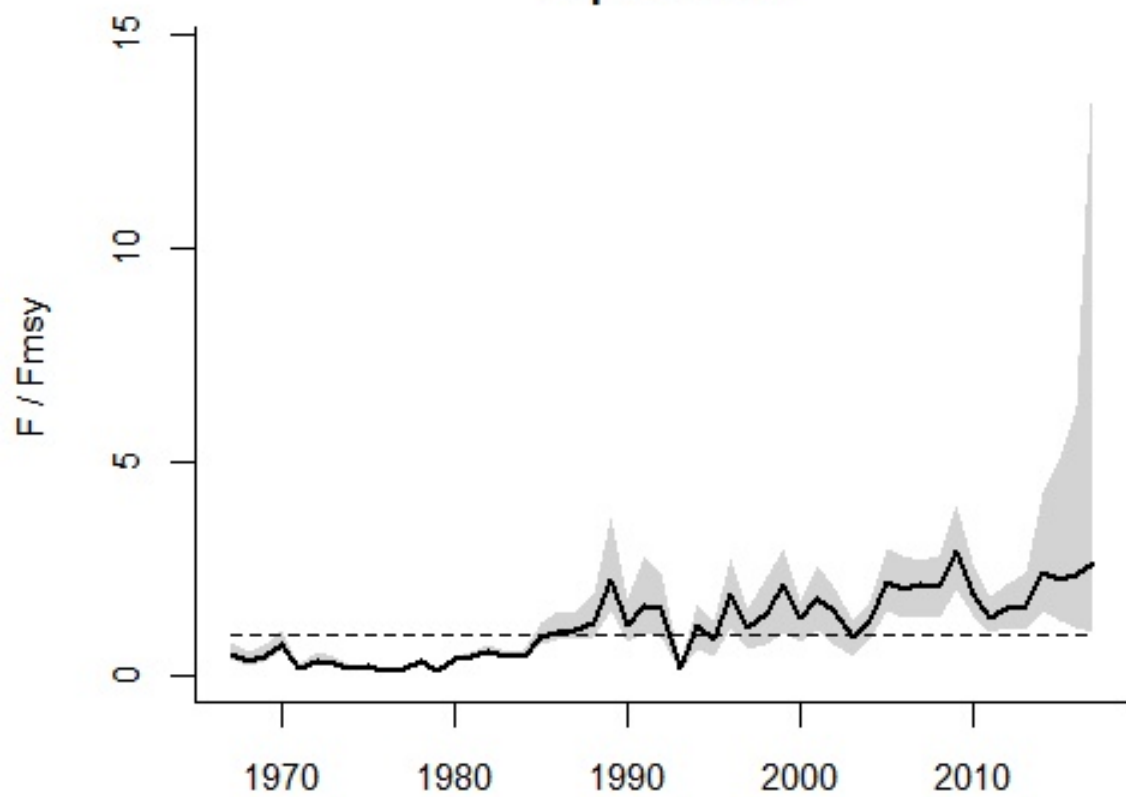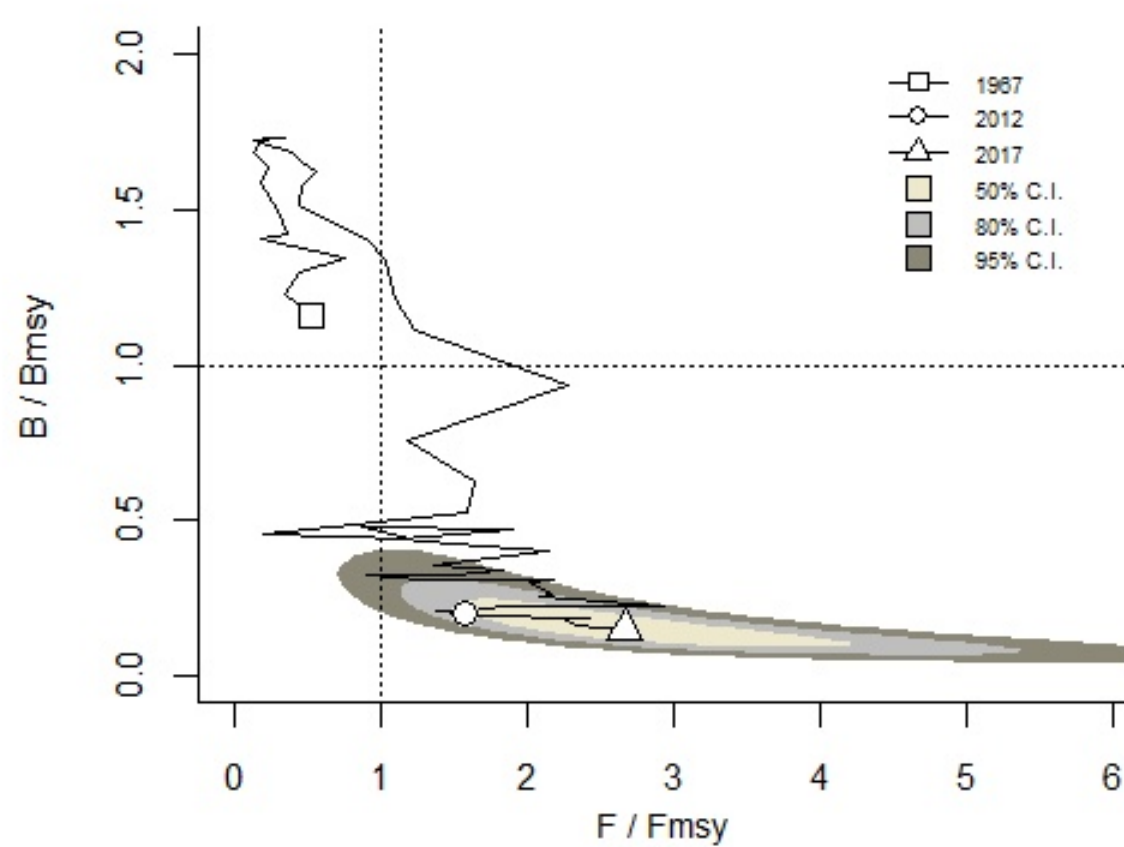

**A: Catch Raja\_BS**

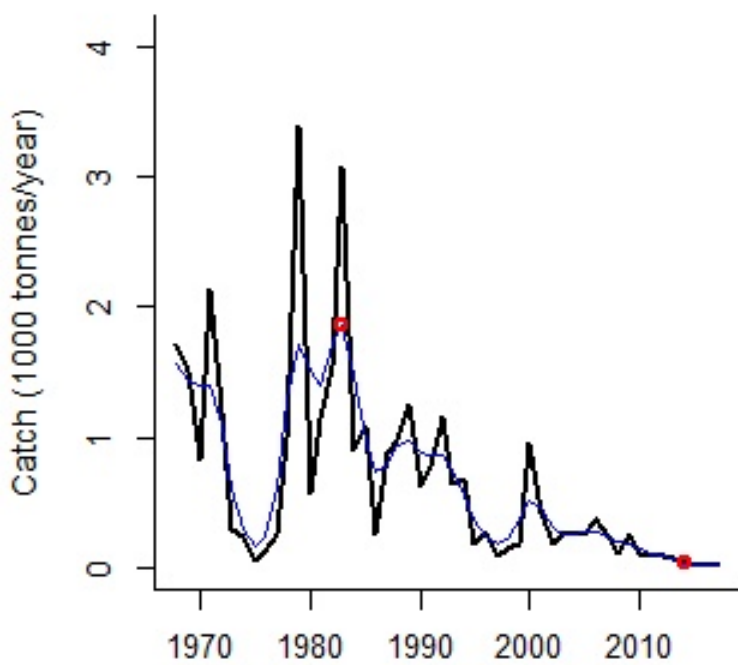

**B: Finding viable r-k**

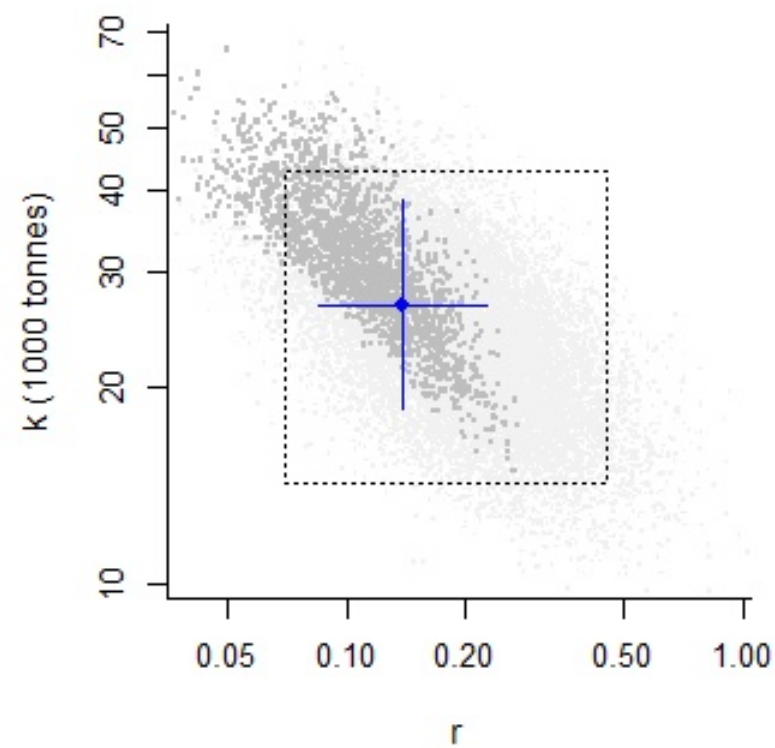

**C: Analysis of viable r-k**

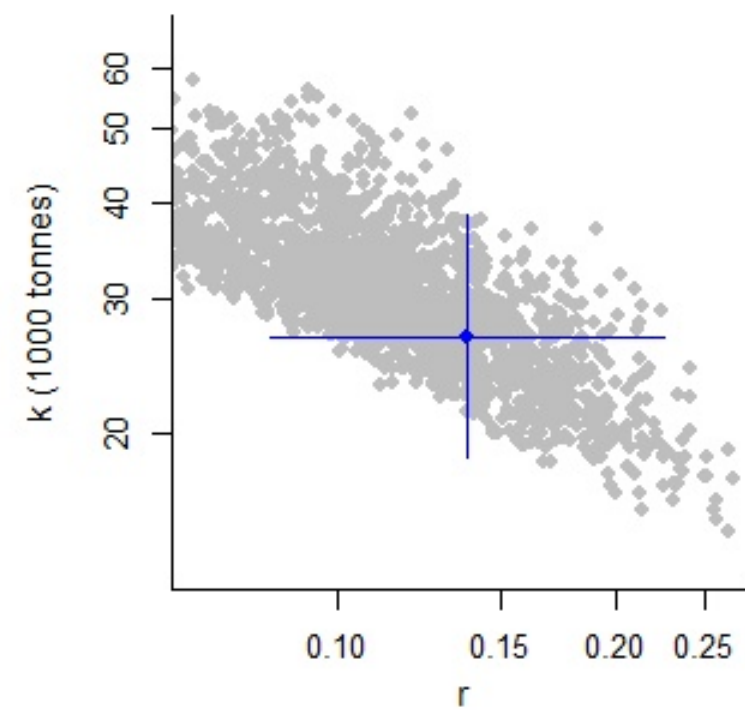

**D: Stock size**

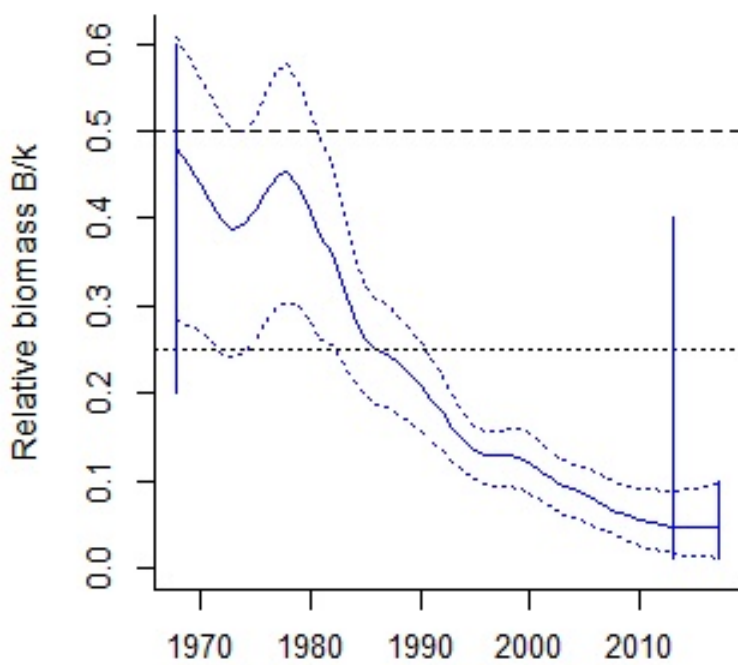

**E: Exploitation rate**

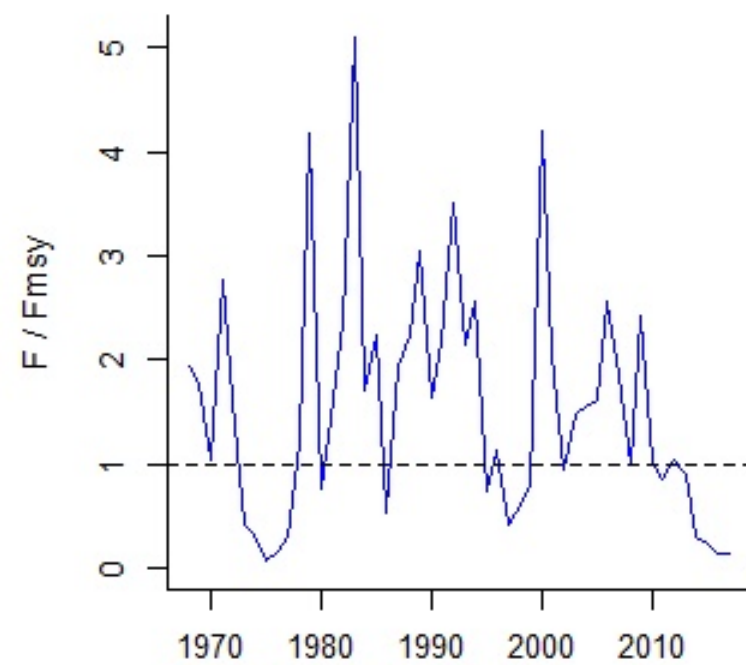

**F: Equilibrium curve**

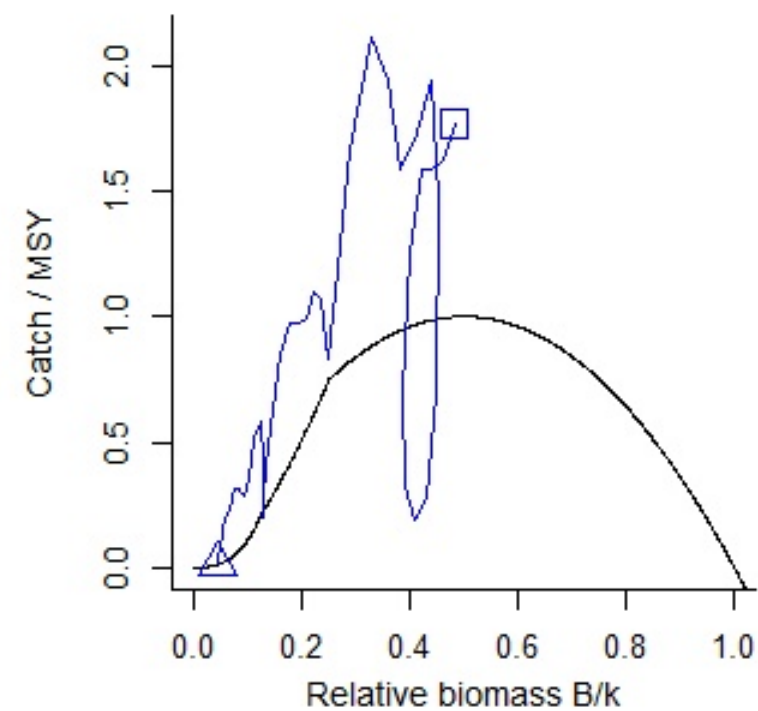



**Catch**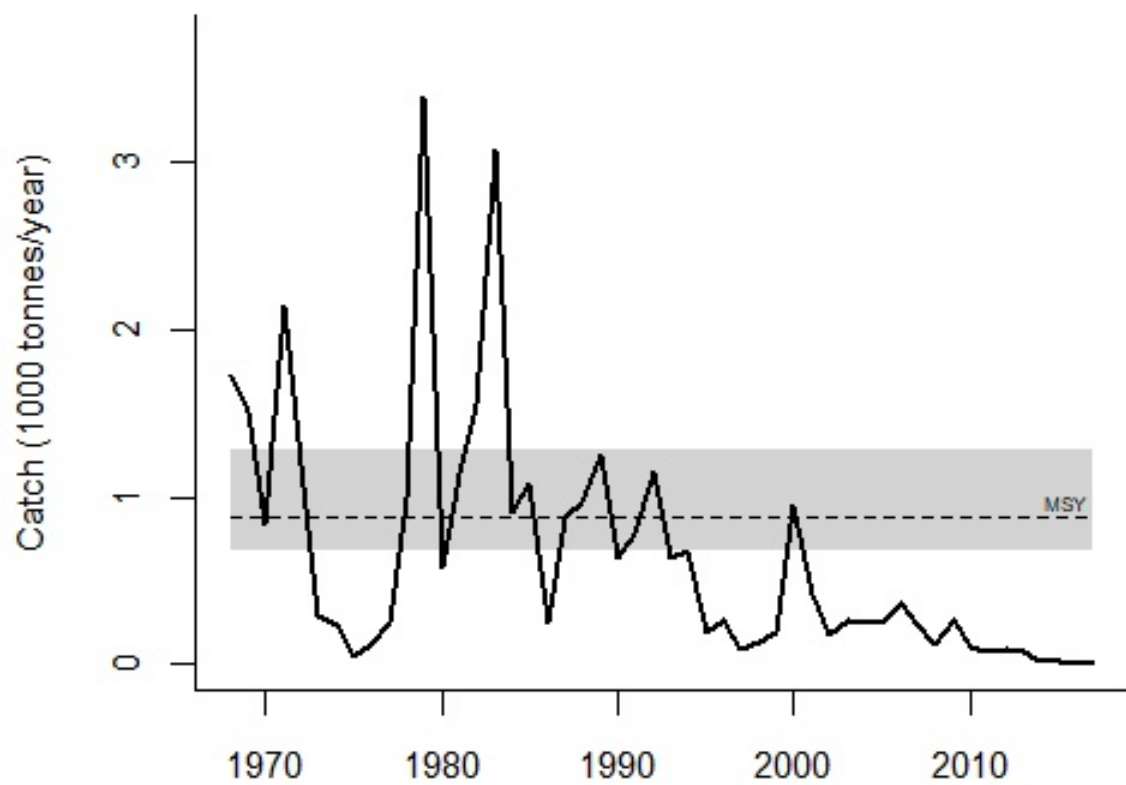**Stock size**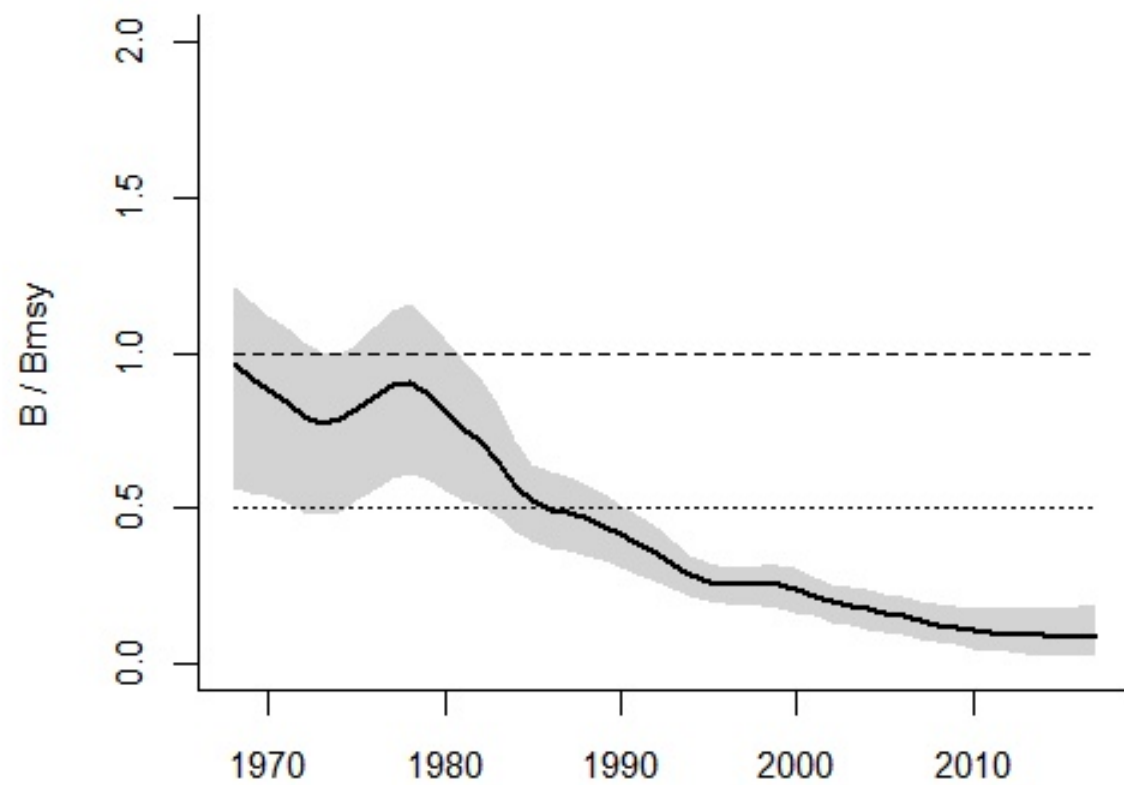**Exploitation**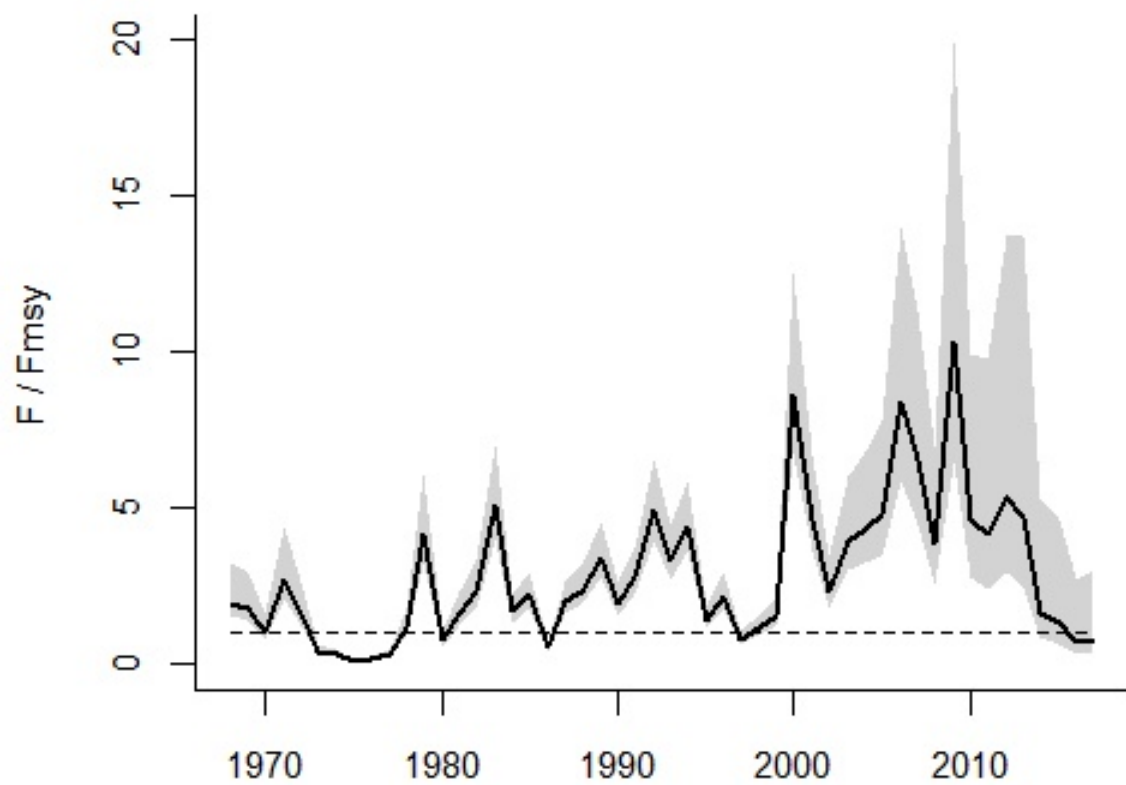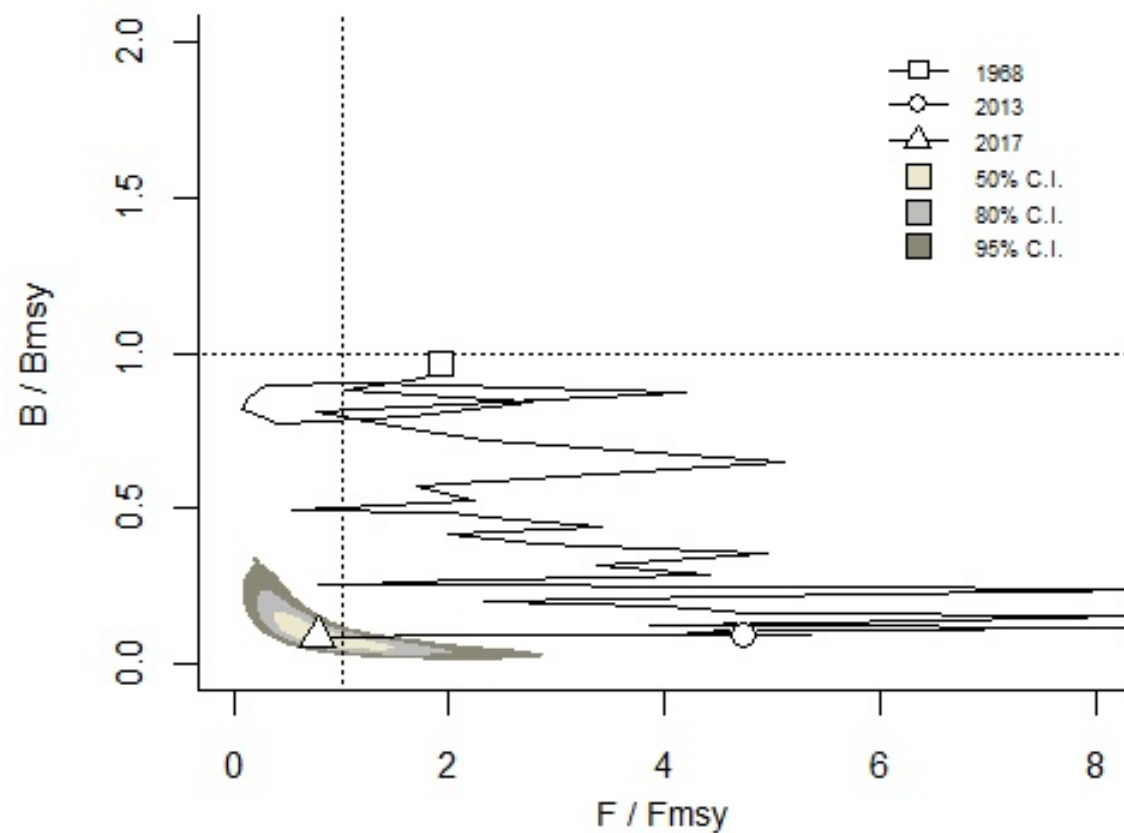

**A: Catch Dogfish\_BS**

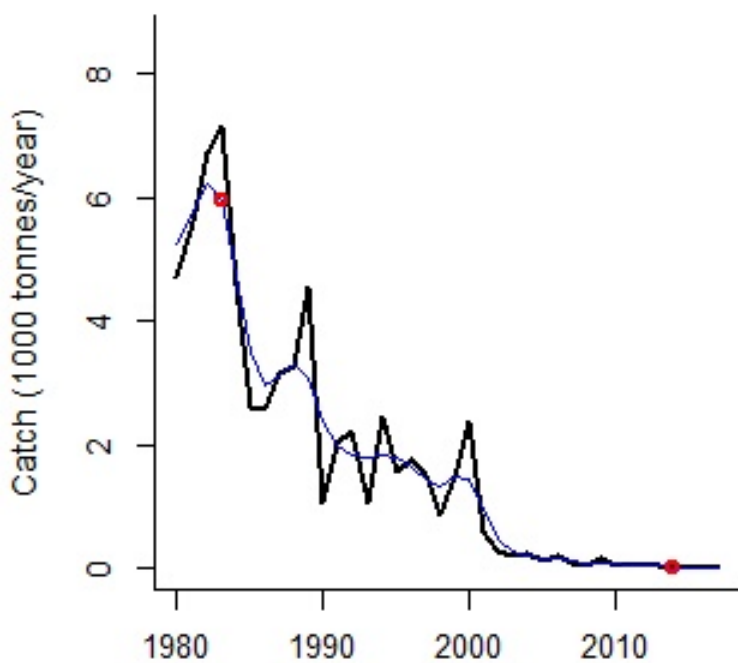

**B: Finding viable r-k**

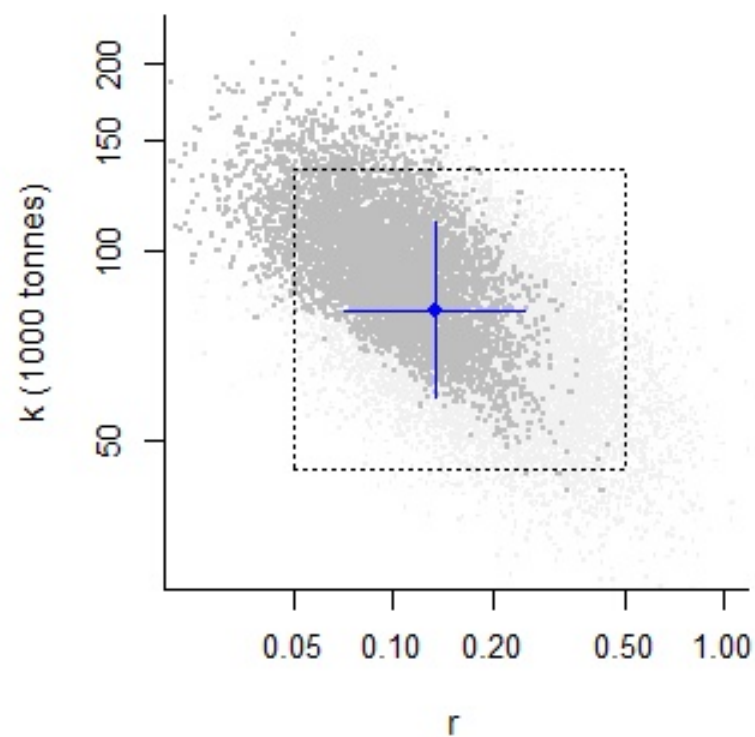

**C: Analysis of viable r-k**

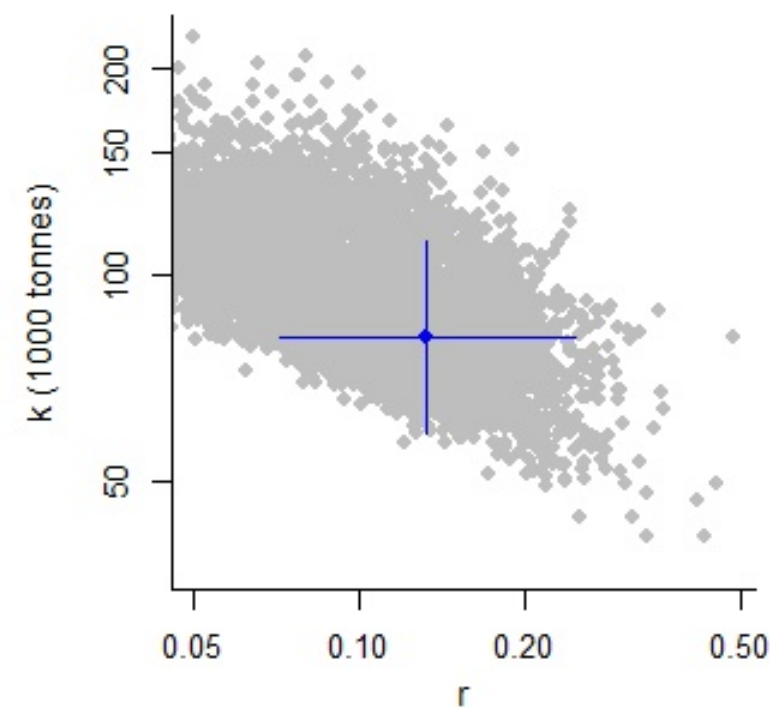

**D: Stock size**

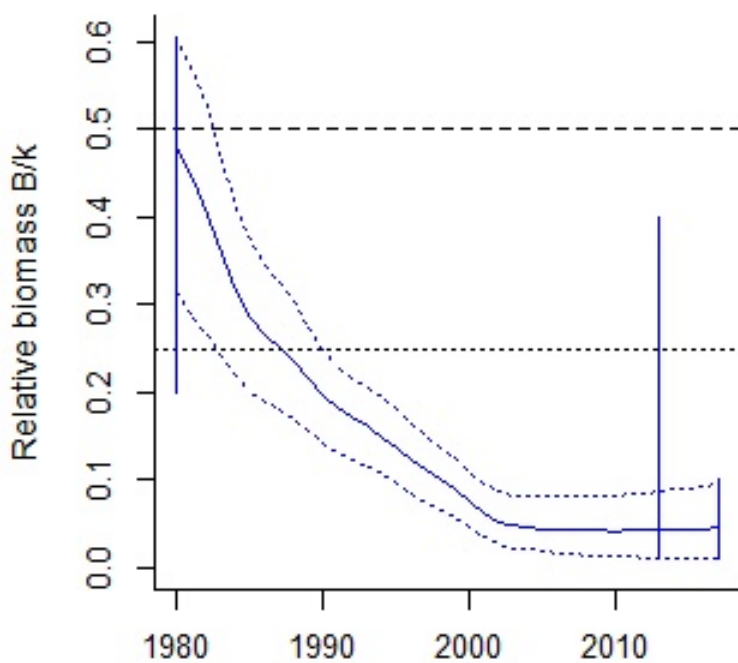

**E: Exploitation rate**

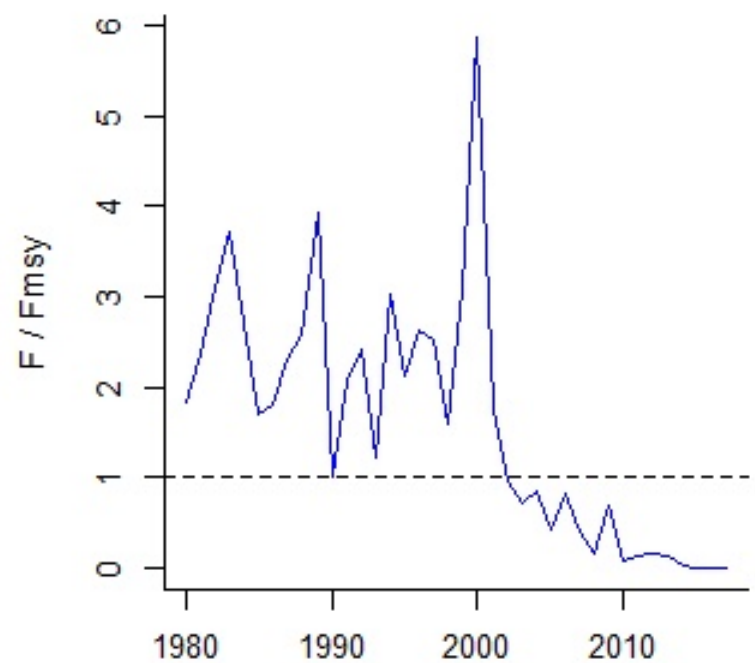

**F: Equilibrium curve**

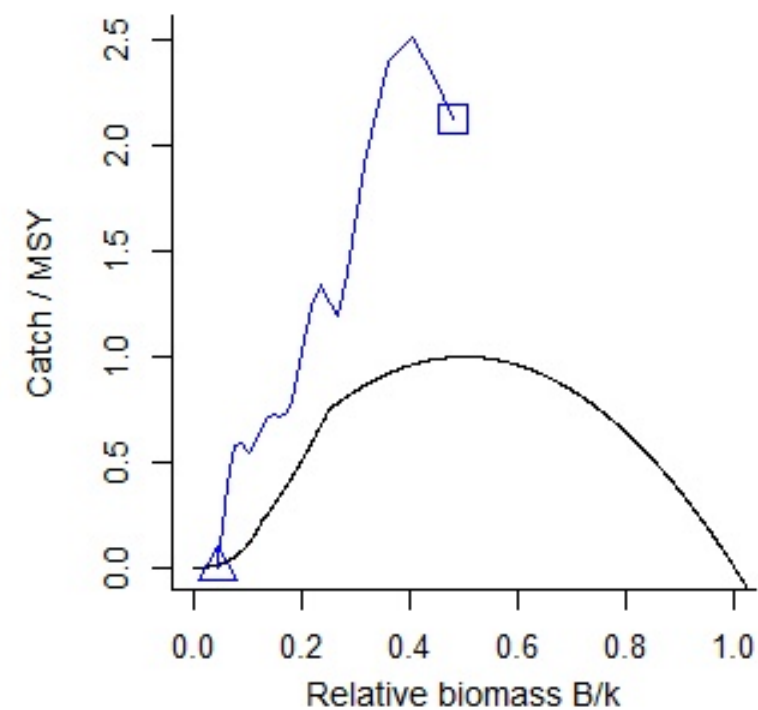

**Catch**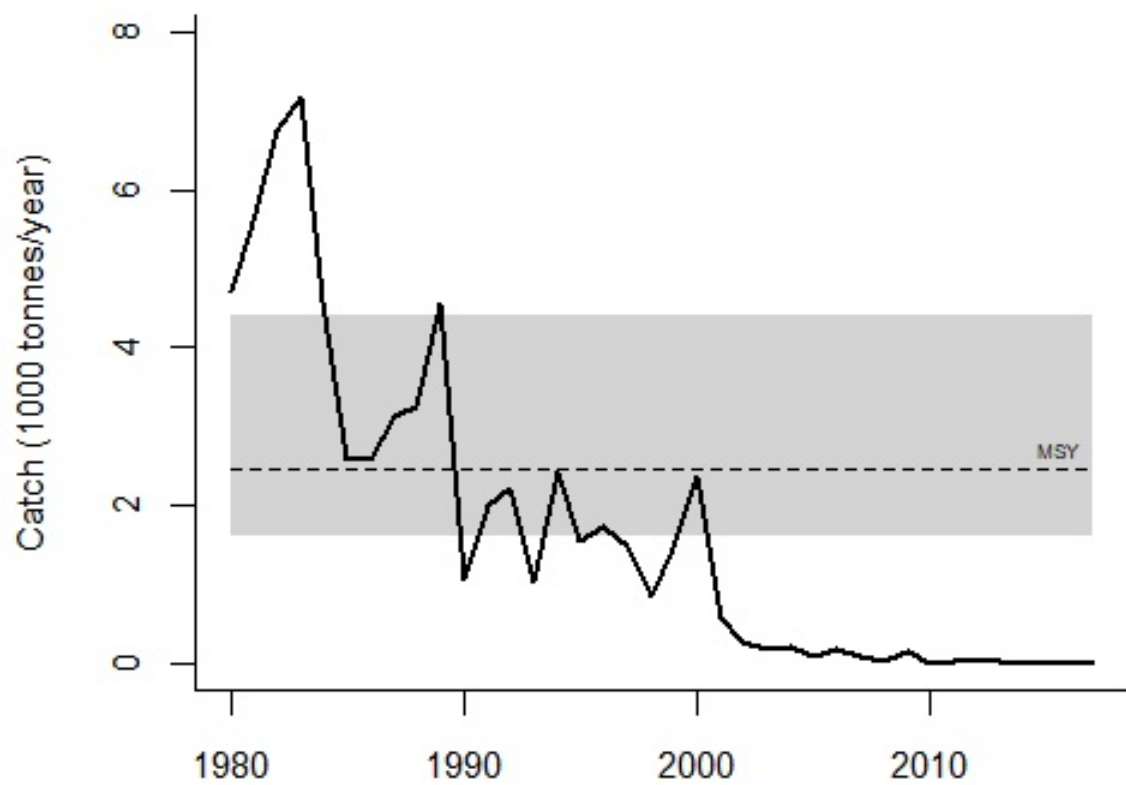**Stock size**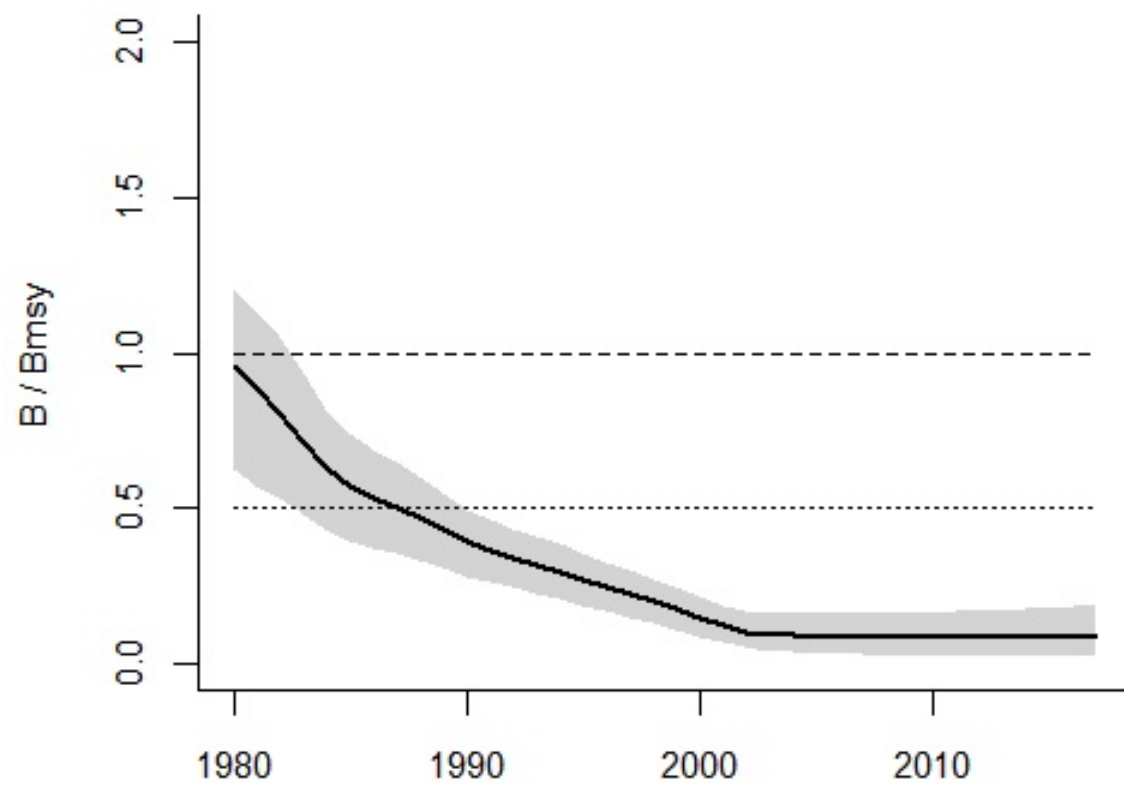**Exploitation**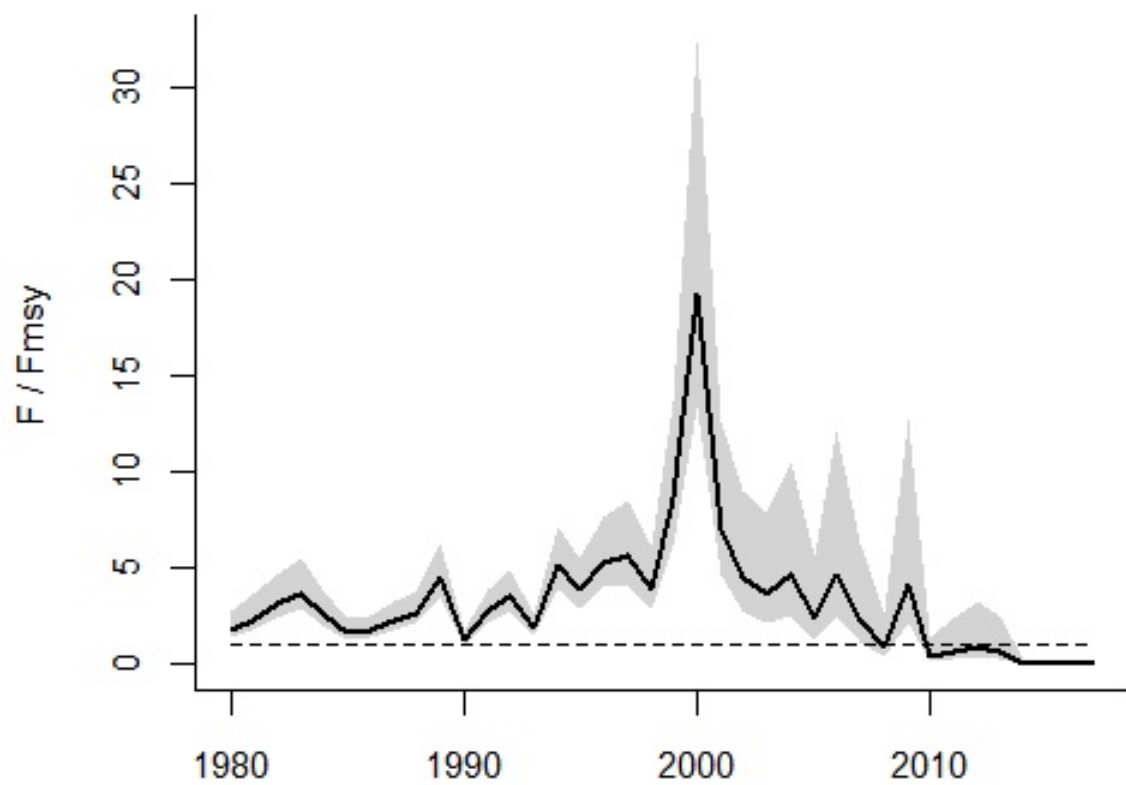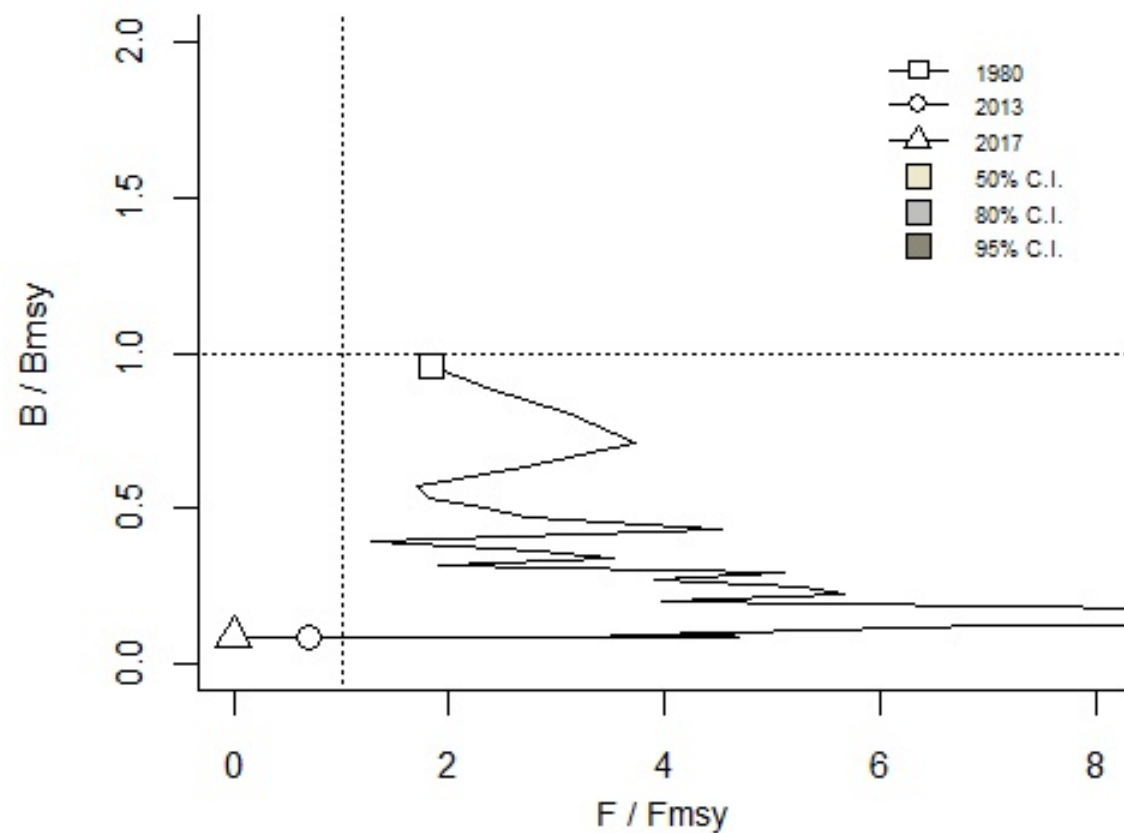

**A: Catch Venus\_BS**

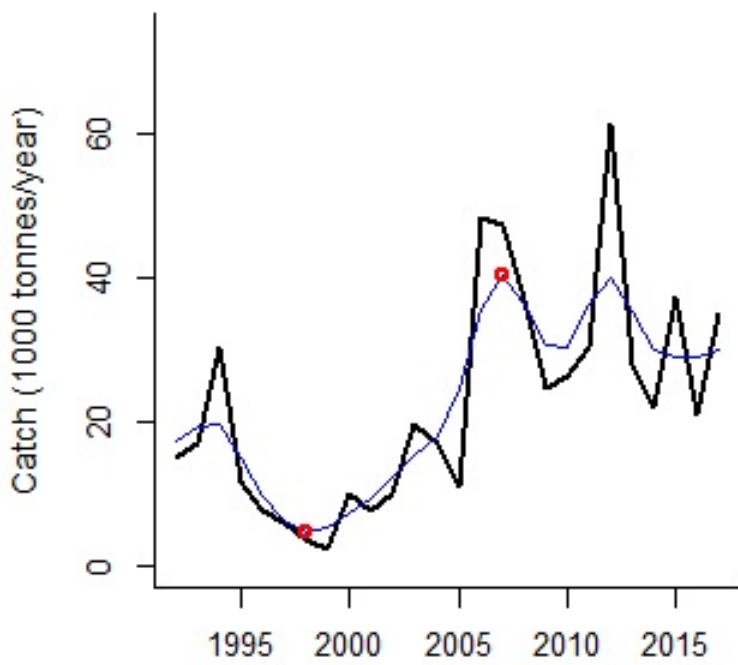

**B: Finding viable r-k**

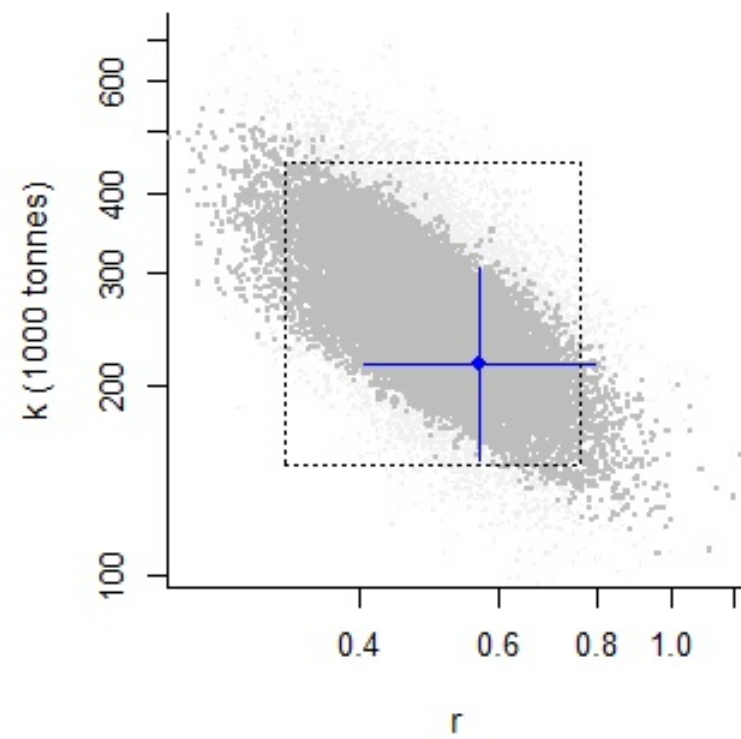

**C: Analysis of viable r-k**

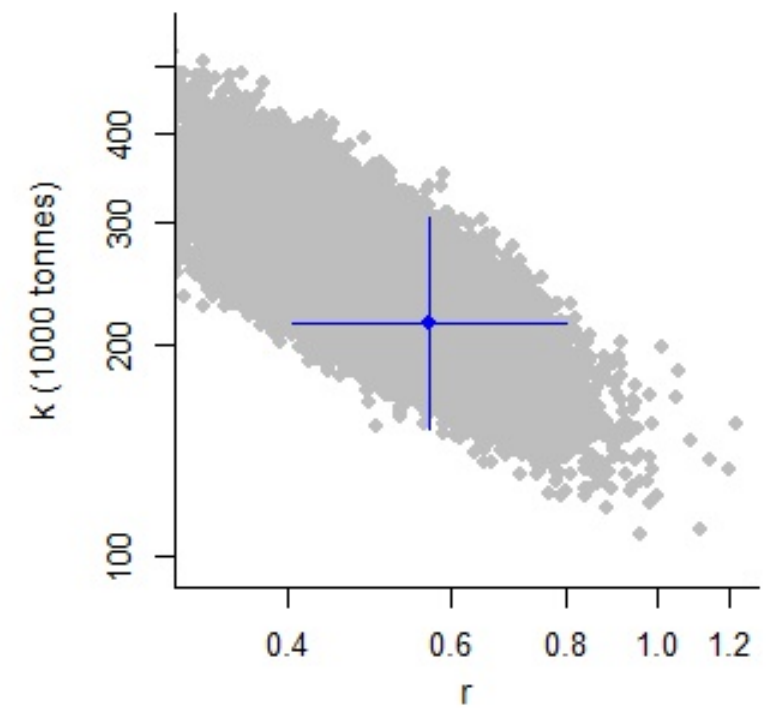

**D: Stock size**

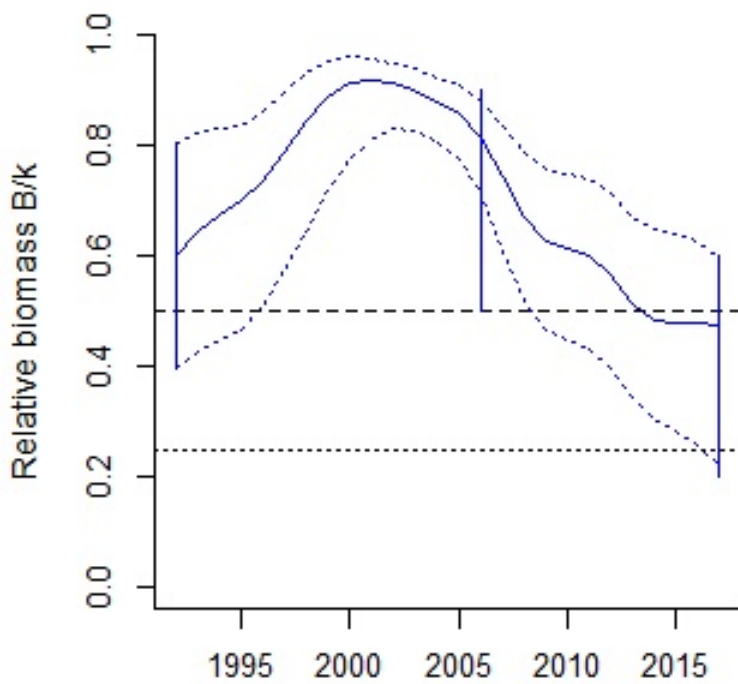

**E: Exploitation rate**

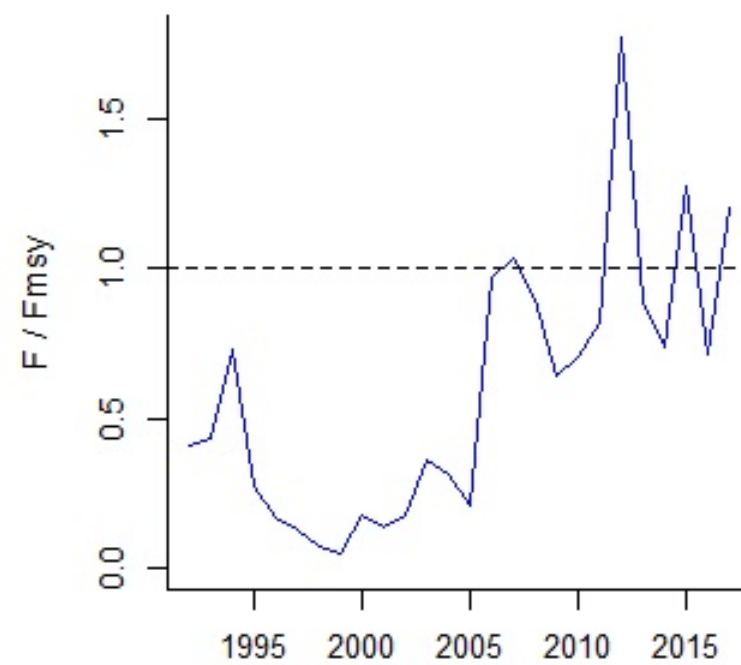

**F: Equilibrium curve**

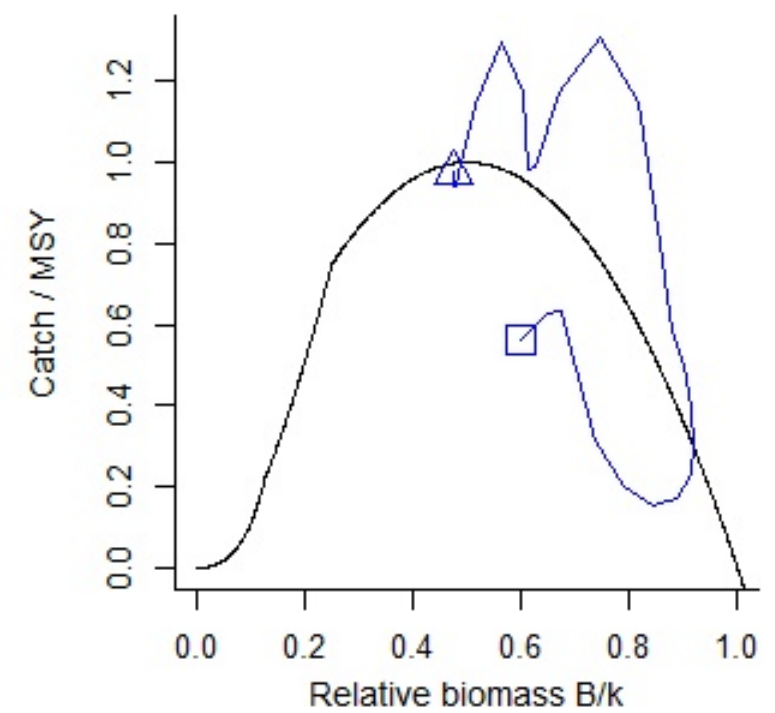



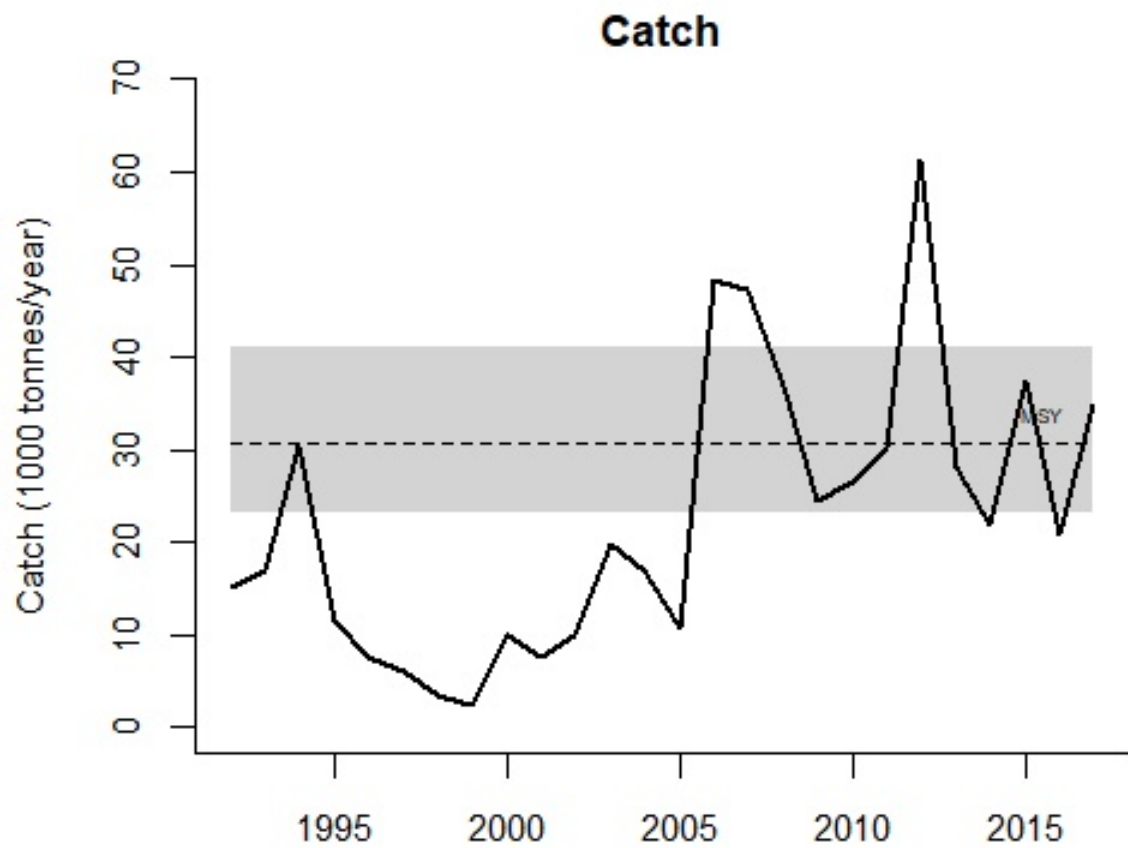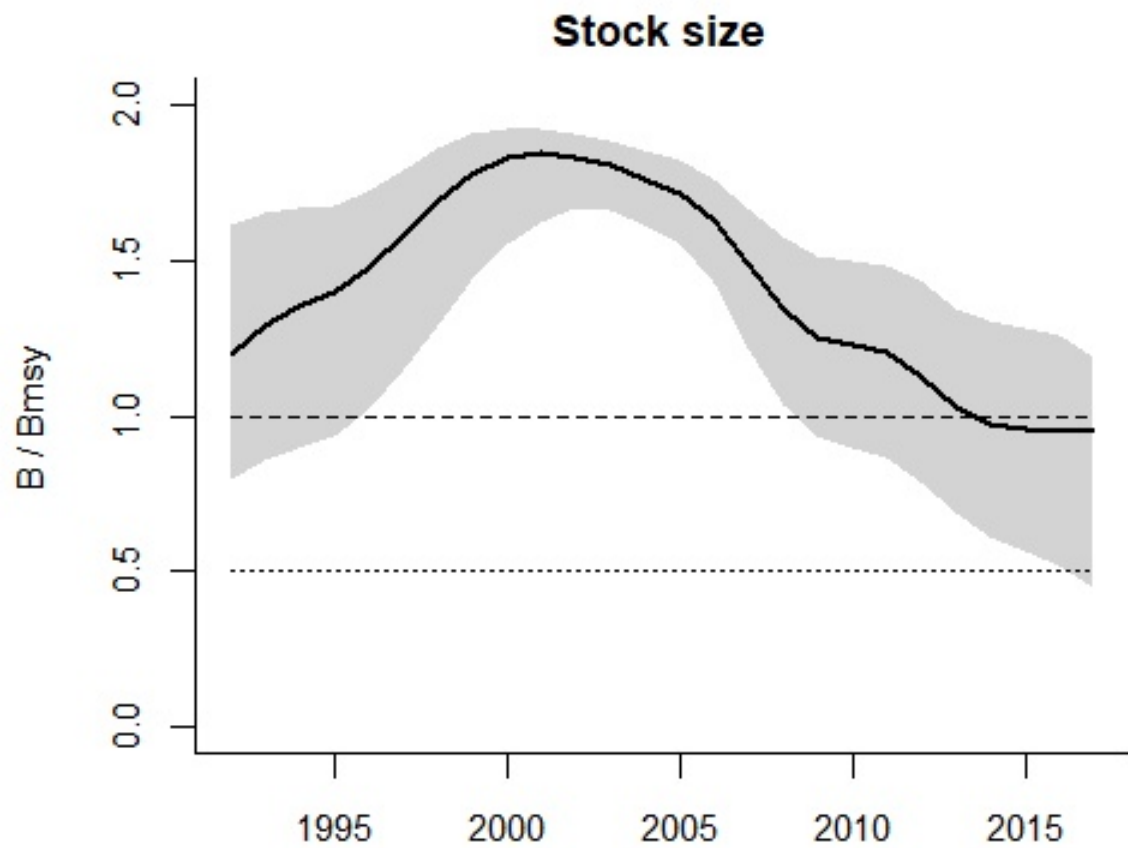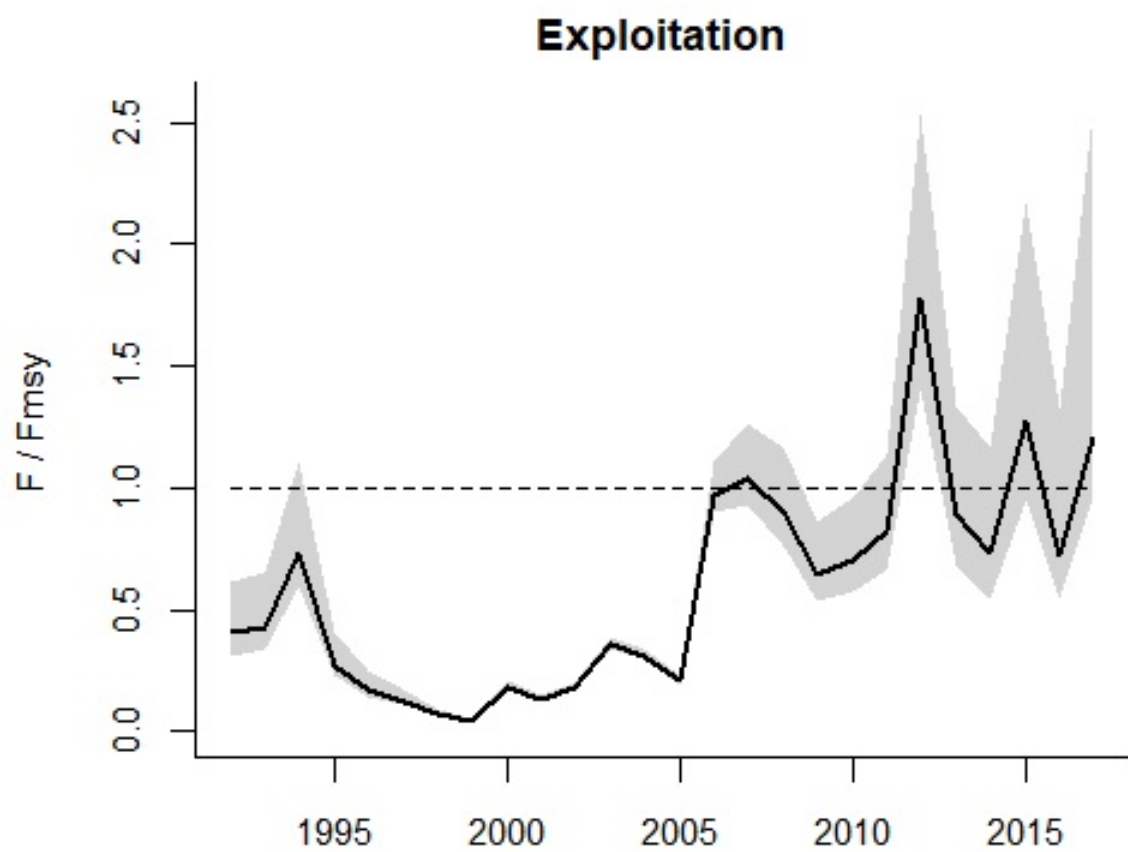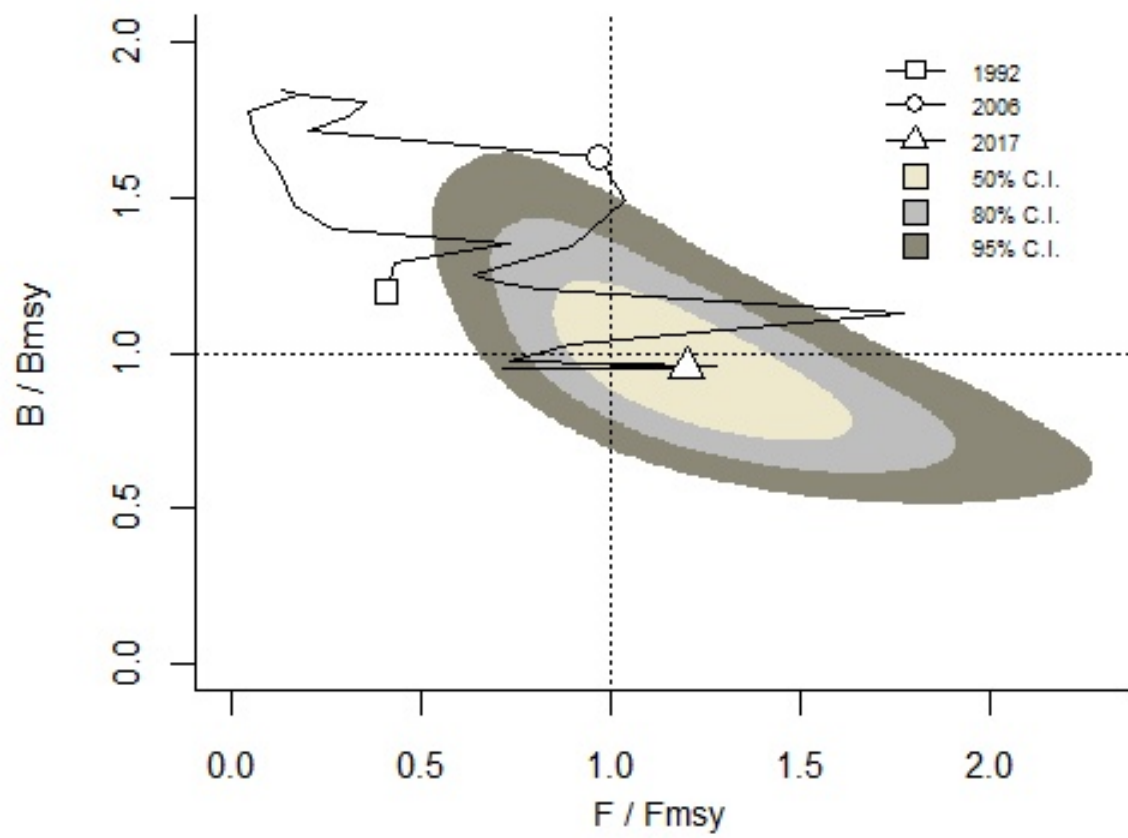

**A: Catch Sardine\_Med**

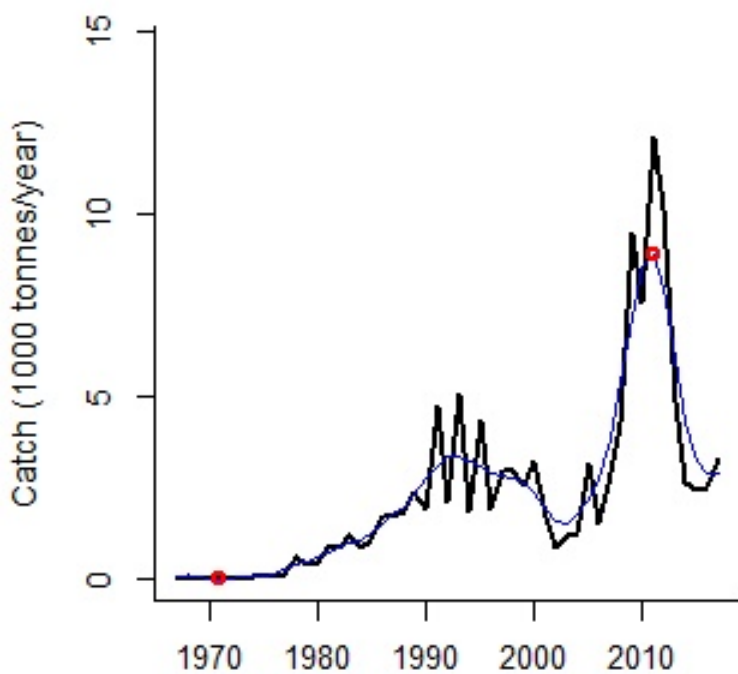

**B: Finding viable r-k**

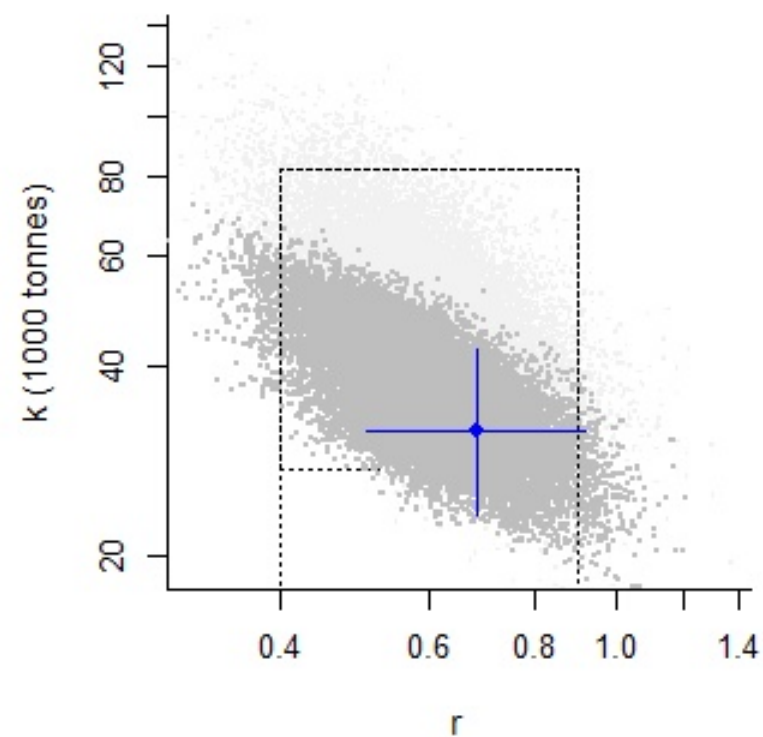

**C: Analysis of viable r-k**

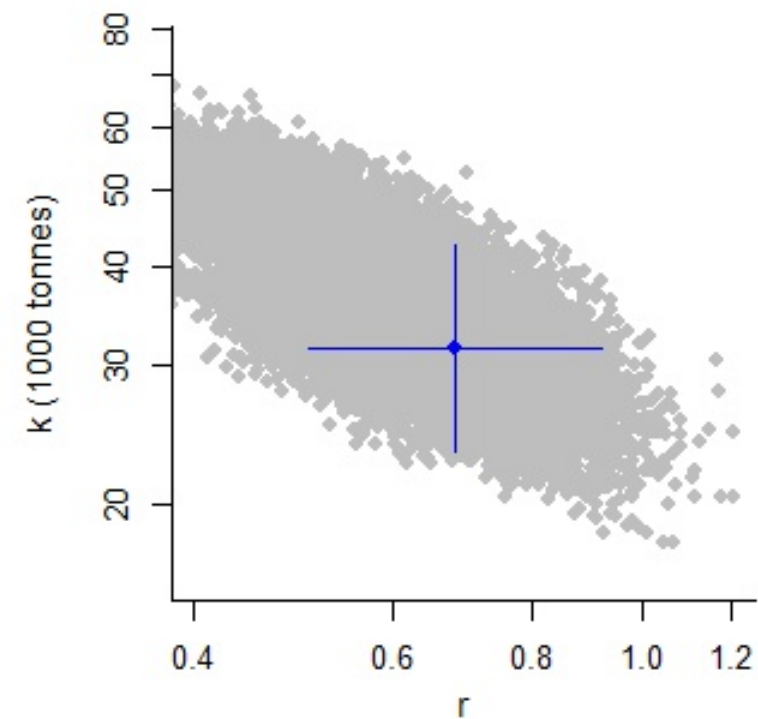

**D: Stock size**

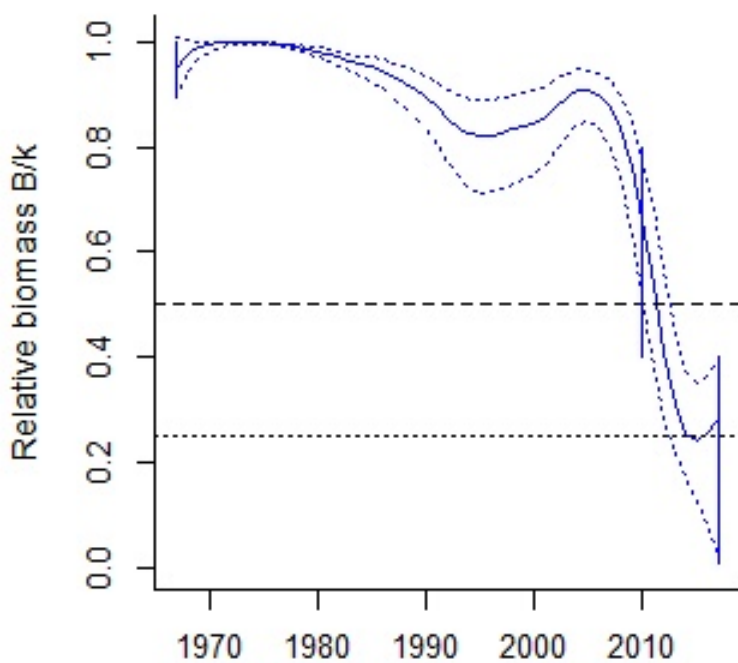

**E: Exploitation rate**

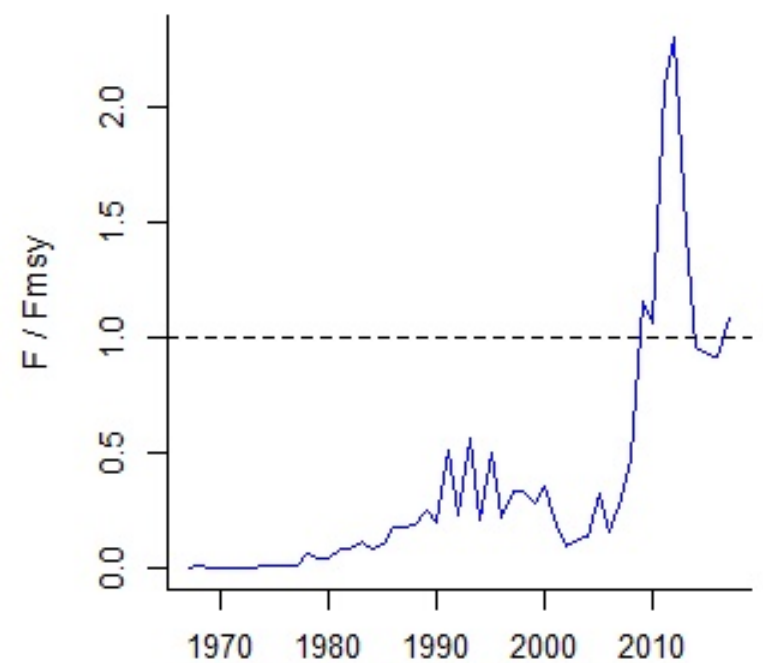

**F: Equilibrium curve**

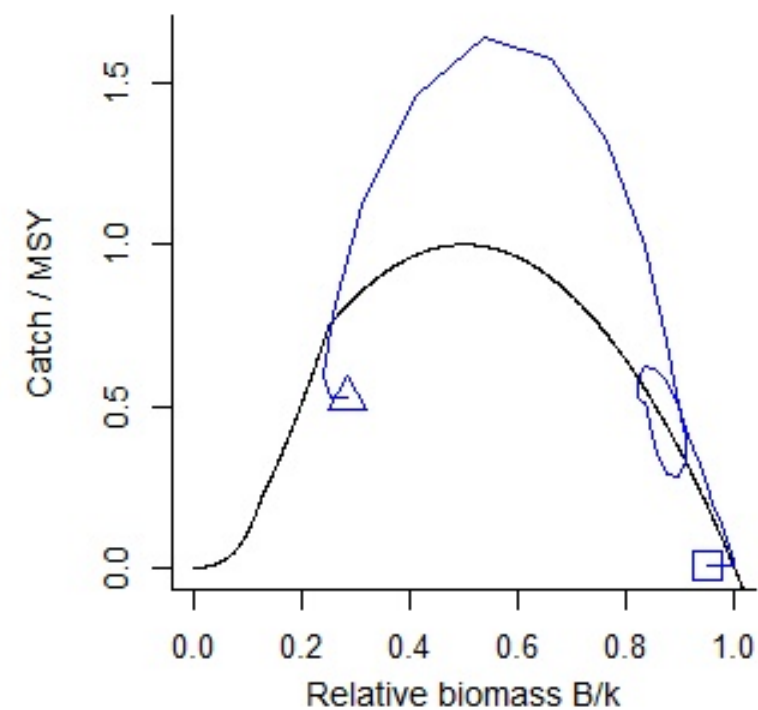

**Catch**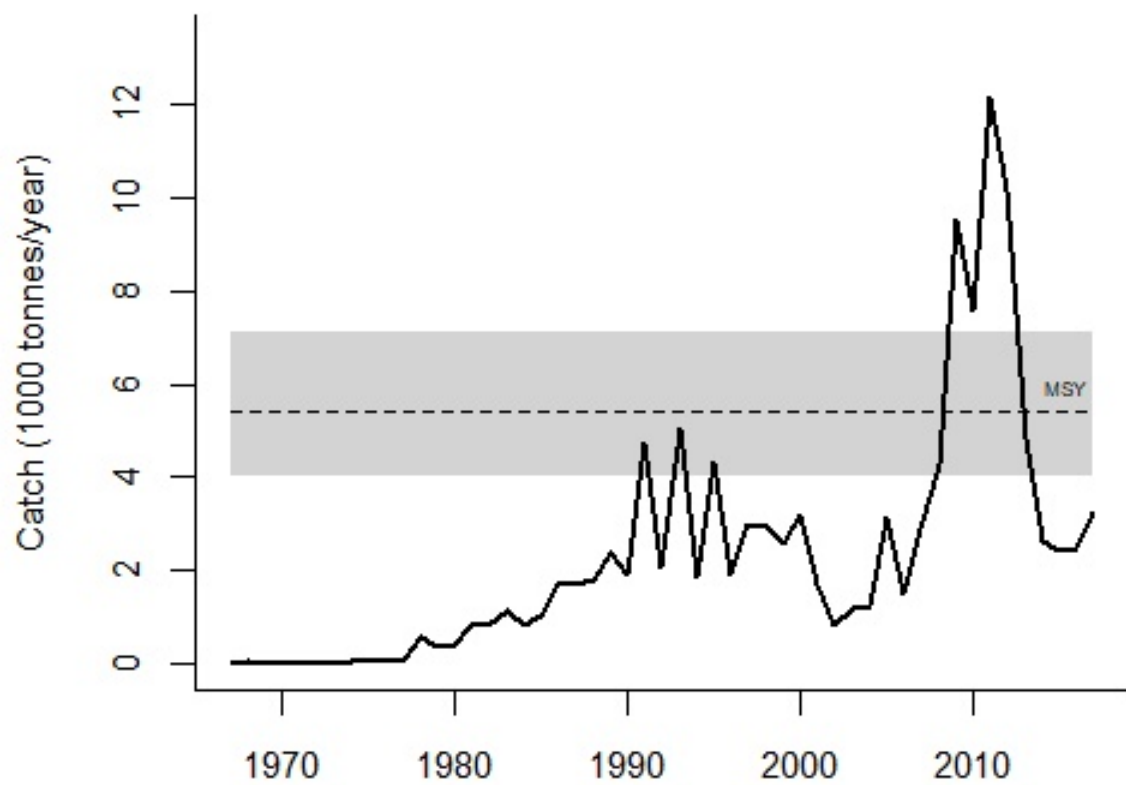**Stock size**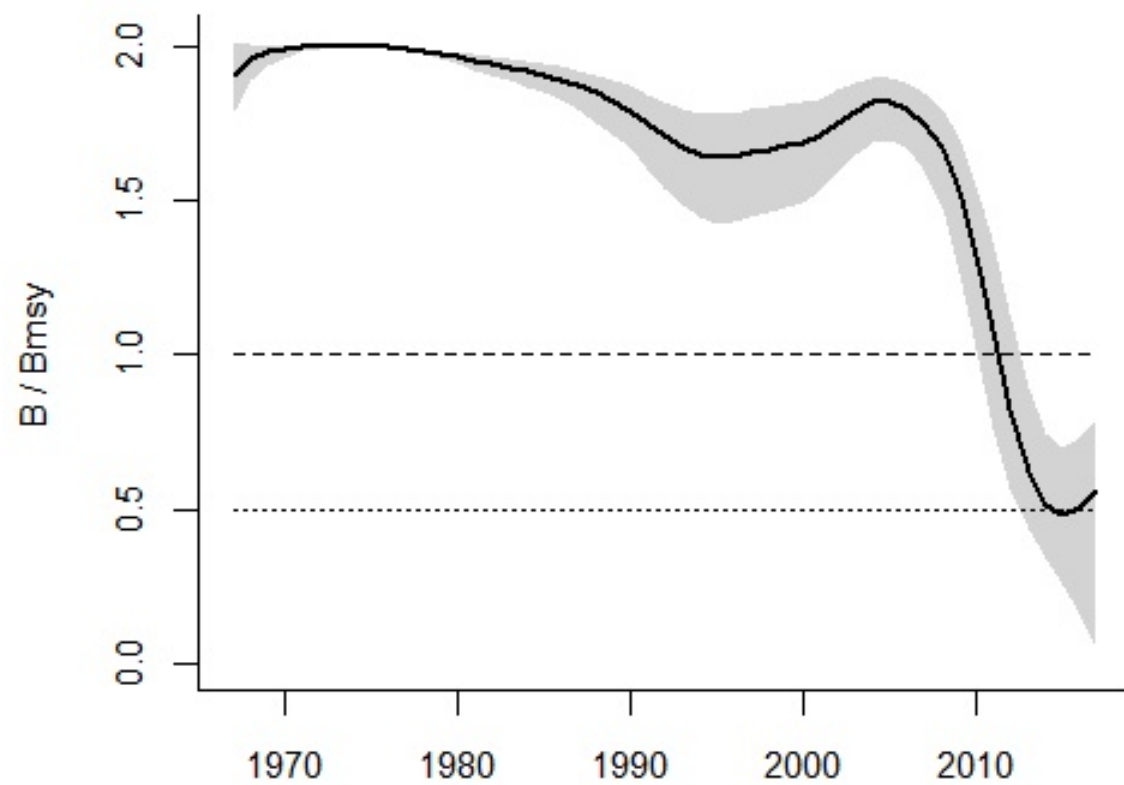**Exploitation**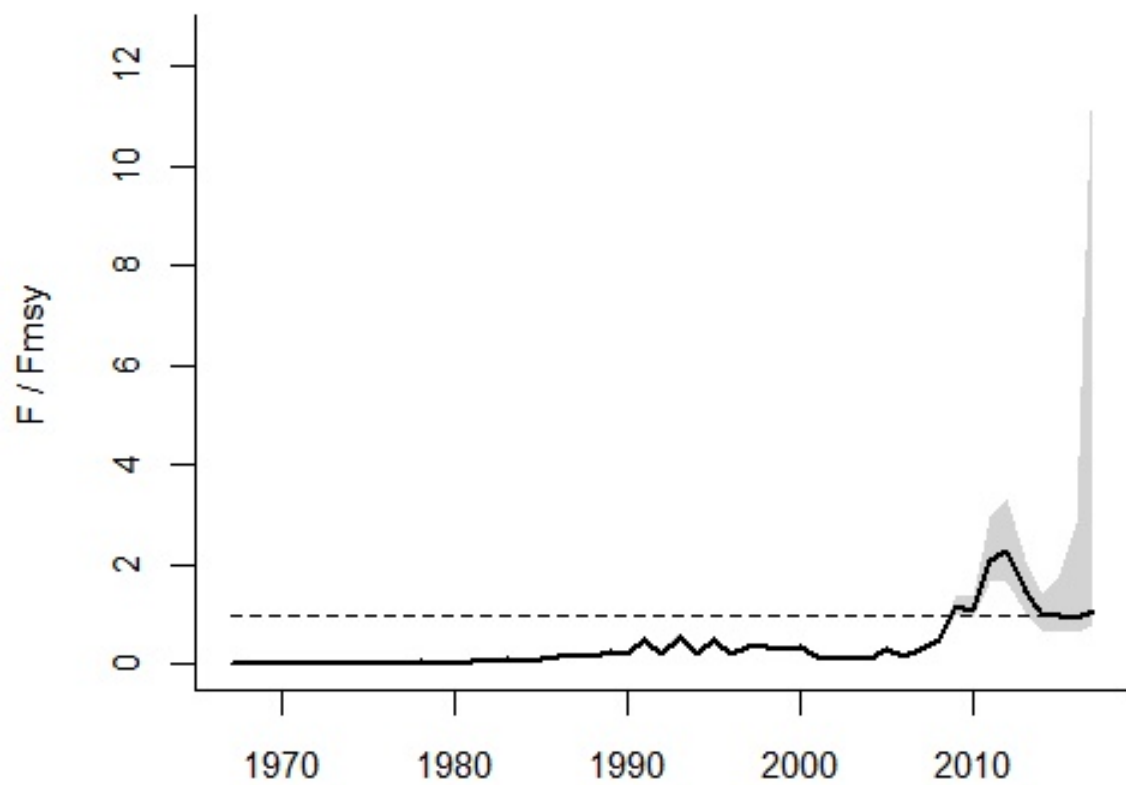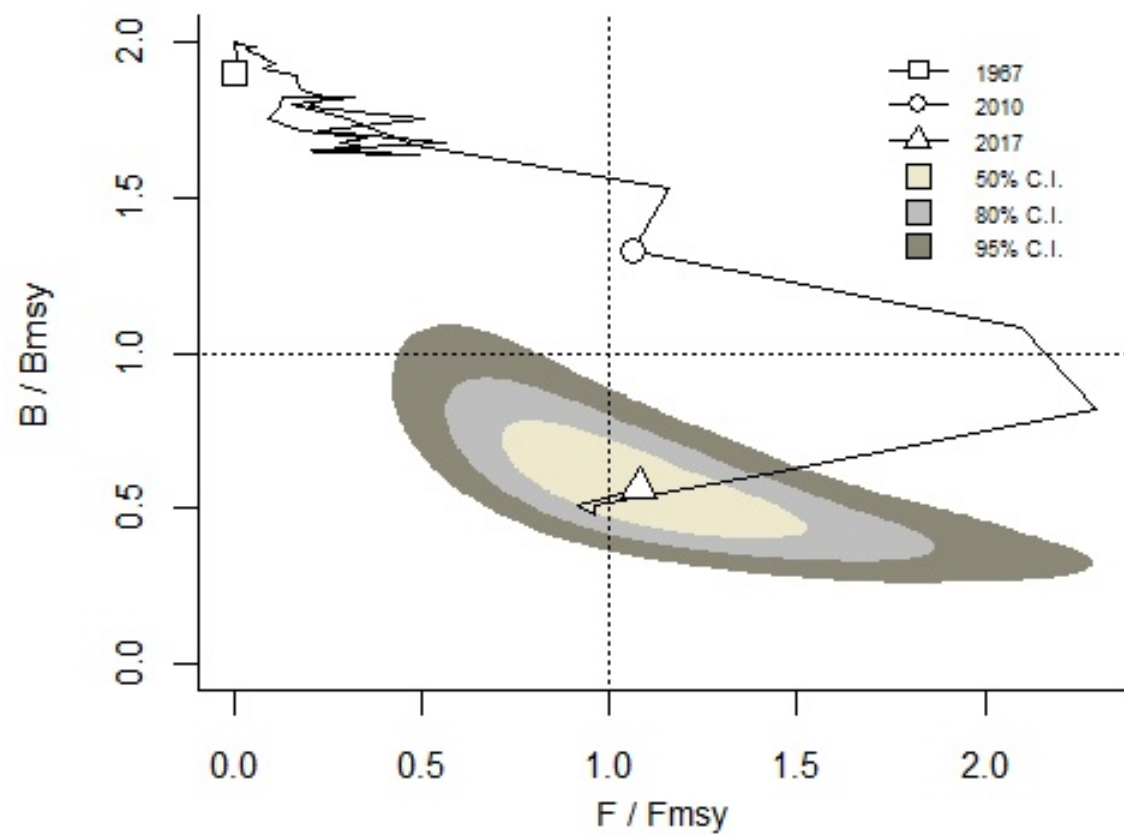

**A: Catch HorseMack\_Med**

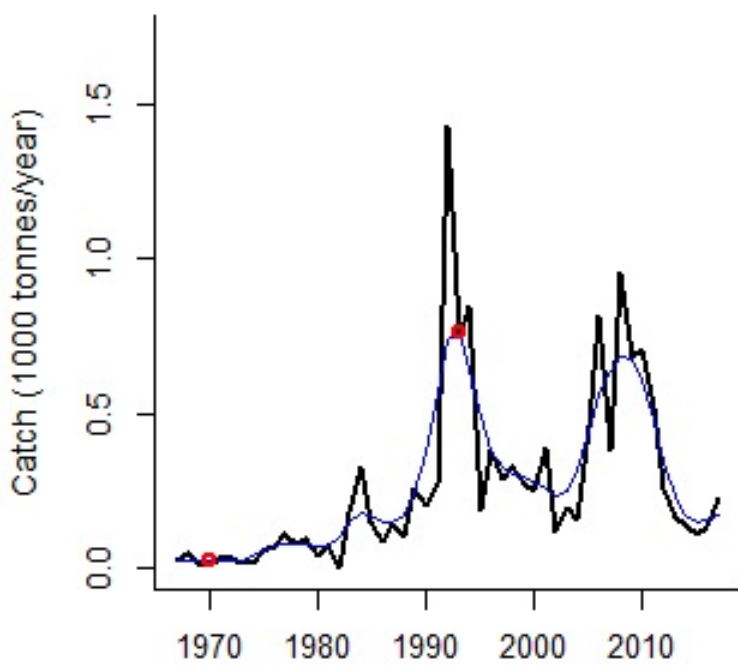

**B: Finding viable r-k**

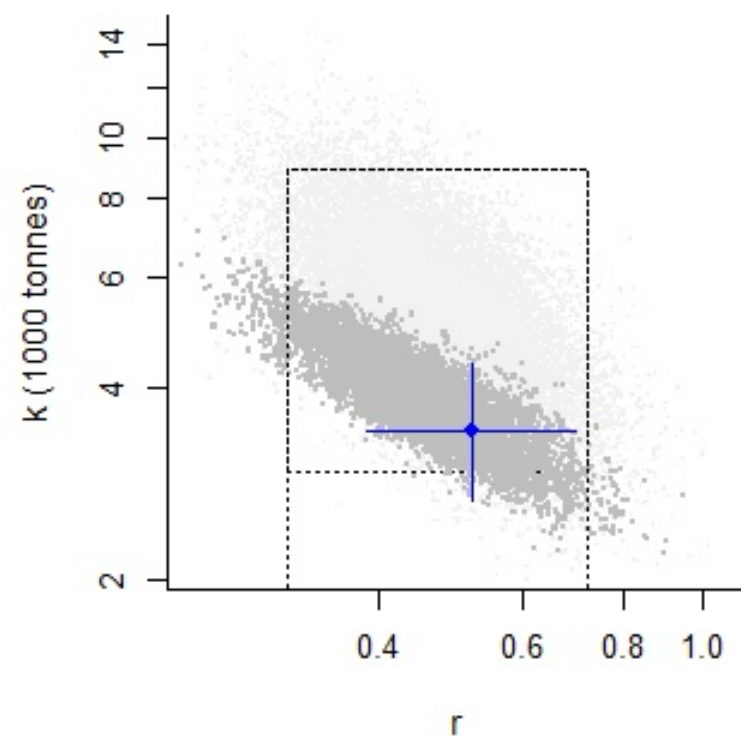

**C: Analysis of viable r-k**

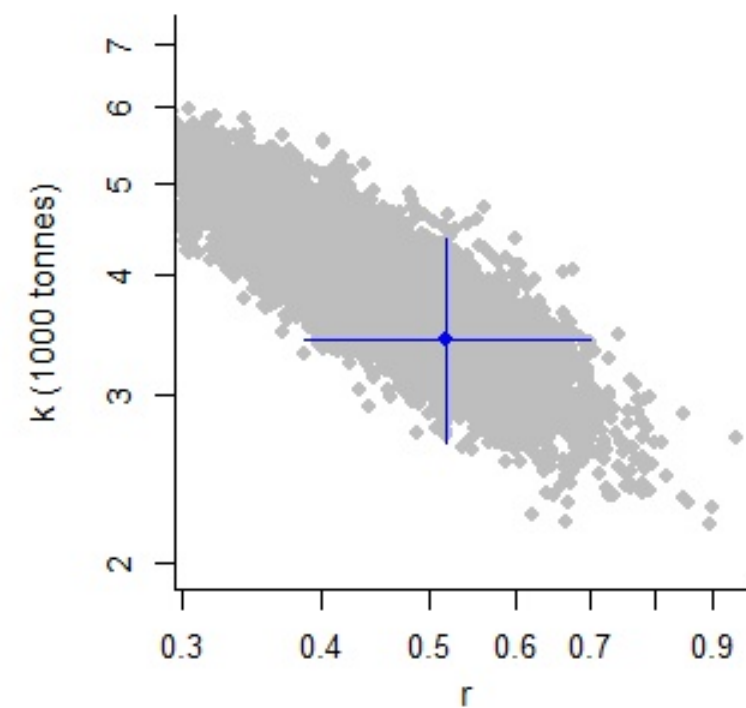

**D: Stock size**

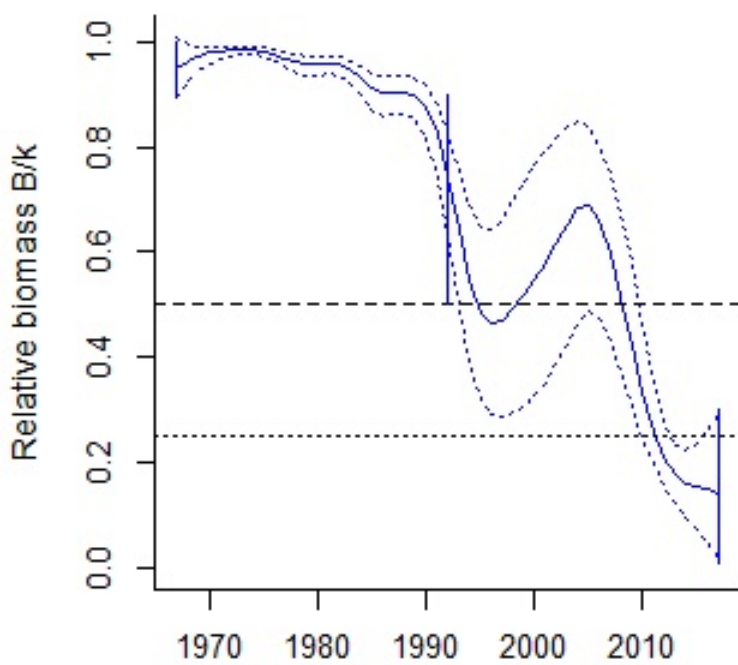

**E: Exploitation rate**

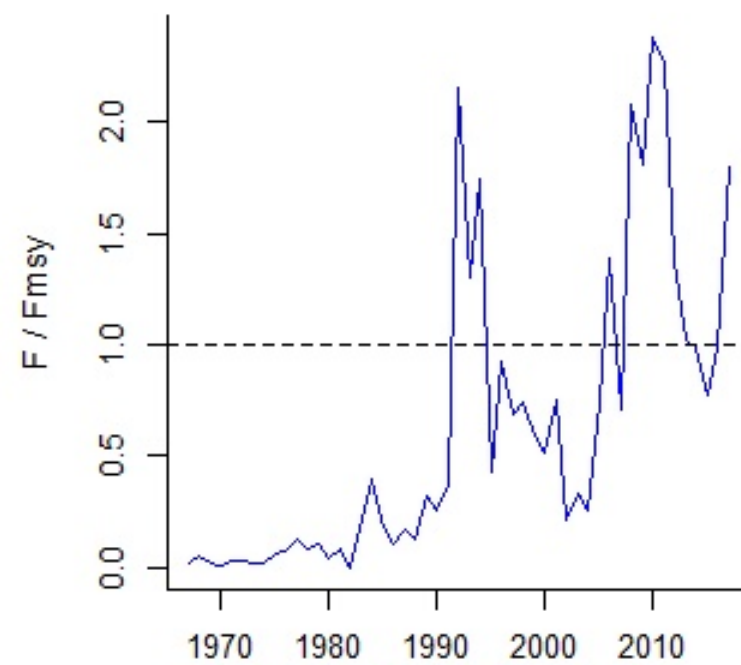

**F: Equilibrium curve**

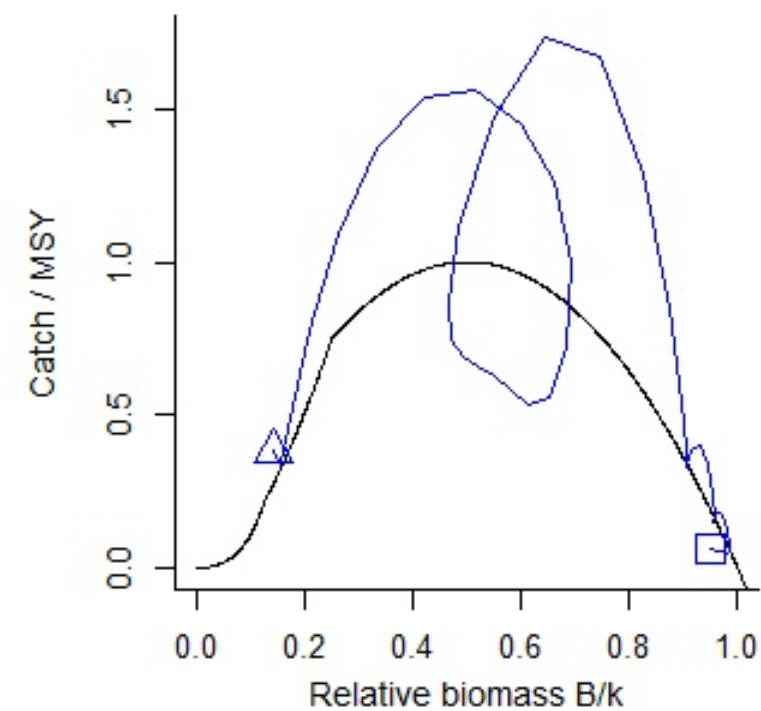



**Catch**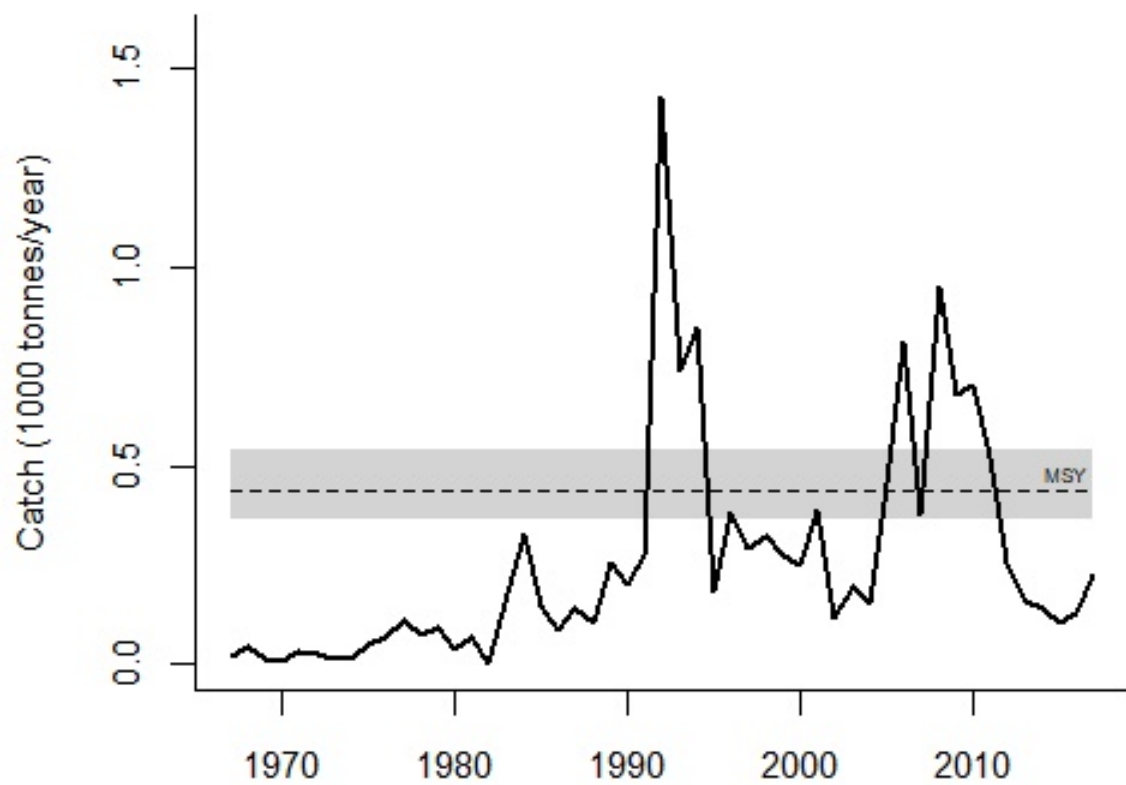**Stock size**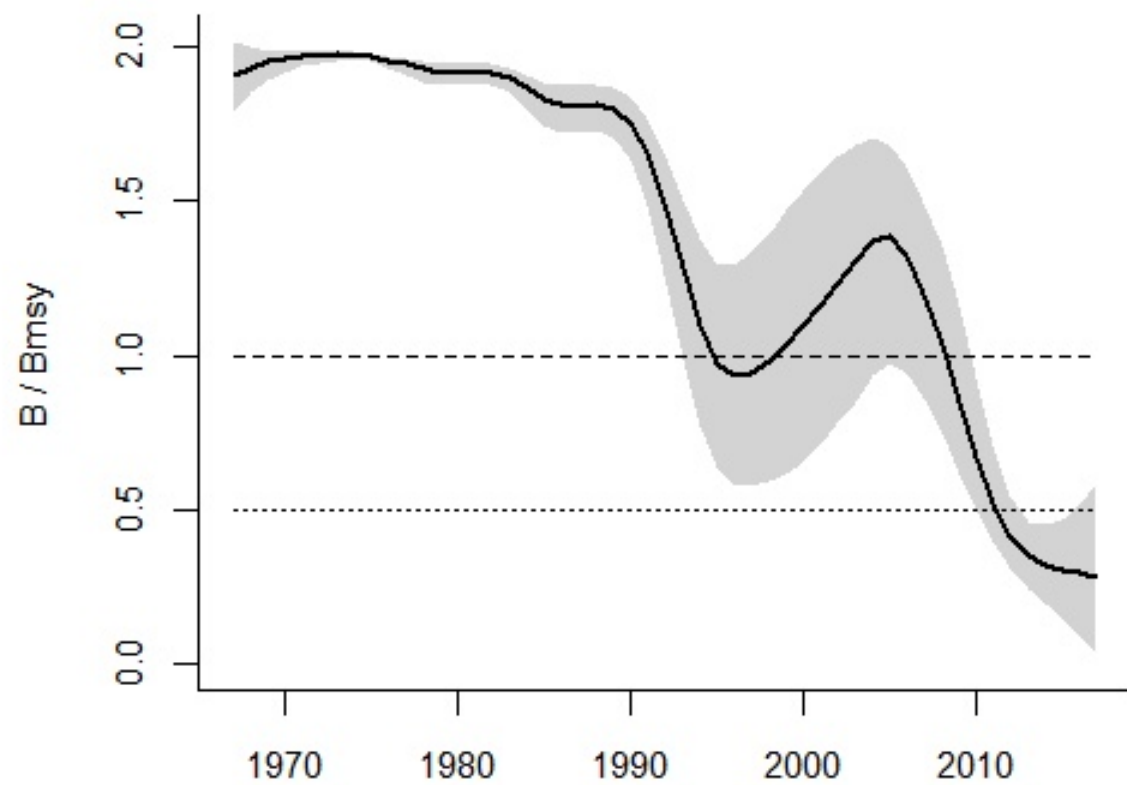**Exploitation**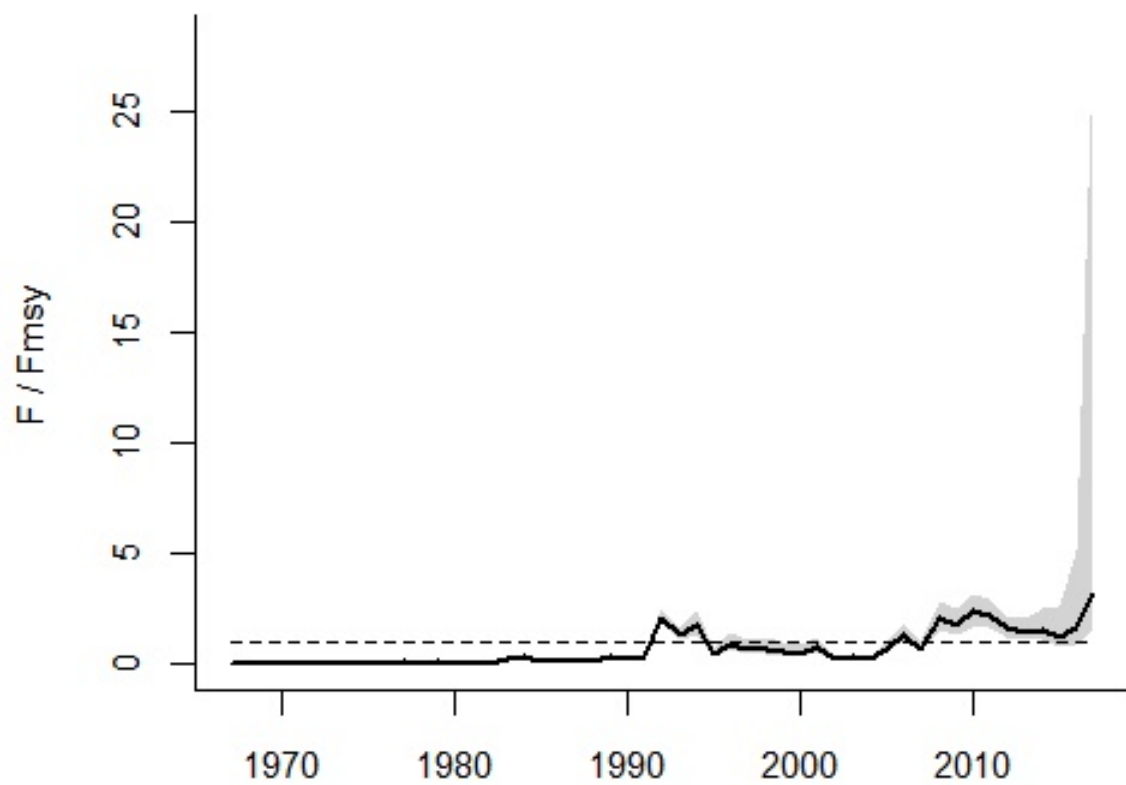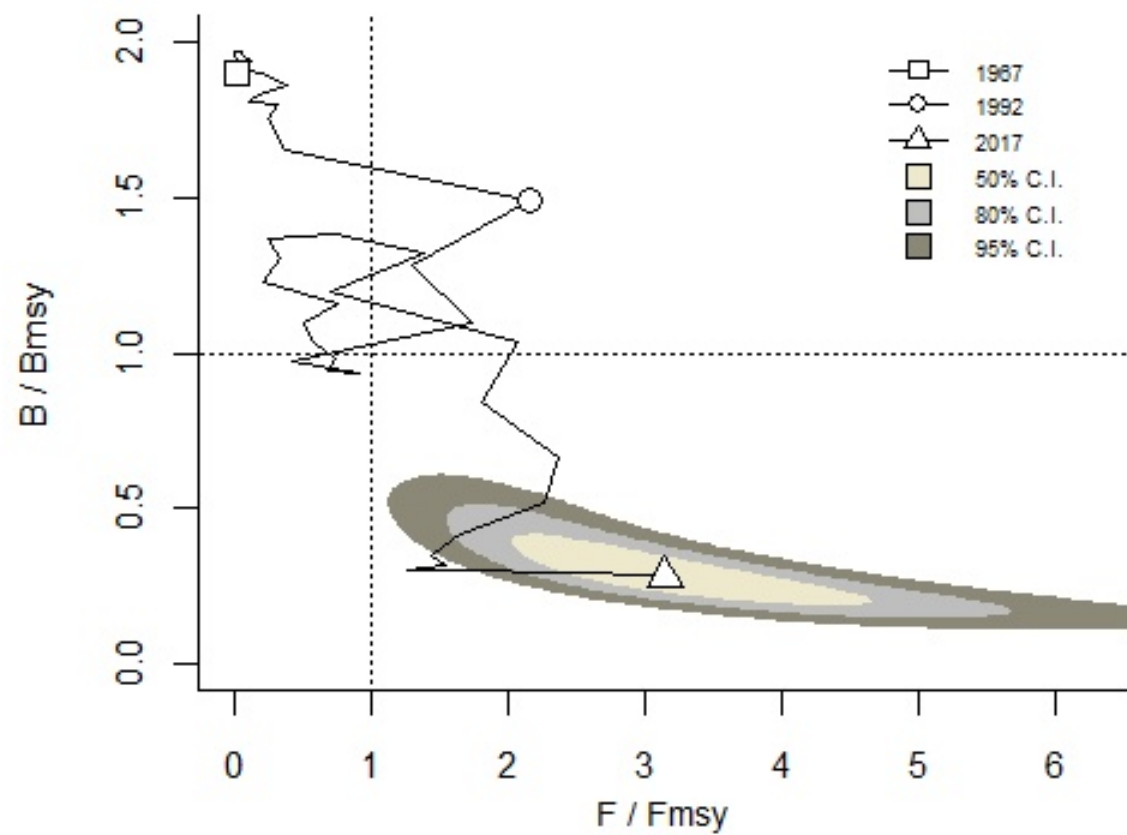

**A: Catch MedHMack\_Med**

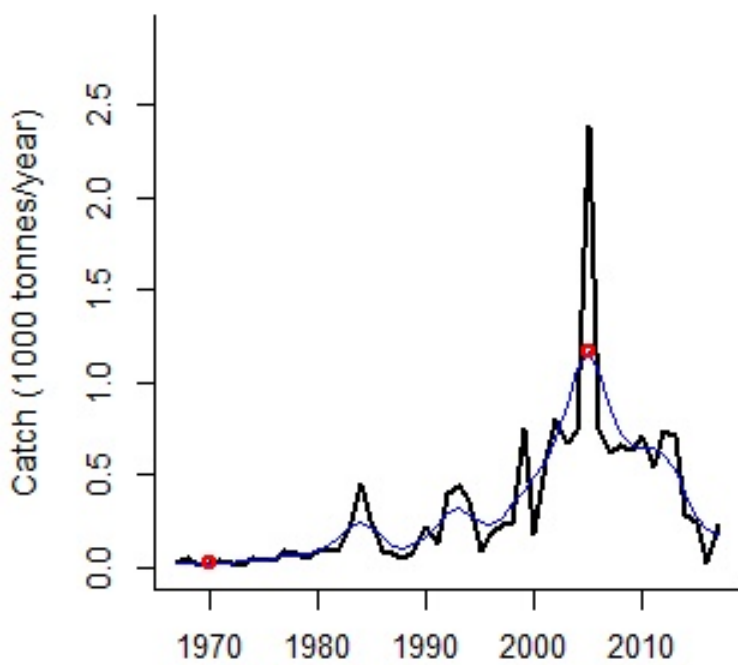

**B: Finding viable r-k**

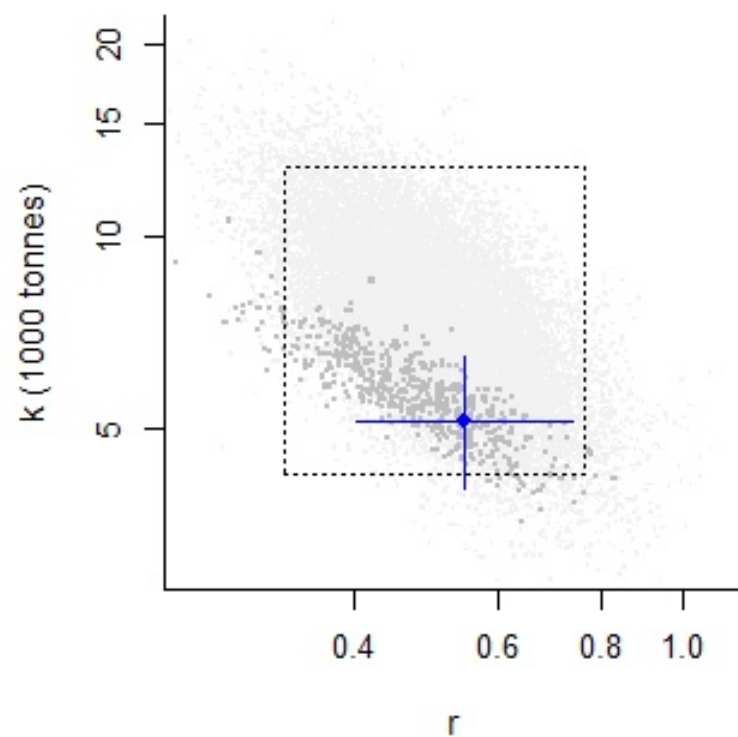

**C: Analysis of viable r-k**

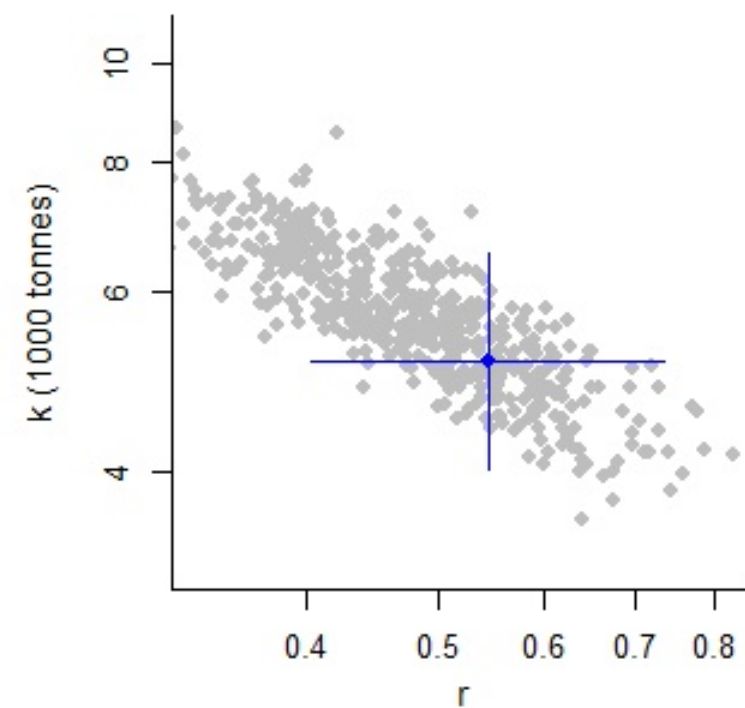

**D: Stock size**

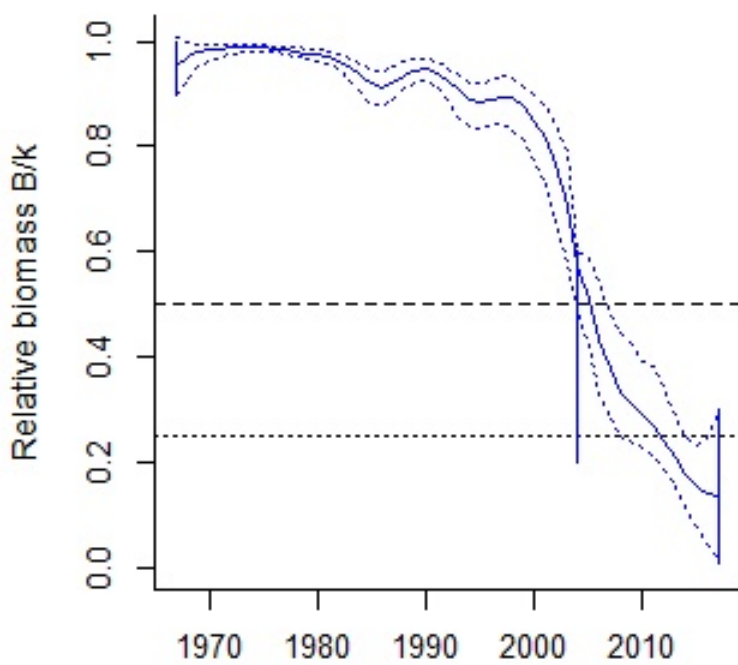

**E: Exploitation rate**

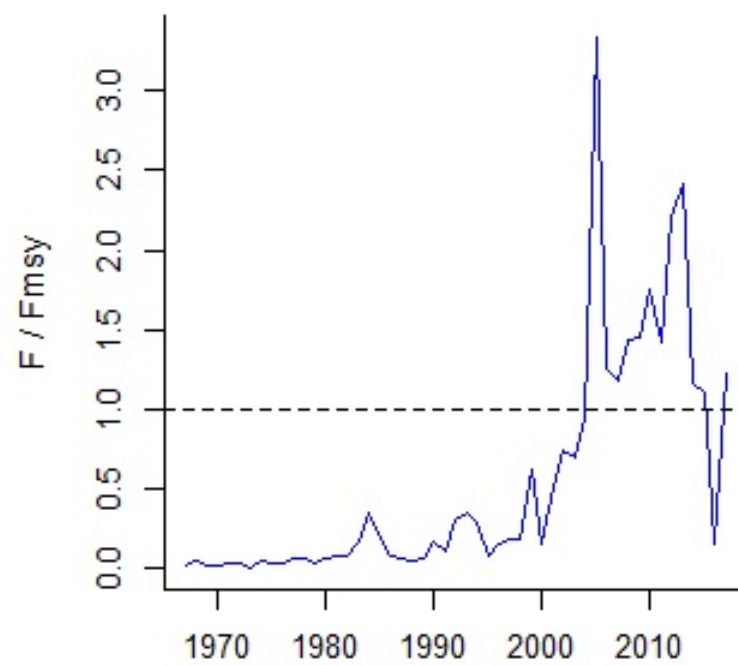

**F: Equilibrium curve**

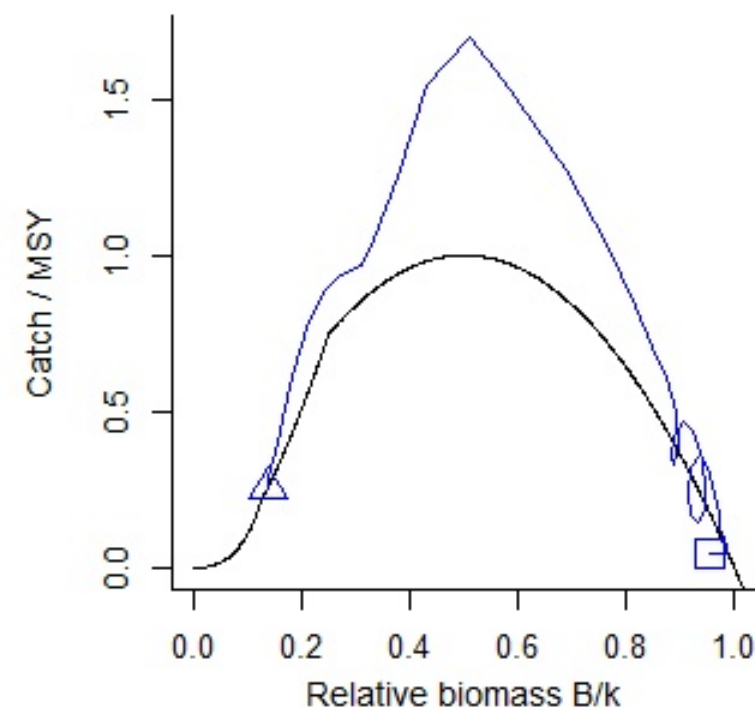

**Catch**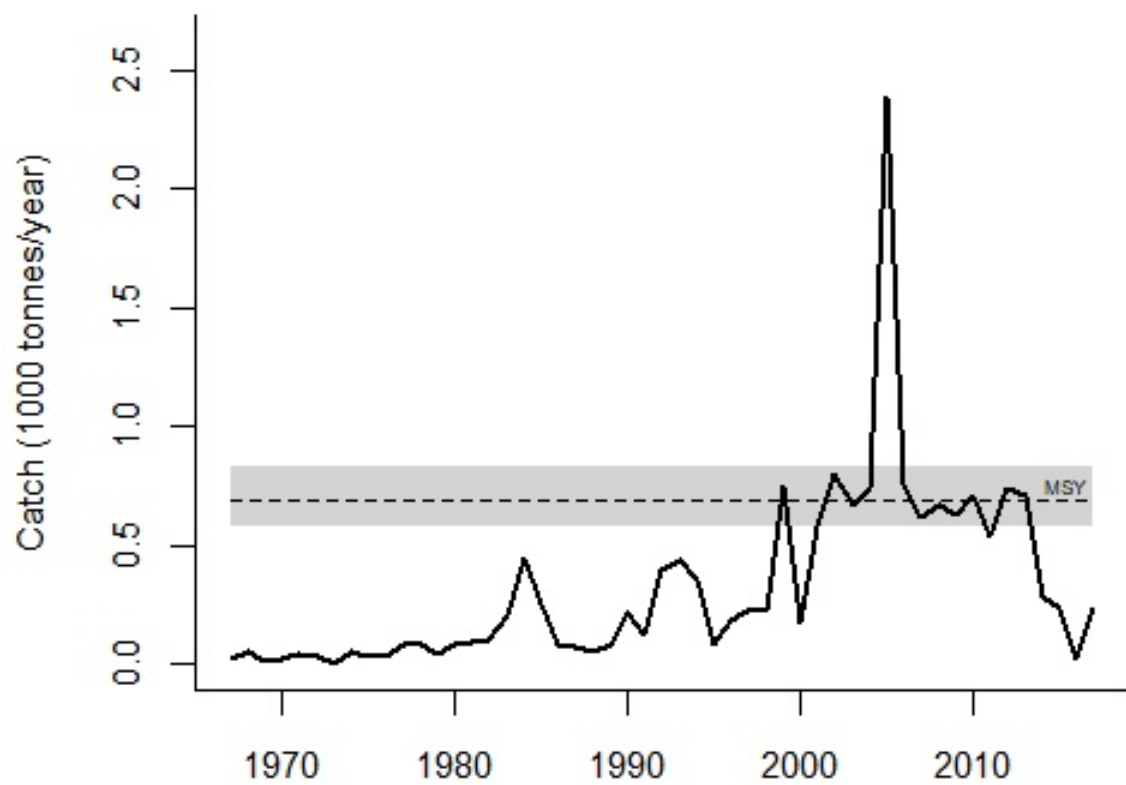**Stock size**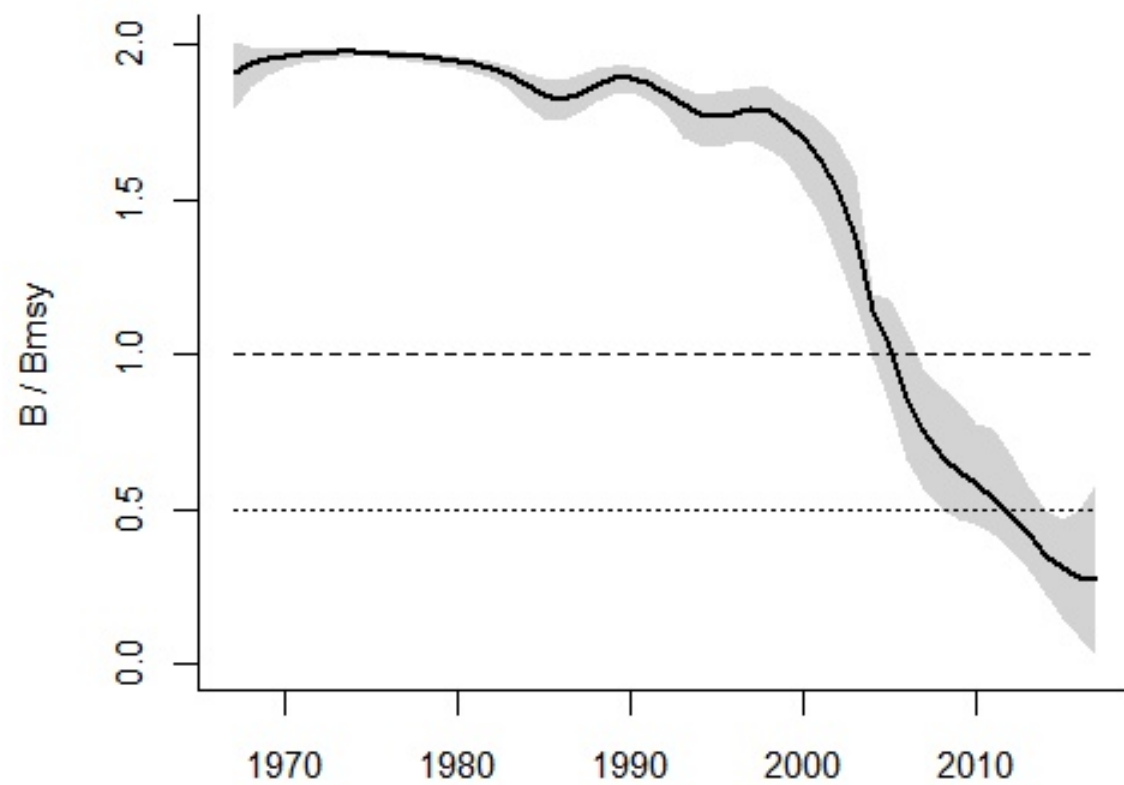**Exploitation**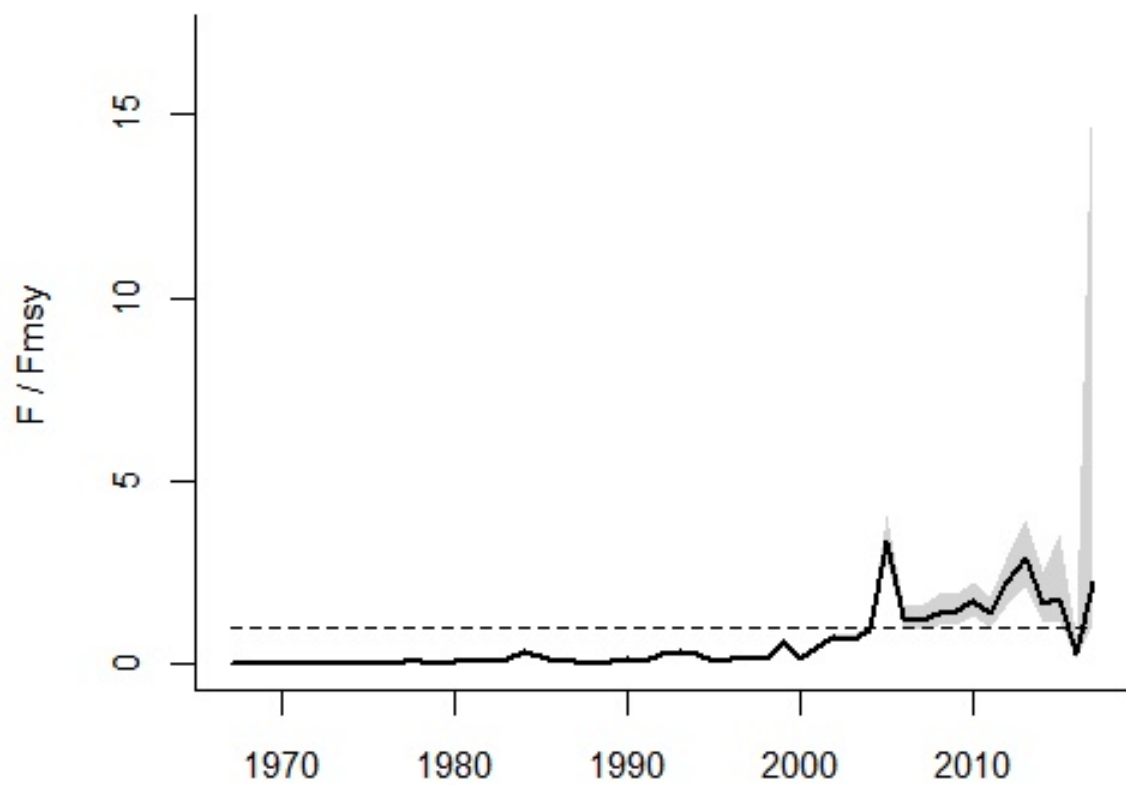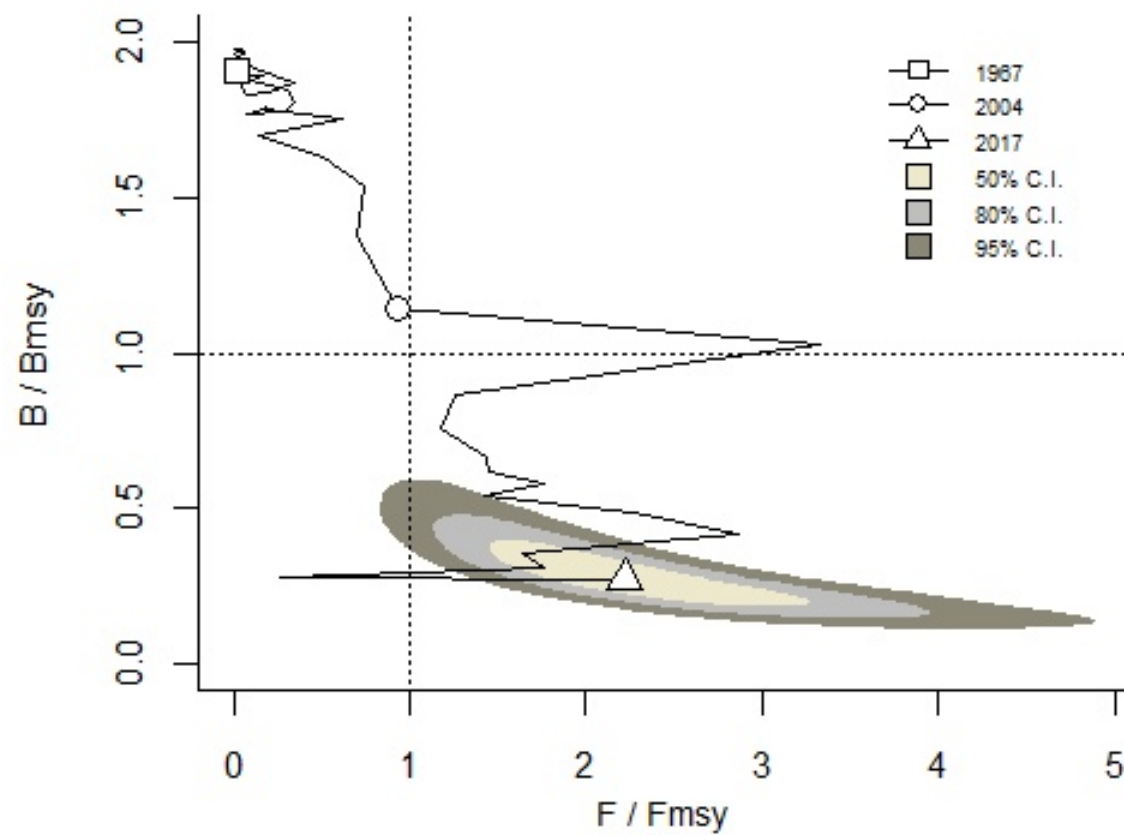

**A: Catch Bogue\_Med**

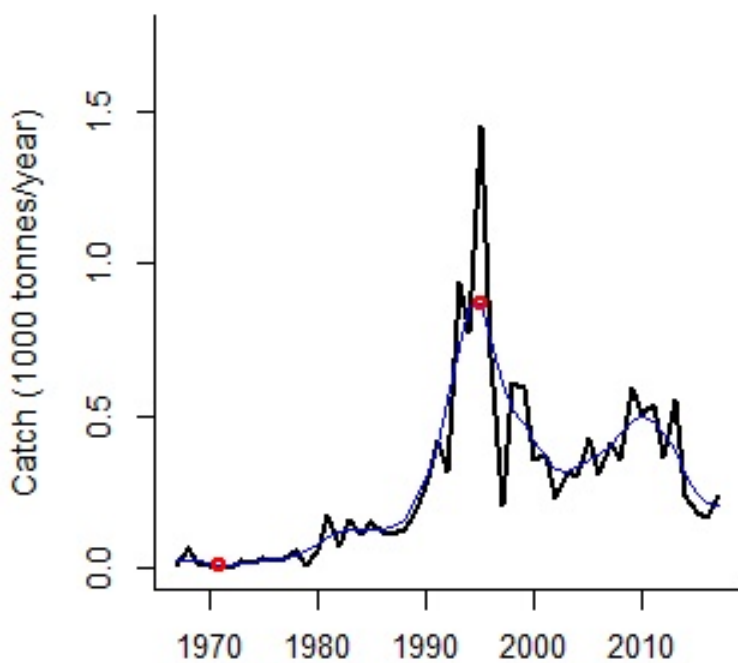

**B: Finding viable r-k**

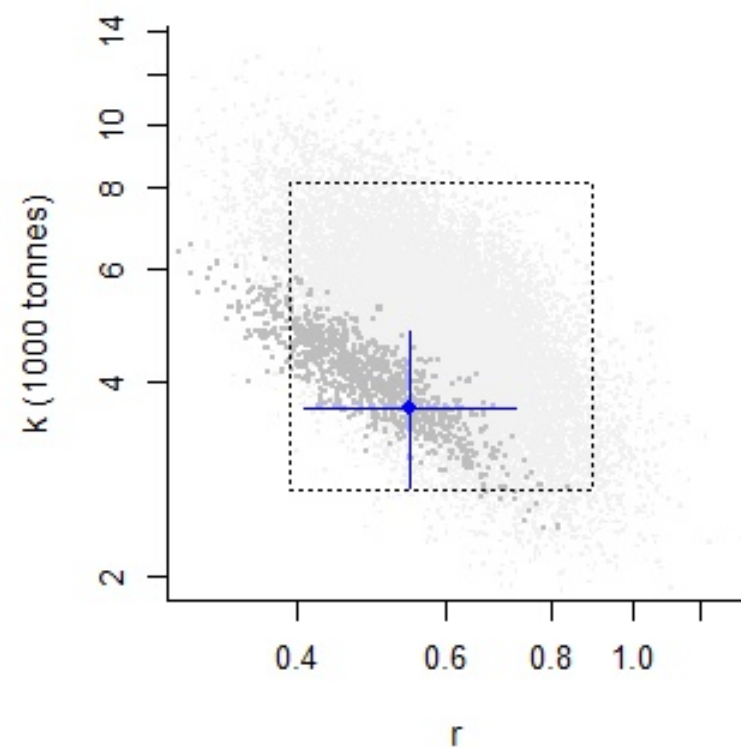

**C: Analysis of viable r-k**

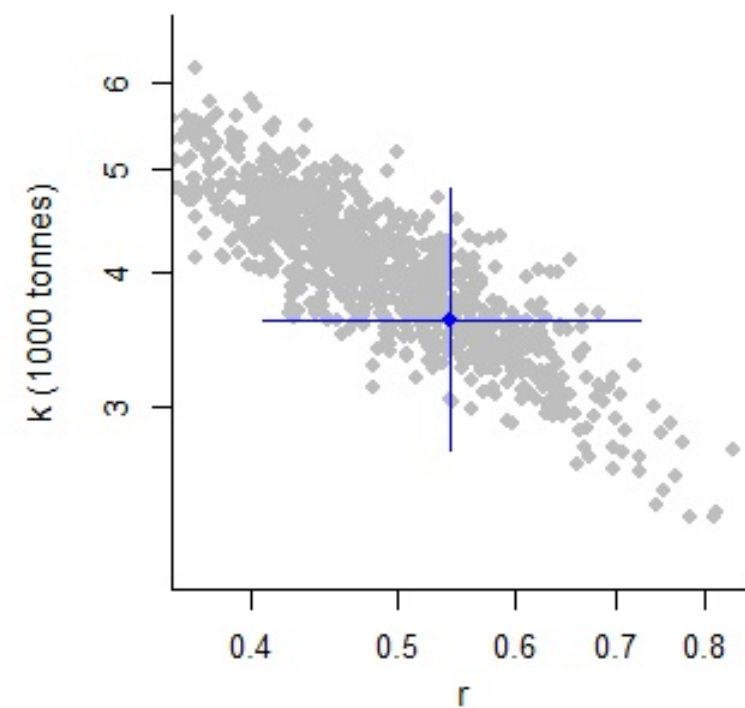

**D: Stock size**

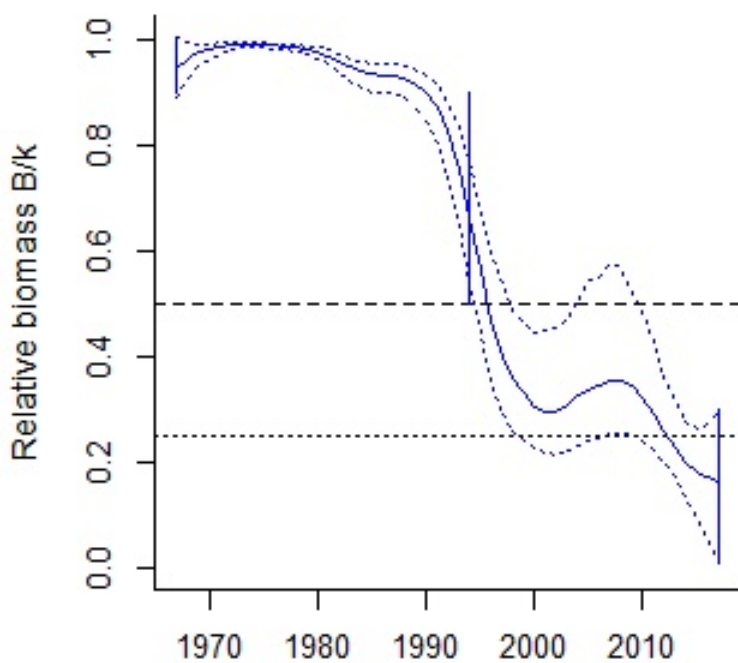

**E: Exploitation rate**

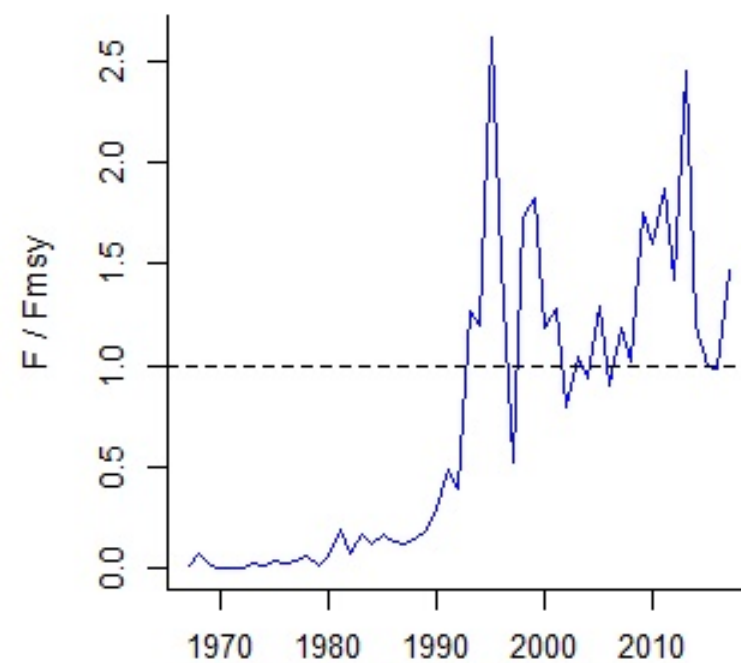

**F: Equilibrium curve**

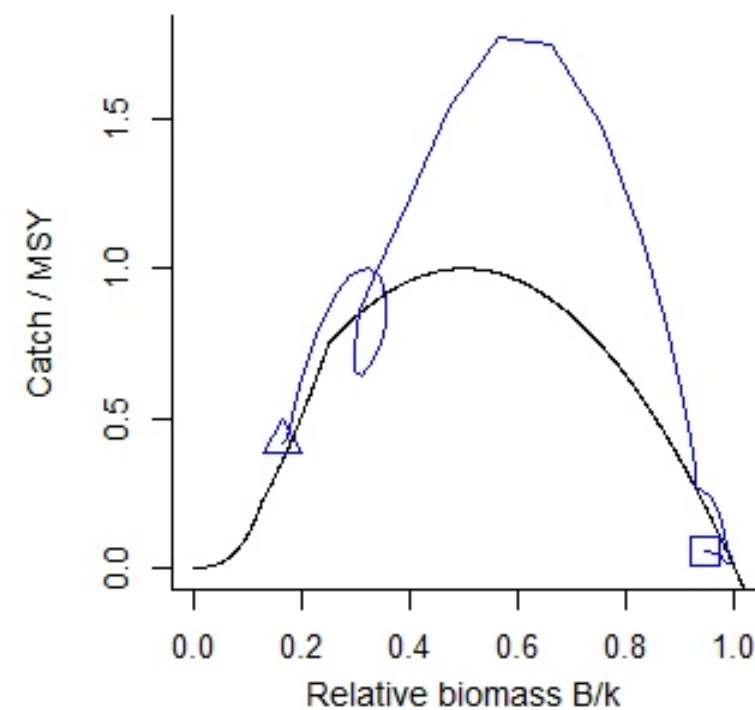



**Catch**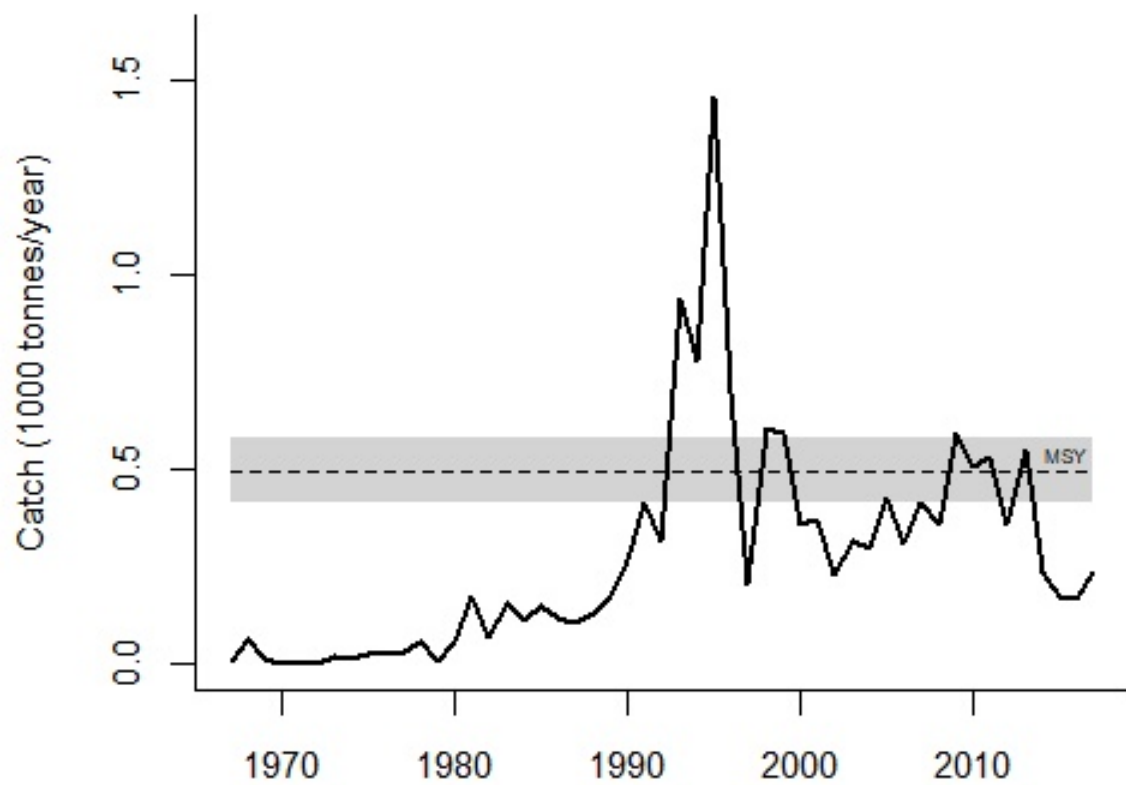**Stock size**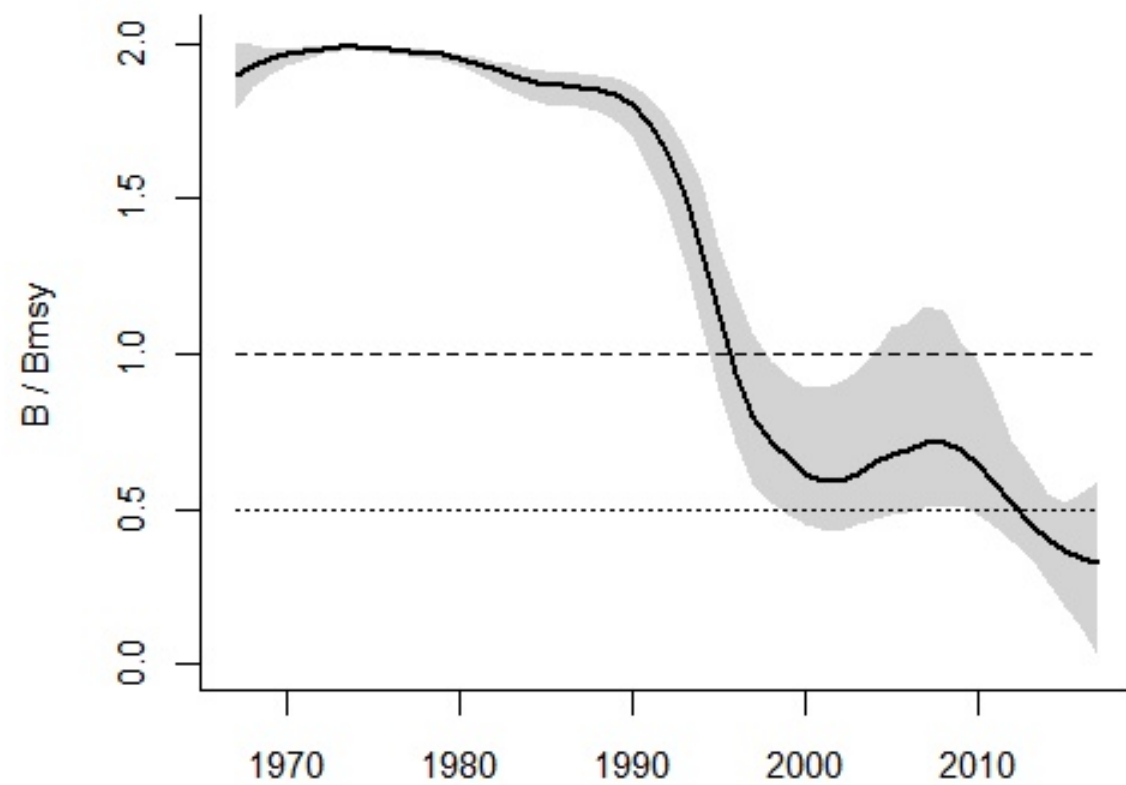**Exploitation**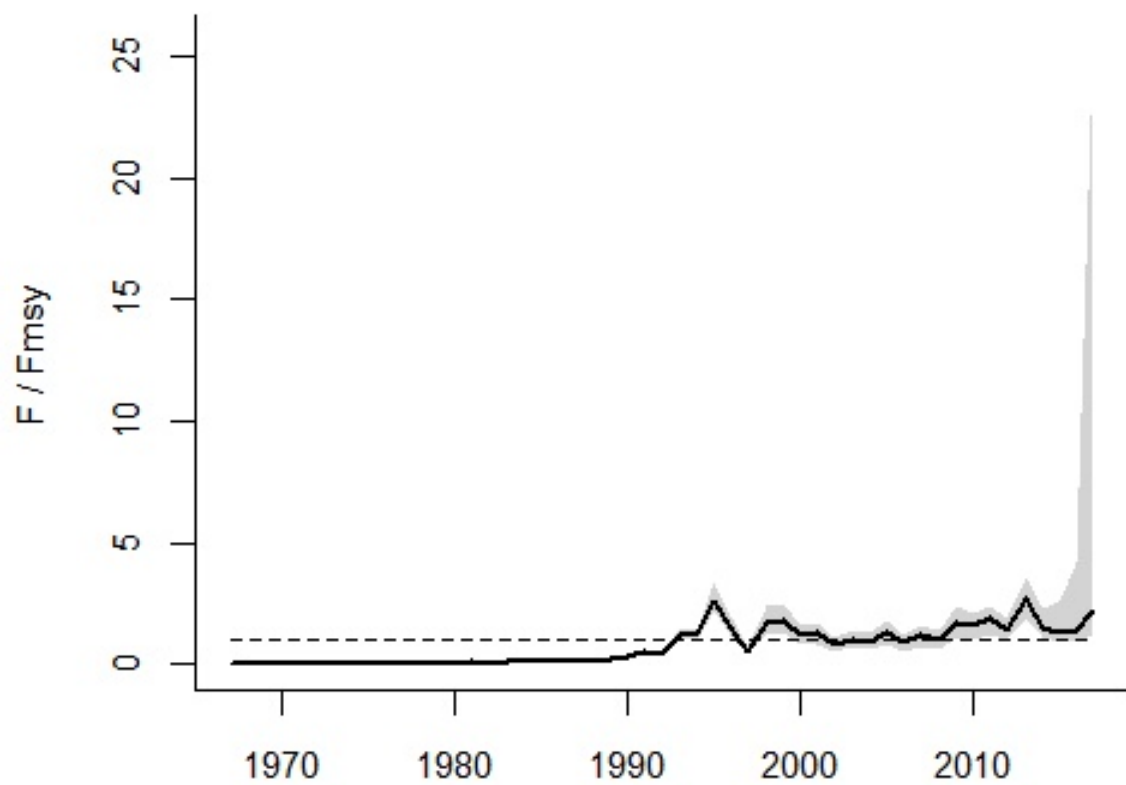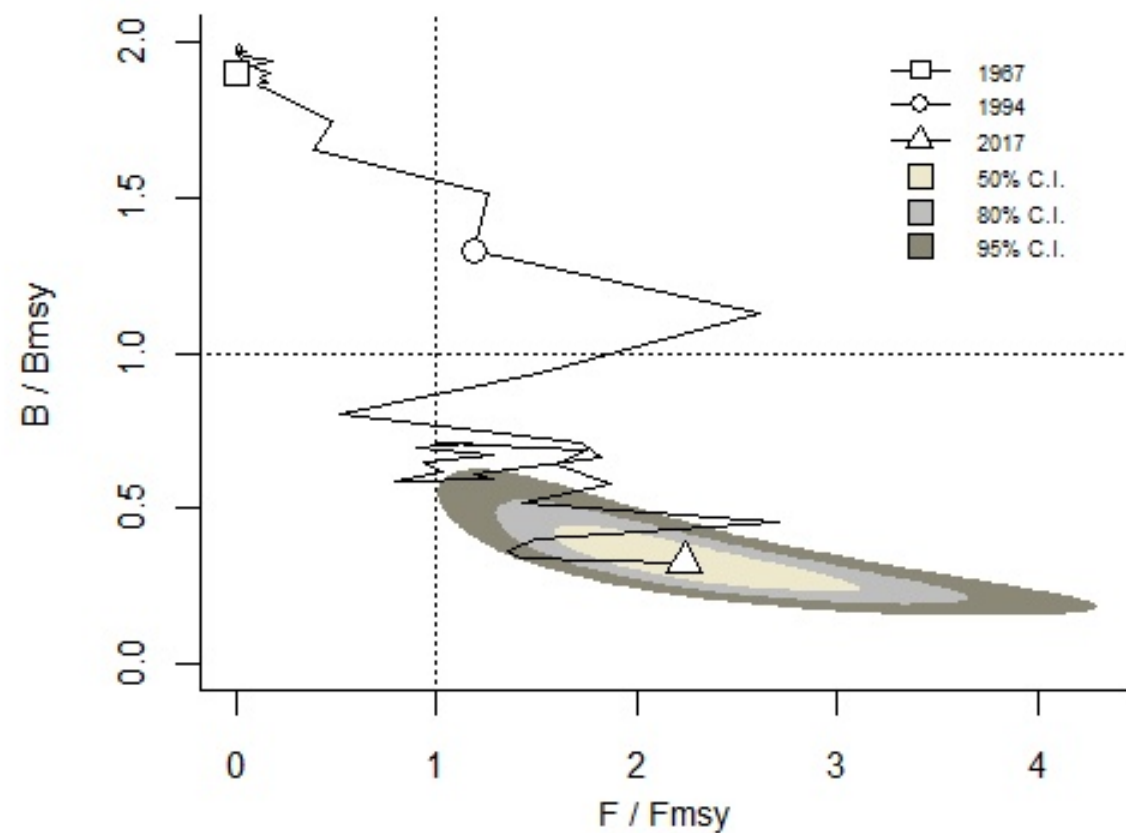

**A: Catch Bonito\_Med**

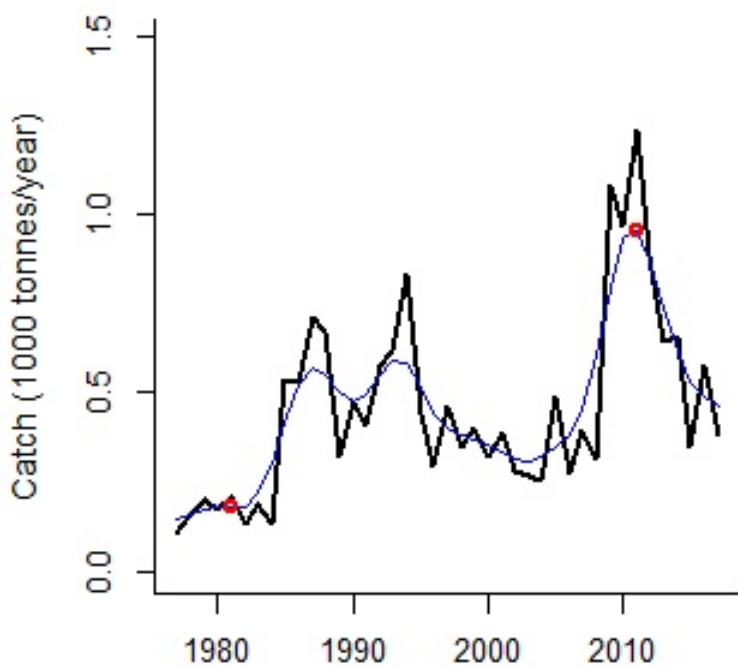

**B: Finding viable r-k**

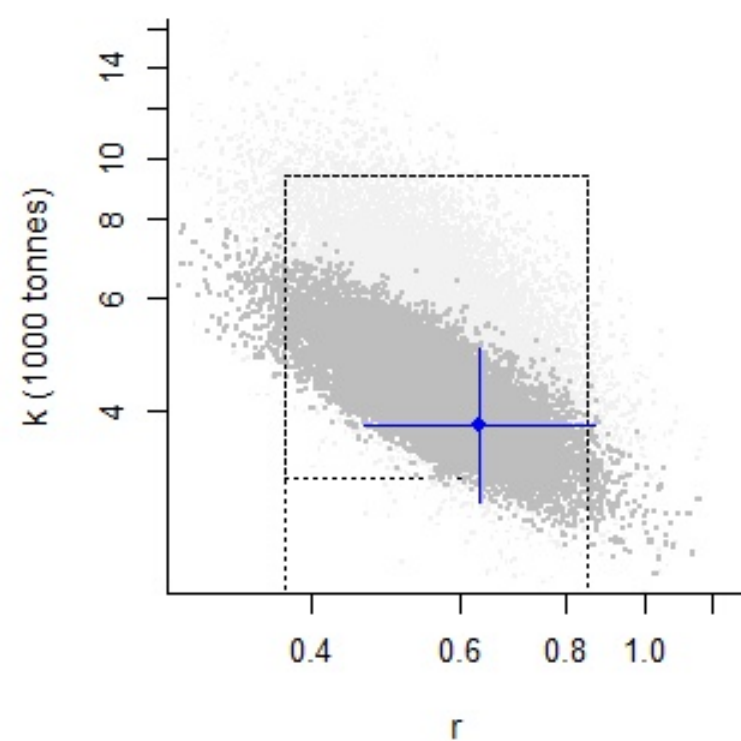

**C: Analysis of viable r-k**

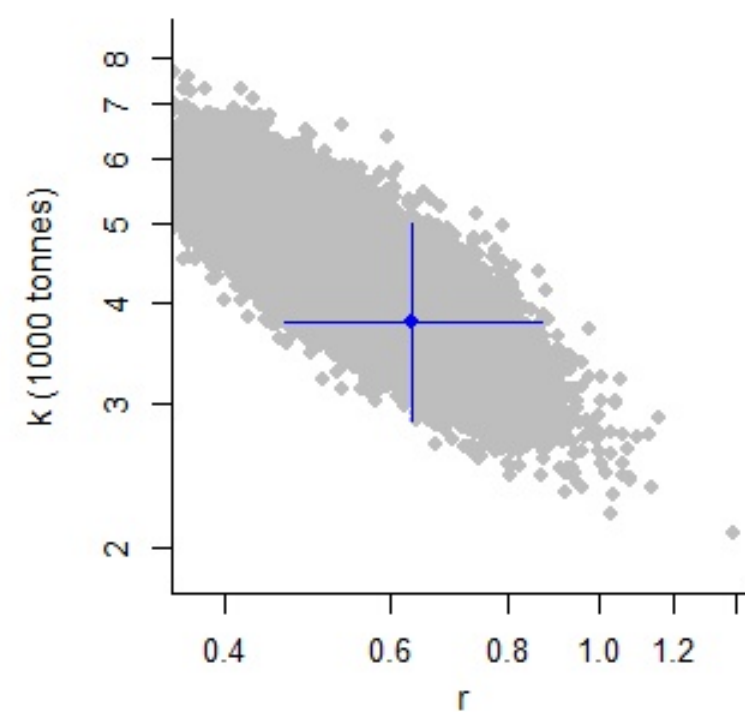

**D: Stock size**

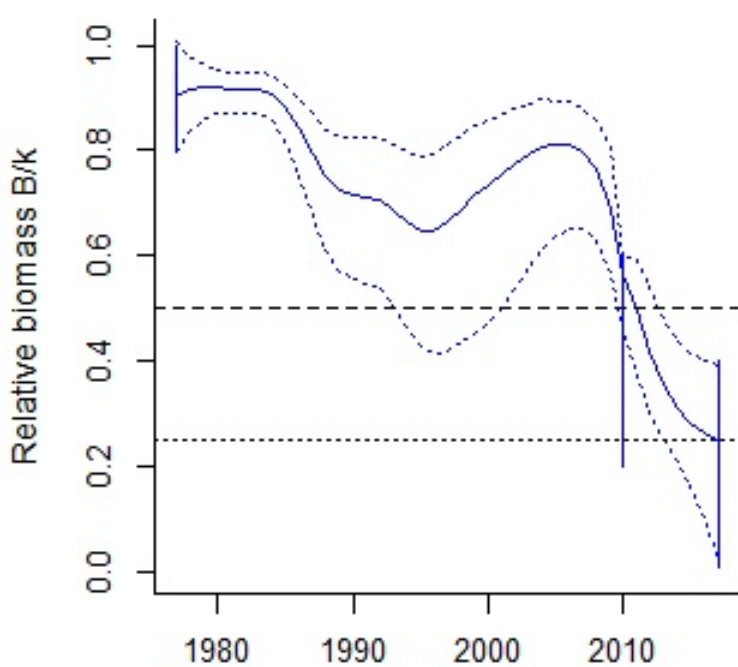

**E: Exploitation rate**

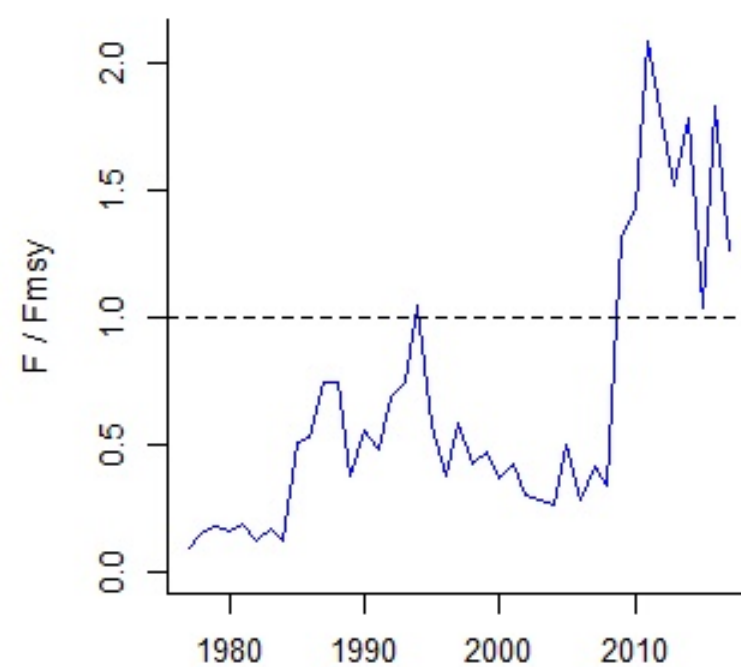

**F: Equilibrium curve**

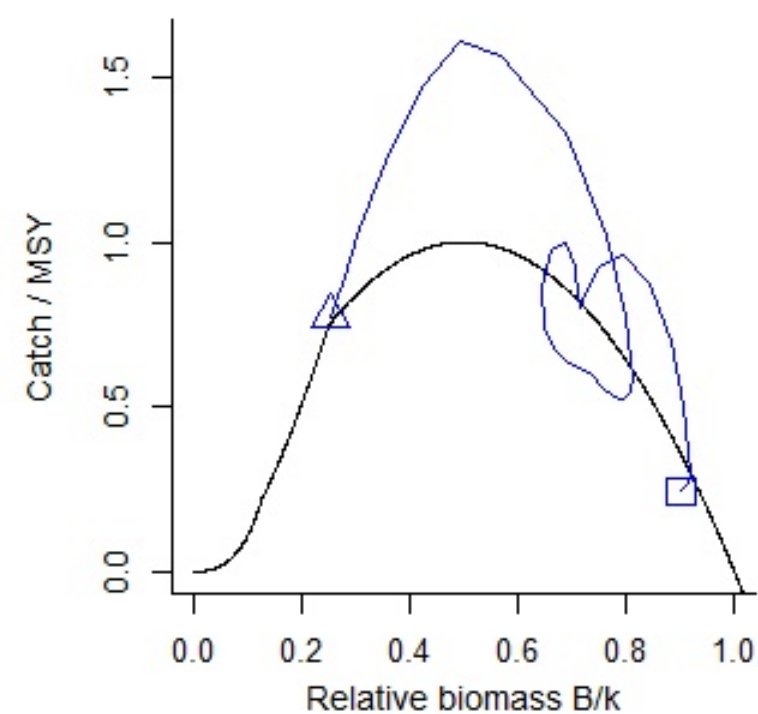

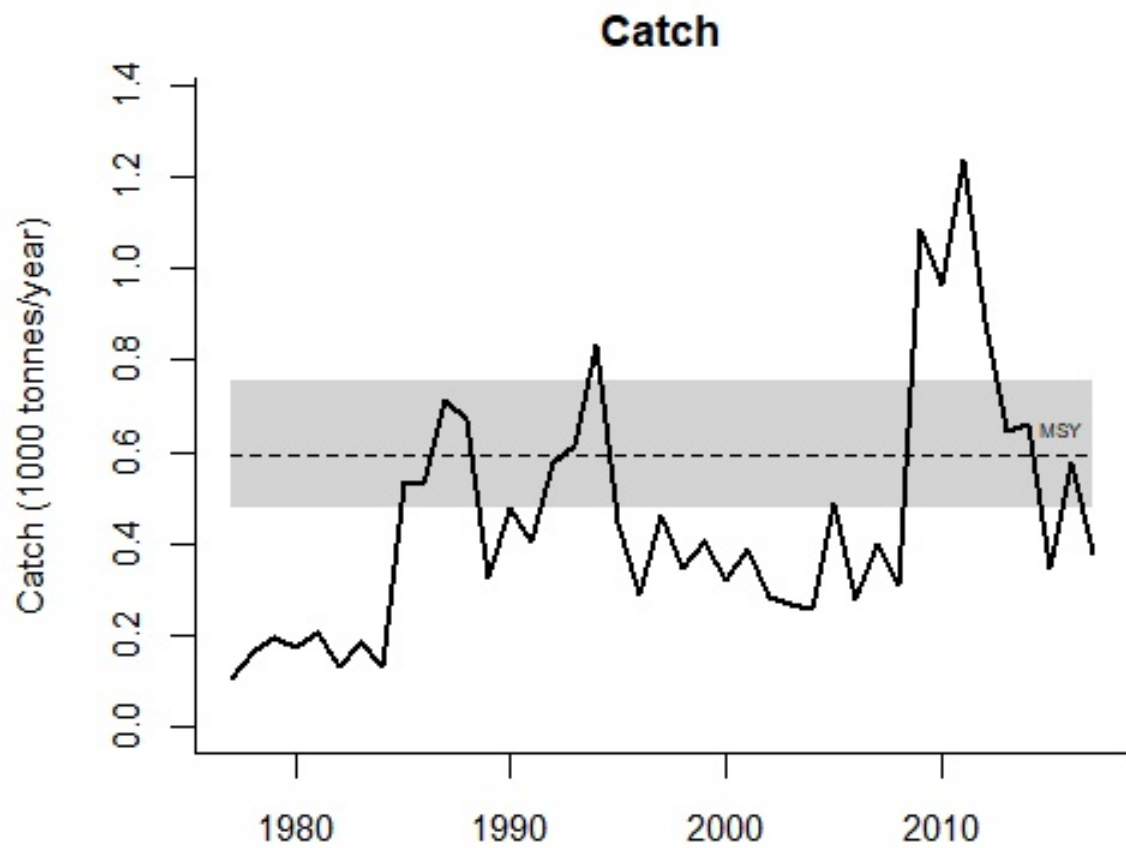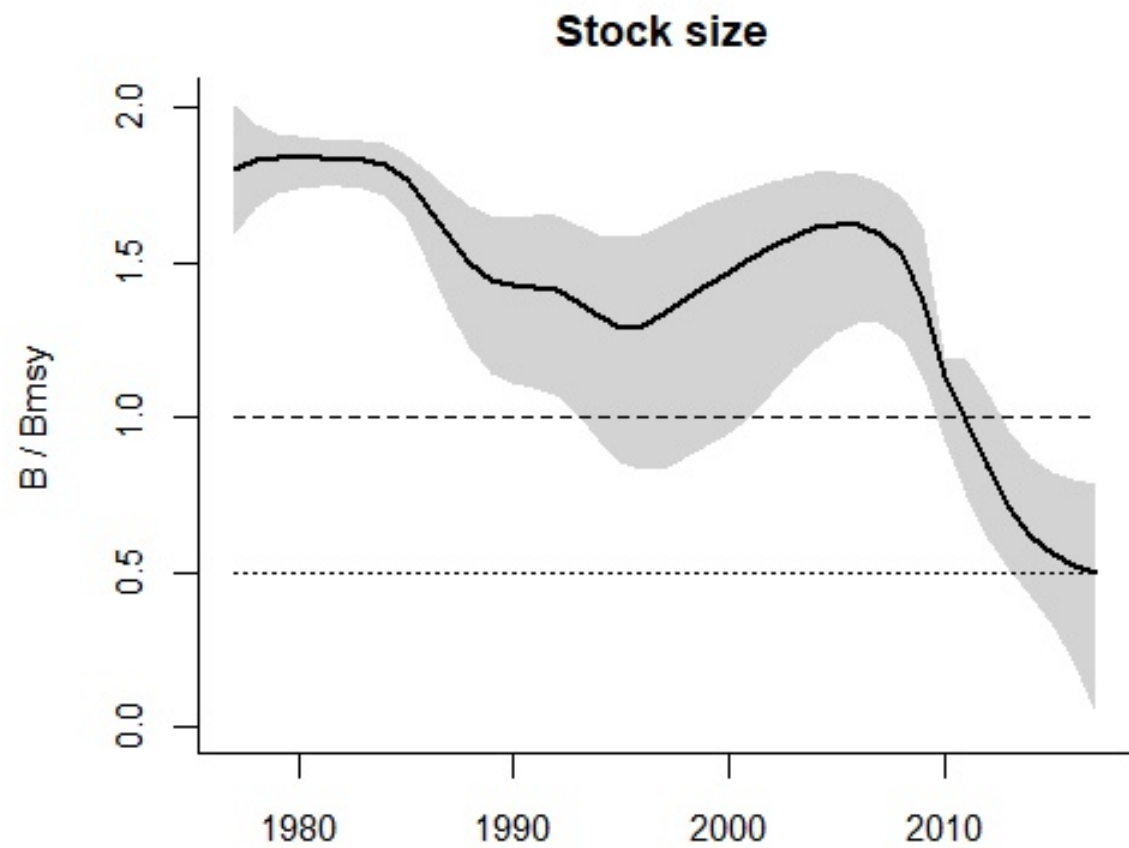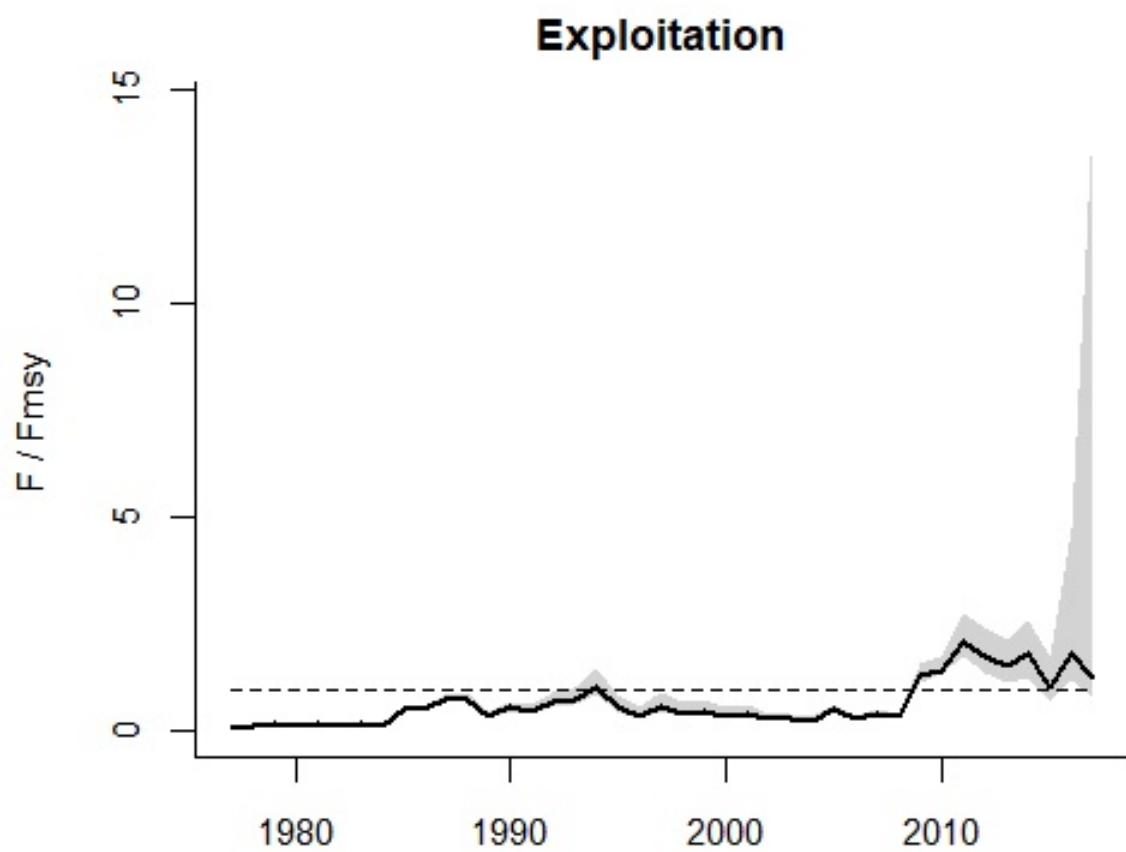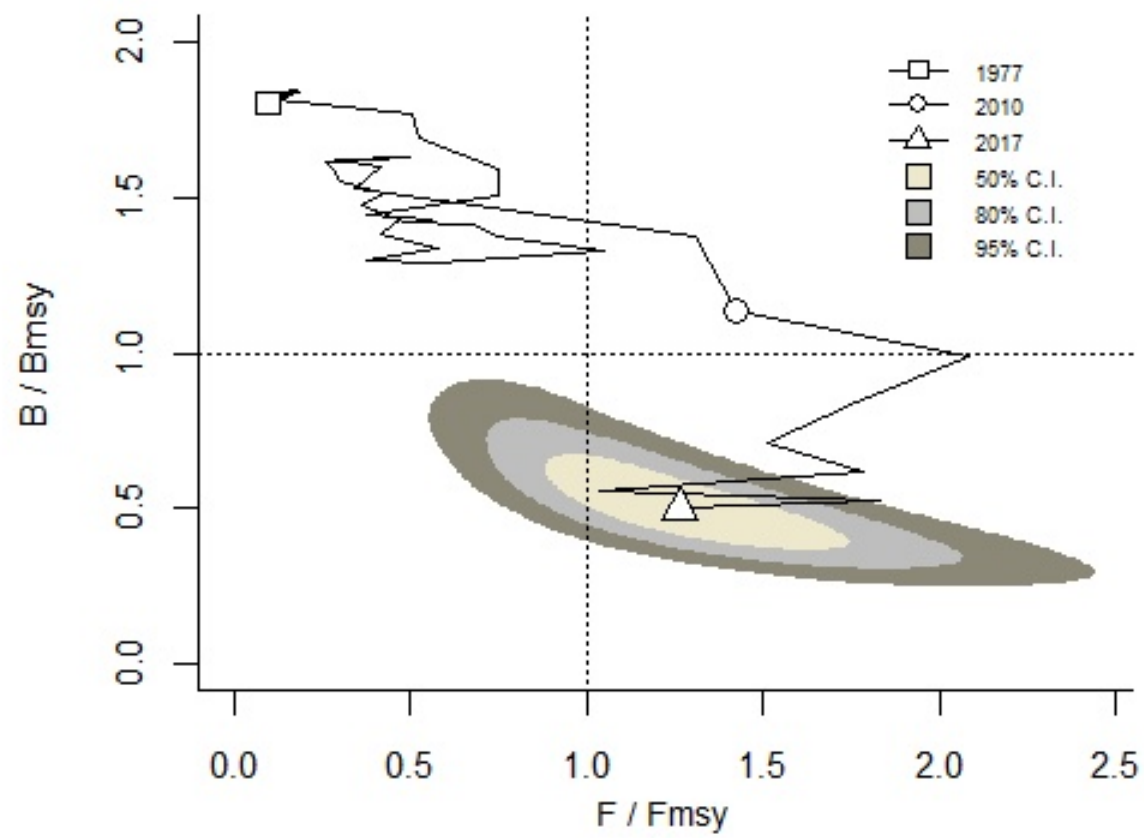

**A: Catch Bluefish\_Med**

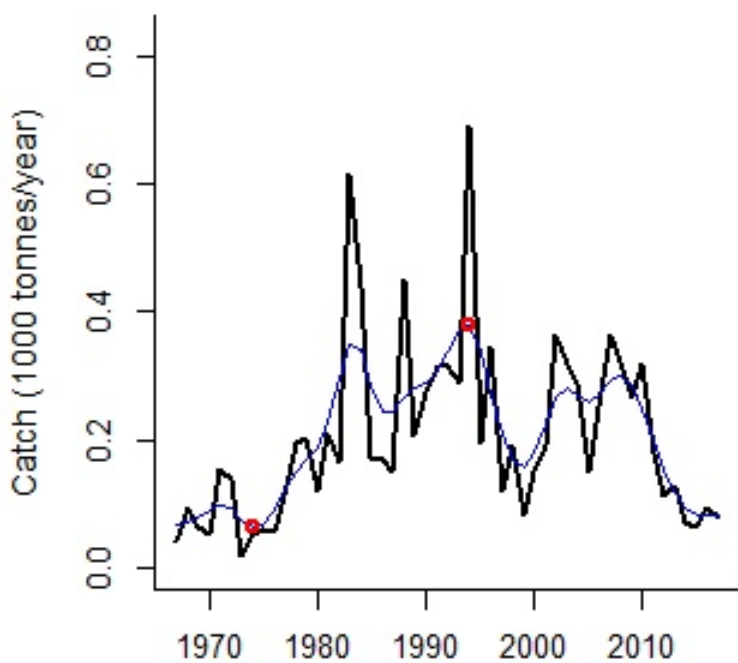

**B: Finding viable r-k**

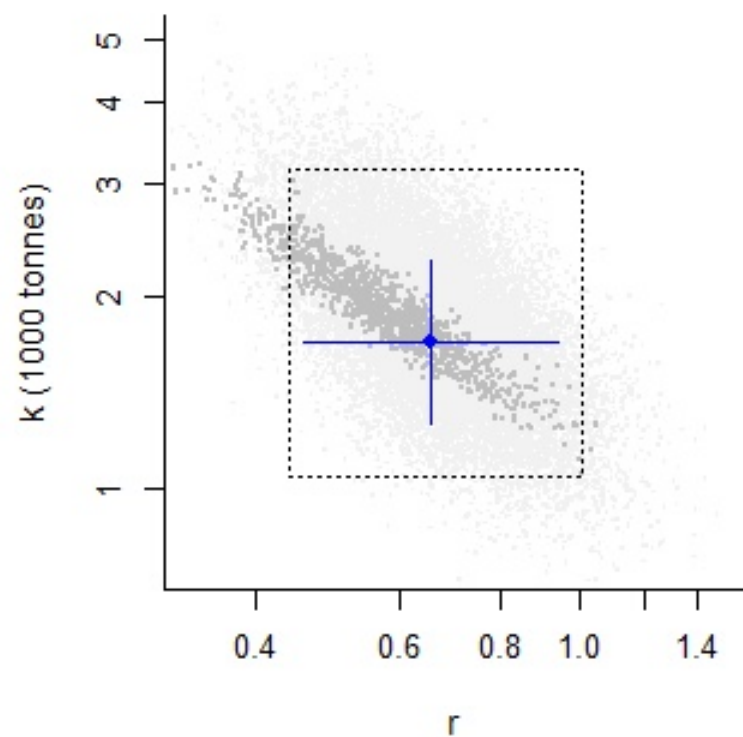

**C: Analysis of viable r-k**

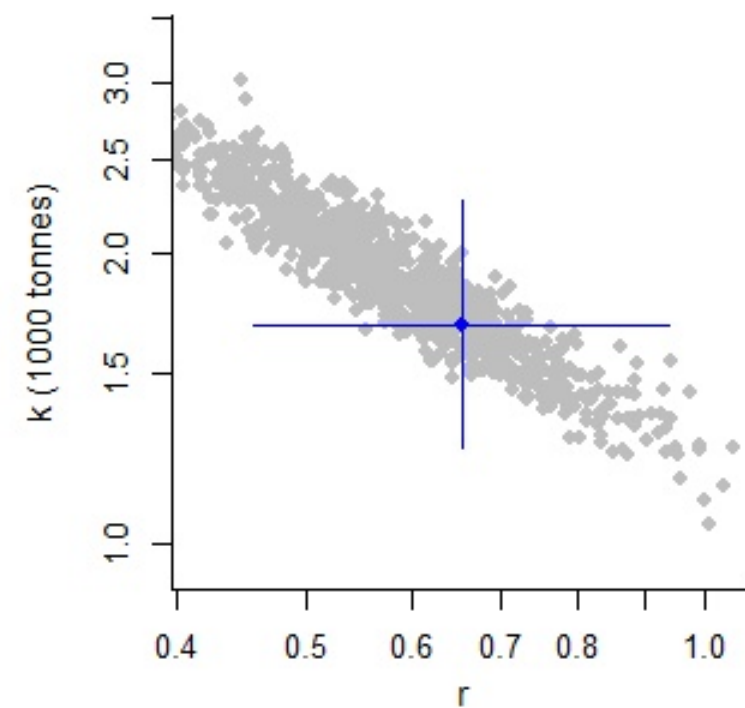

**D: Stock size**

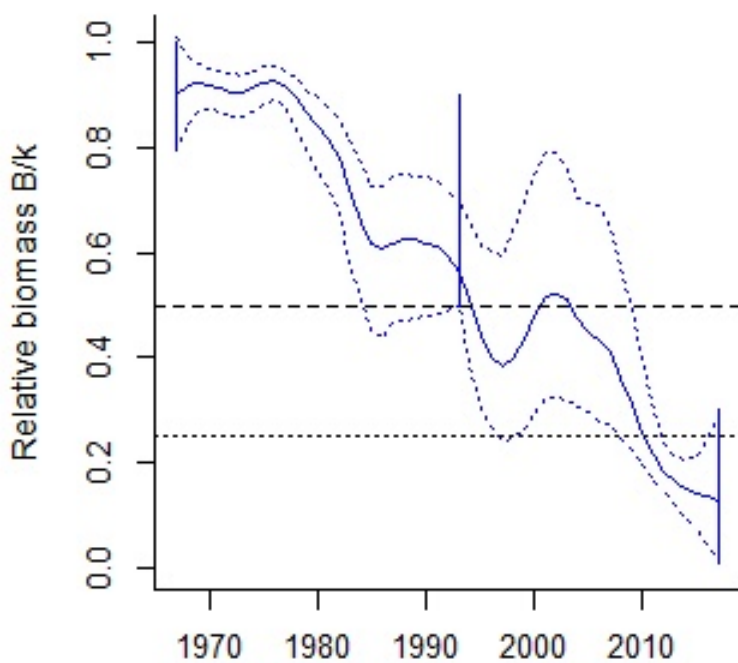

**E: Exploitation rate**

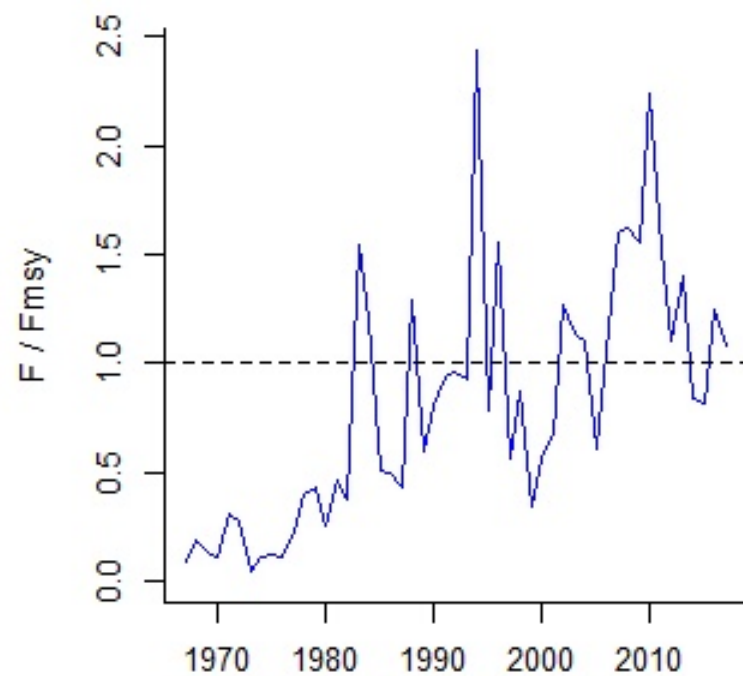

**F: Equilibrium curve**

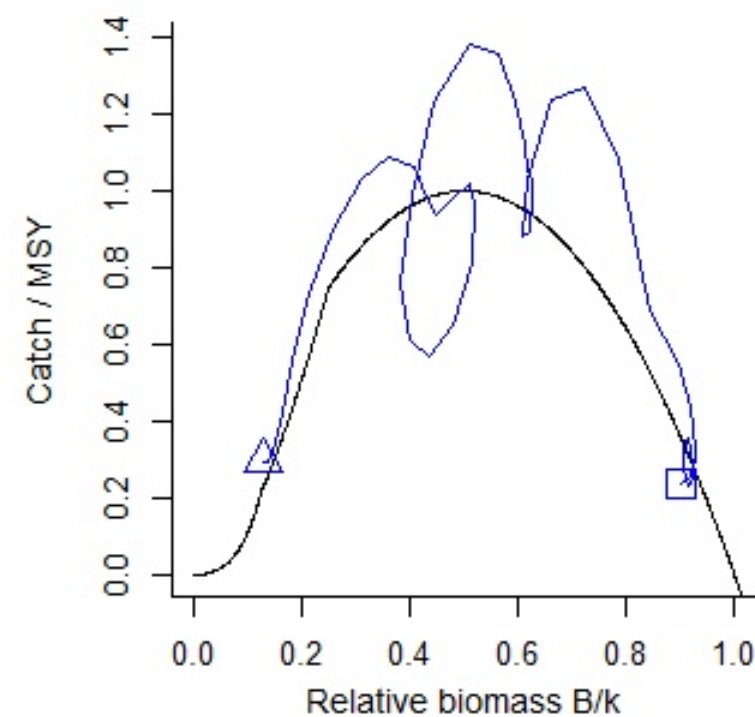



**Catch**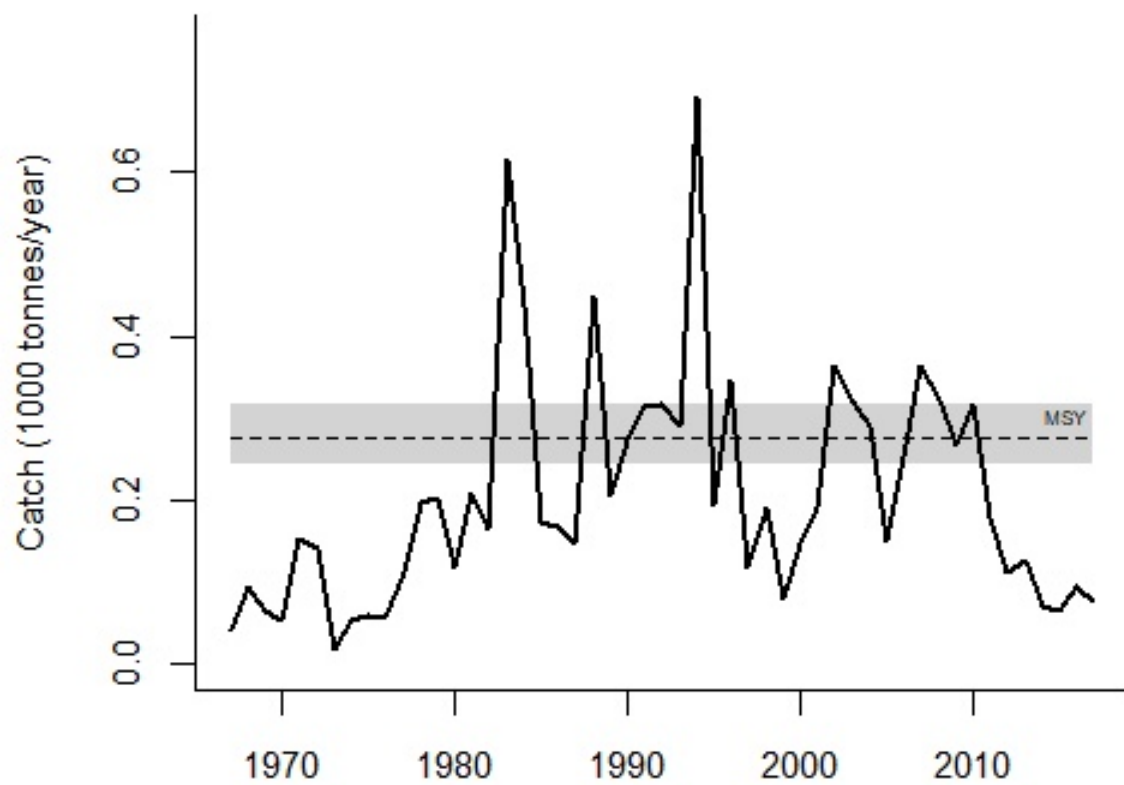**Stock size**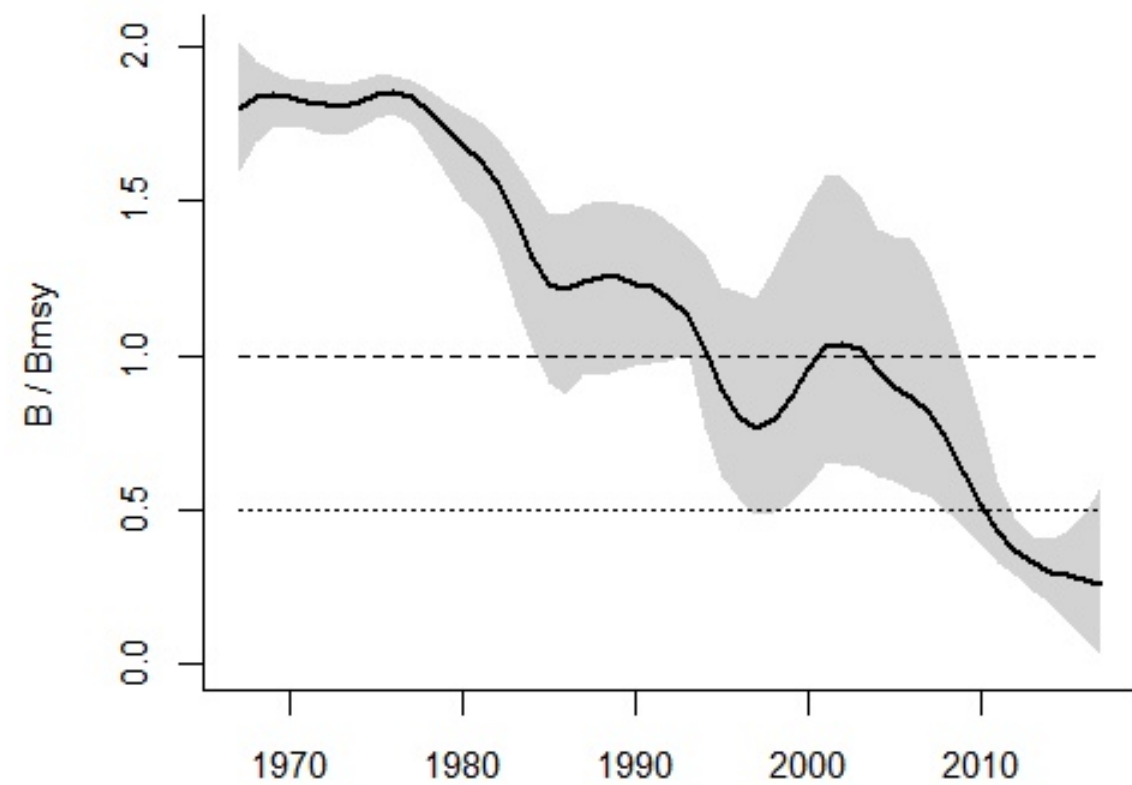**Exploitation**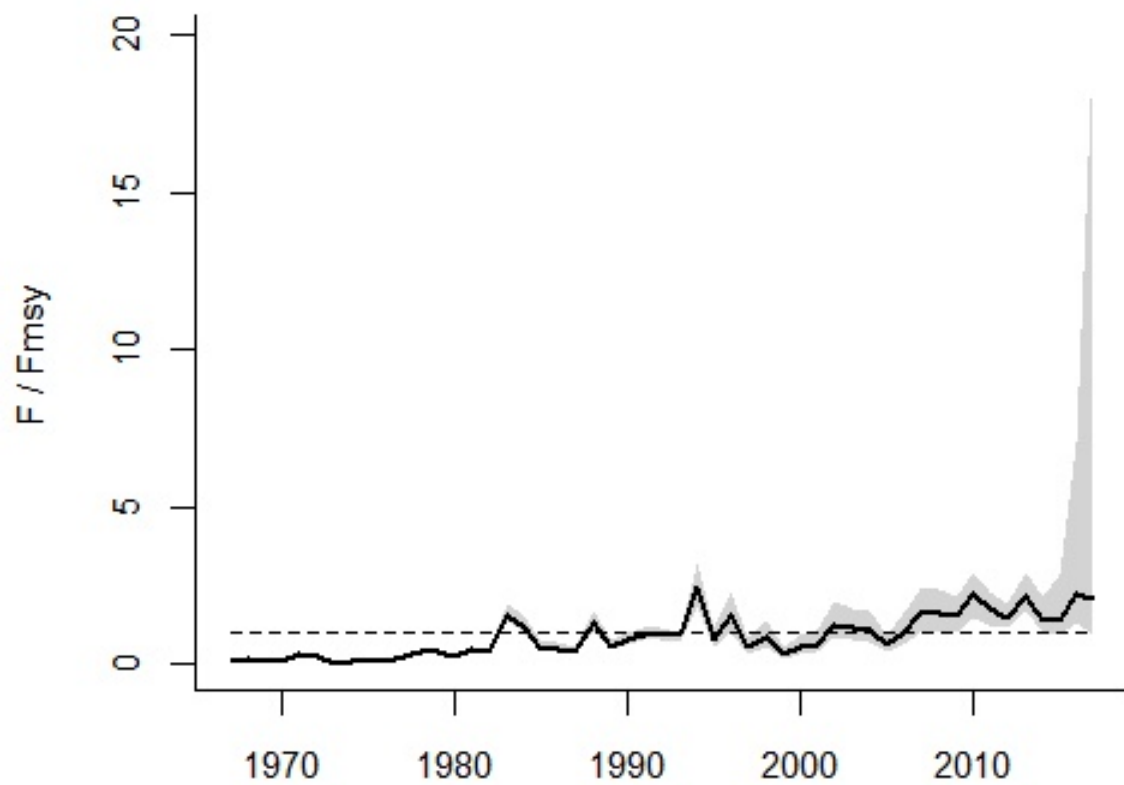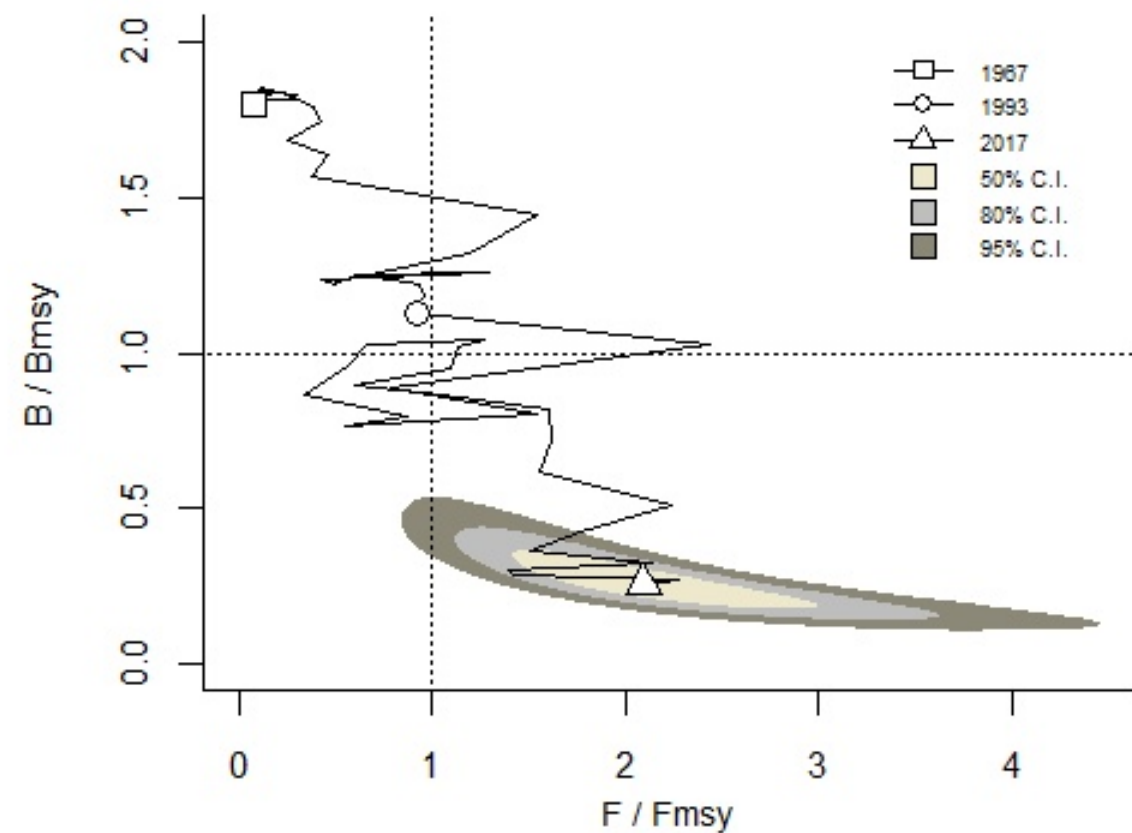

**A: Catch Whiting\_Med**

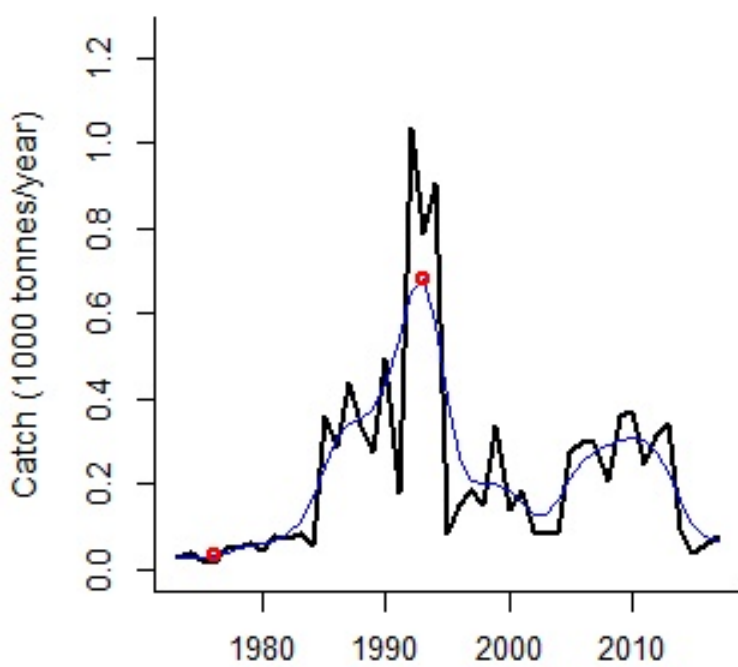

**B: Finding viable r-k**

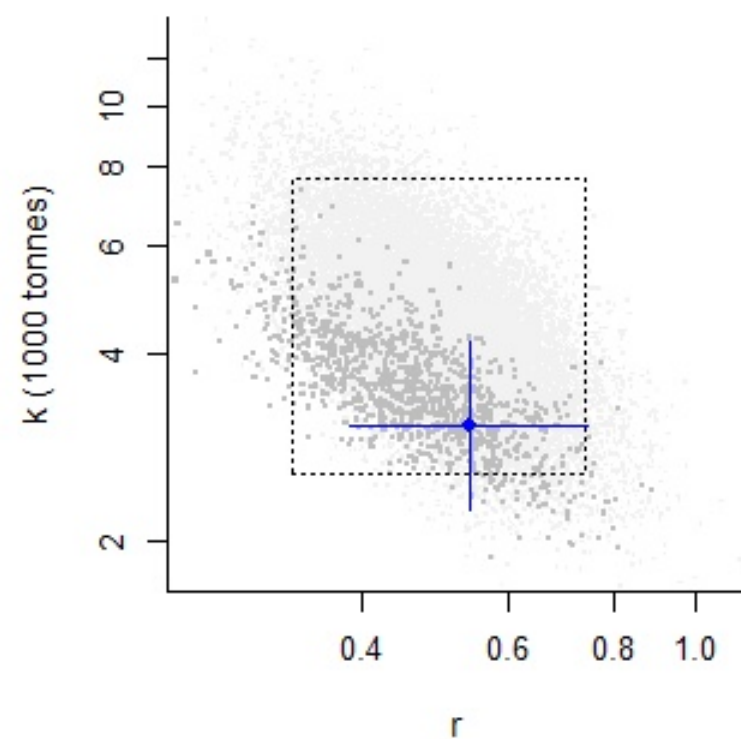

**C: Analysis of viable r-k**

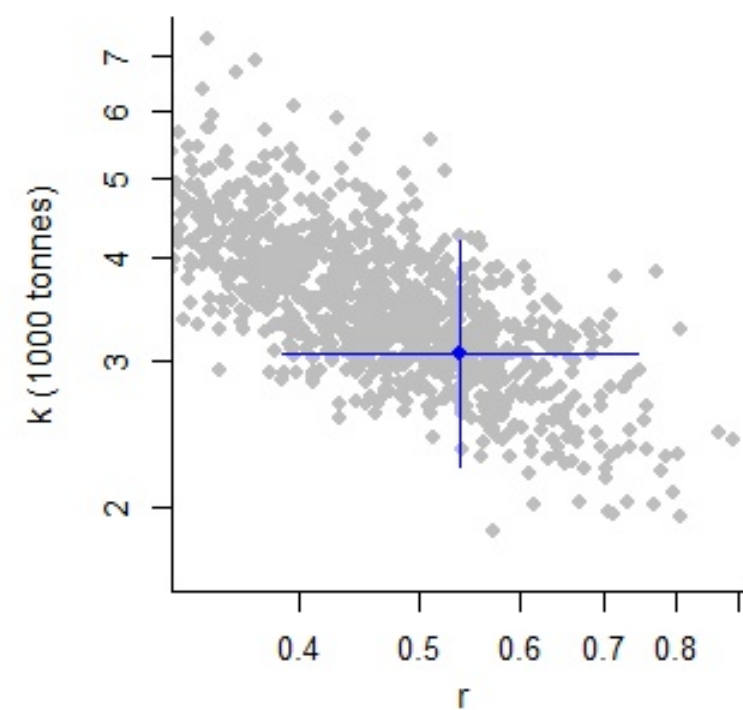

**D: Stock size**

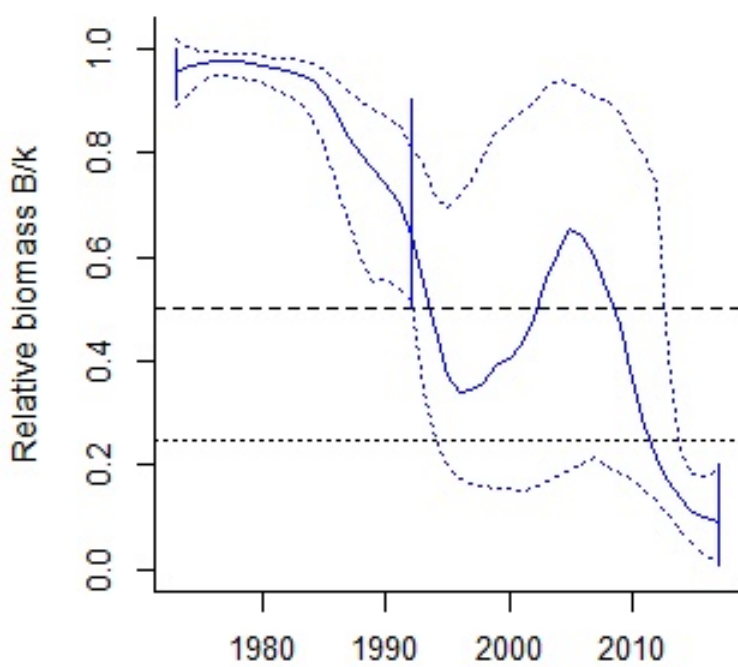

**E: Exploitation rate**

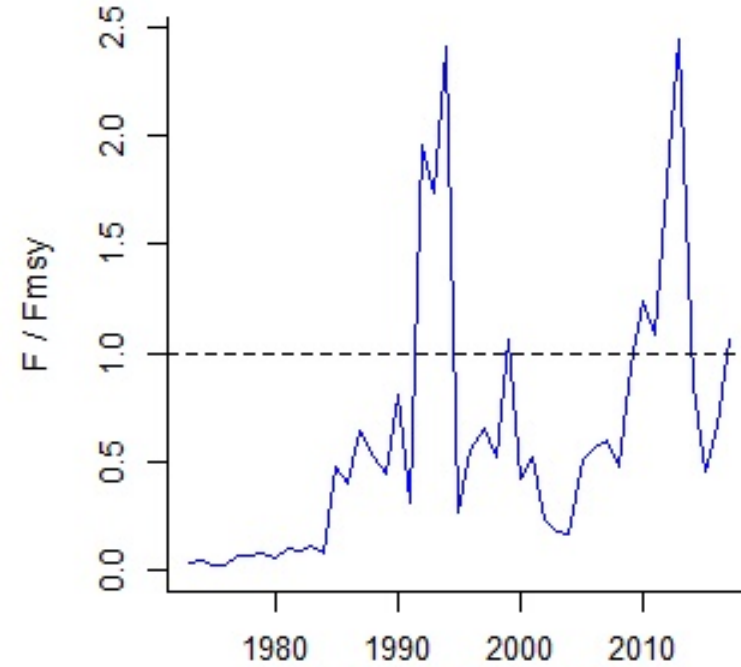

**F: Equilibrium curve**

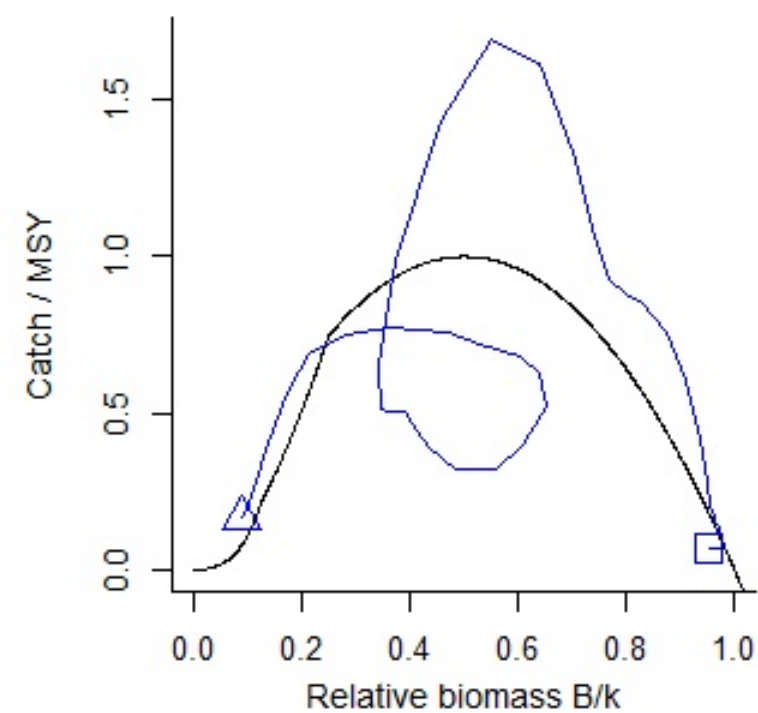

**Catch**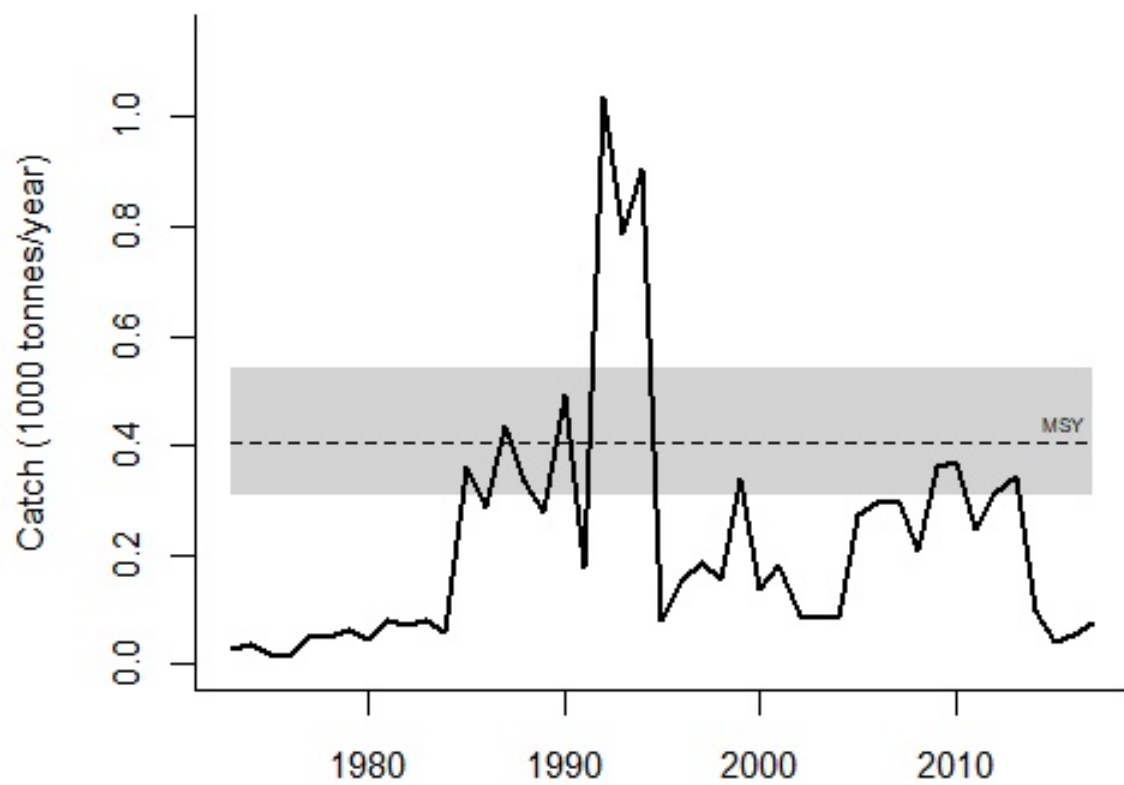**Stock size**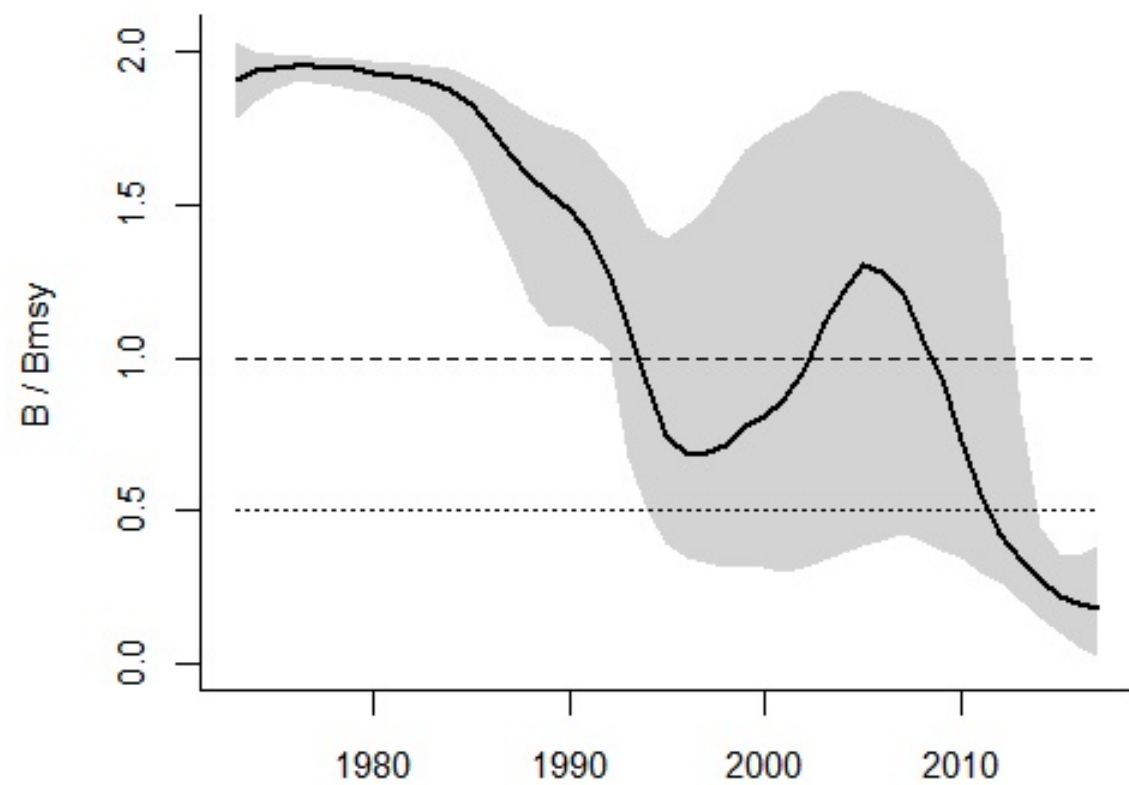**Exploitation**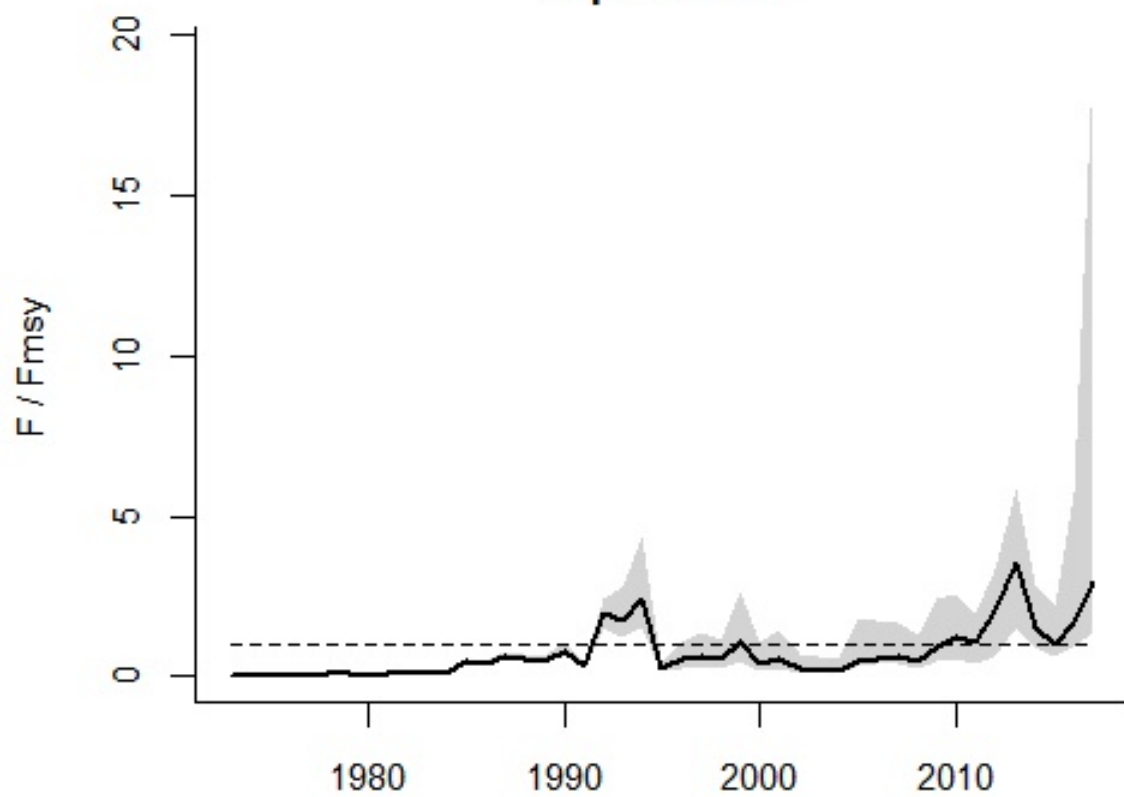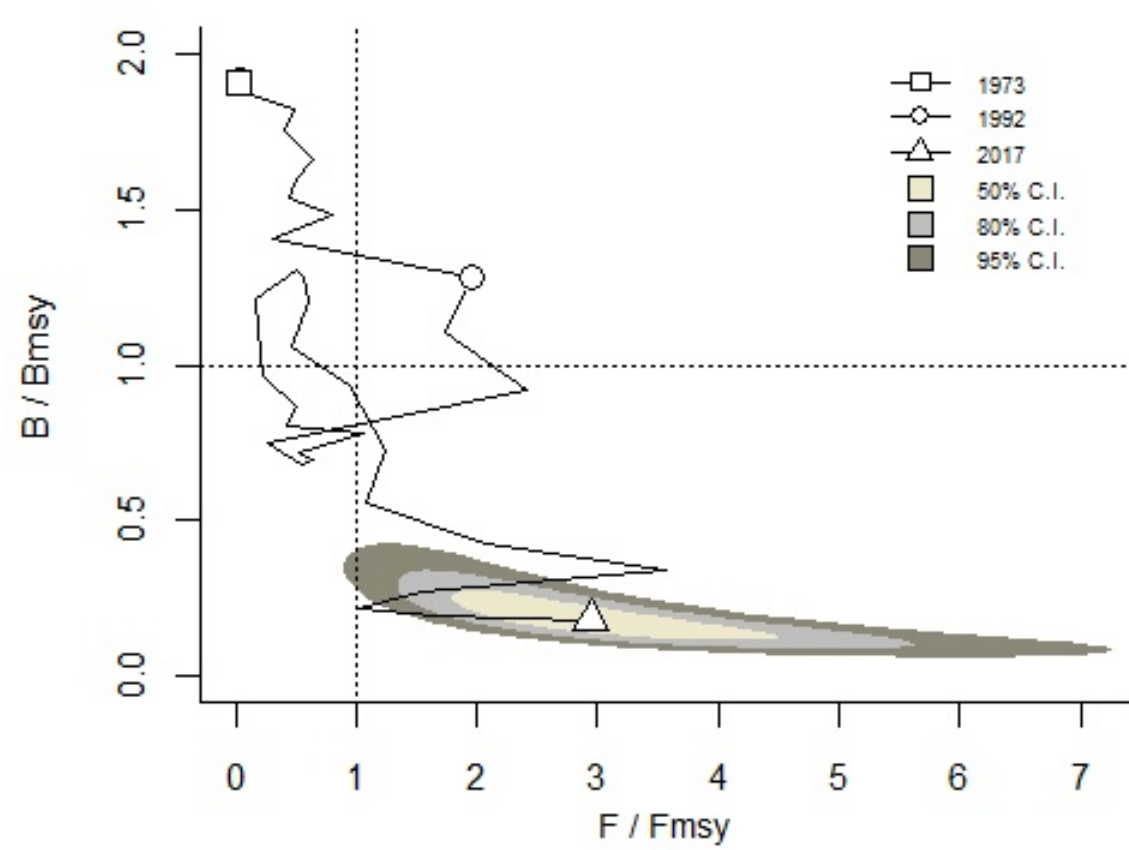

**A: Catch Seabass\_Med**

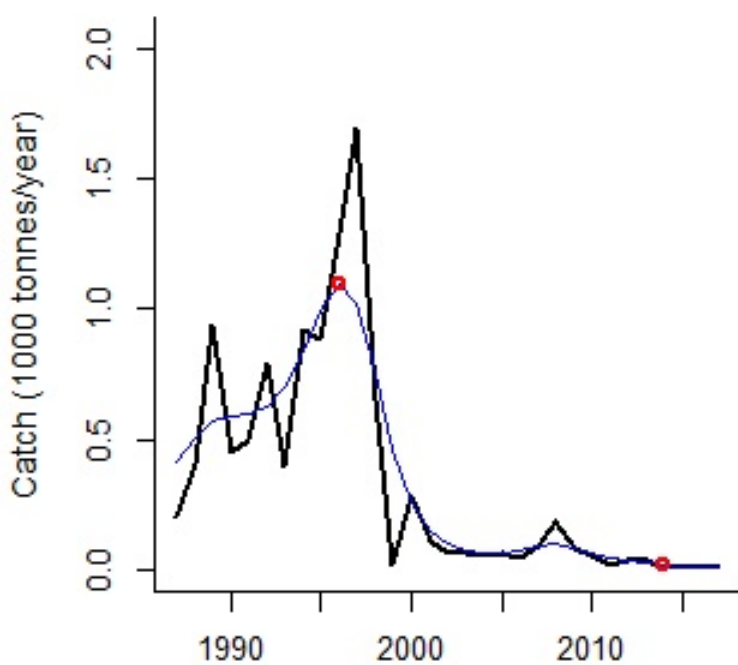

**B: Finding viable r-k**

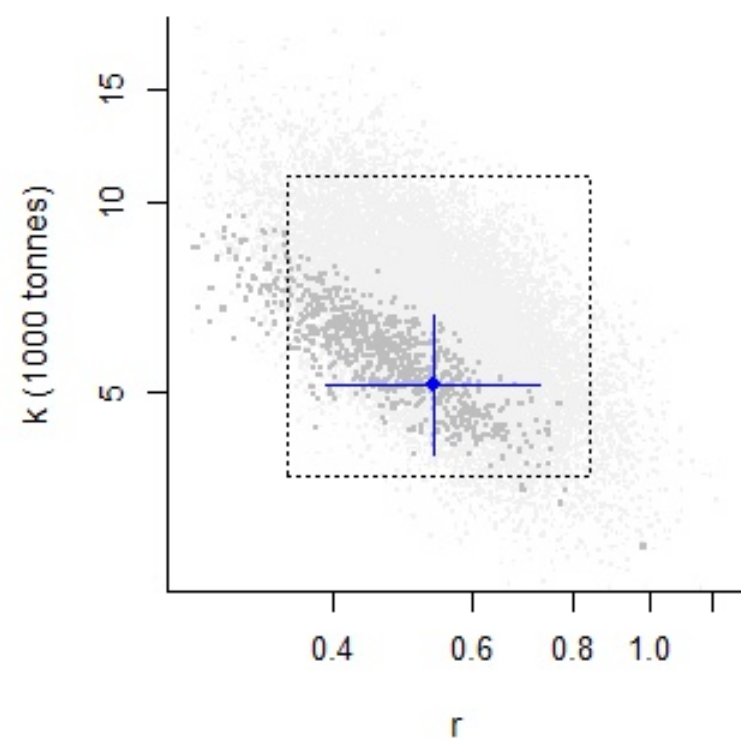

**C: Analysis of viable r-k**

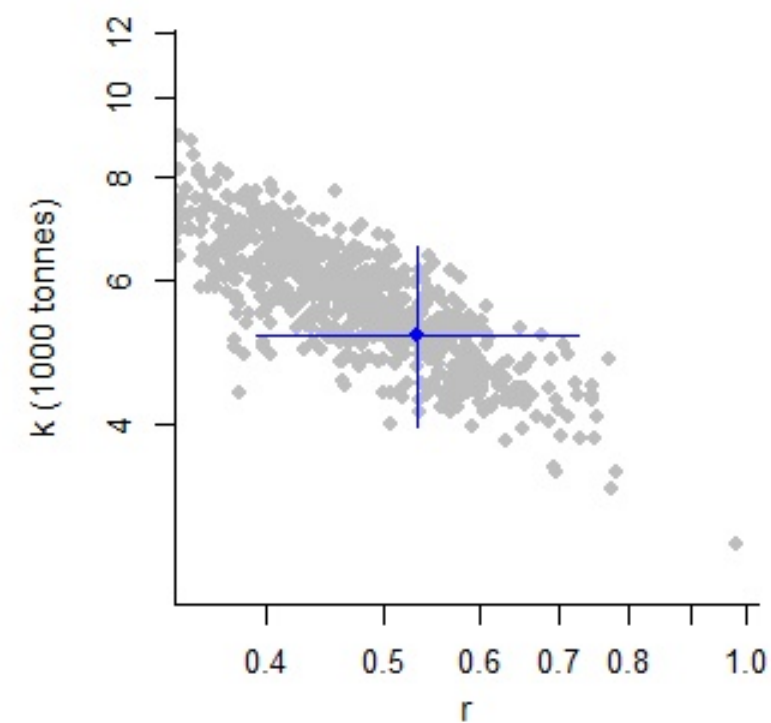

**D: Stock size**

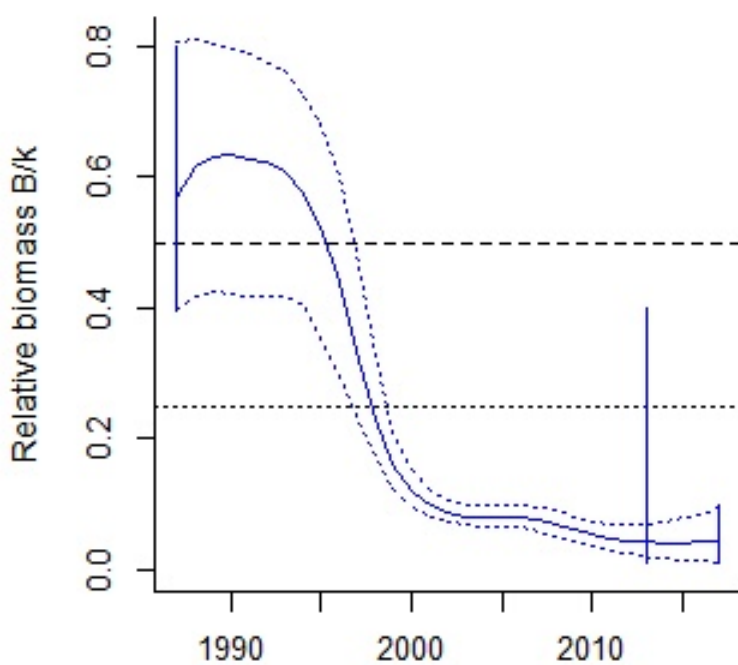

**E: Exploitation rate**

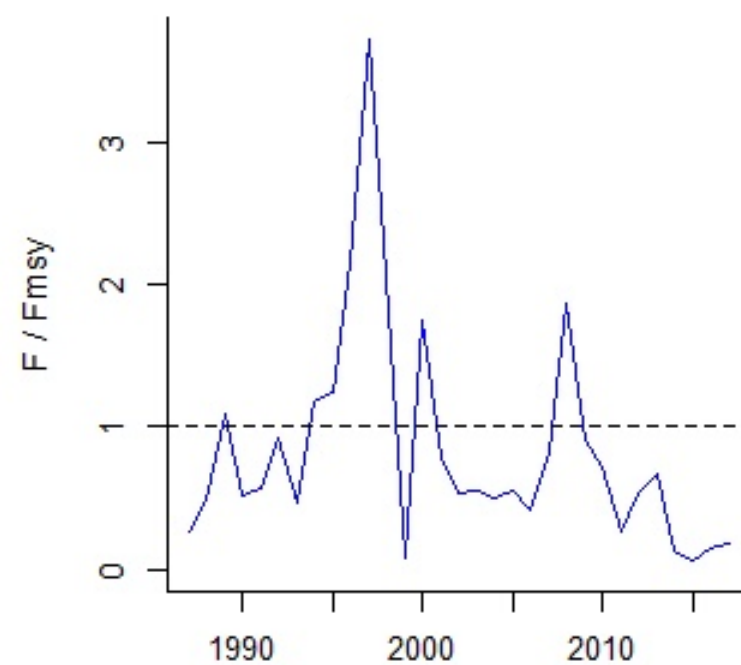

**F: Equilibrium curve**

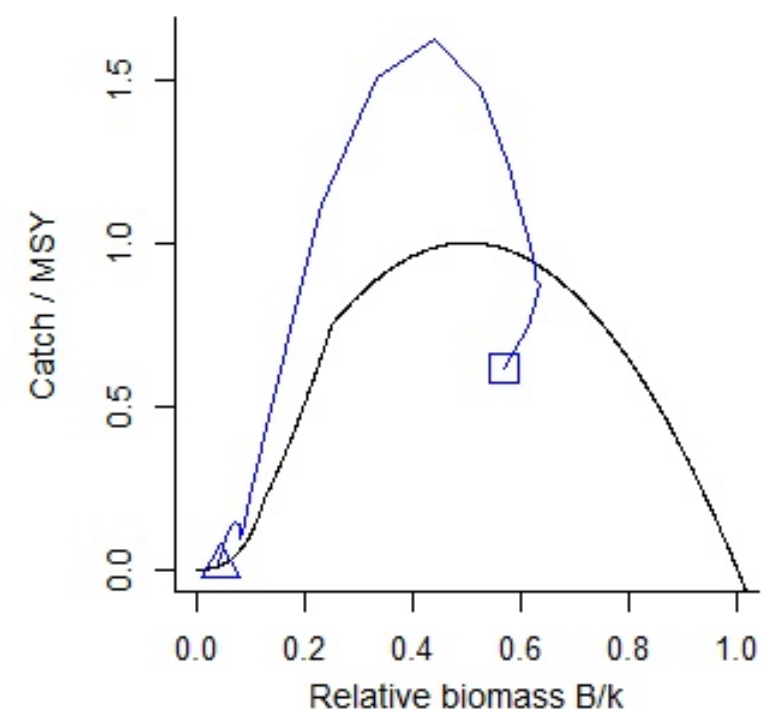



**Catch**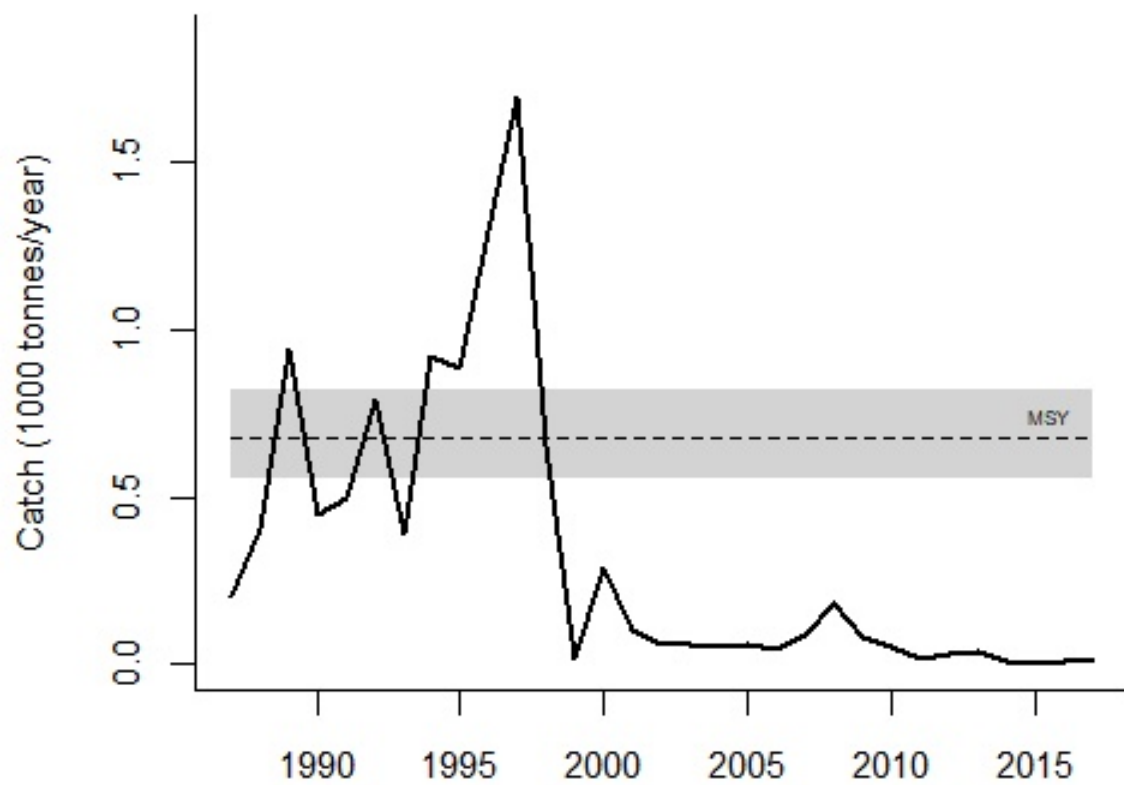**Stock size**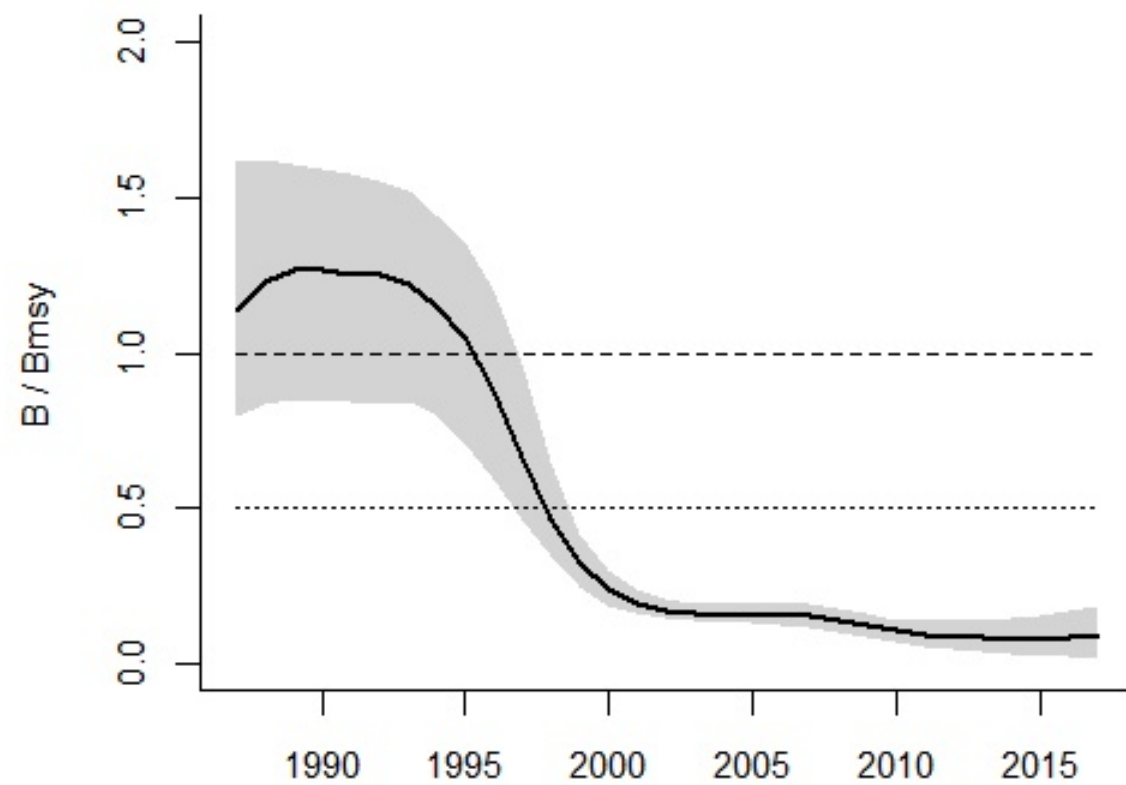**Exploitation**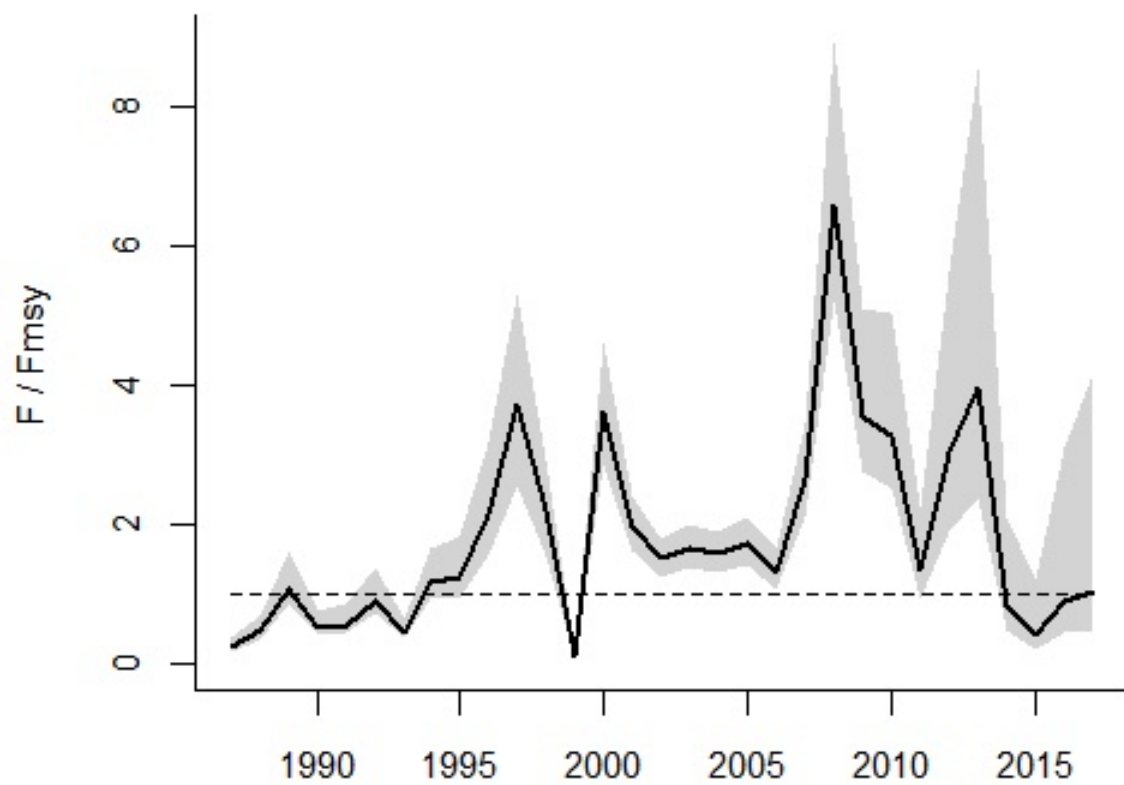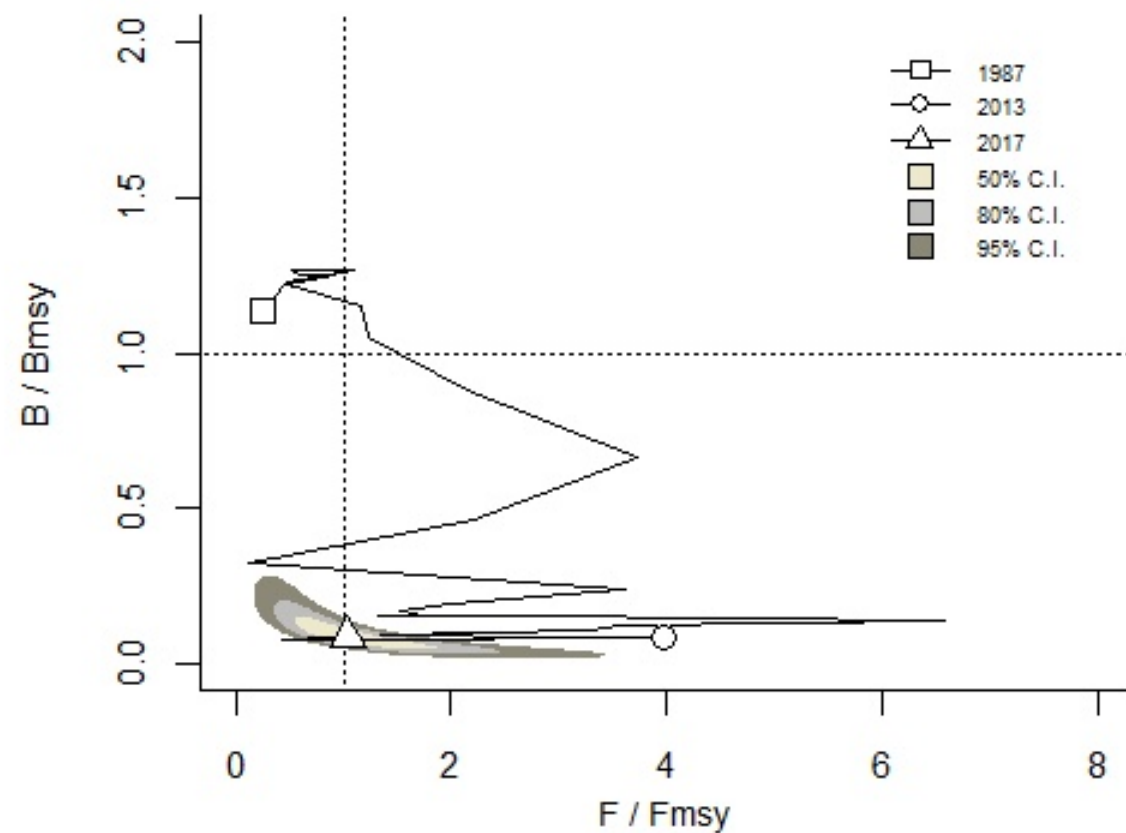

**A: Catch Grouper\_Med**

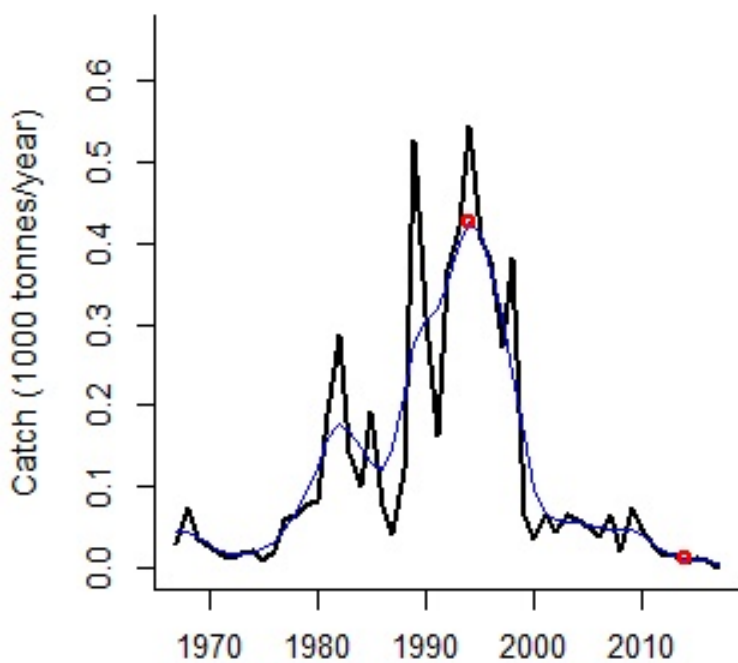

**B: Finding viable r-k**

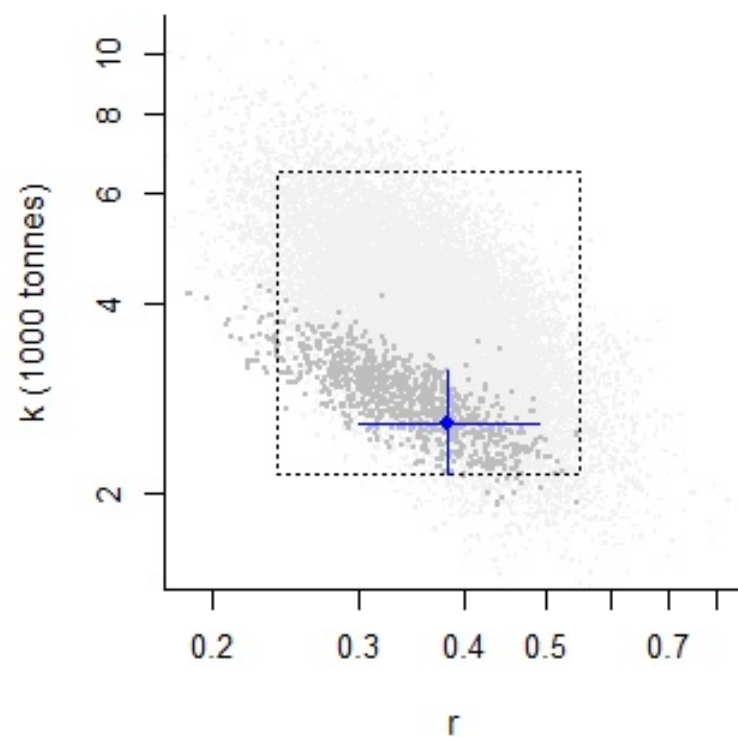

**C: Analysis of viable r-k**

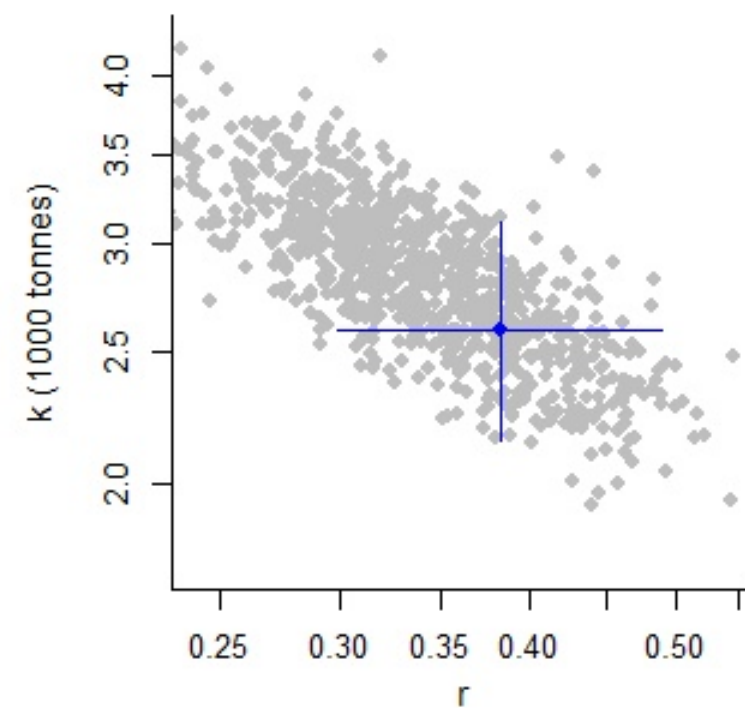

**D: Stock size**

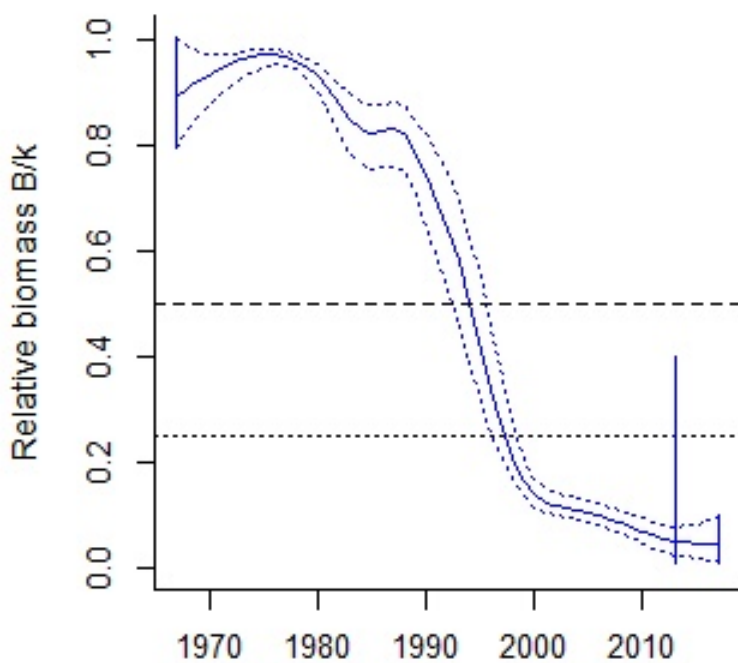

**E: Exploitation rate**

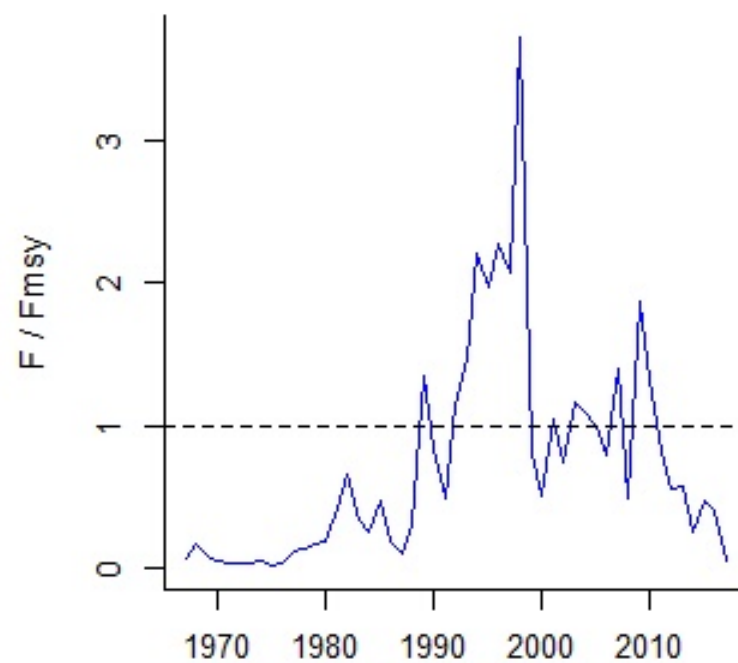

**F: Equilibrium curve**

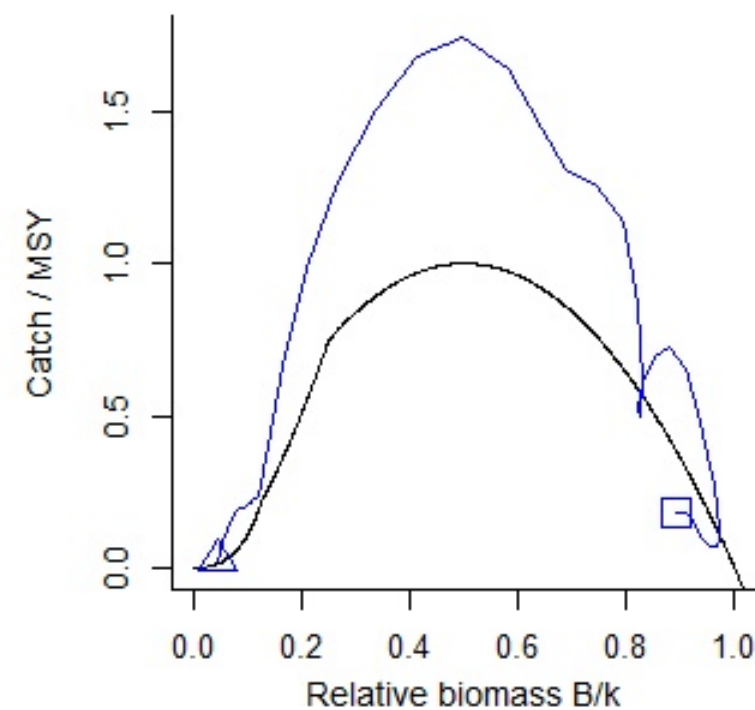

**Catch**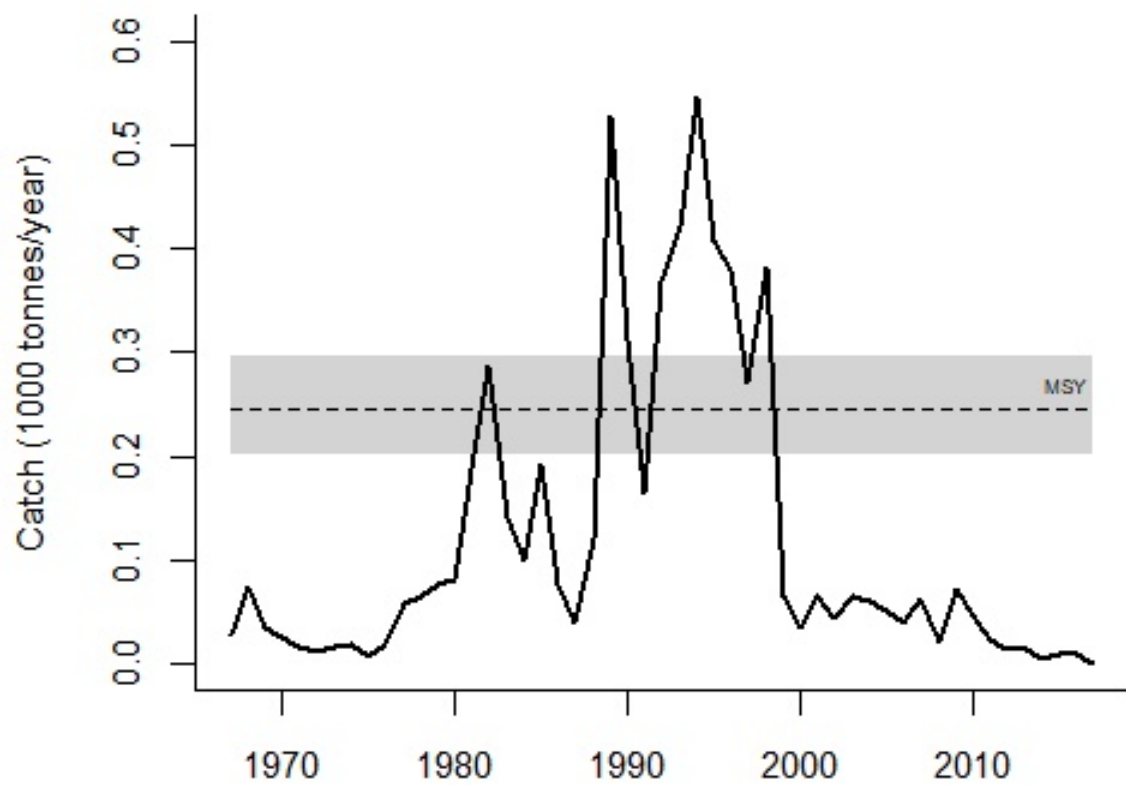**Stock size**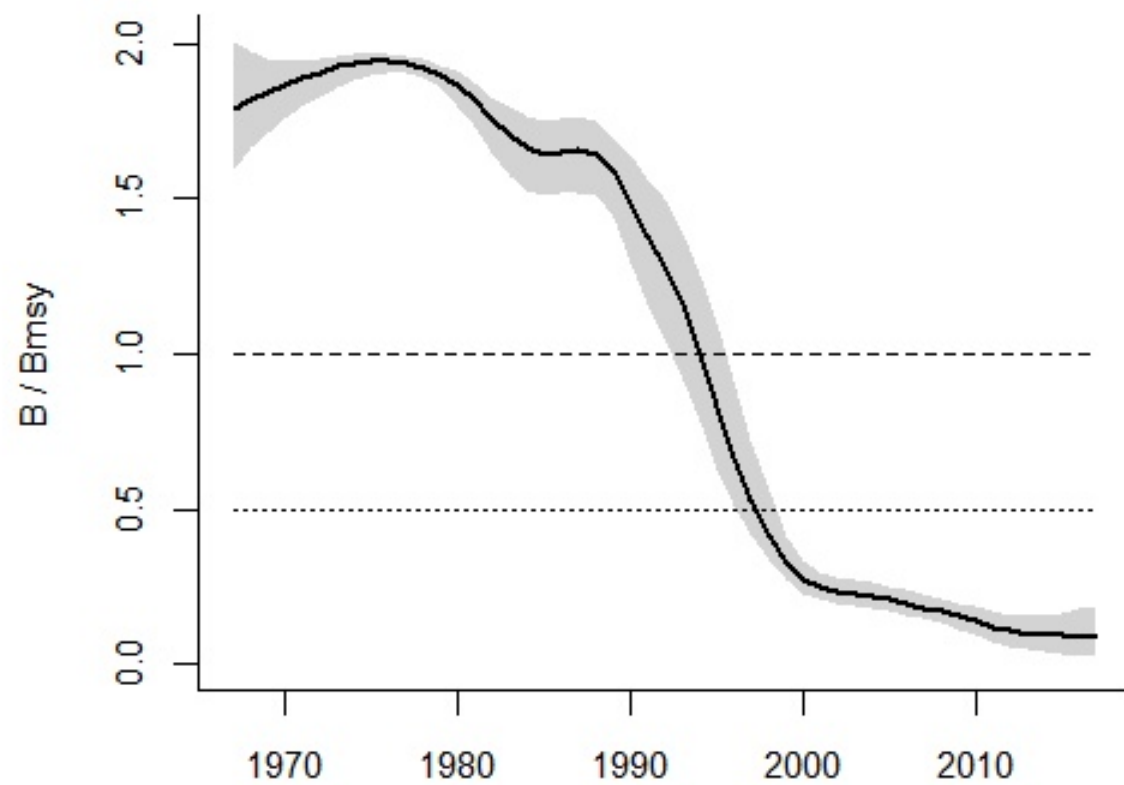**Exploitation**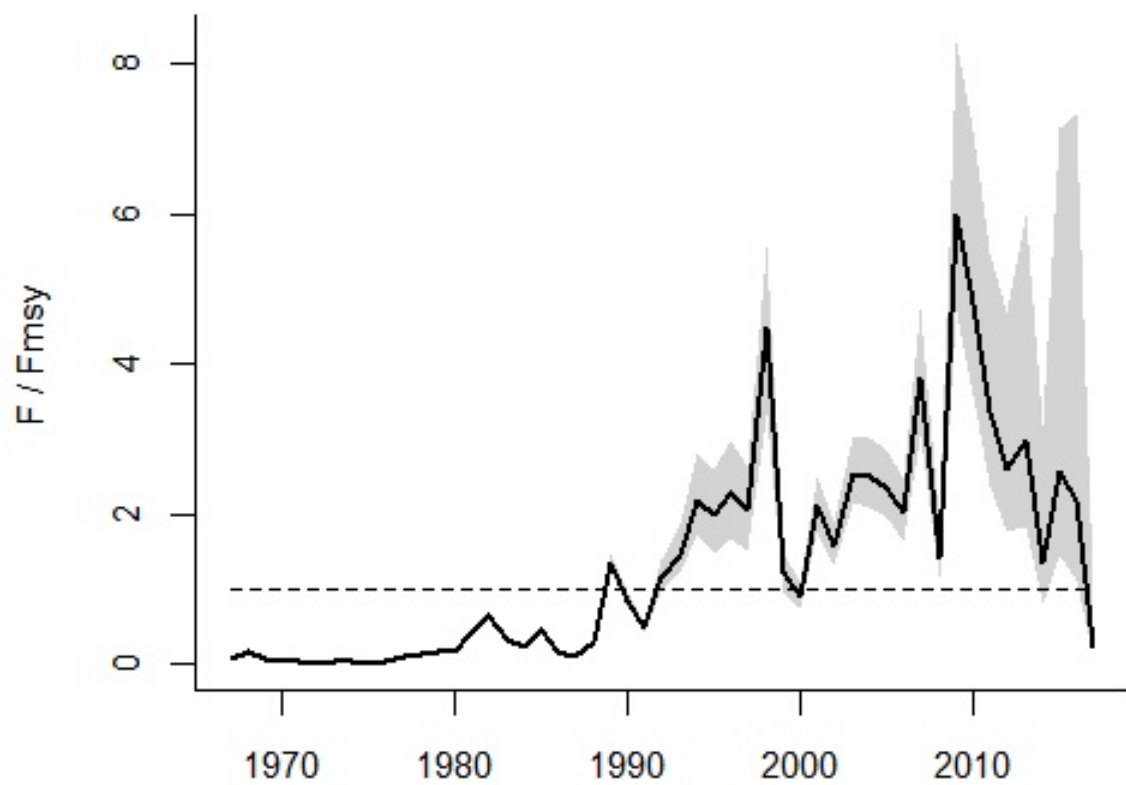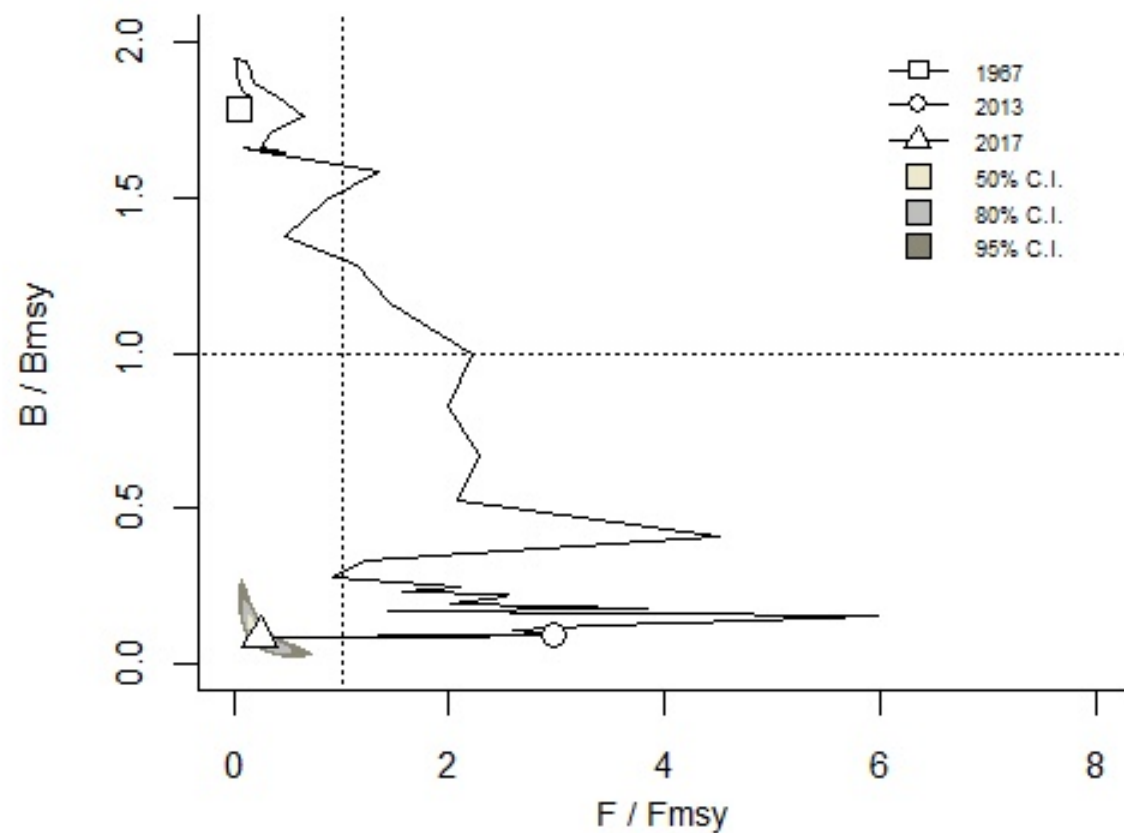

**A: Catch Leerfish\_Med**

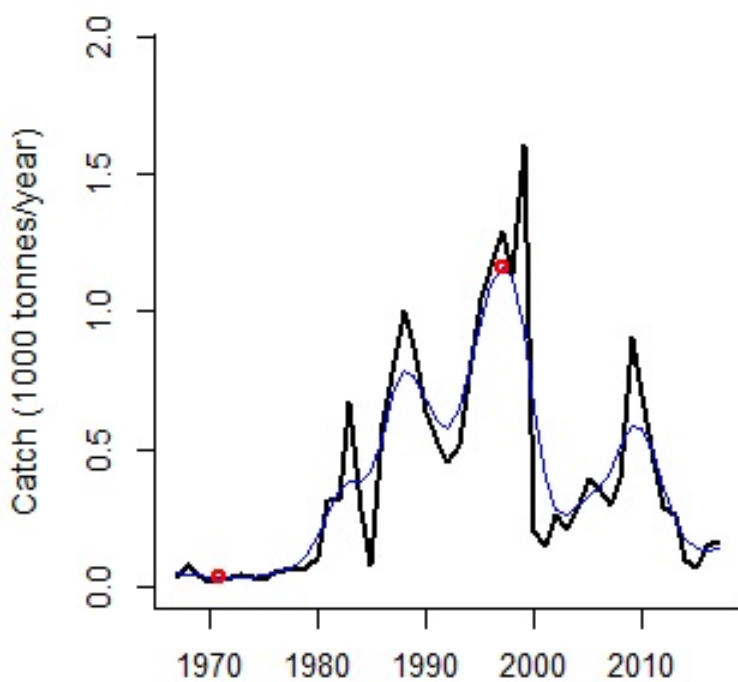

**B: Finding viable r-k**

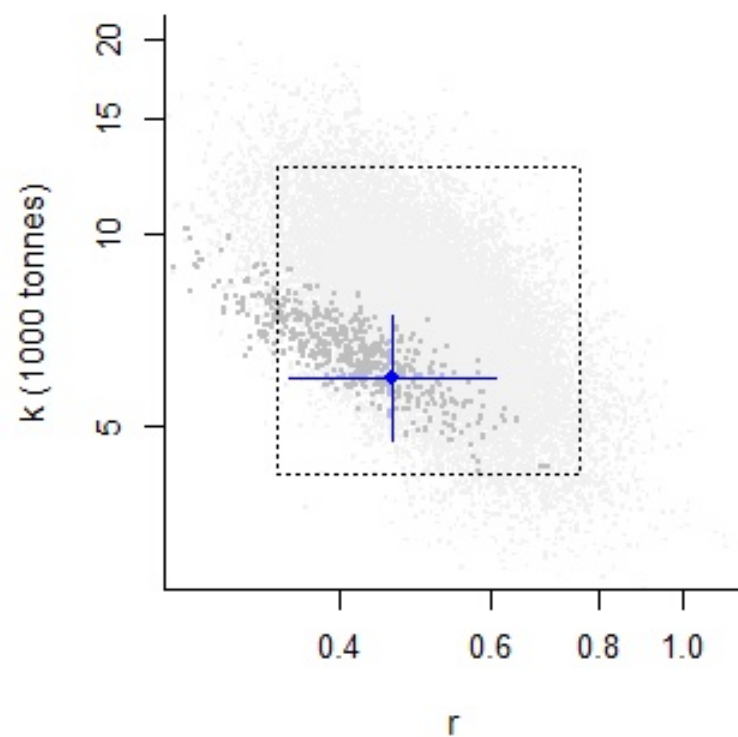

**C: Analysis of viable r-k**

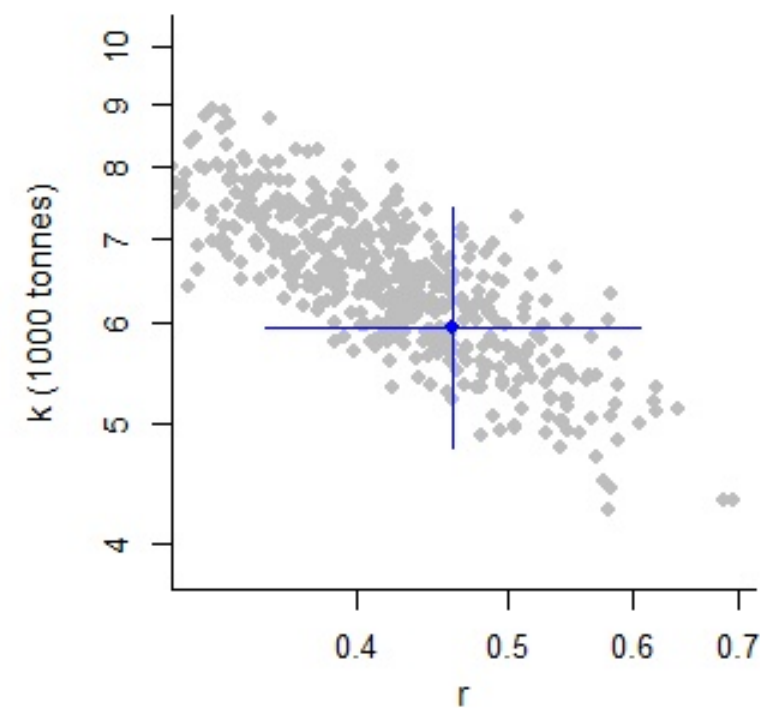

**D: Stock size**

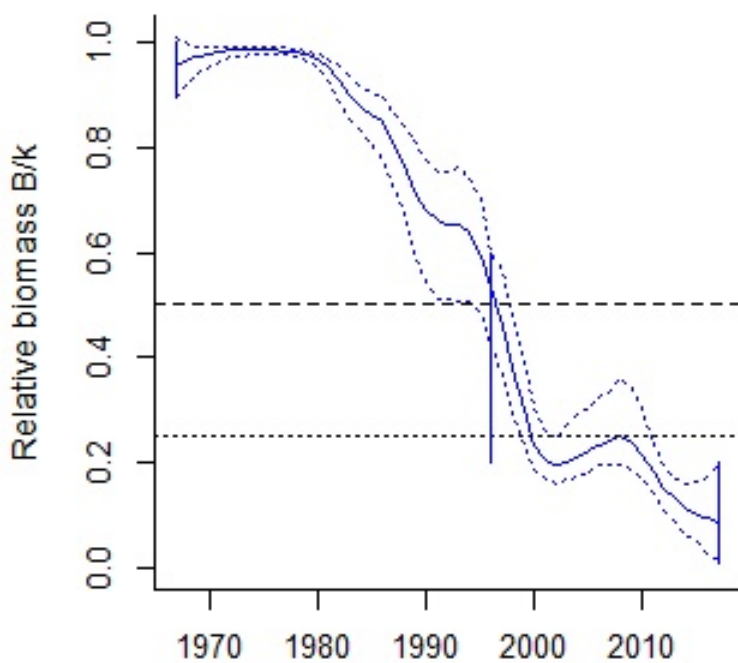

**E: Exploitation rate**

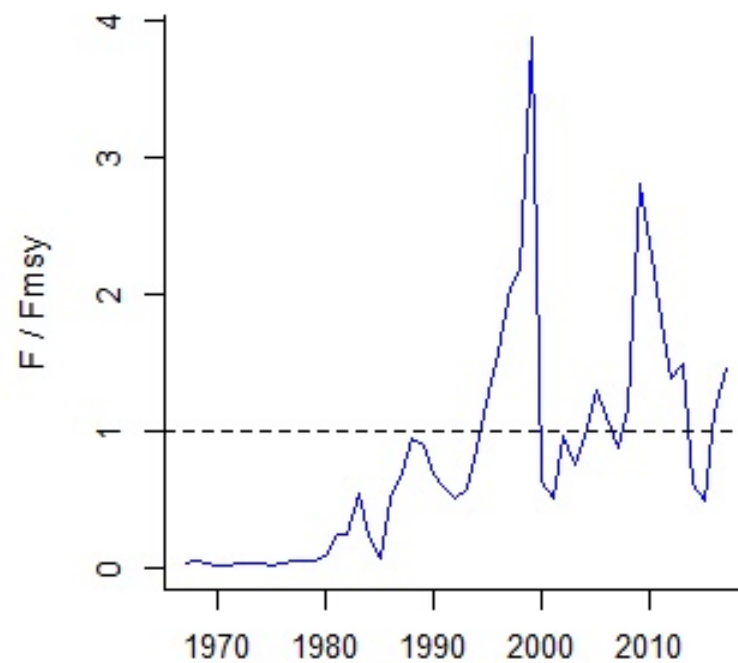

**F: Equilibrium curve**

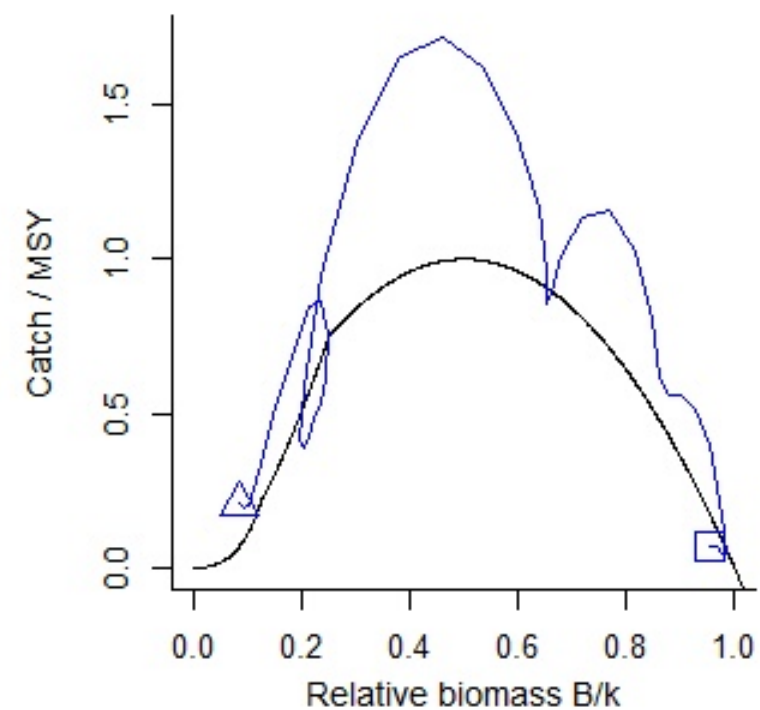



**Catch**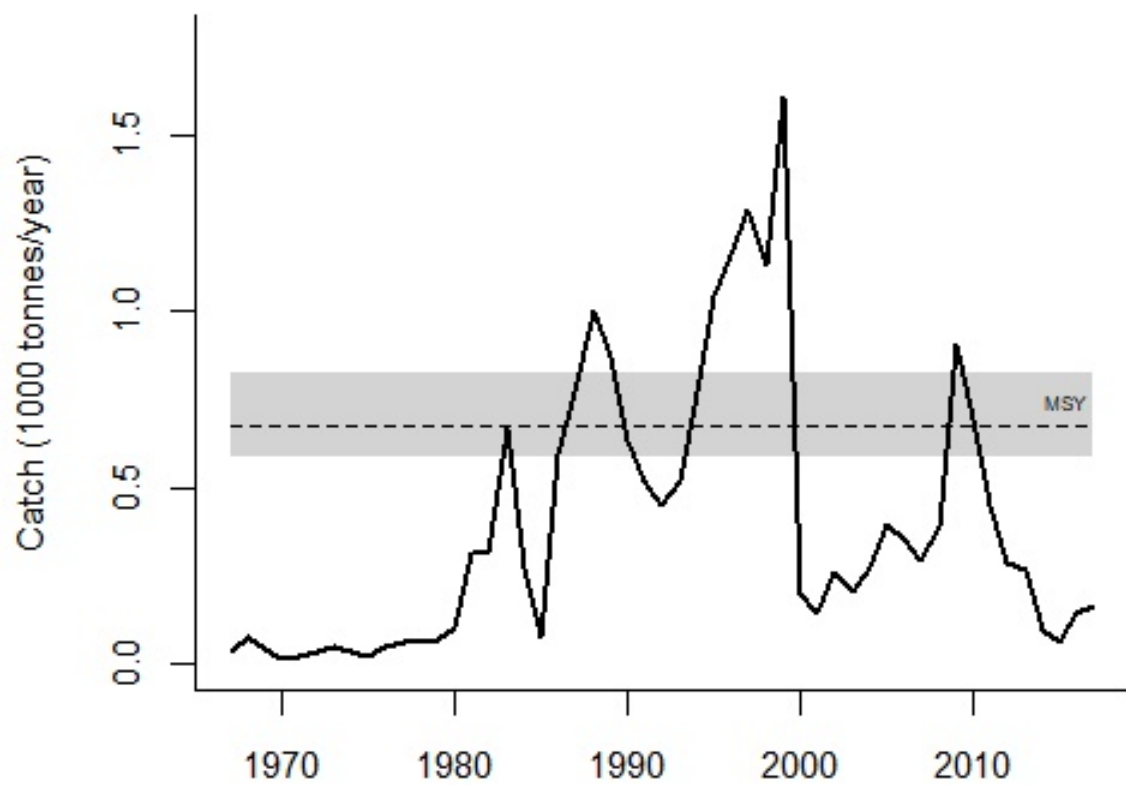**Stock size**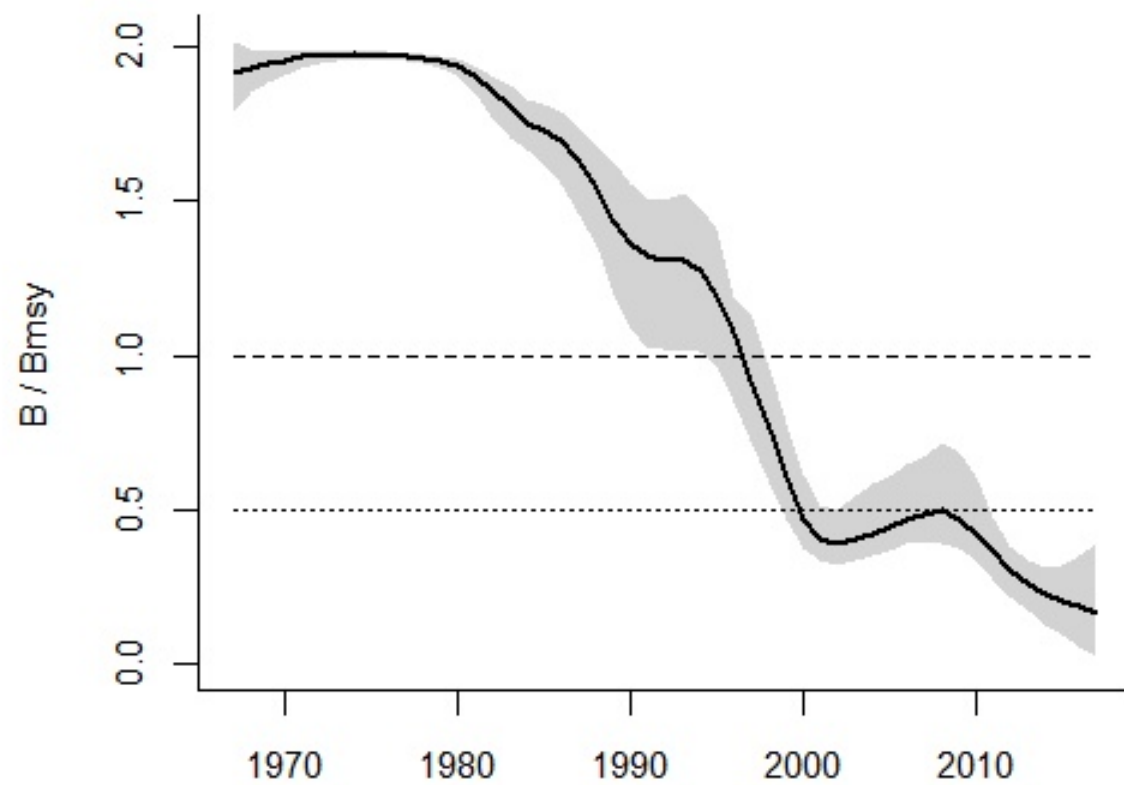**Exploitation**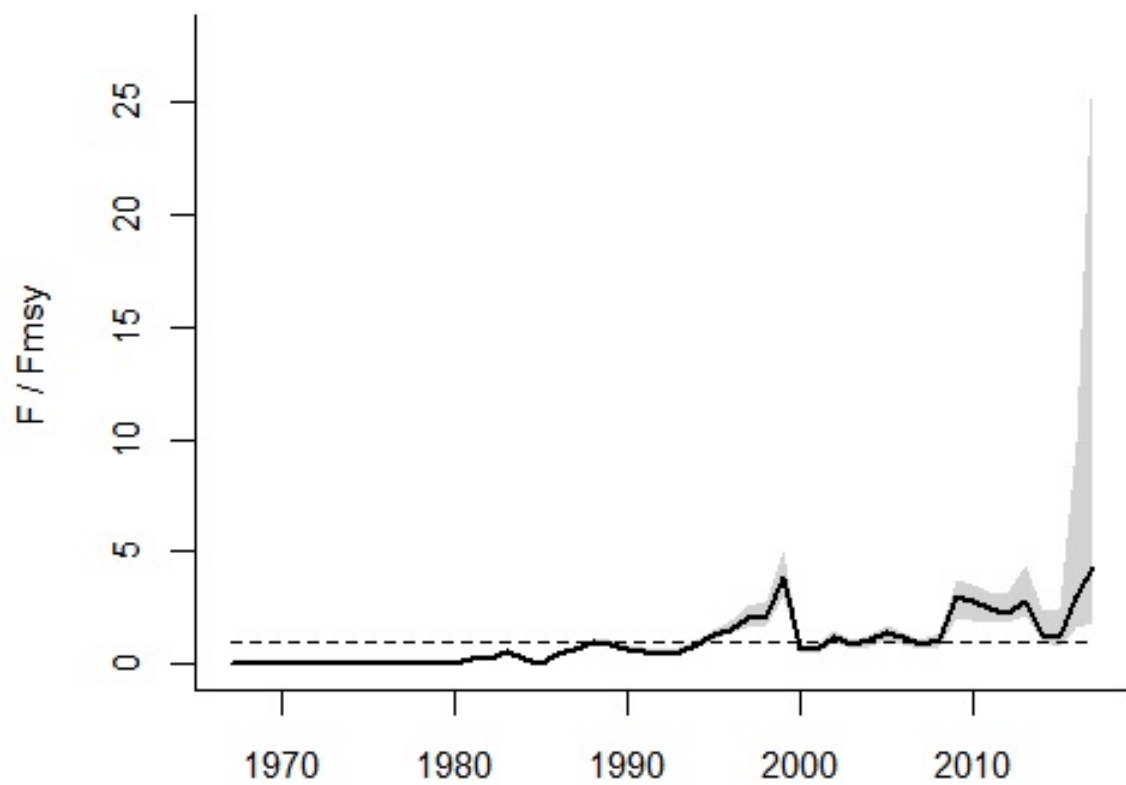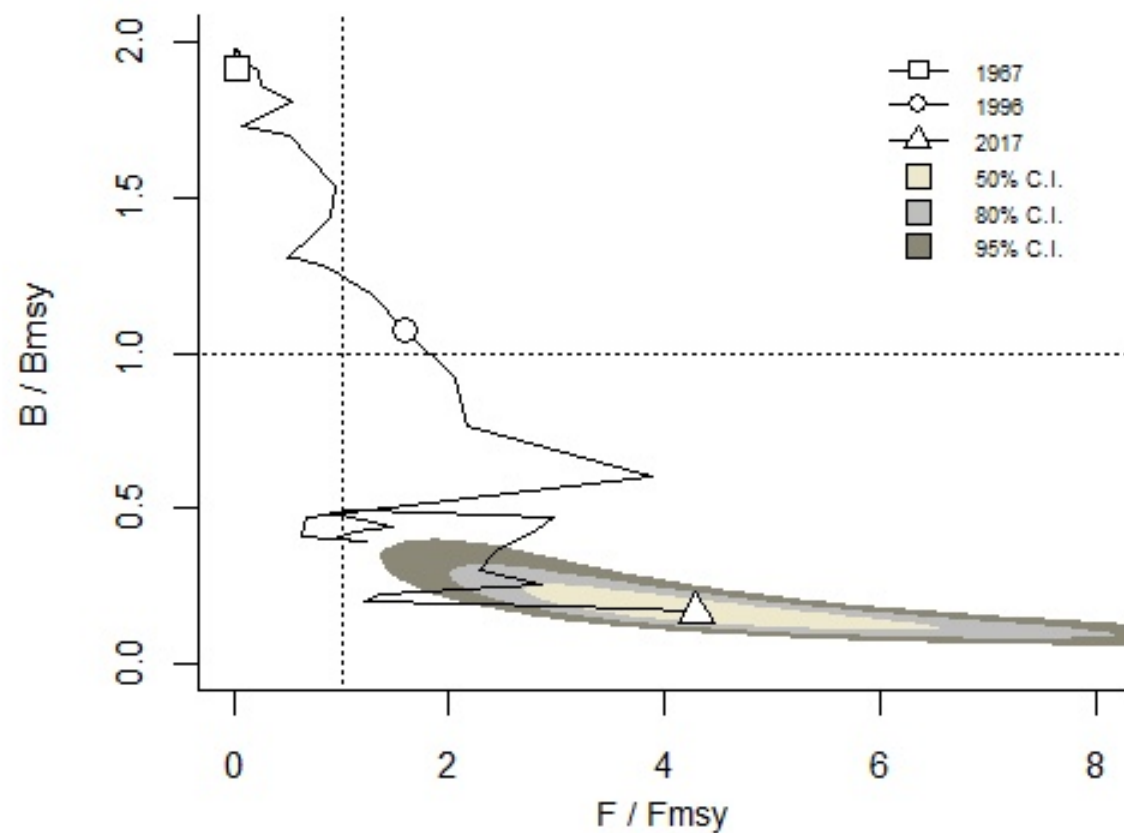

**A: Catch Mullet\_Med**

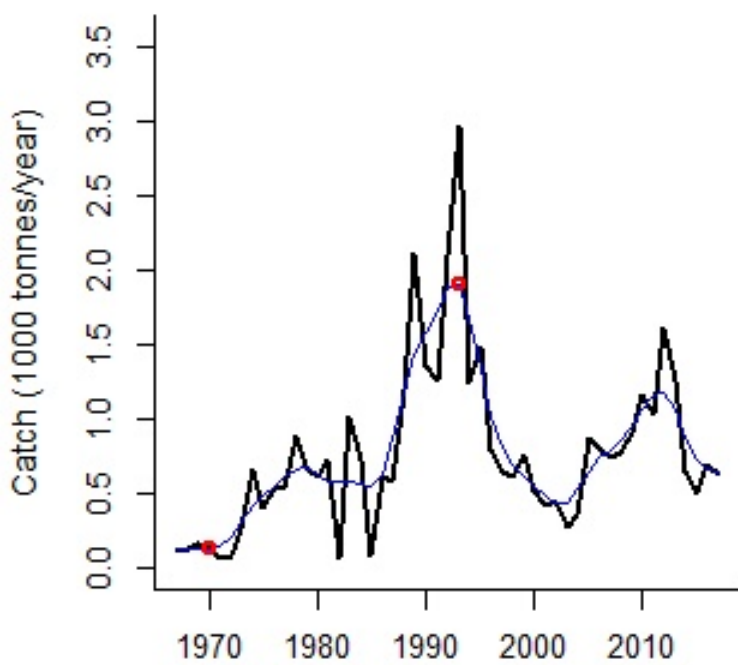

**B: Finding viable r-k**

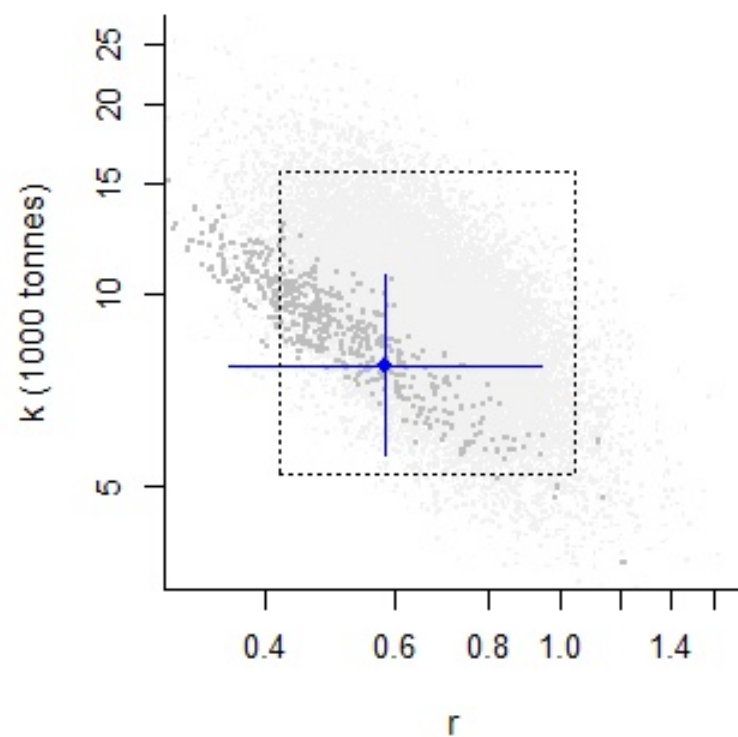

**C: Analysis of viable r-k**

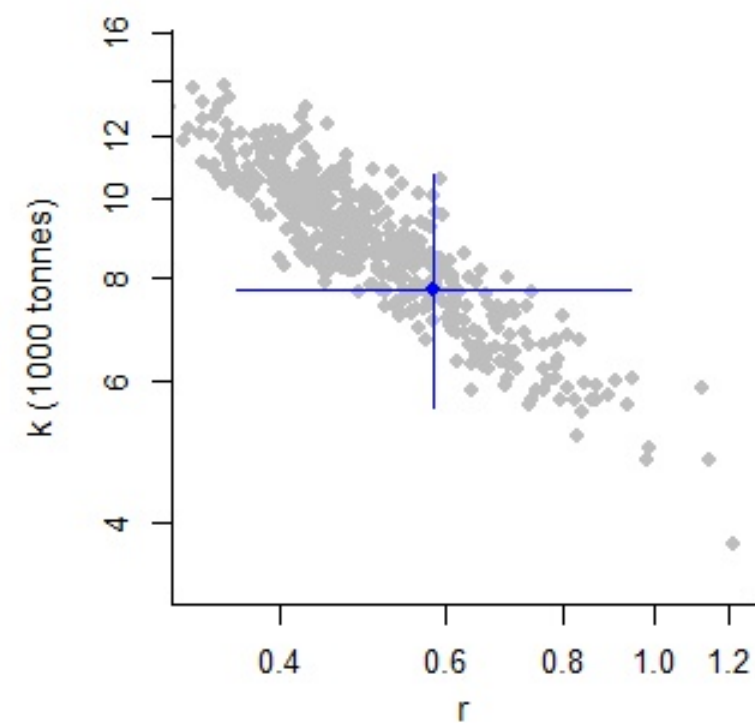

**D: Stock size**

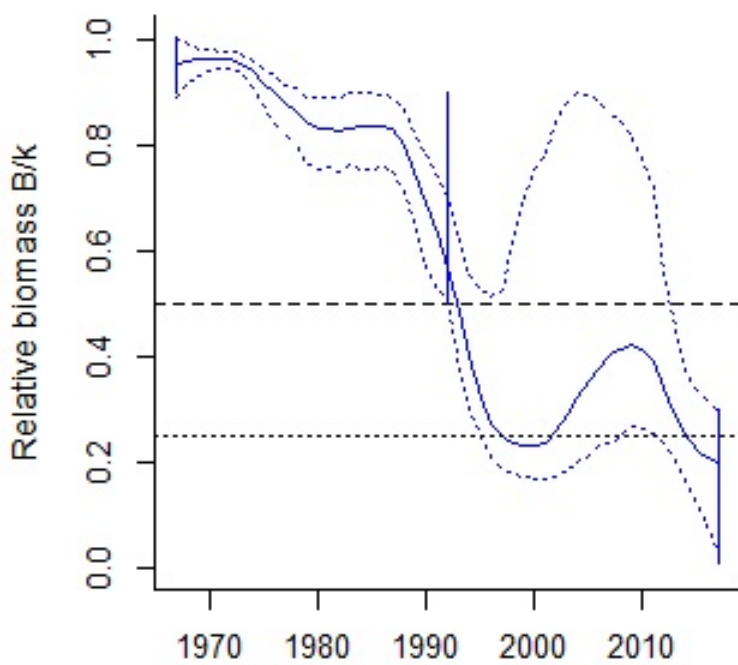

**E: Exploitation rate**

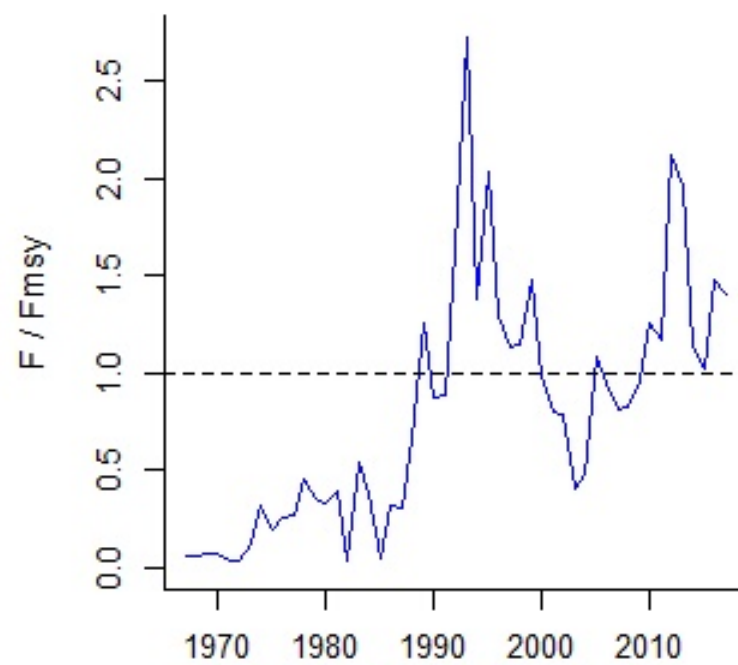

**F: Equilibrium curve**

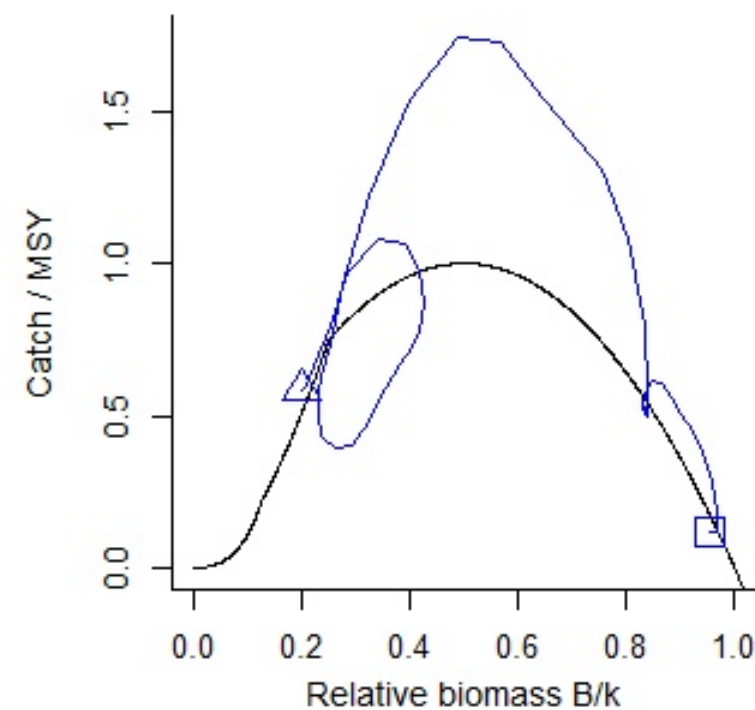

**Catch**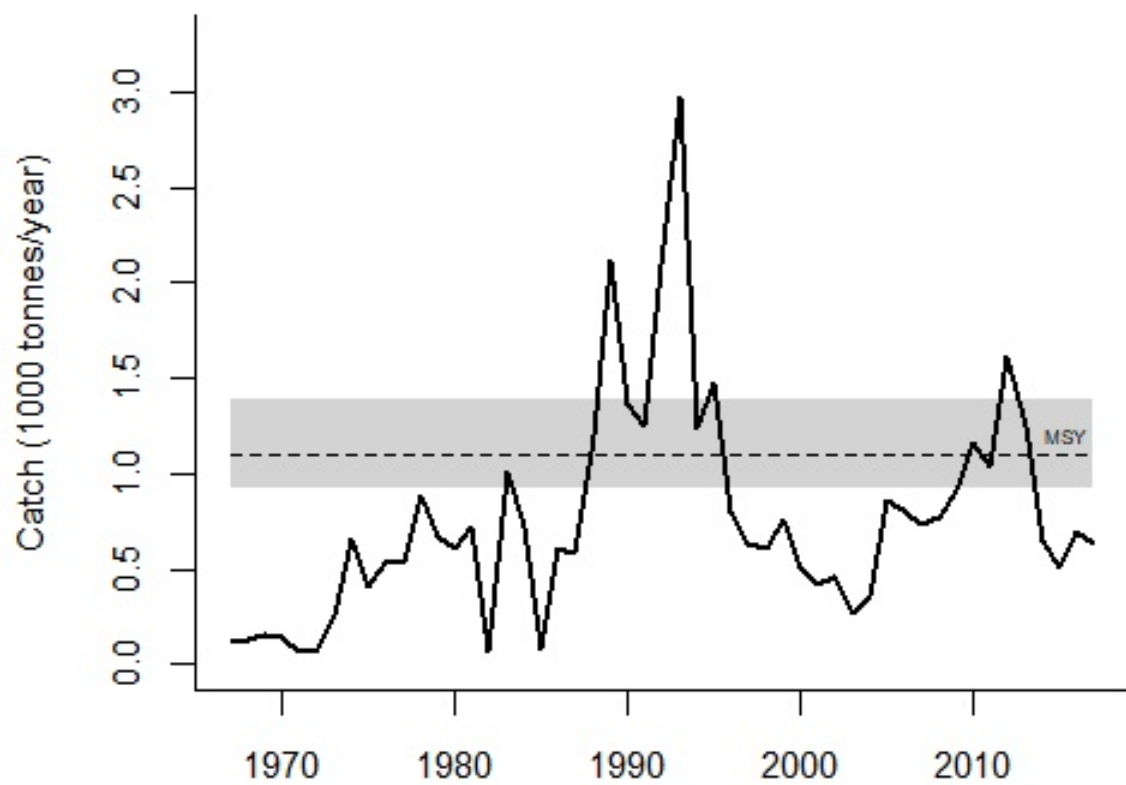**Stock size**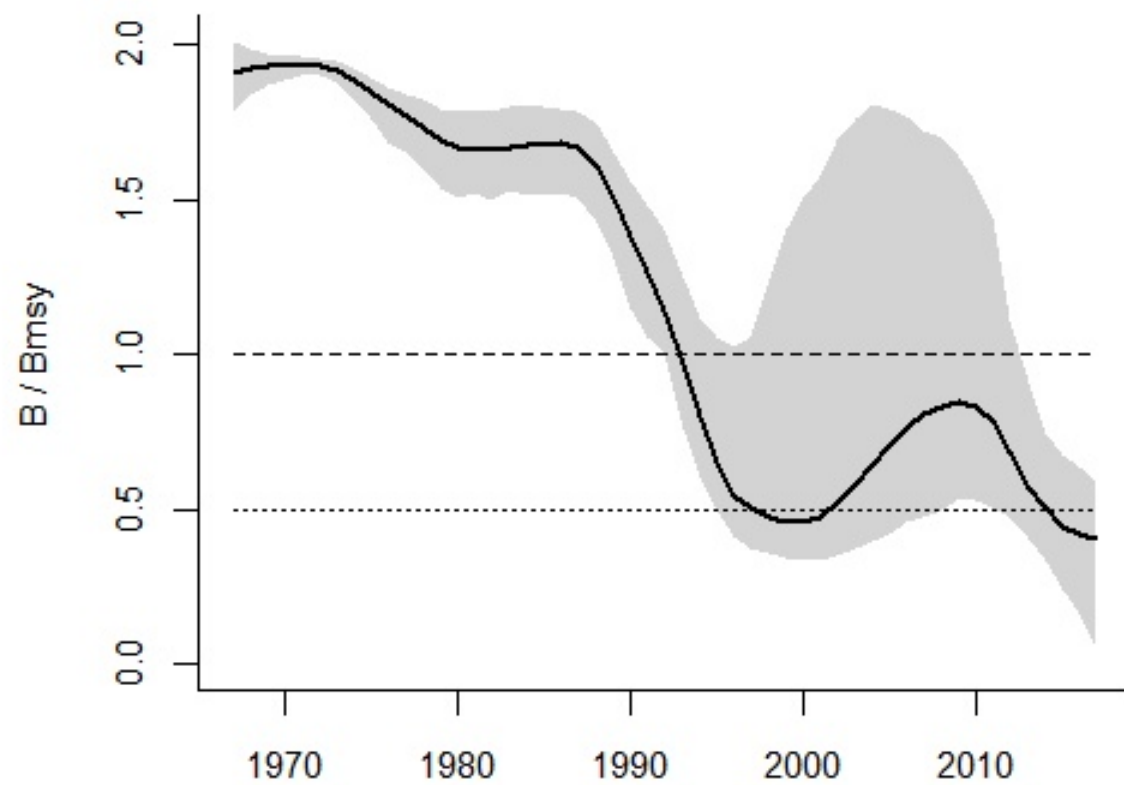**Exploitation**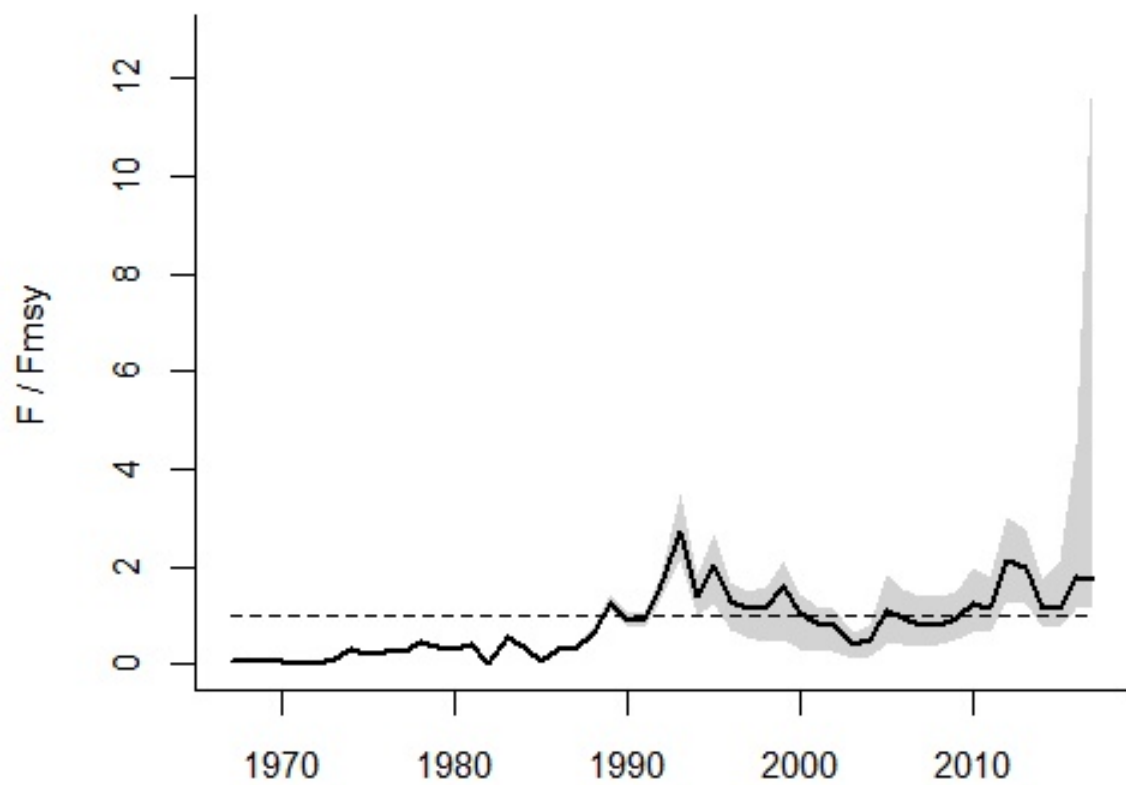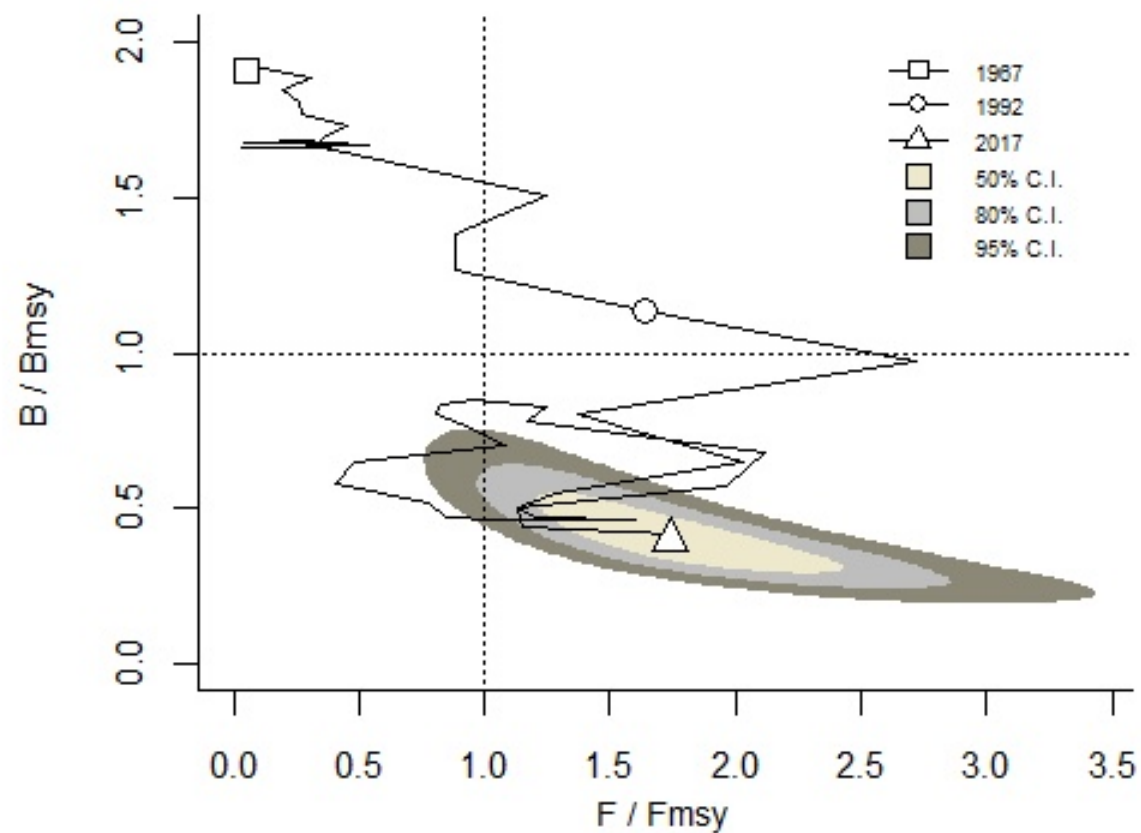

**A: Catch Surmullet\_Med**

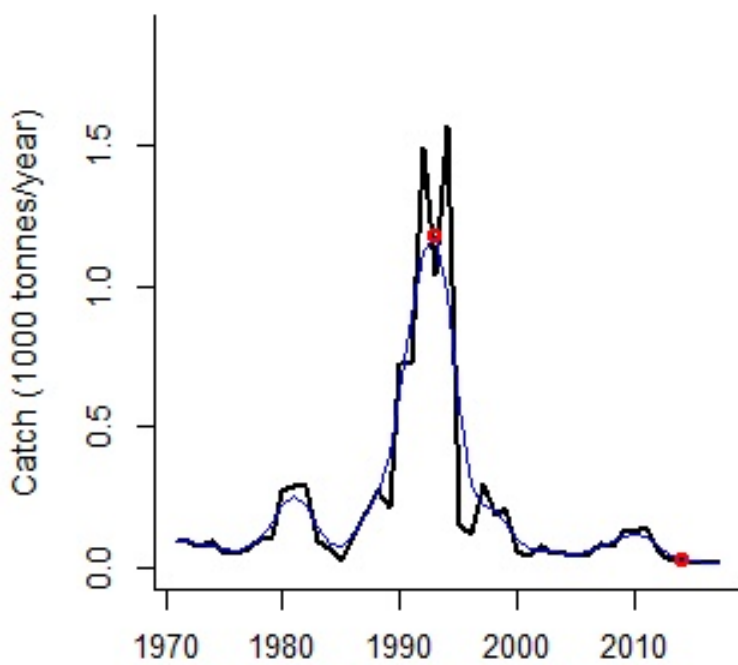

**B: Finding viable r-k**

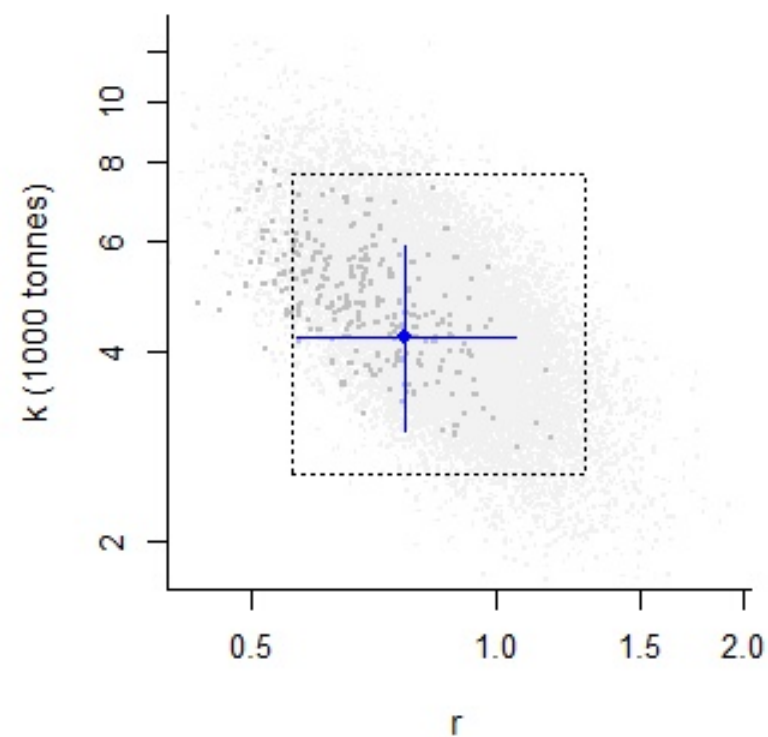

**C: Analysis of viable r-k**

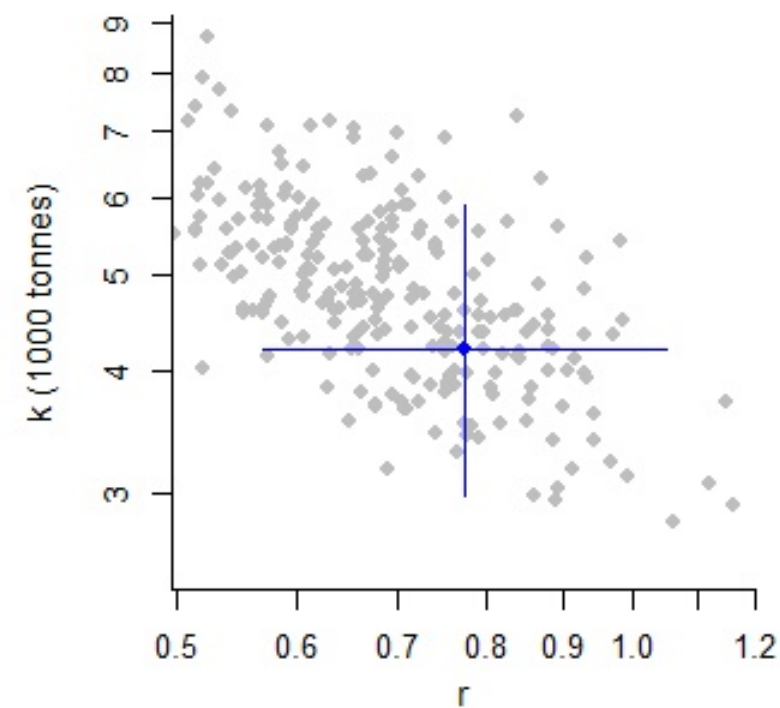

**D: Stock size**

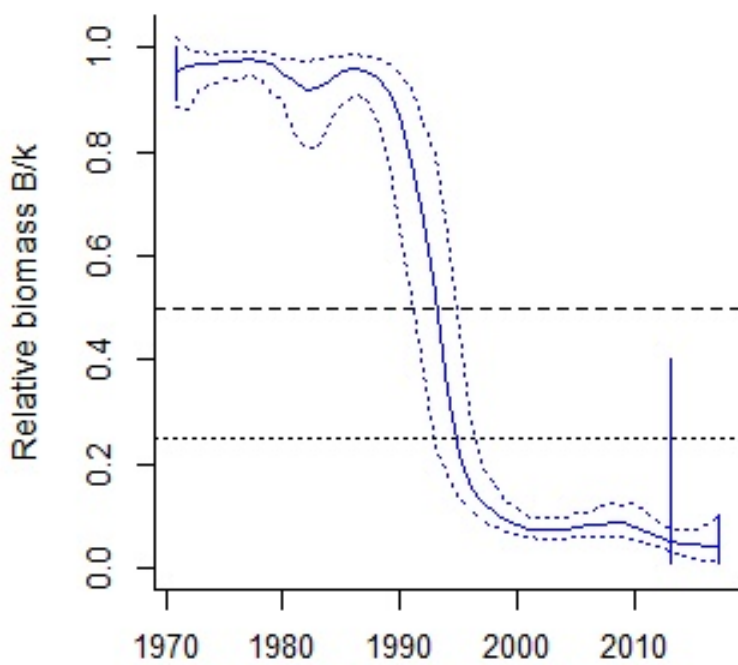

**E: Exploitation rate**

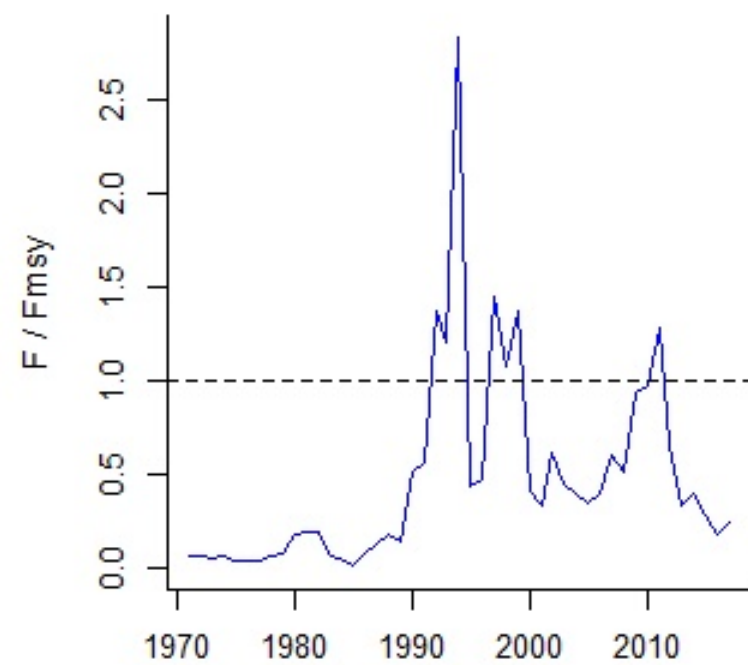

**F: Equilibrium curve**

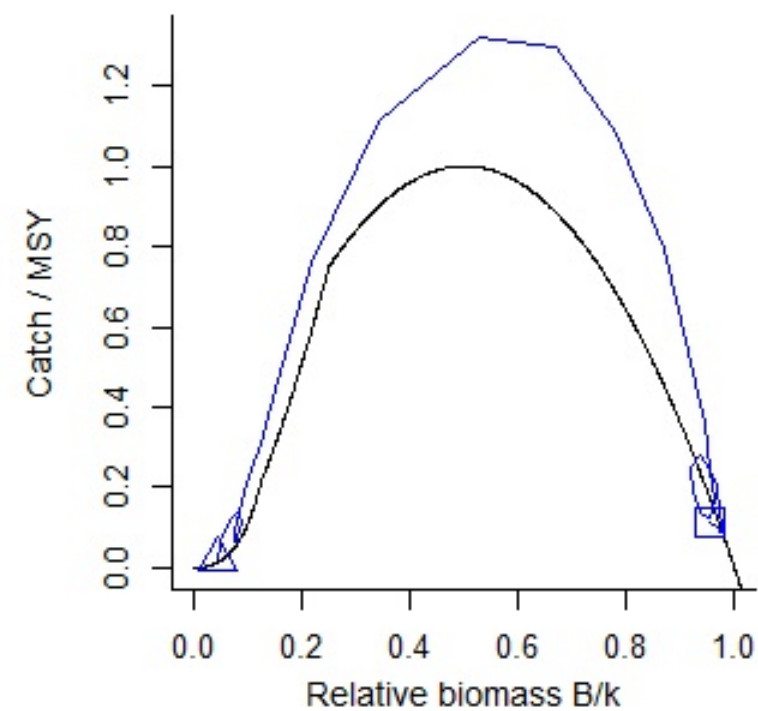



**Catch**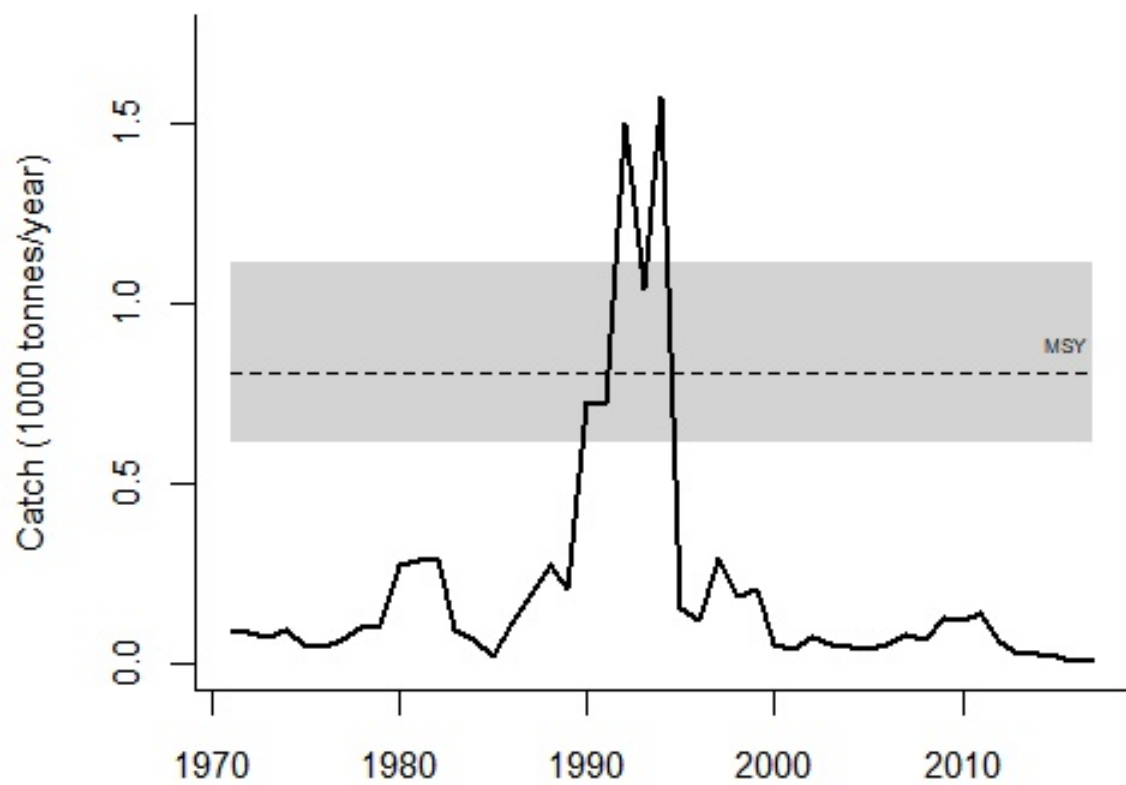**Stock size**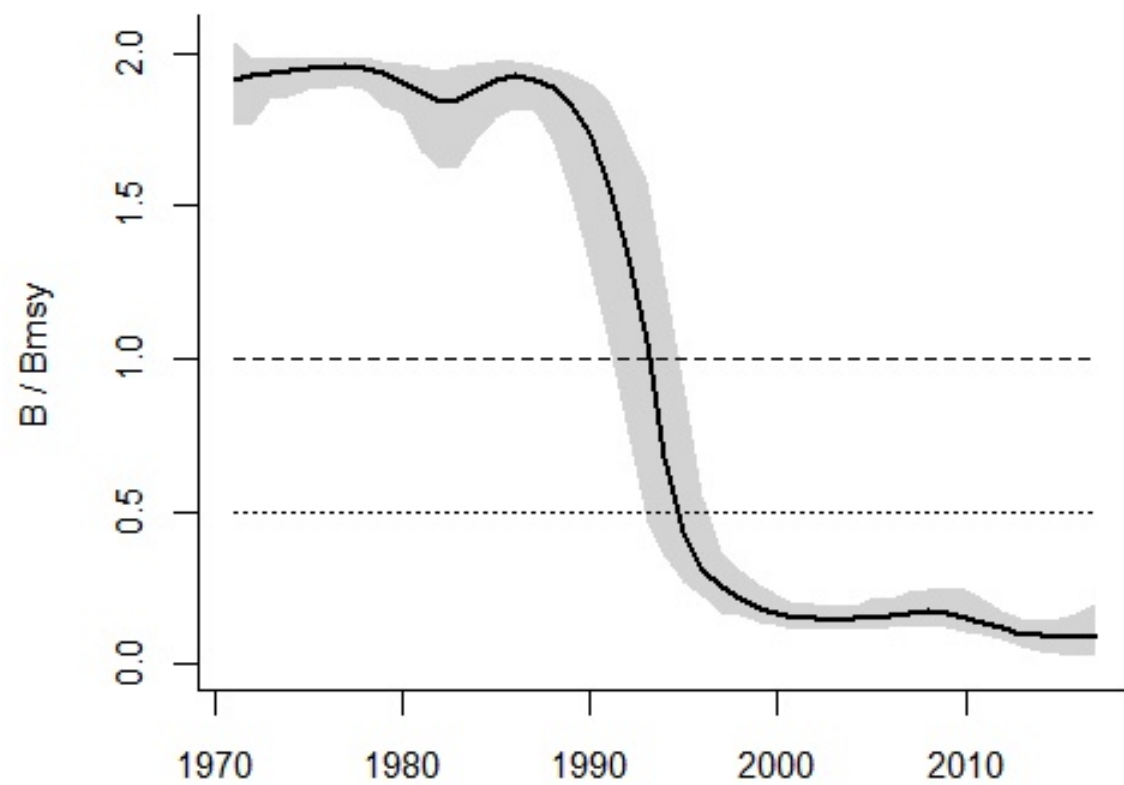**Exploitation**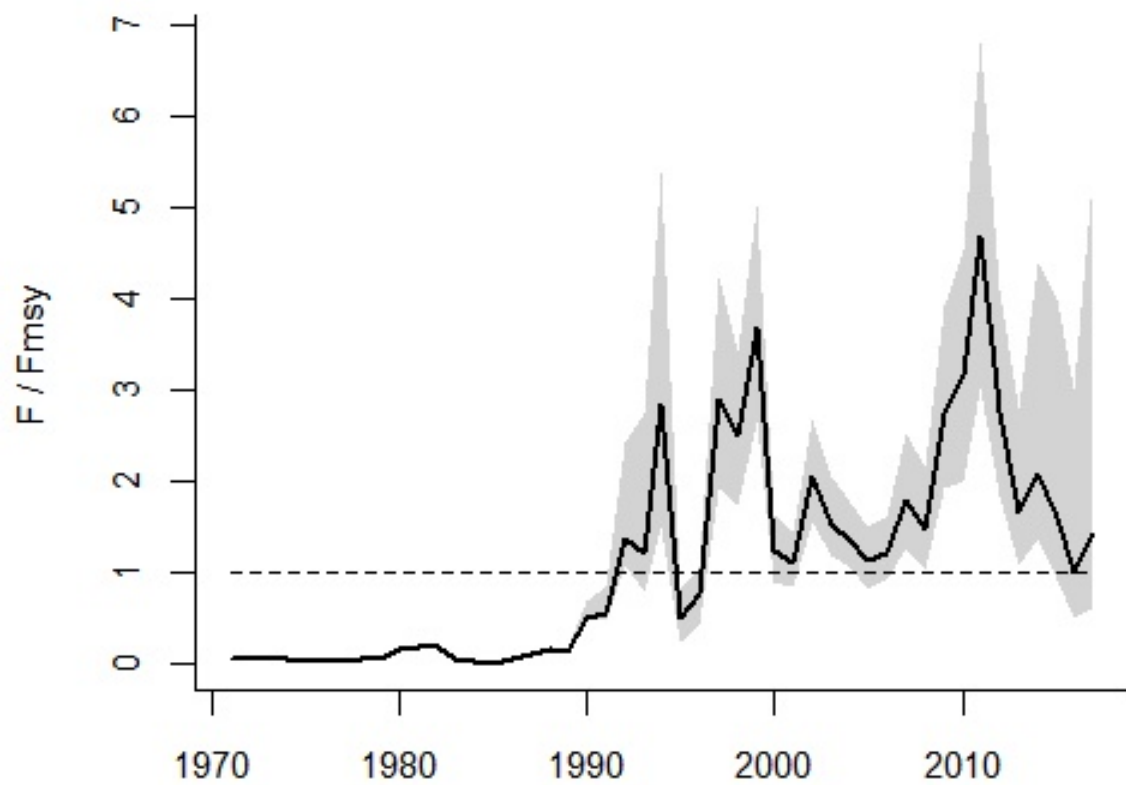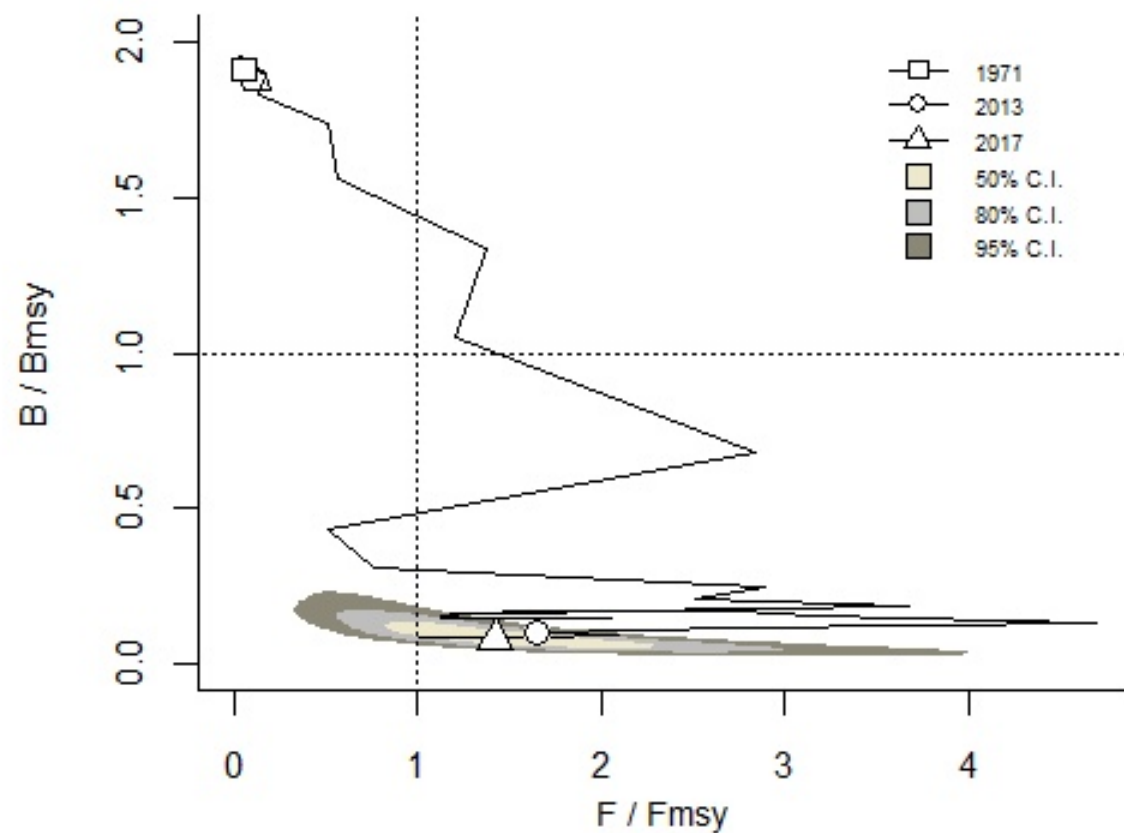

**A: Catch Meagre\_Med**

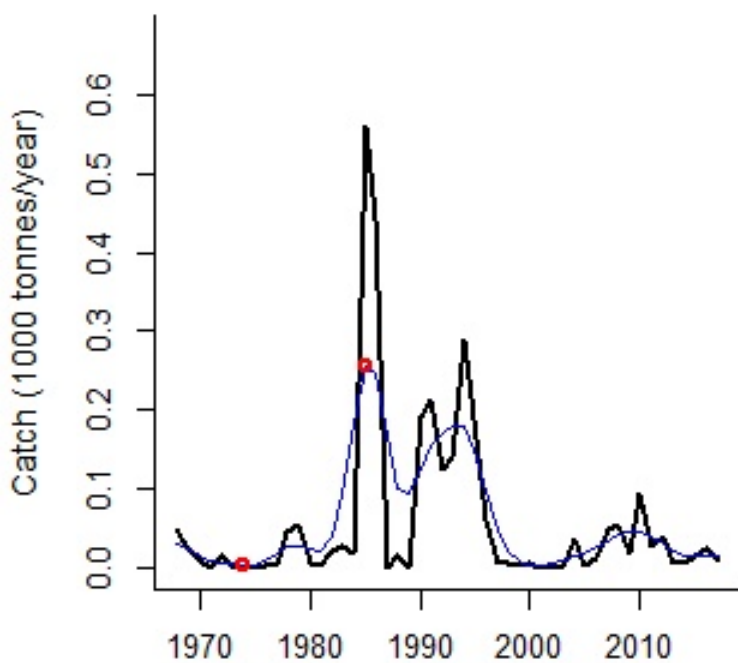

**B: Finding viable r-k**

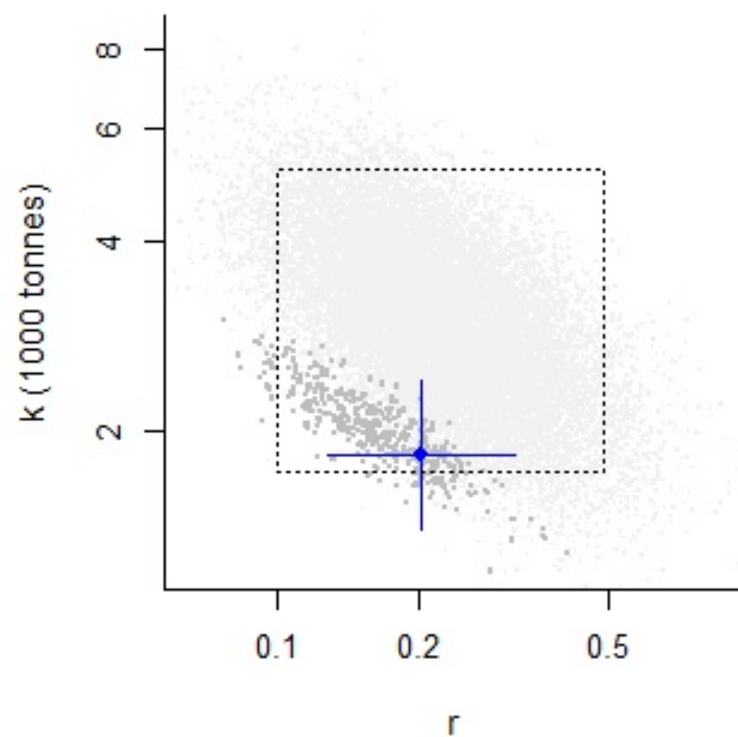

**C: Analysis of viable r-k**

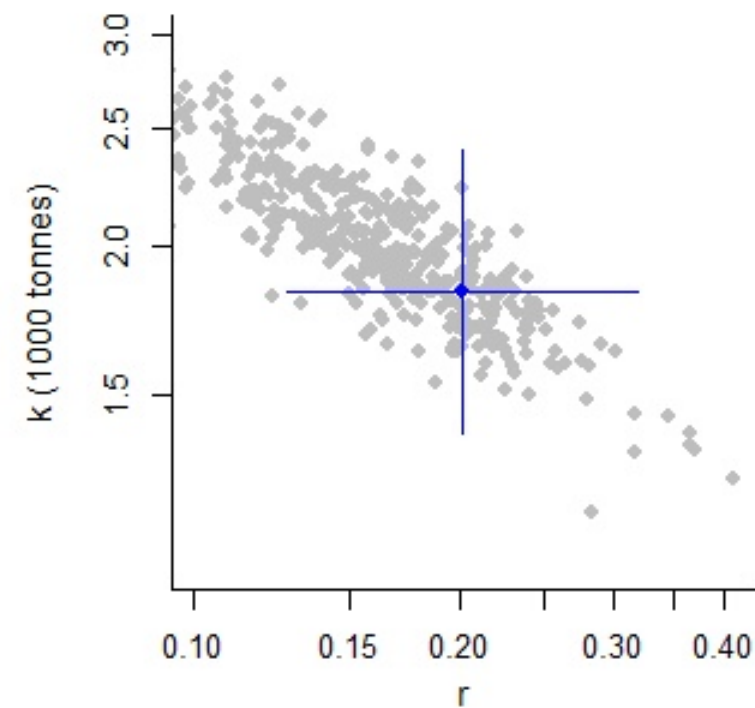

**D: Stock size**

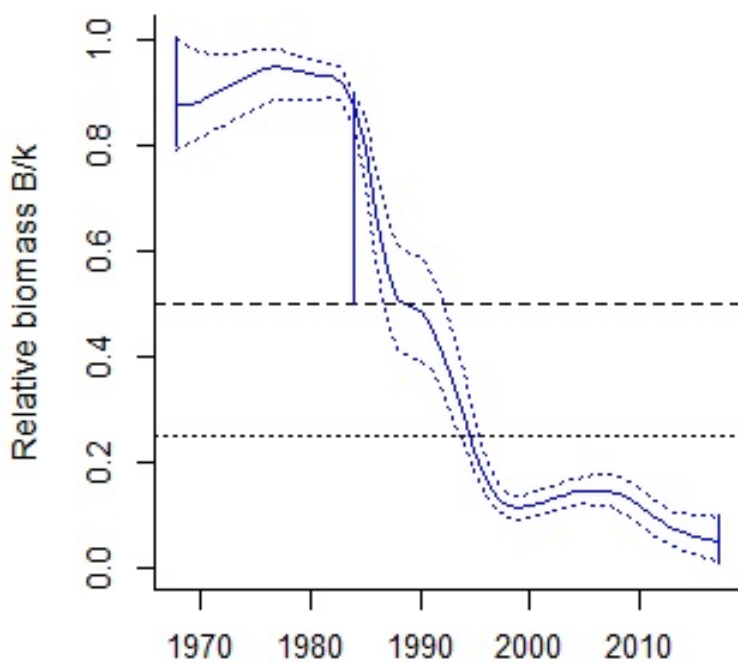

**E: Exploitation rate**

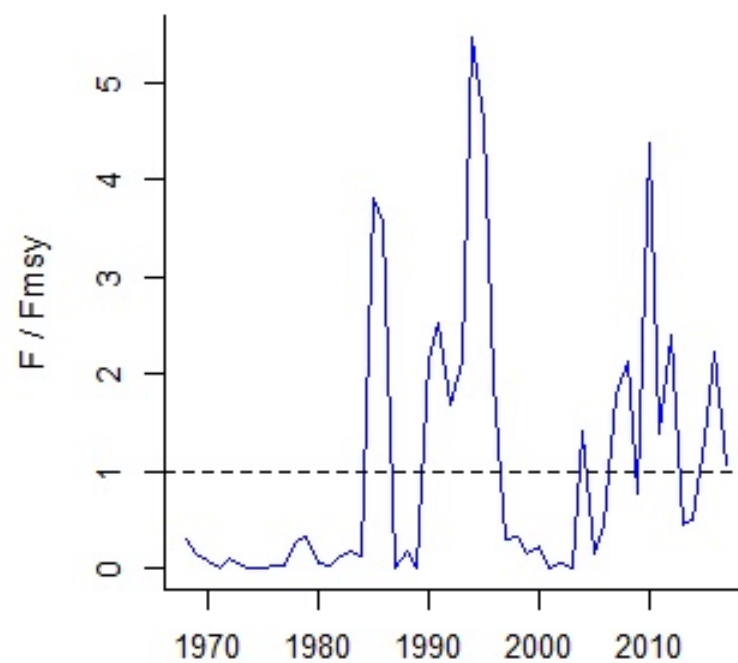

**F: Equilibrium curve**

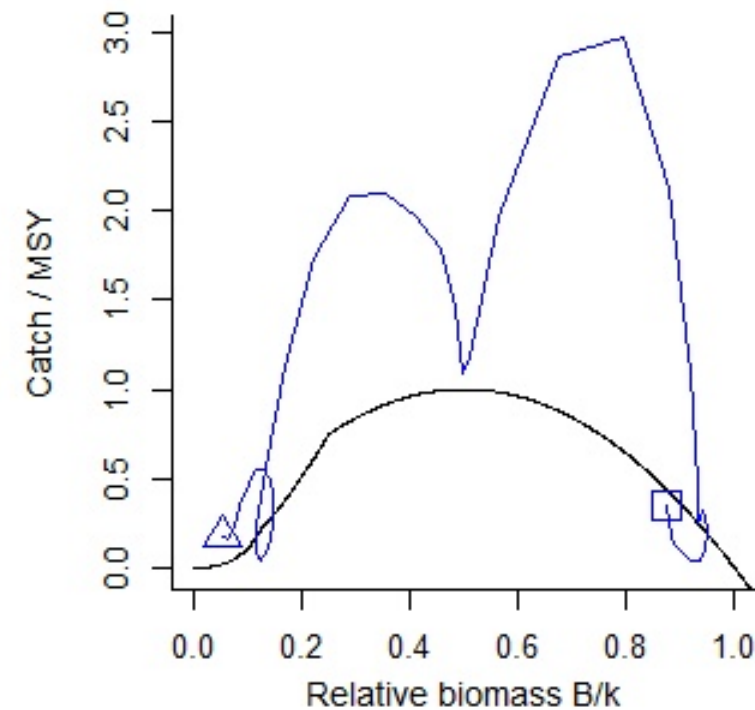

**Catch**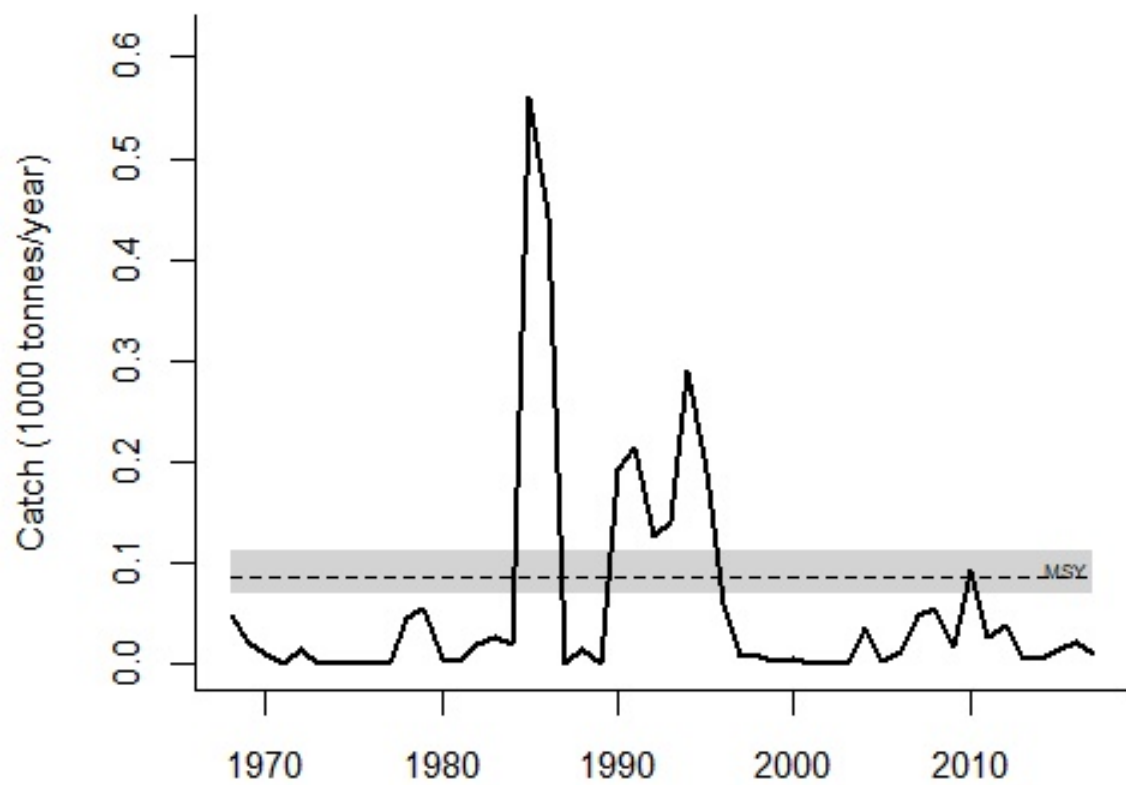**Stock size**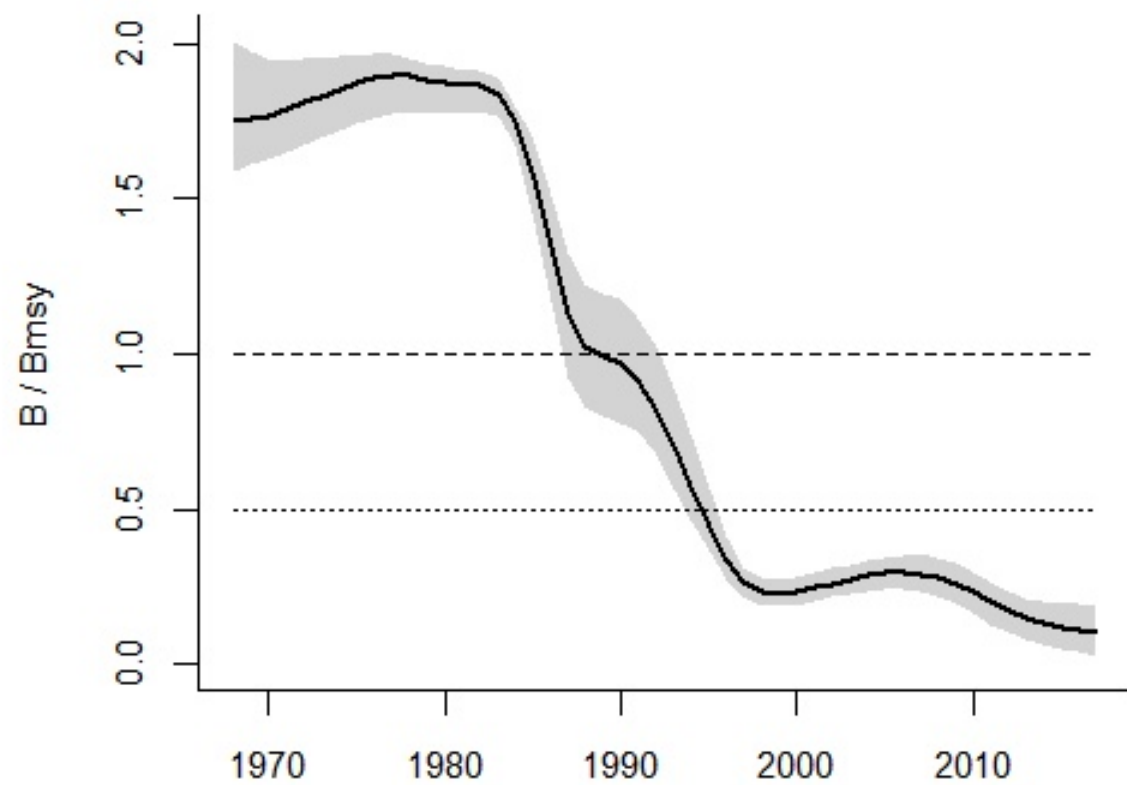**Exploitation**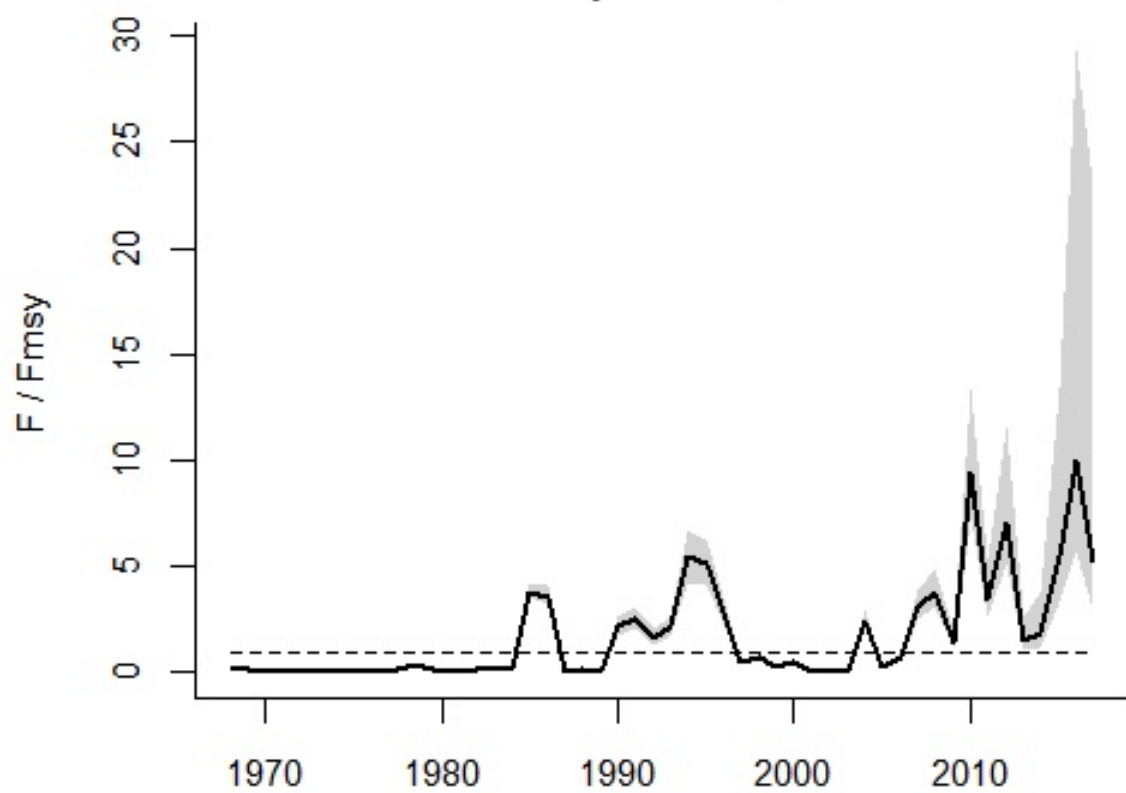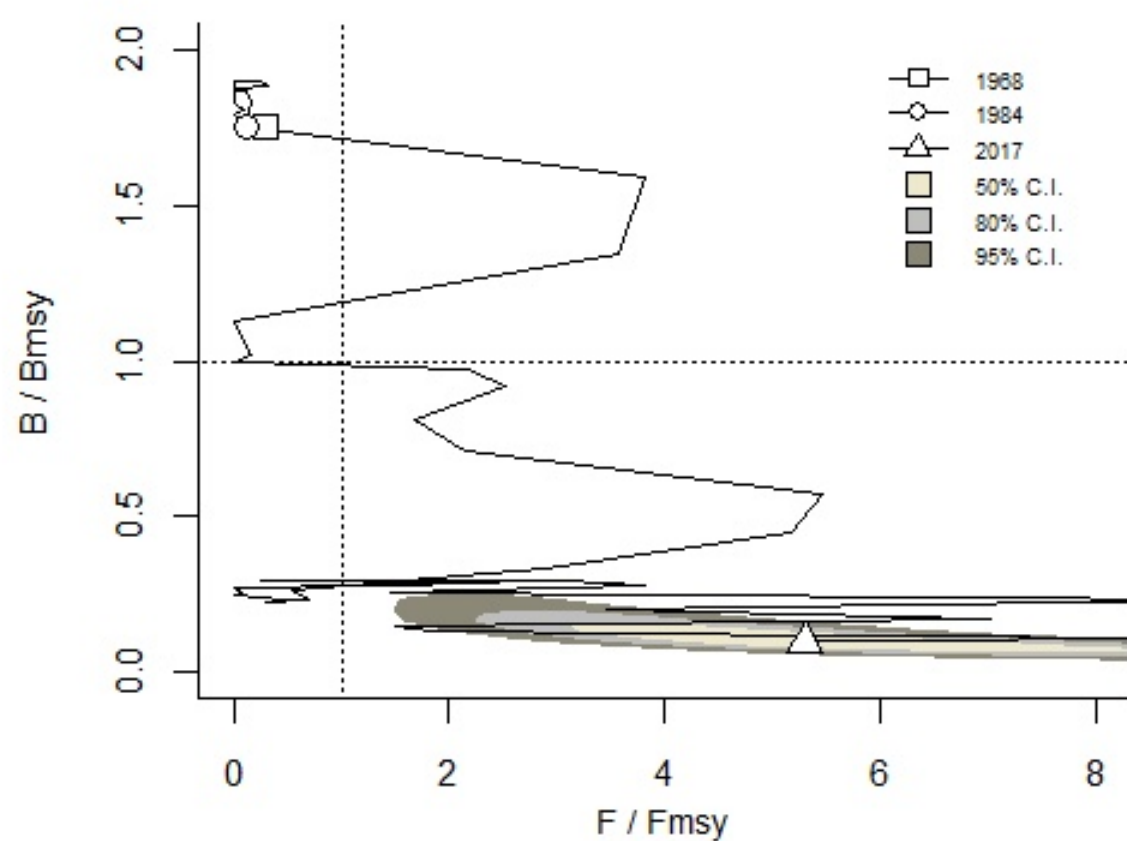

**A: Catch Dentex\_Med**

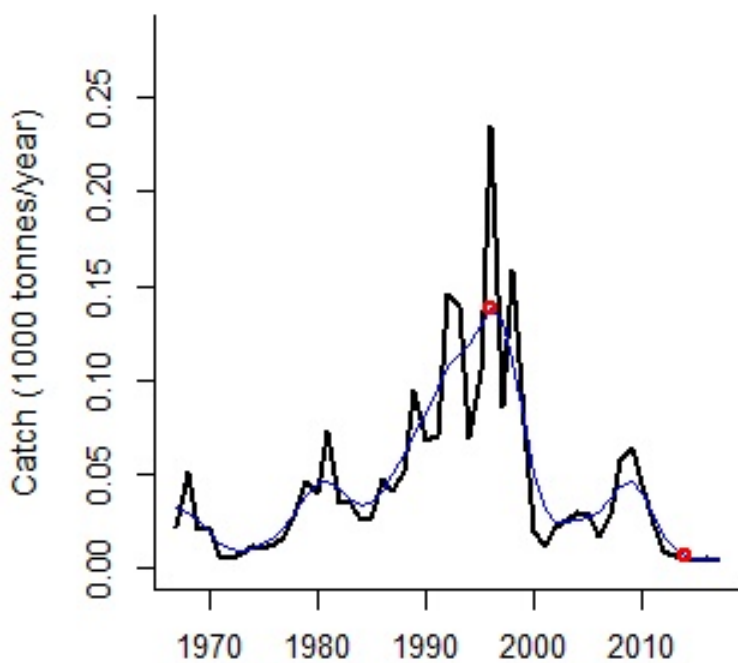

**B: Finding viable r-k**

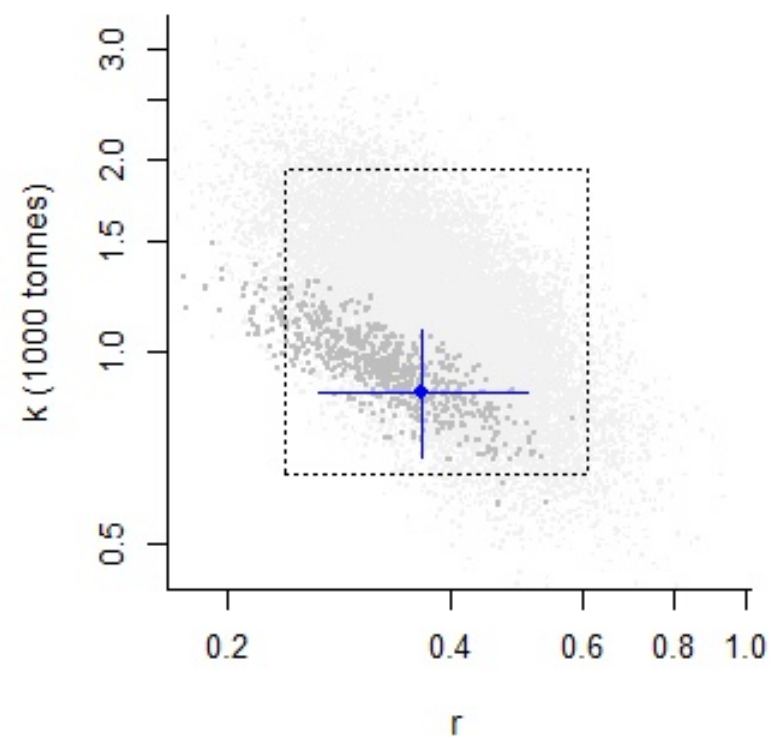

**C: Analysis of viable r-k**

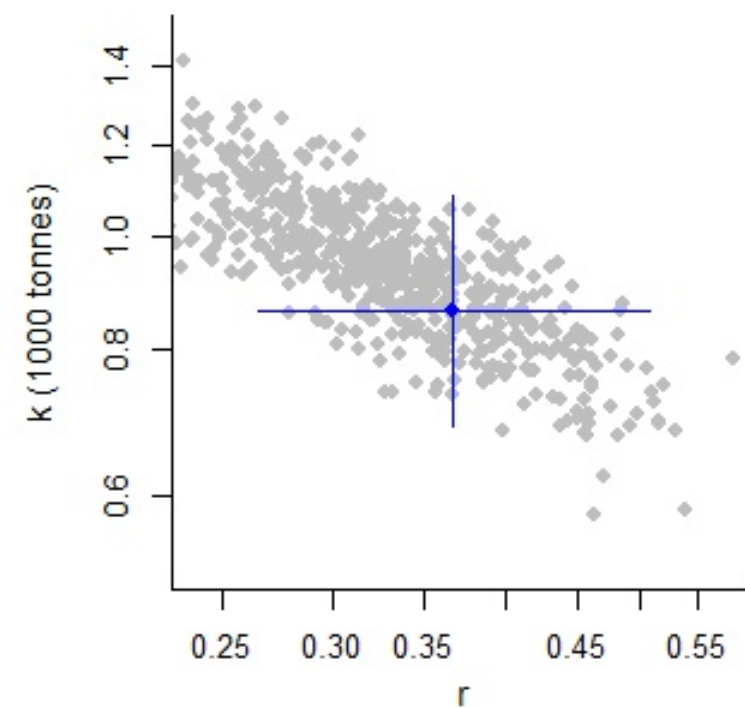

**D: Stock size**

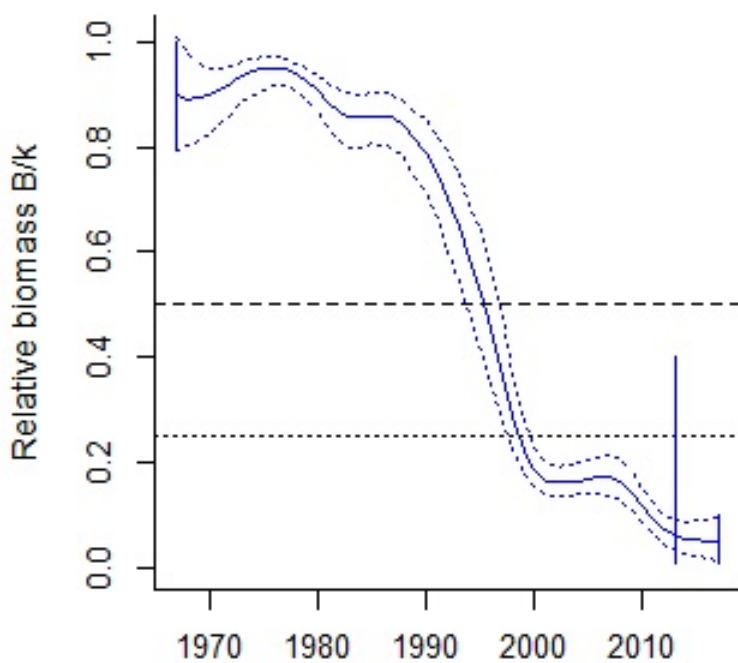

**E: Exploitation rate**

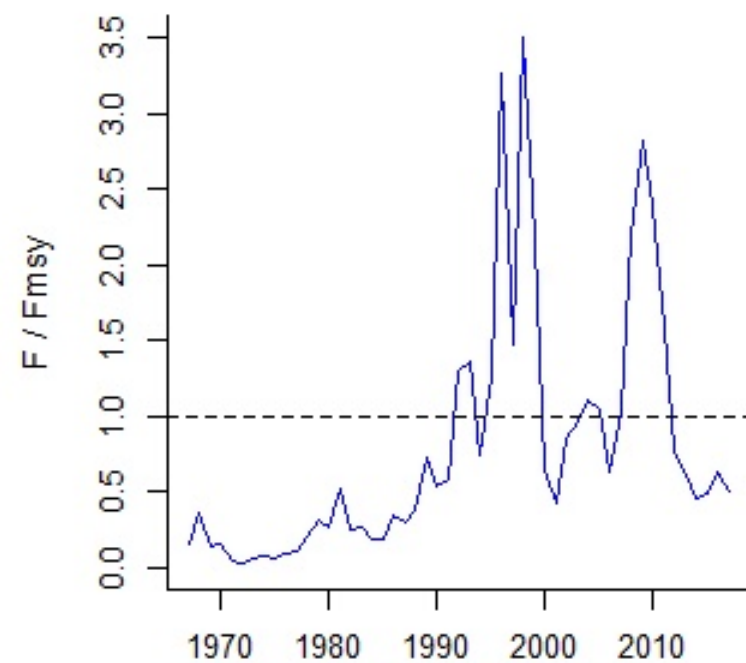

**F: Equilibrium curve**

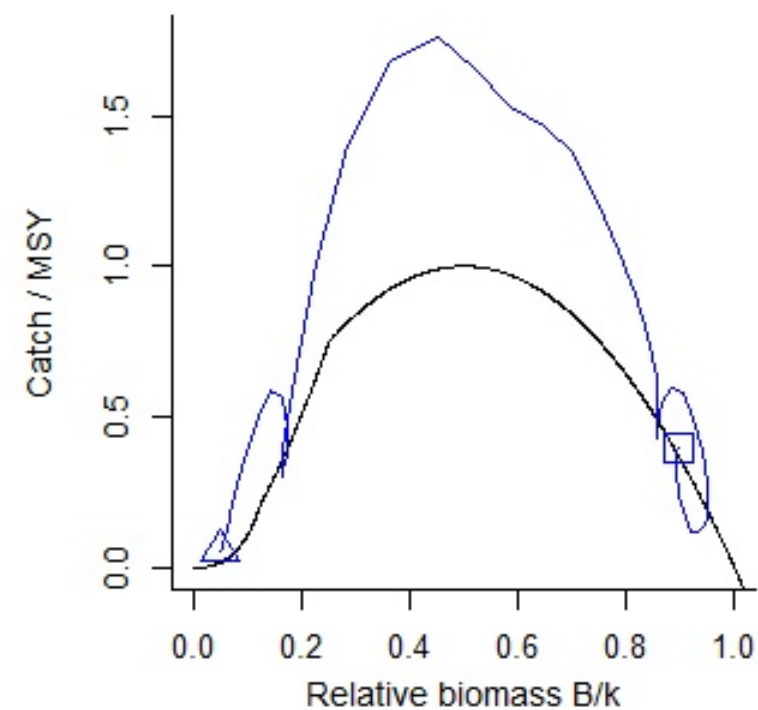



**Catch**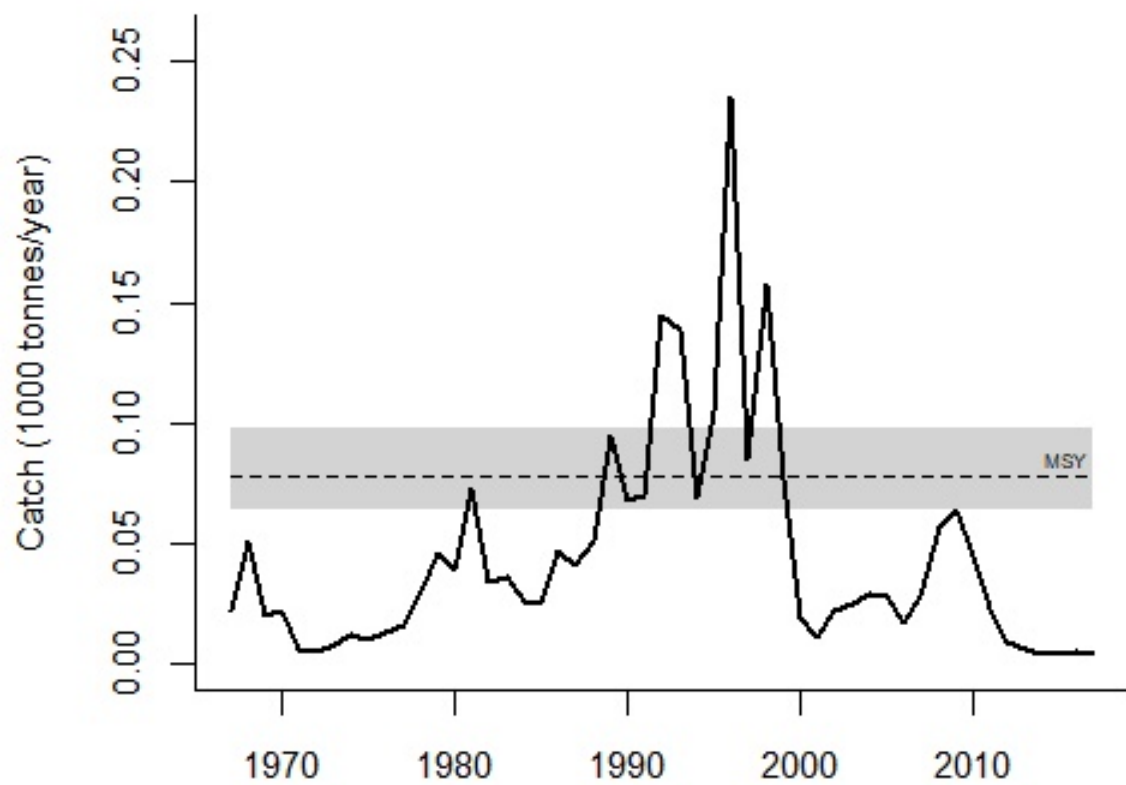**Stock size**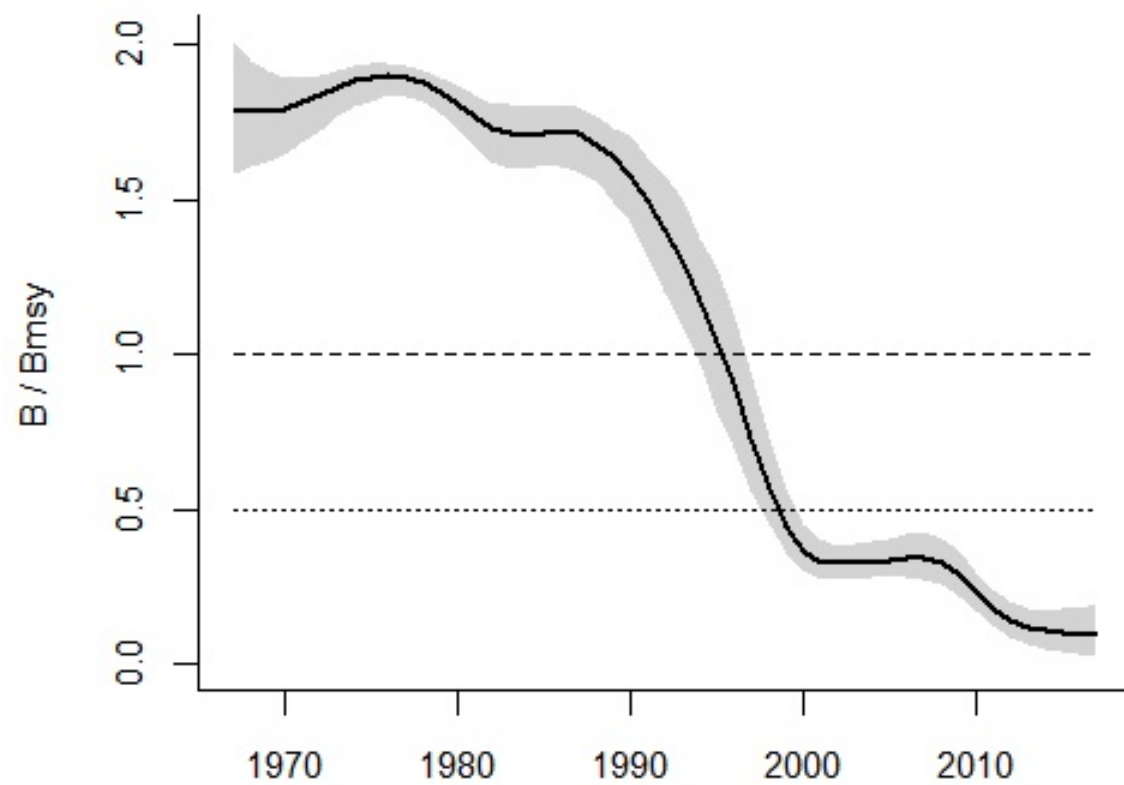**Exploitation**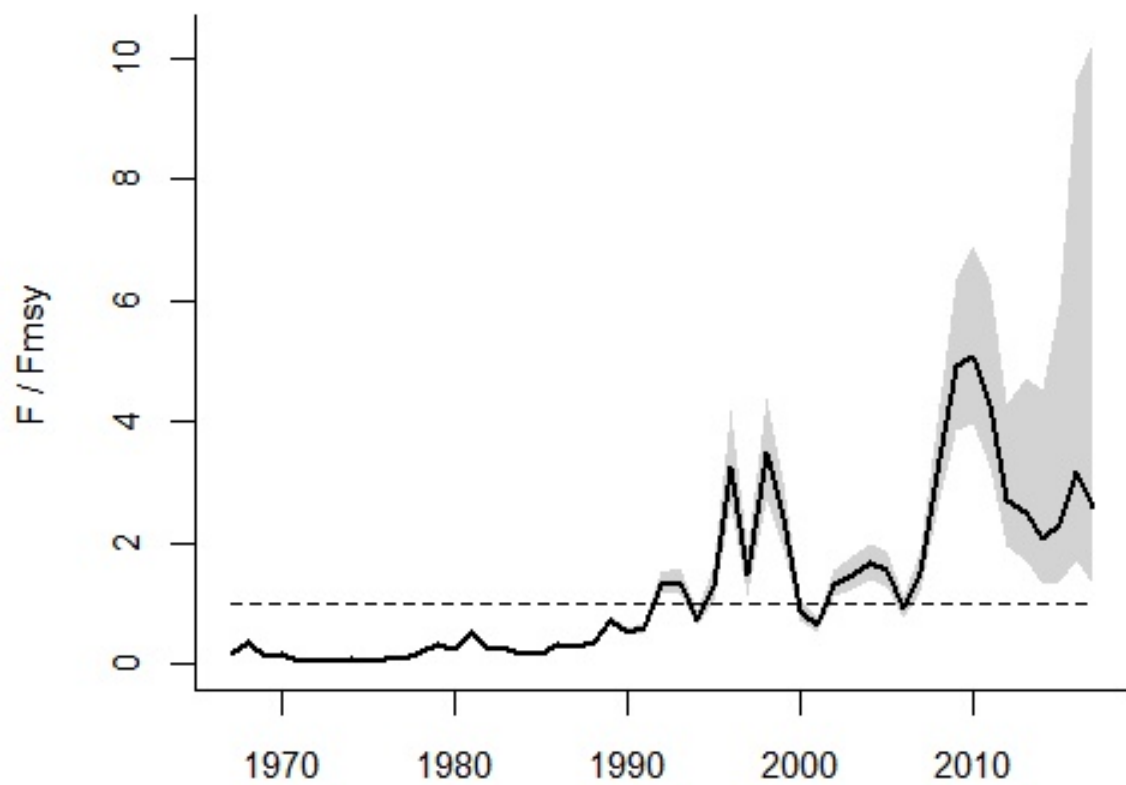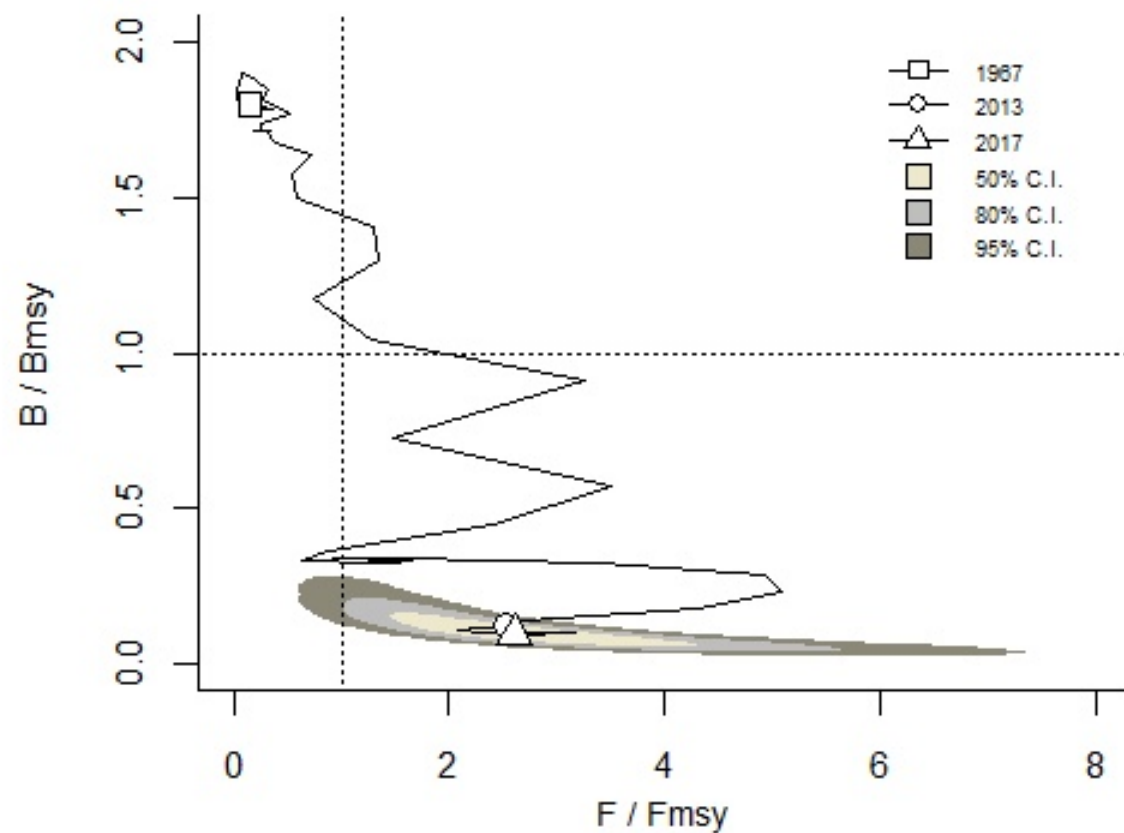

**A: Catch Conger\_Med**

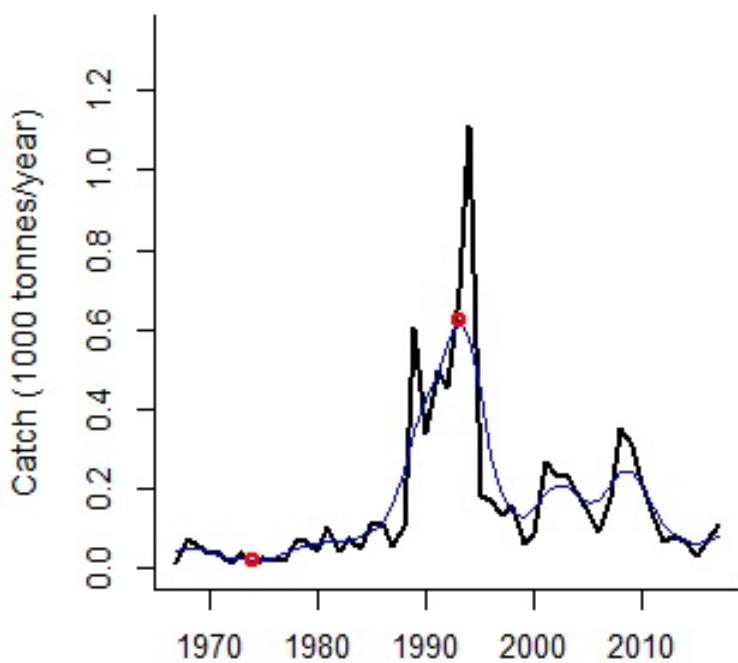

**B: Finding viable r-k**

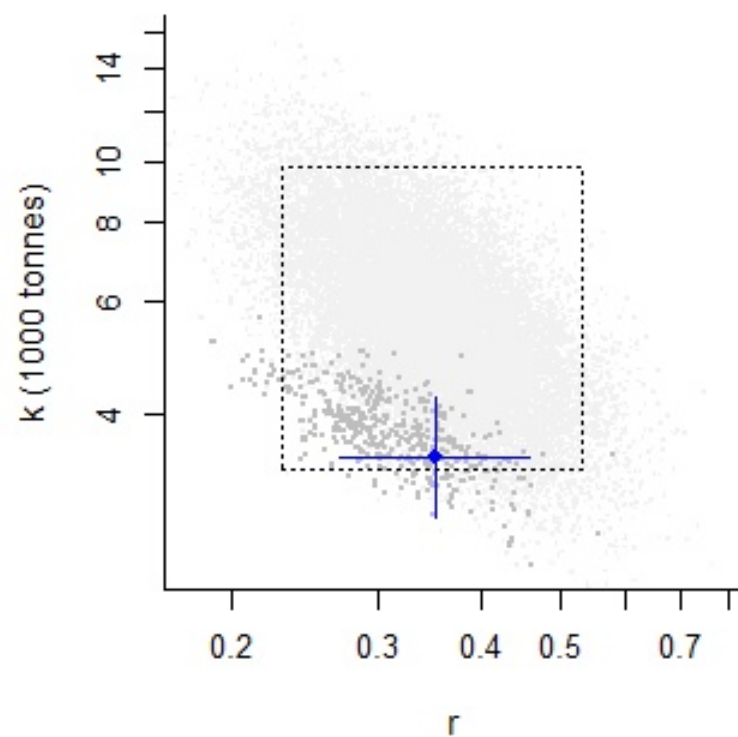

**C: Analysis of viable r-k**

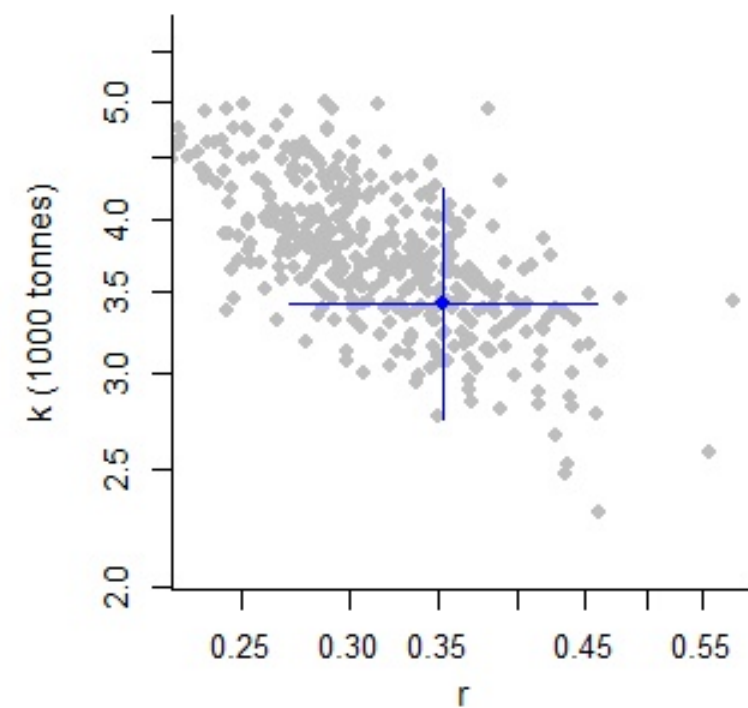

**D: Stock size**

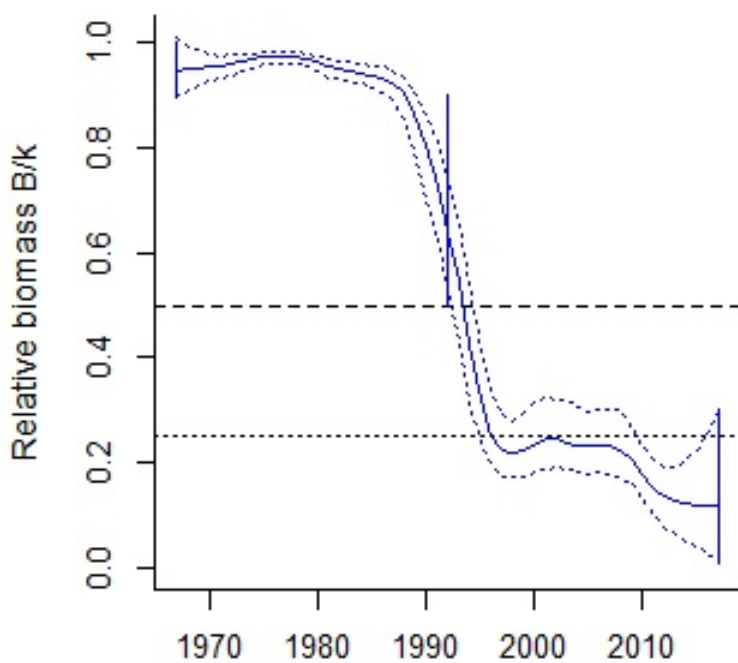

**E: Exploitation rate**

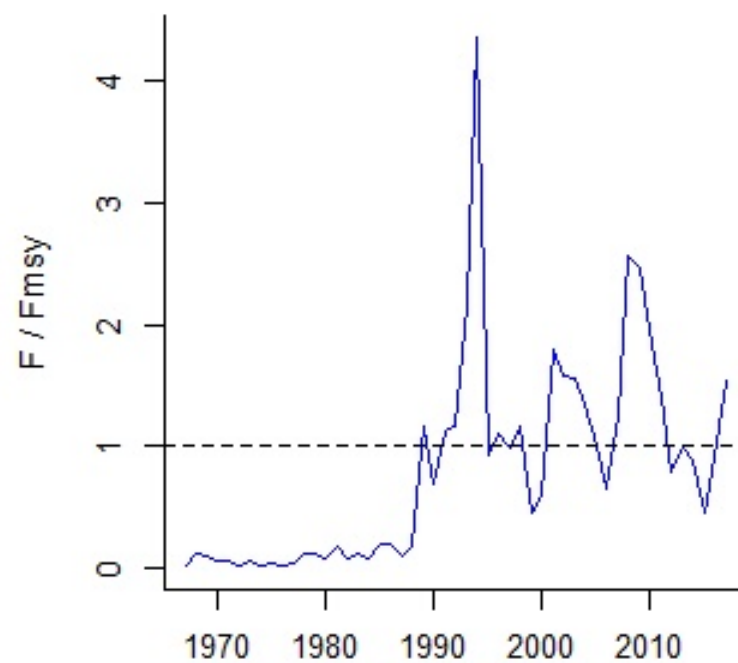

**F: Equilibrium curve**

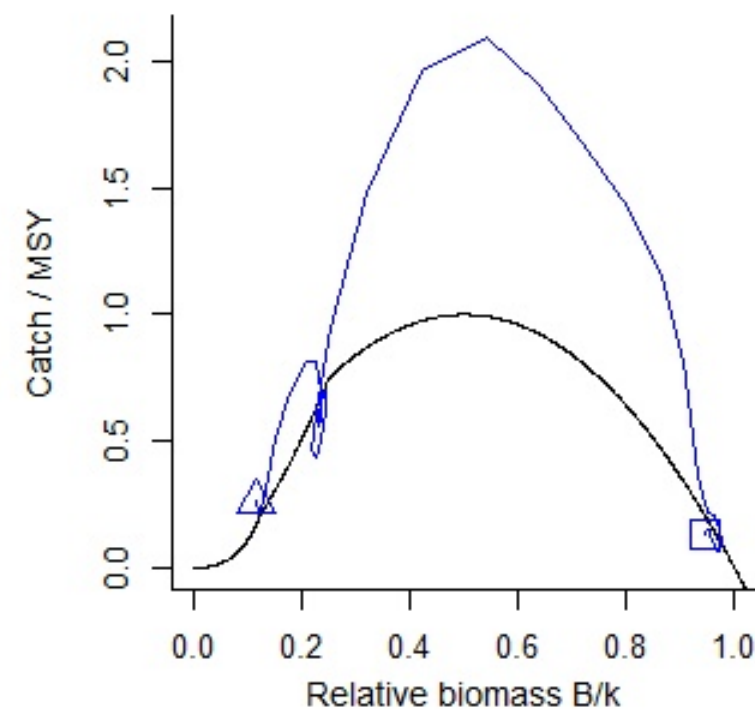

**Catch**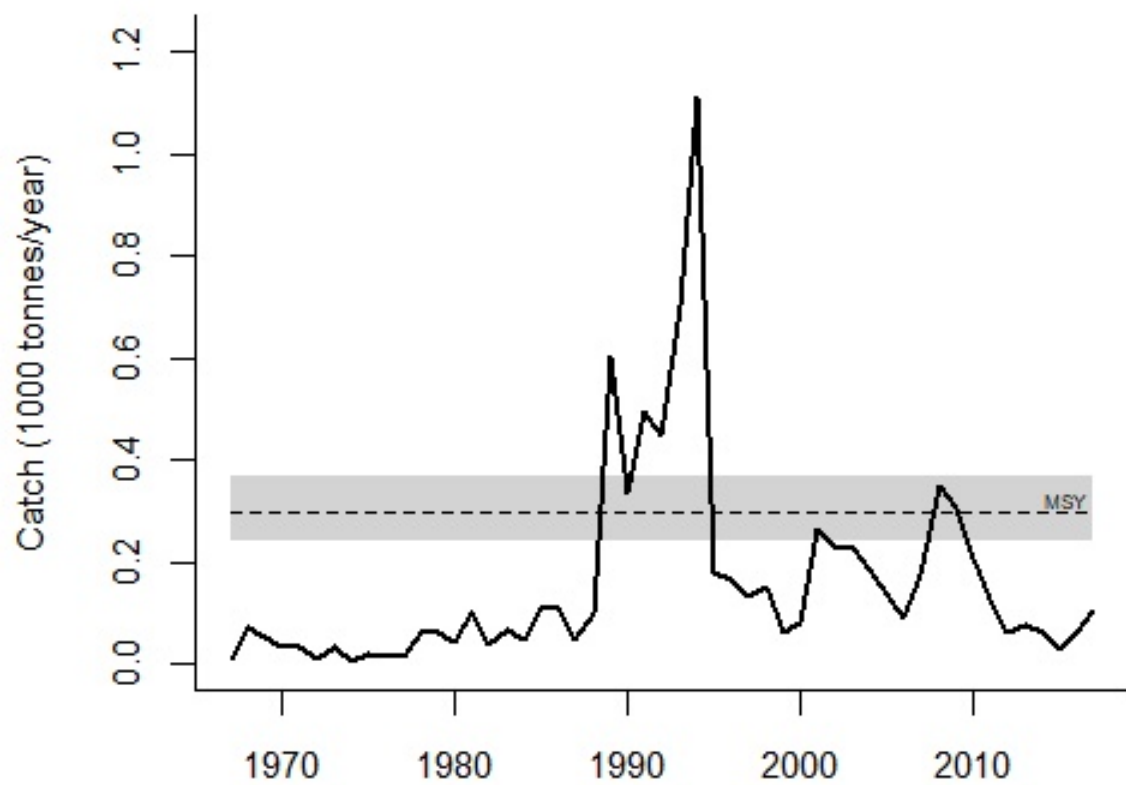**Stock size**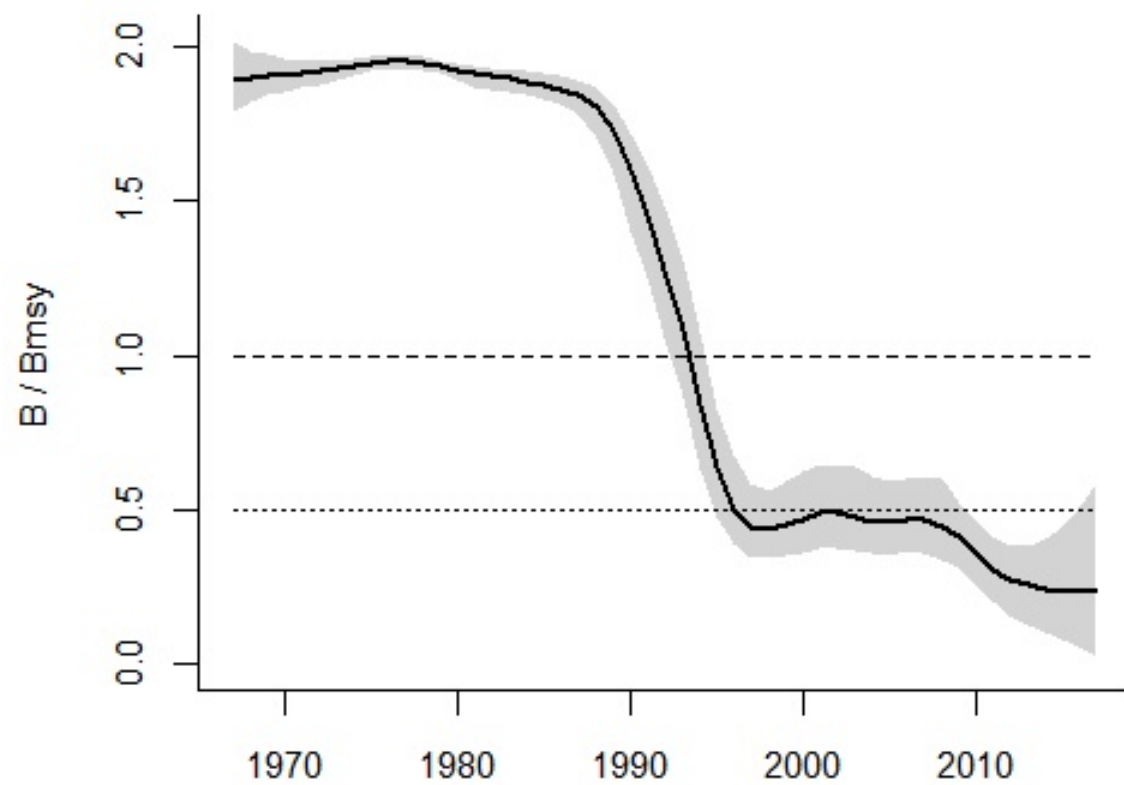**Exploitation**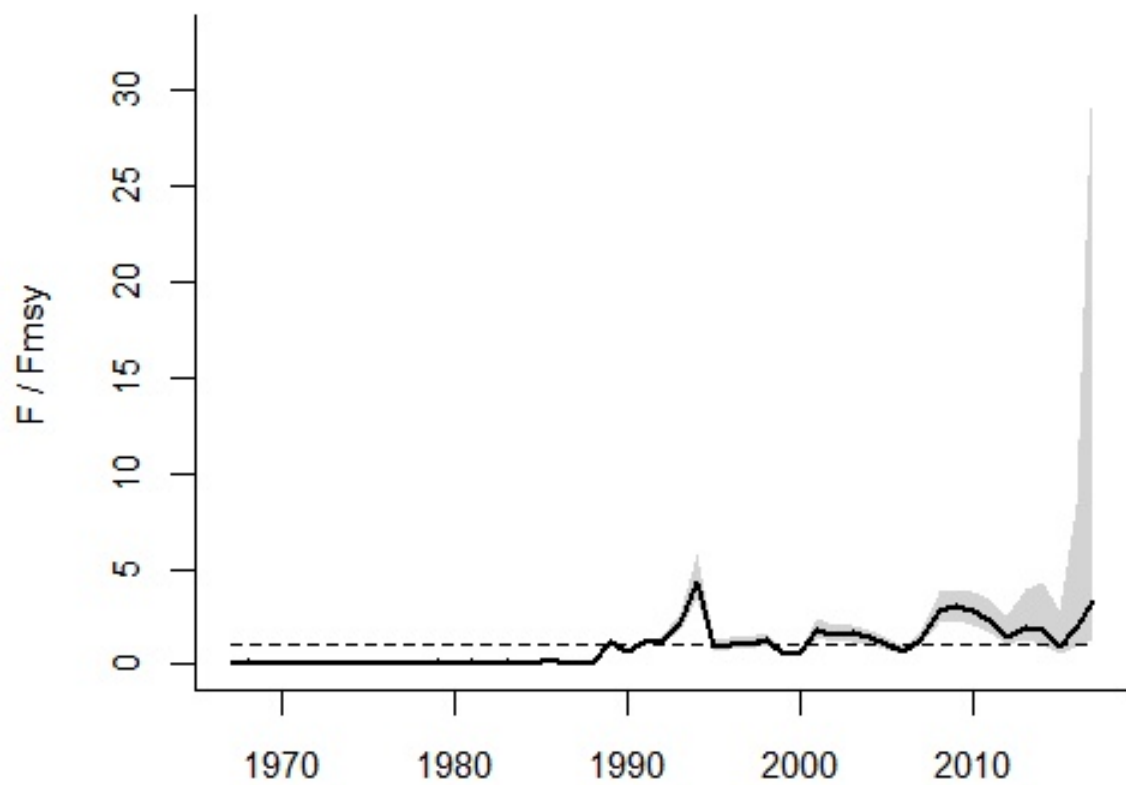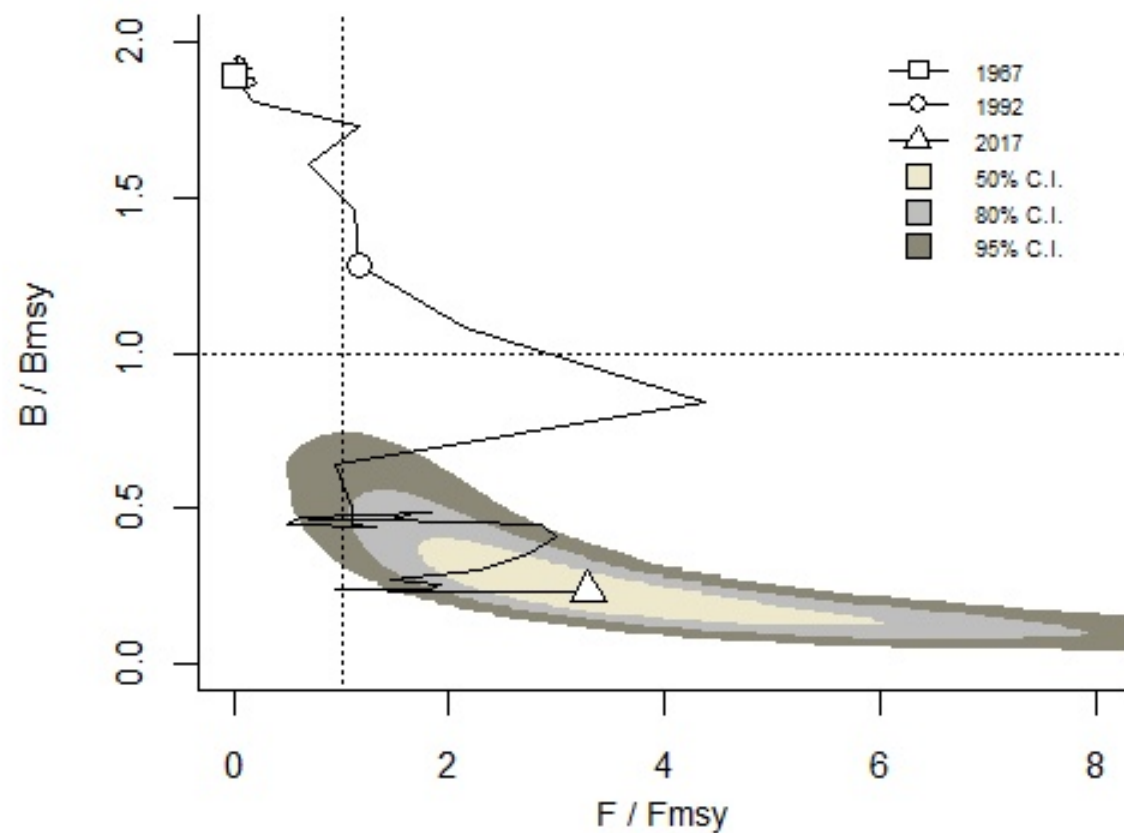

**A: Catch Annular\_Med**

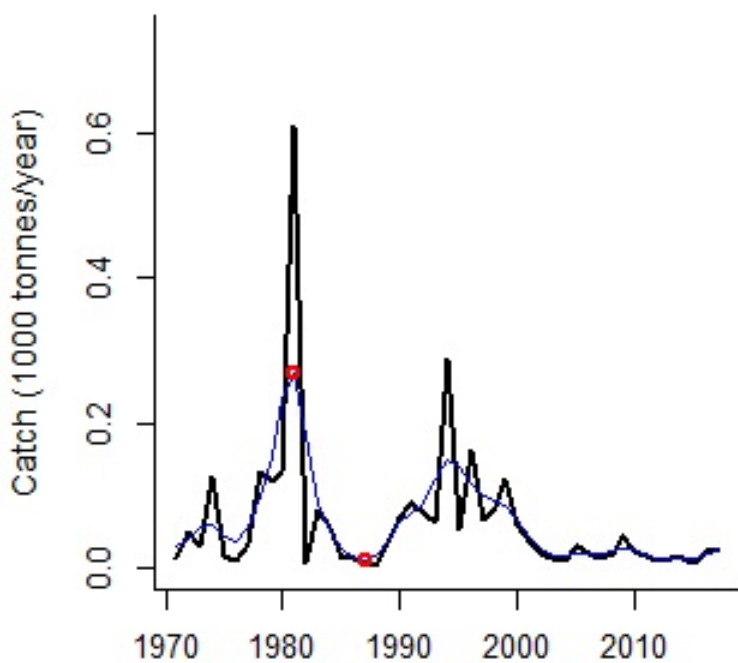

**B: Finding viable r-k**

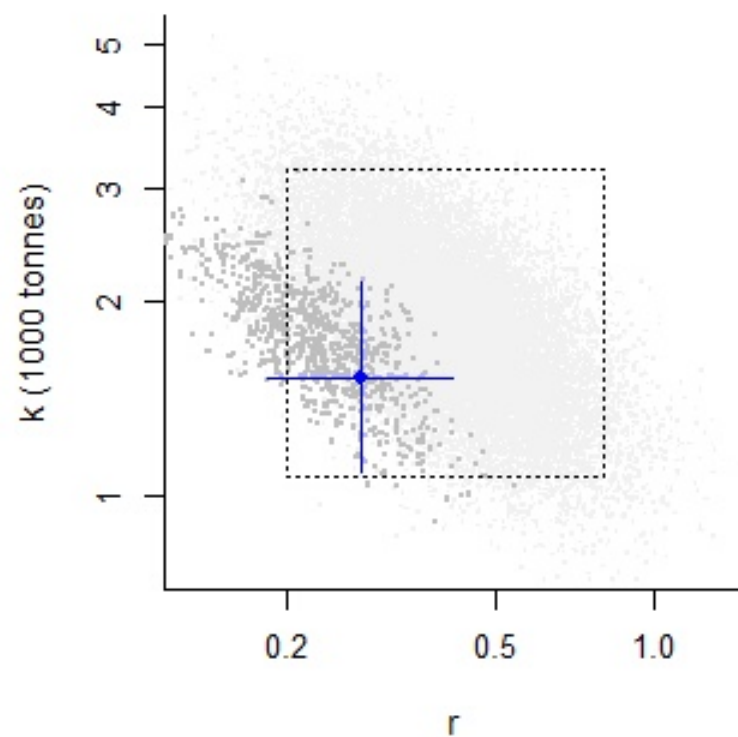

**C: Analysis of viable r-k**

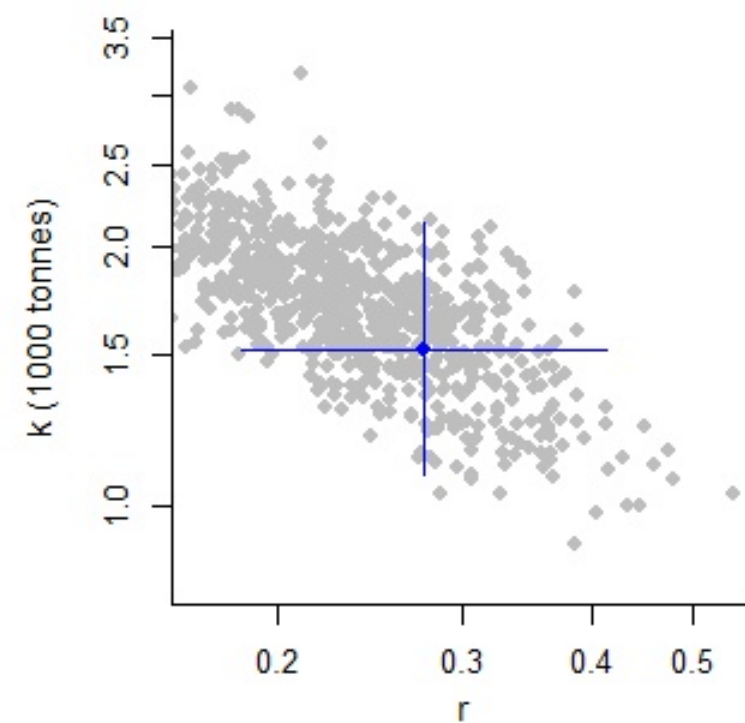

**D: Stock size**

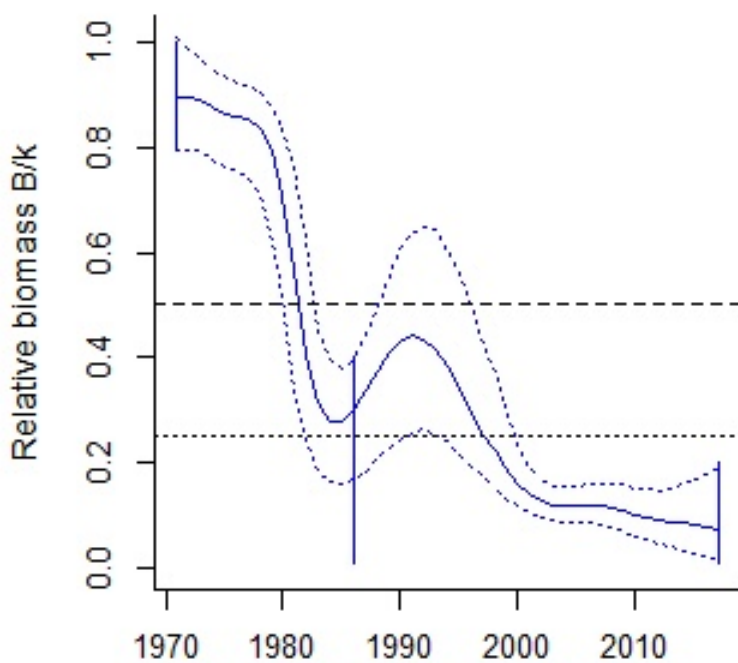

**E: Exploitation rate**

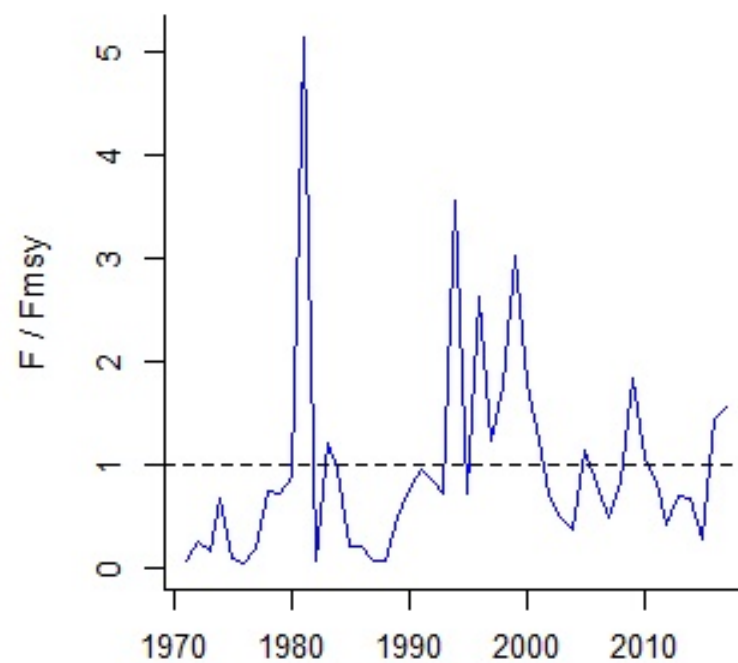

**F: Equilibrium curve**

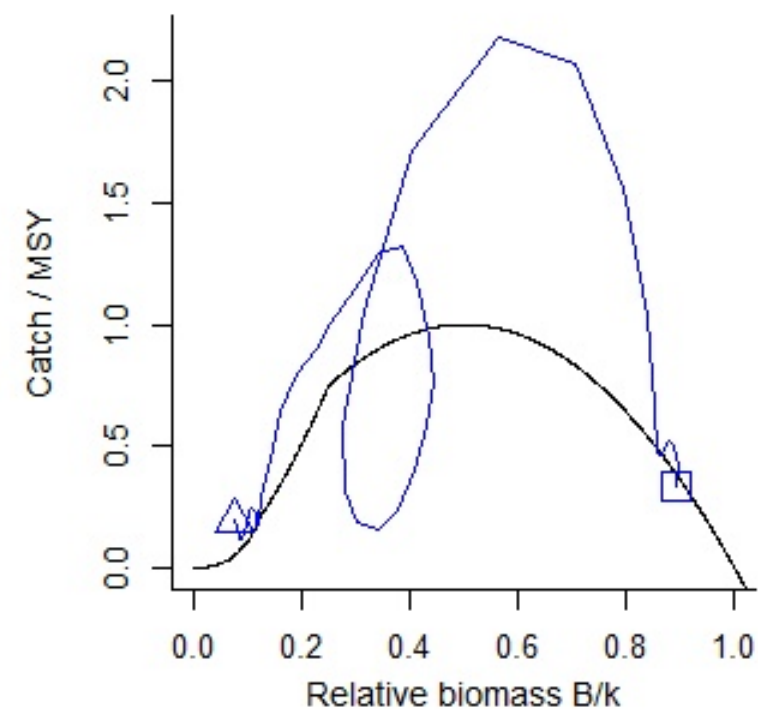



**Catch**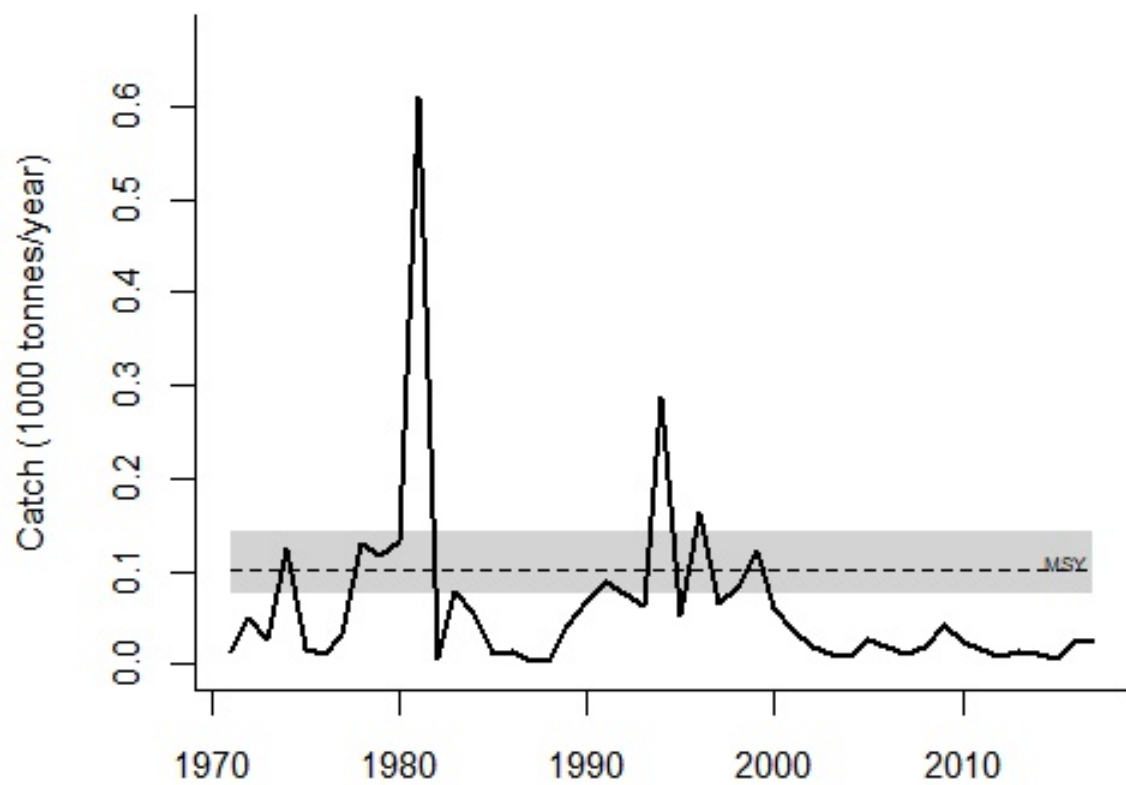**Stock size**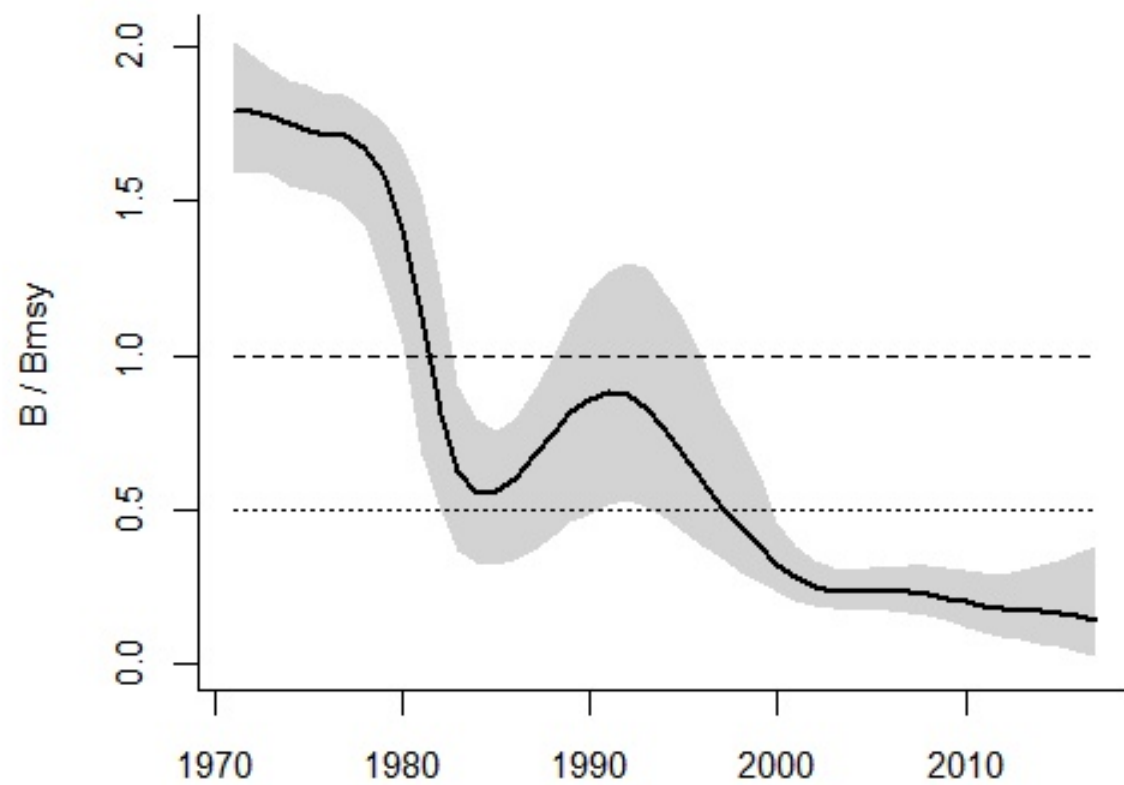**Exploitation**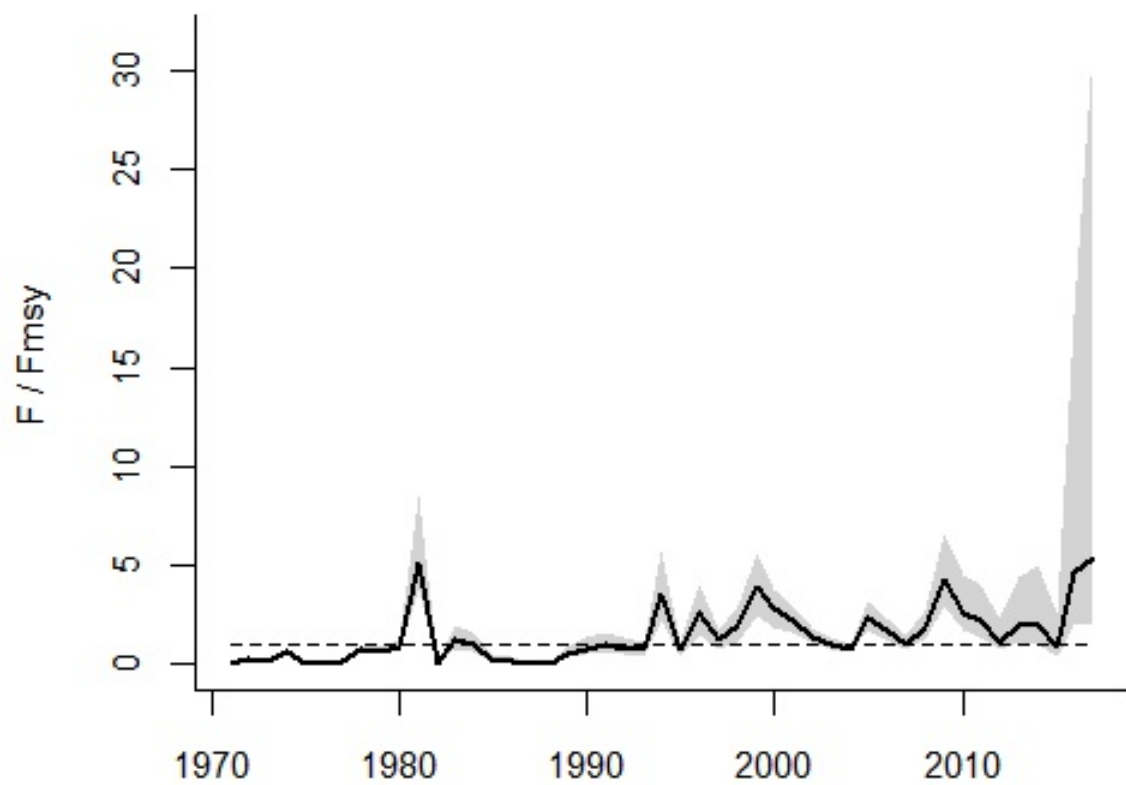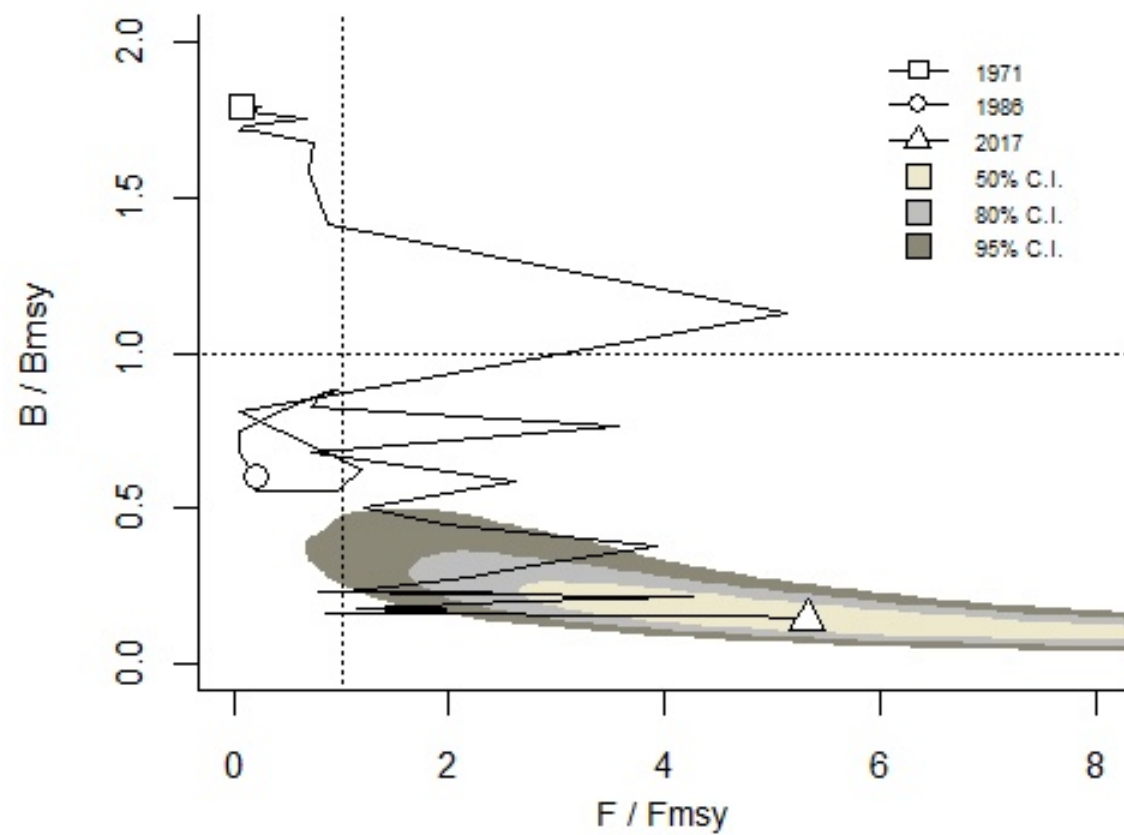

**A: Catch Saddled\_Med**

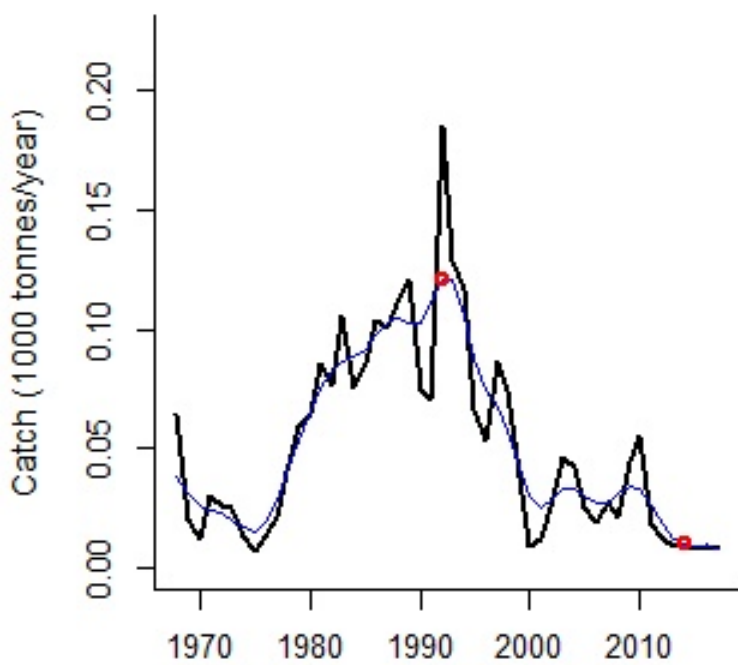

**B: Finding viable r-k**

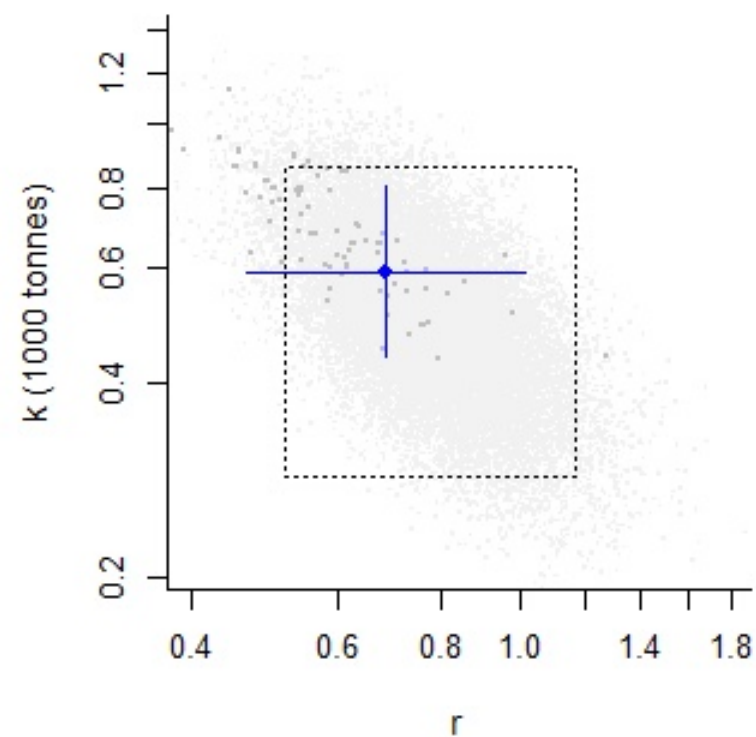

**C: Analysis of viable r-k**

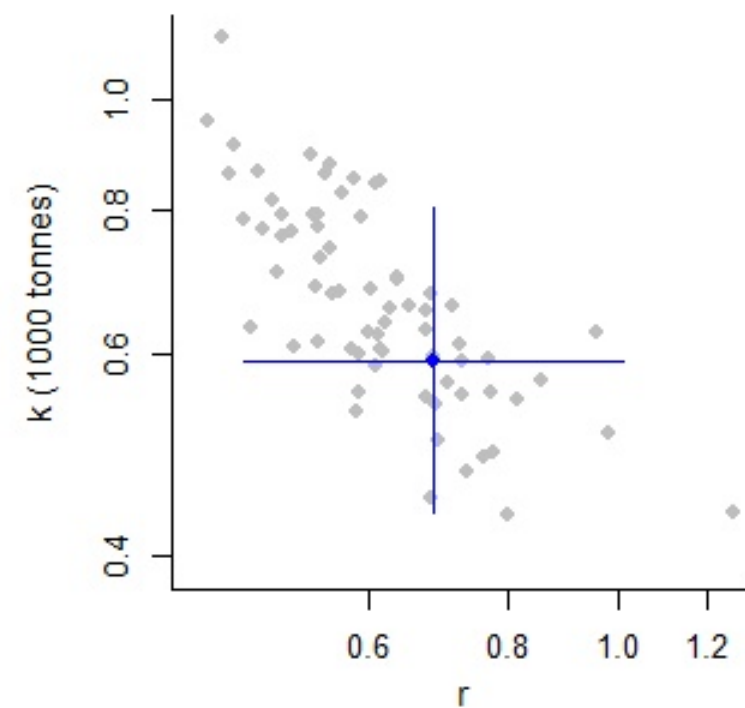

**D: Stock size**

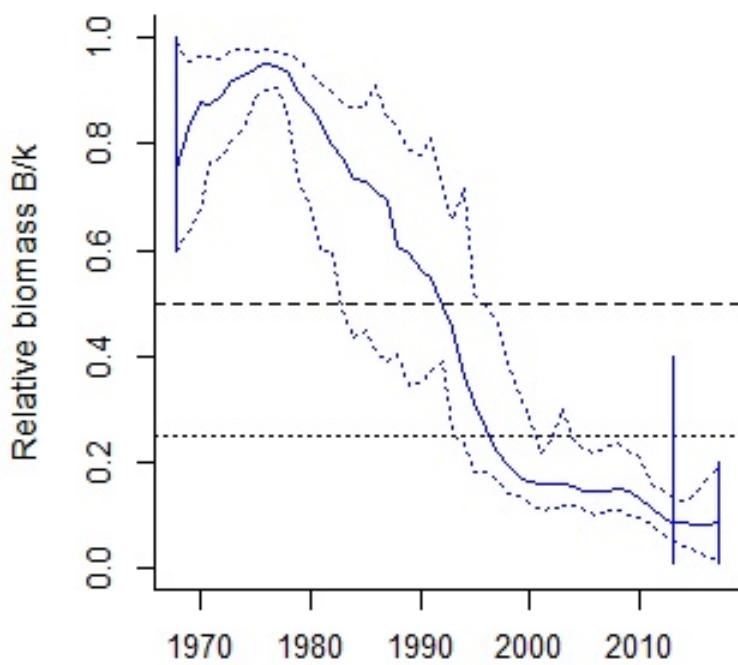

**E: Exploitation rate**

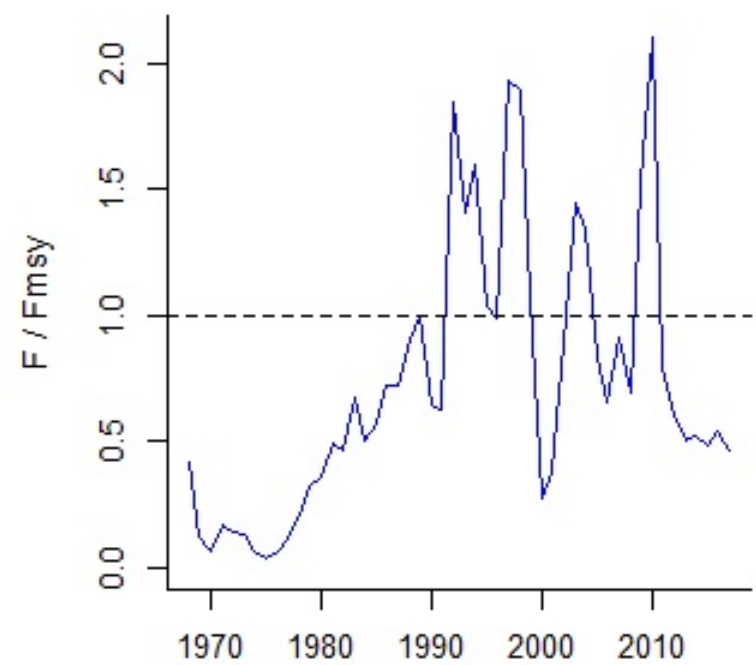

**F: Equilibrium curve**

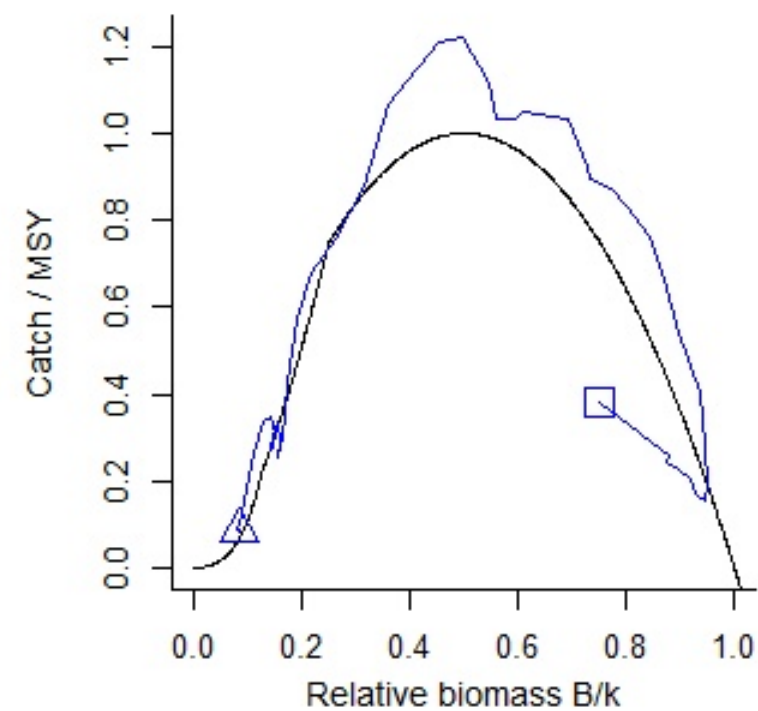

**Catch**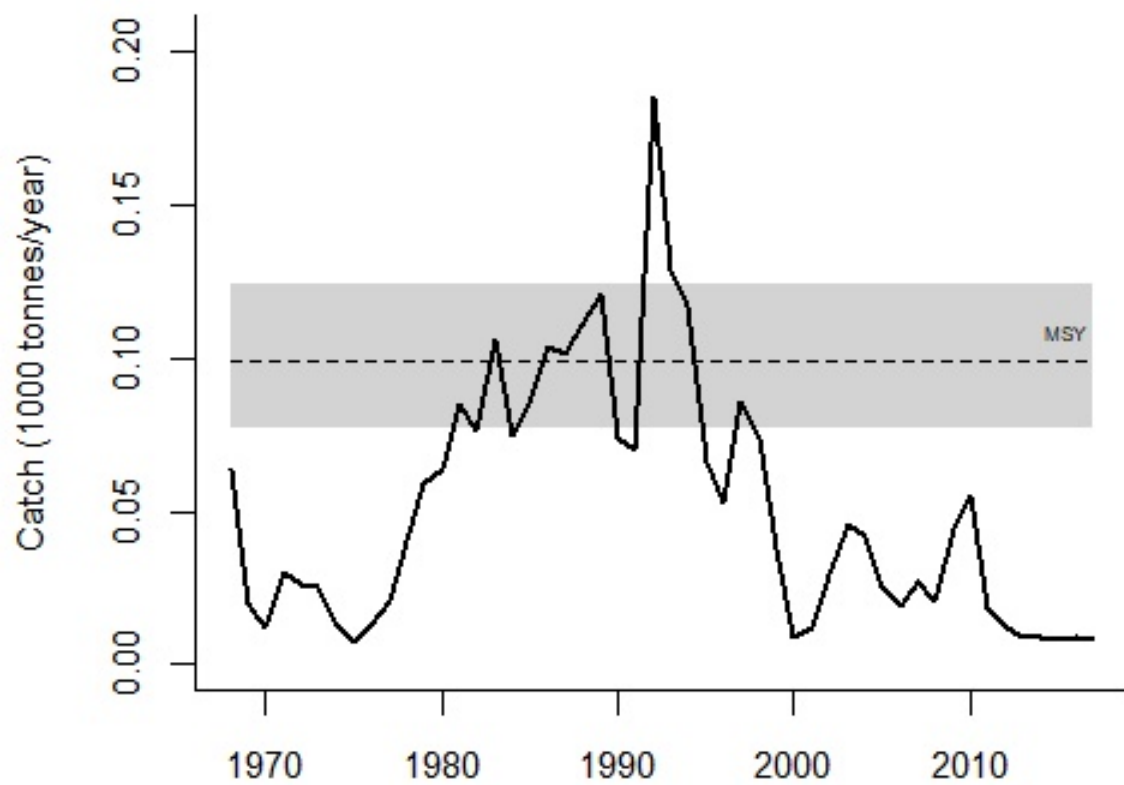**Stock size**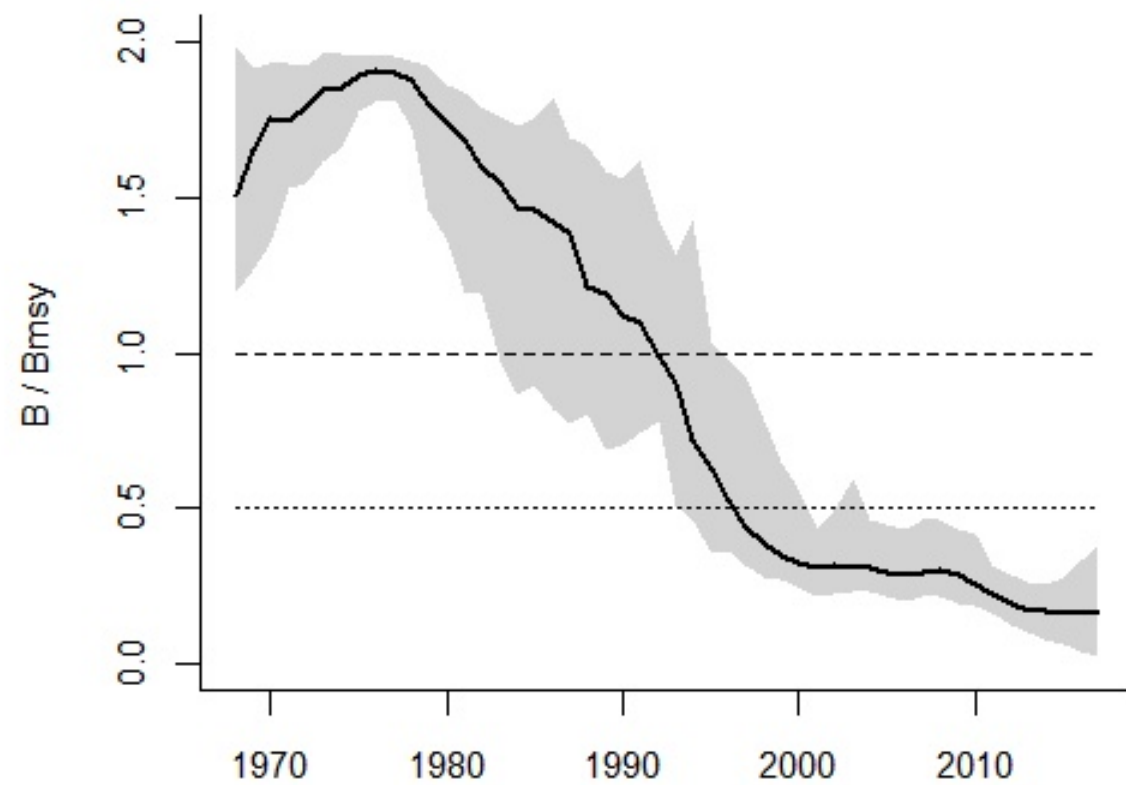**Exploitation**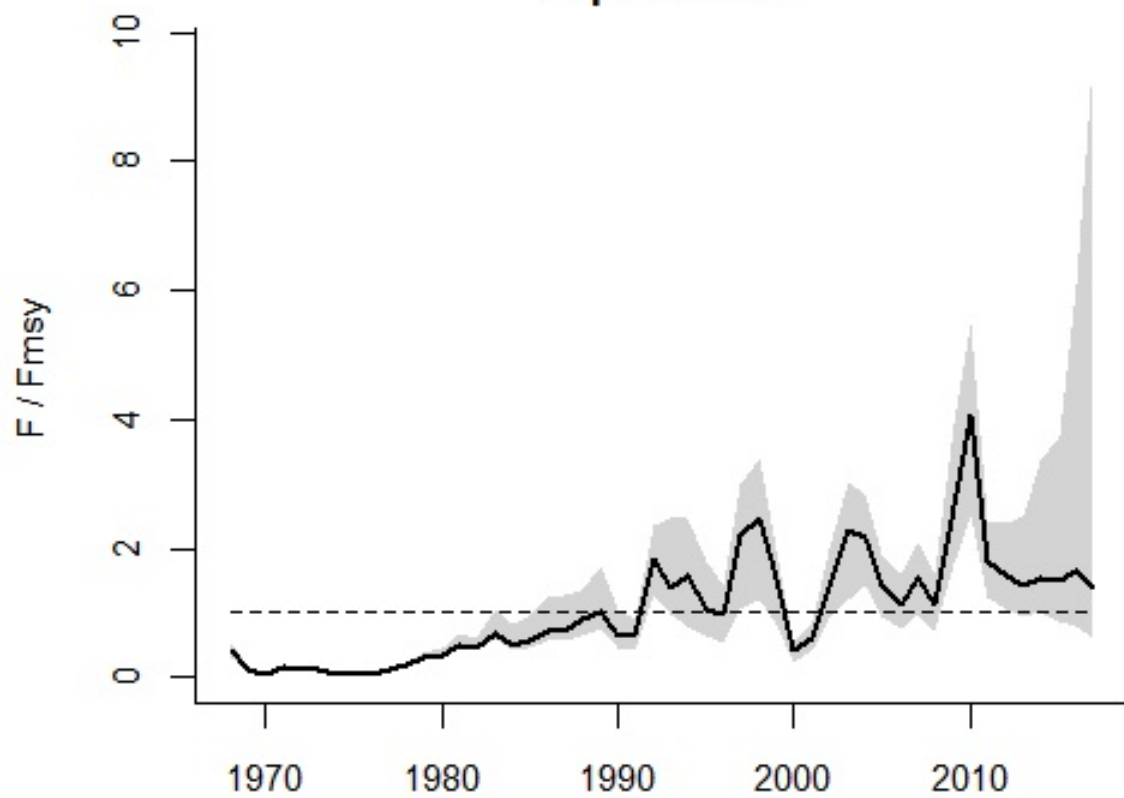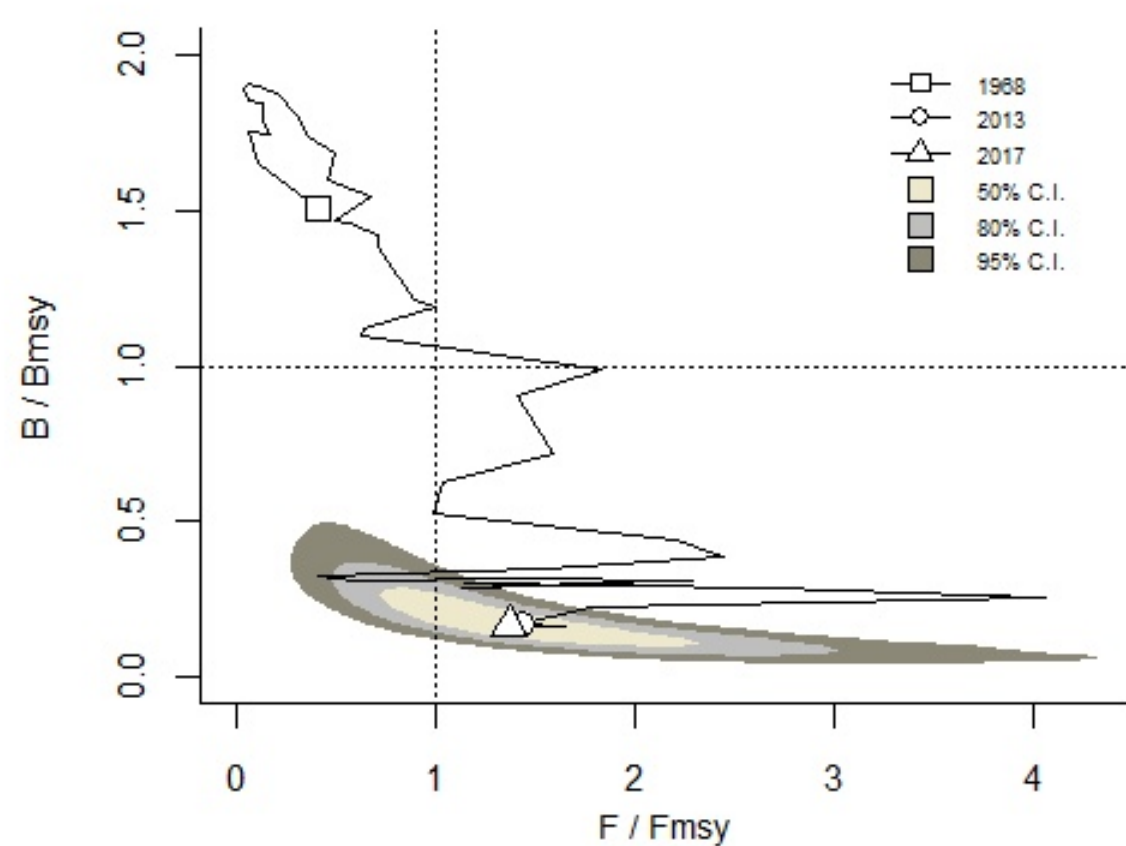

**A: Catch Seabream\_Med**

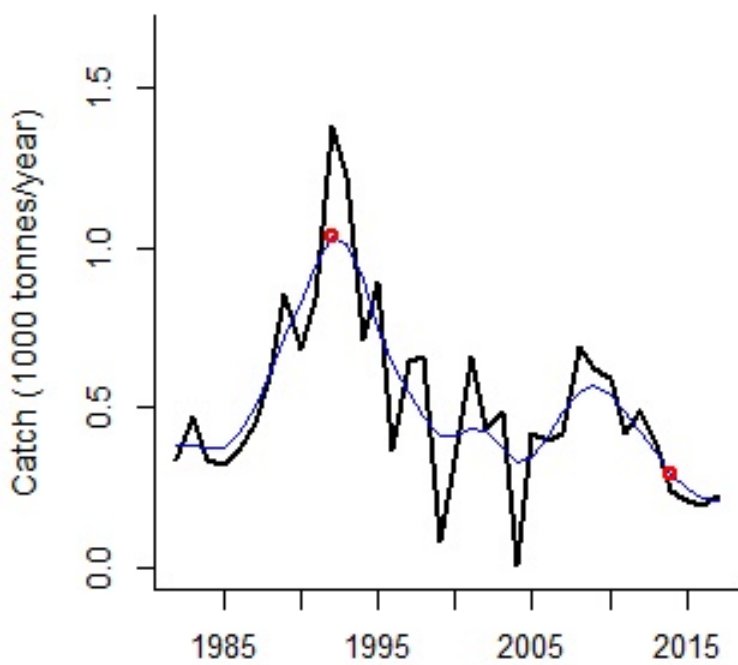

**B: Finding viable r-k**

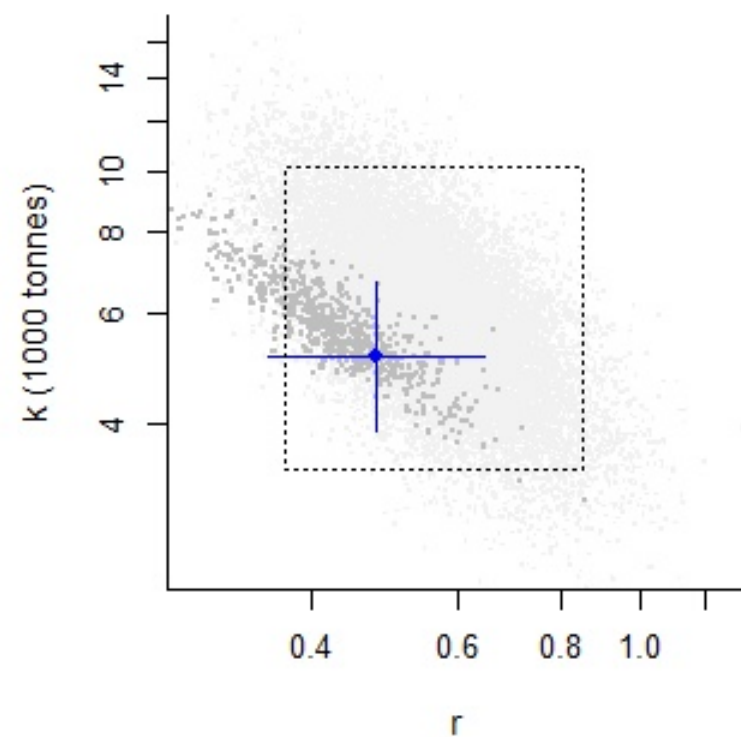

**C: Analysis of viable r-k**

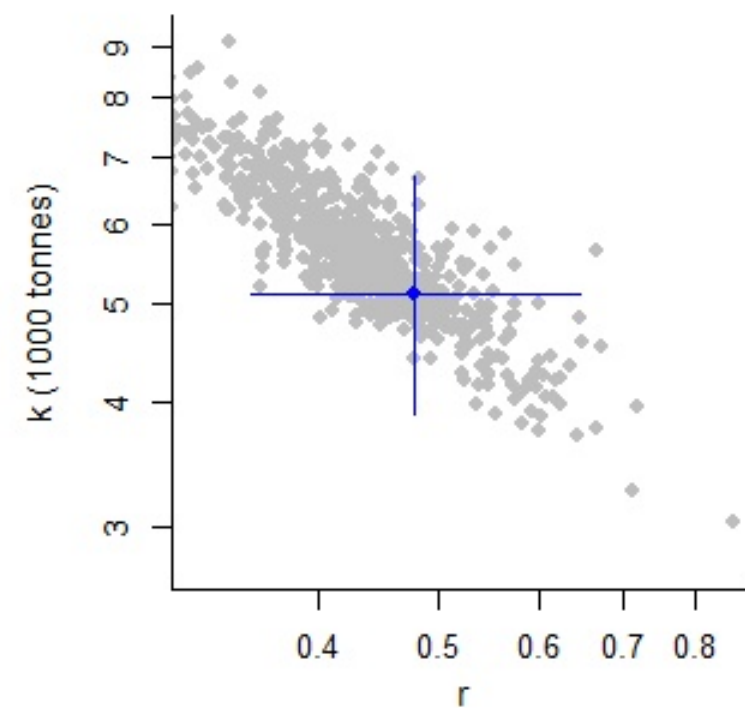

**D: Stock size**

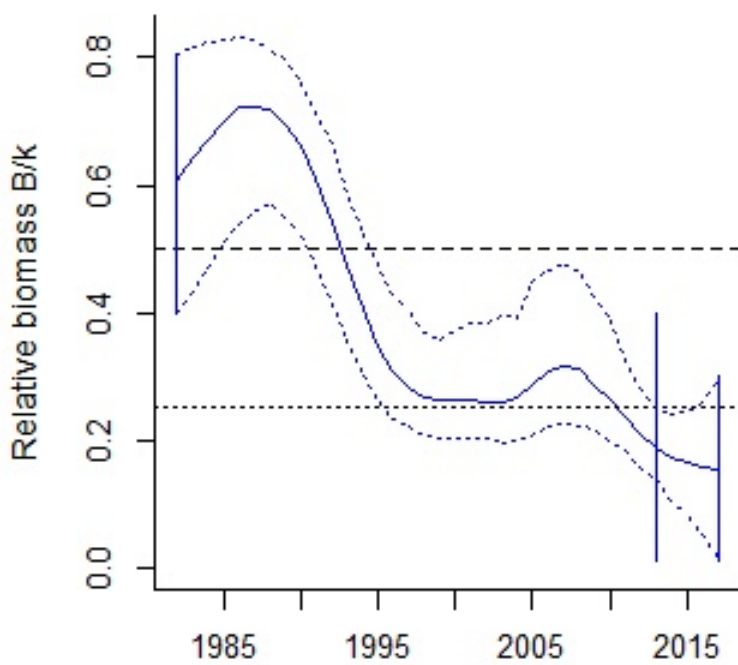

**E: Exploitation rate**

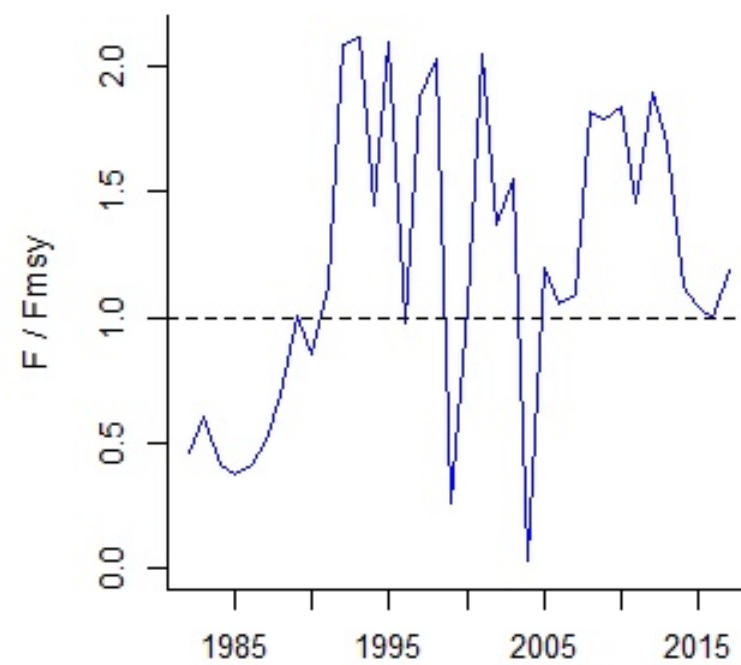

**F: Equilibrium curve**

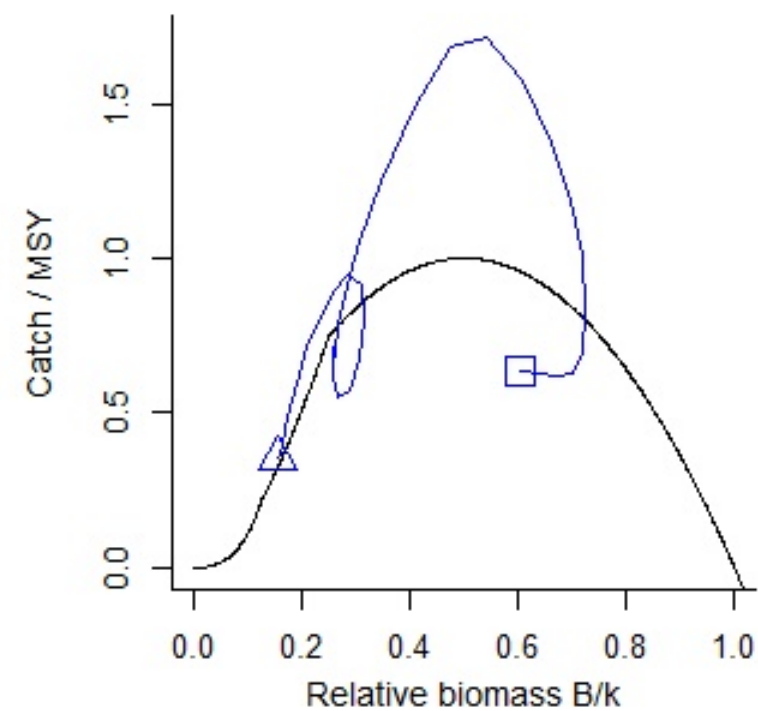



**Catch**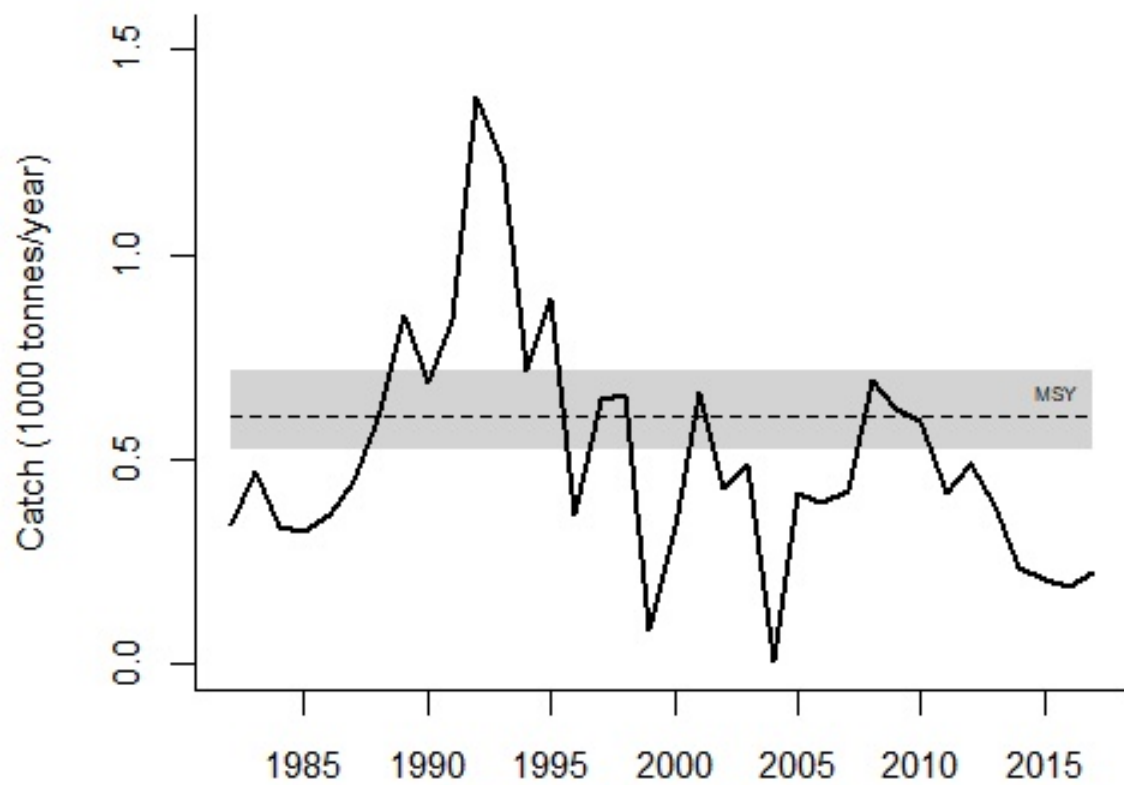**Stock size**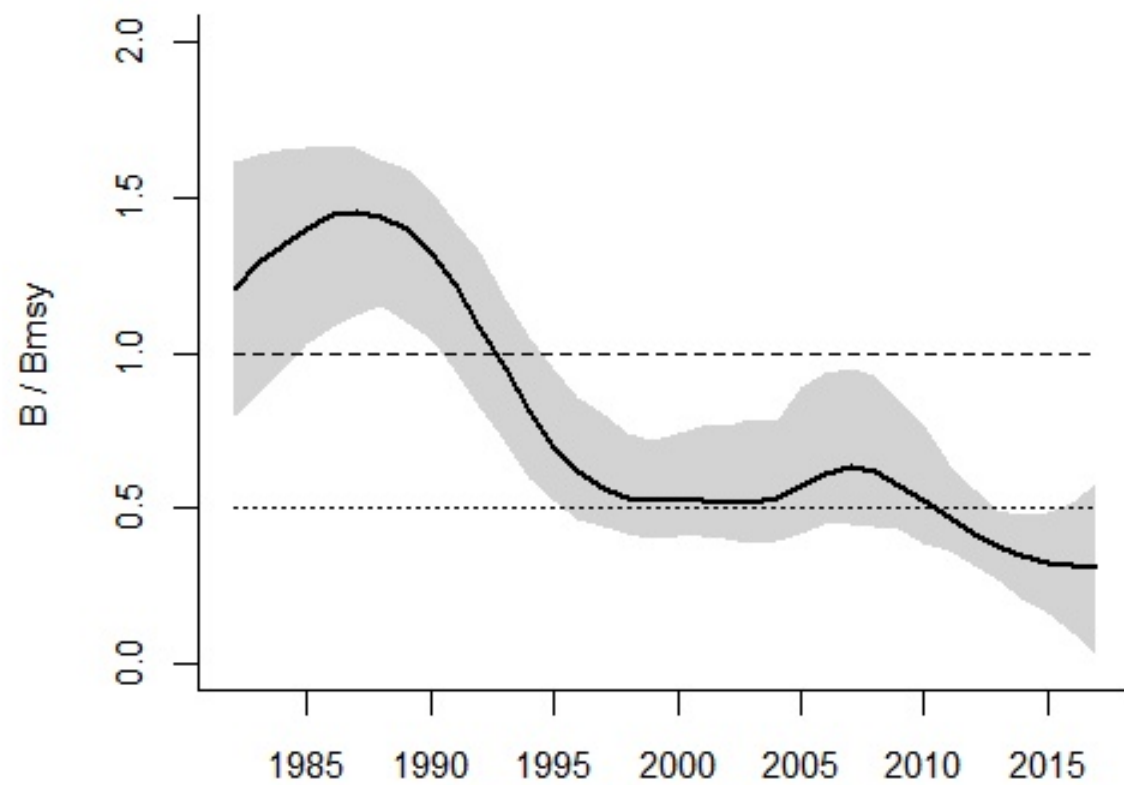**Exploitation**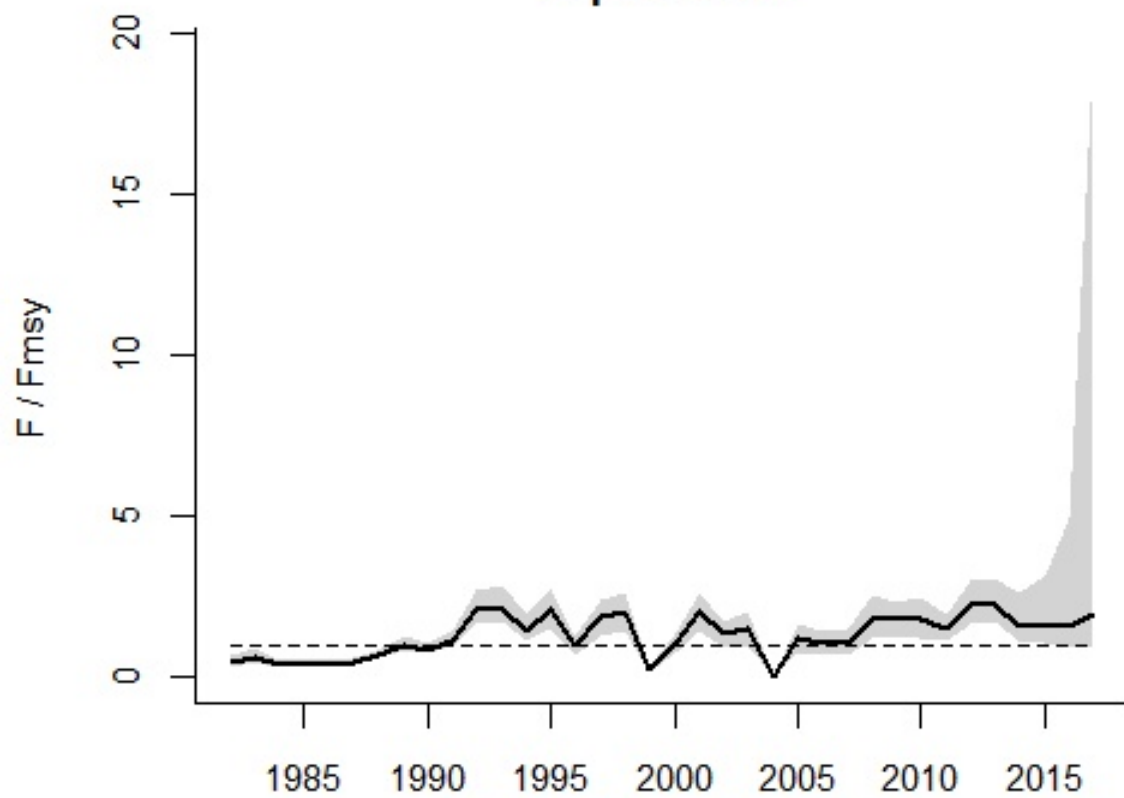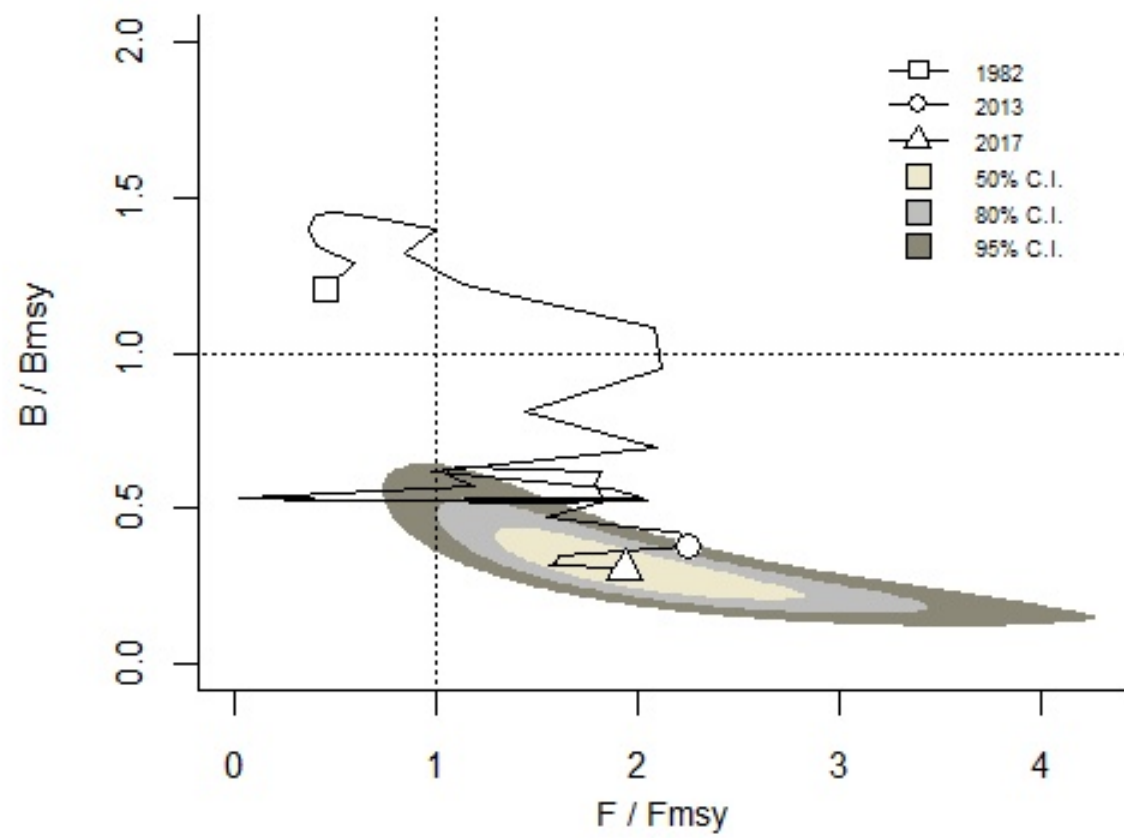

**A: Catch Dogfish\_Med**

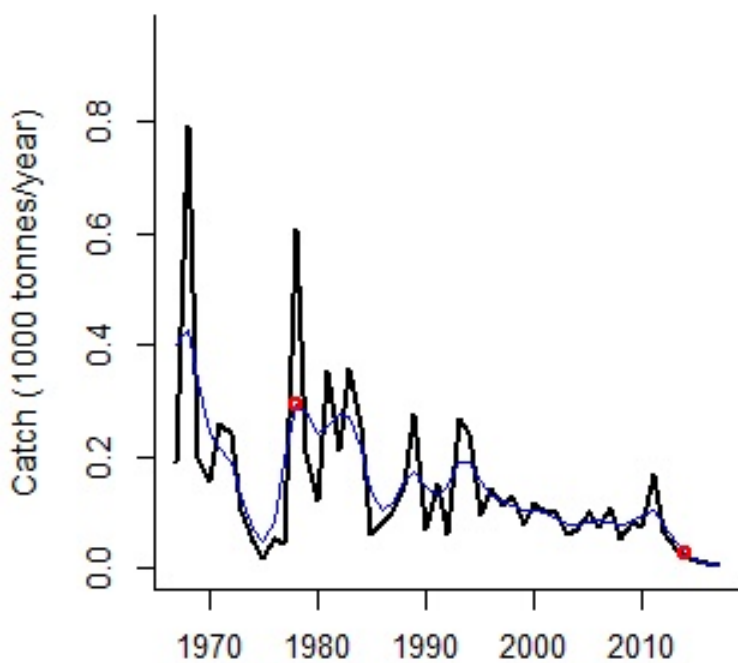

**B: Finding viable r-k**

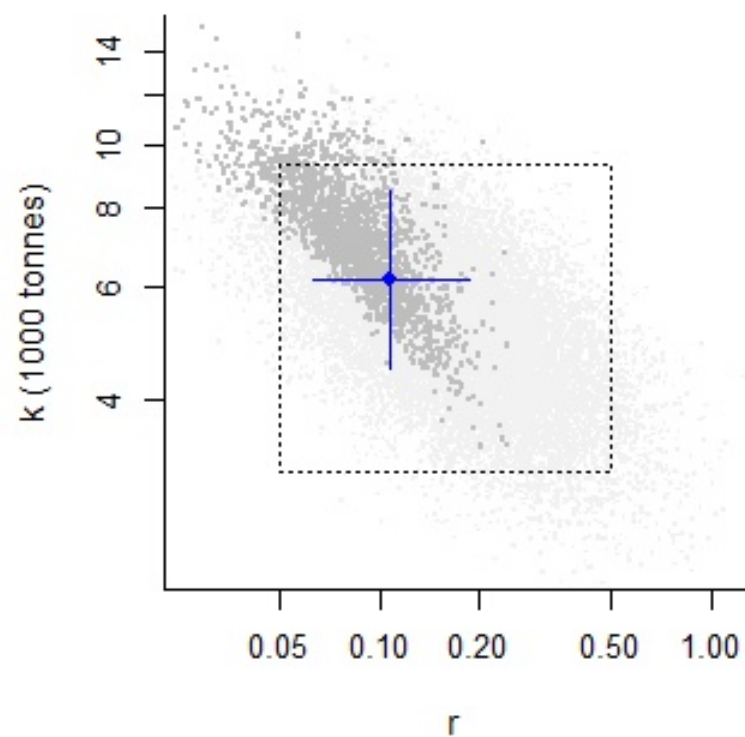

**C: Analysis of viable r-k**

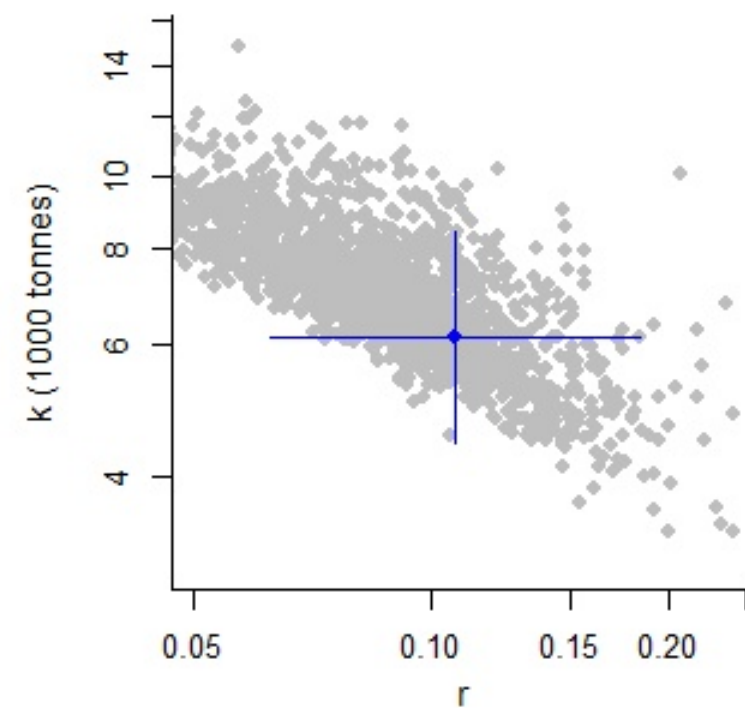

**D: Stock size**

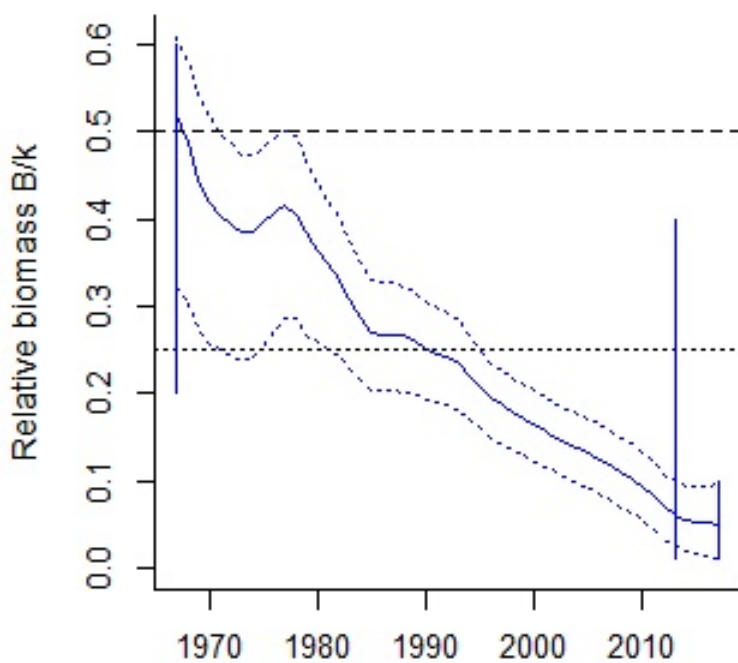

**E: Exploitation rate**

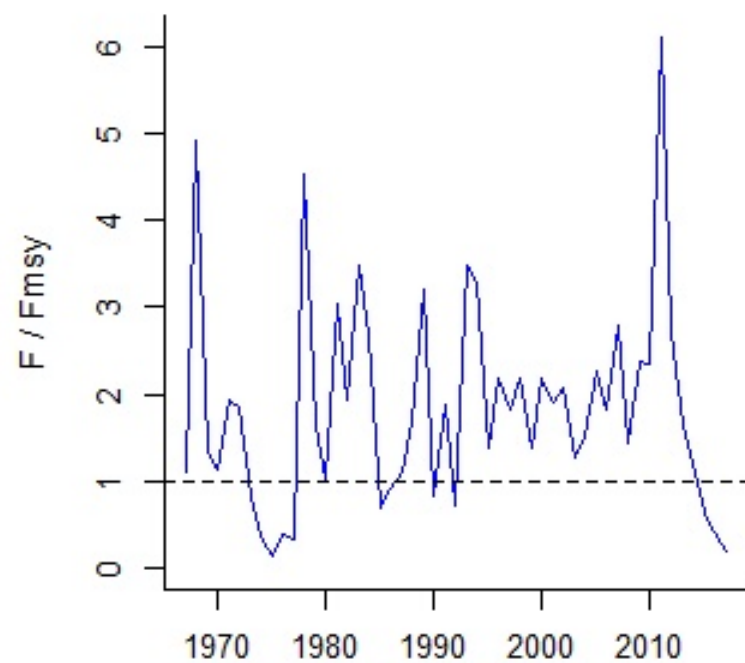

**F: Equilibrium curve**

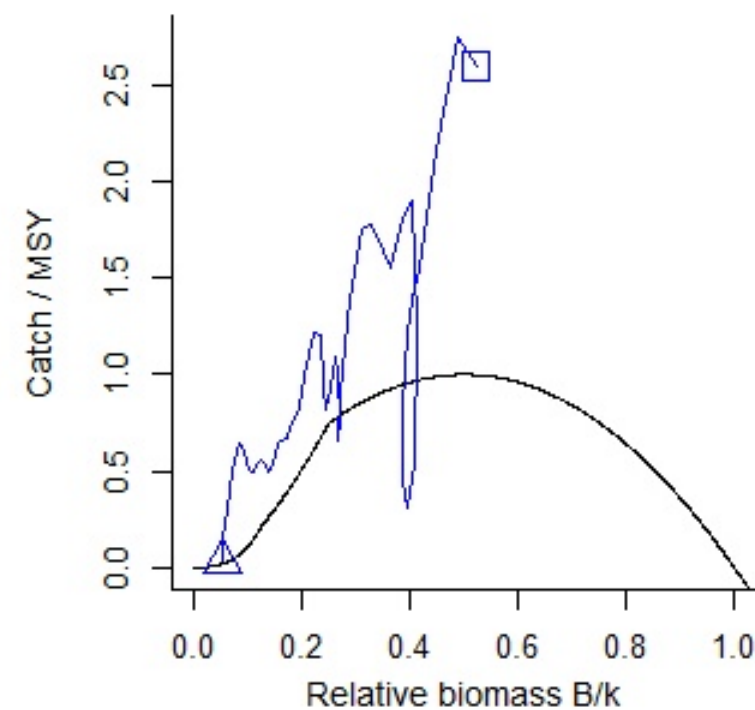

**Catch**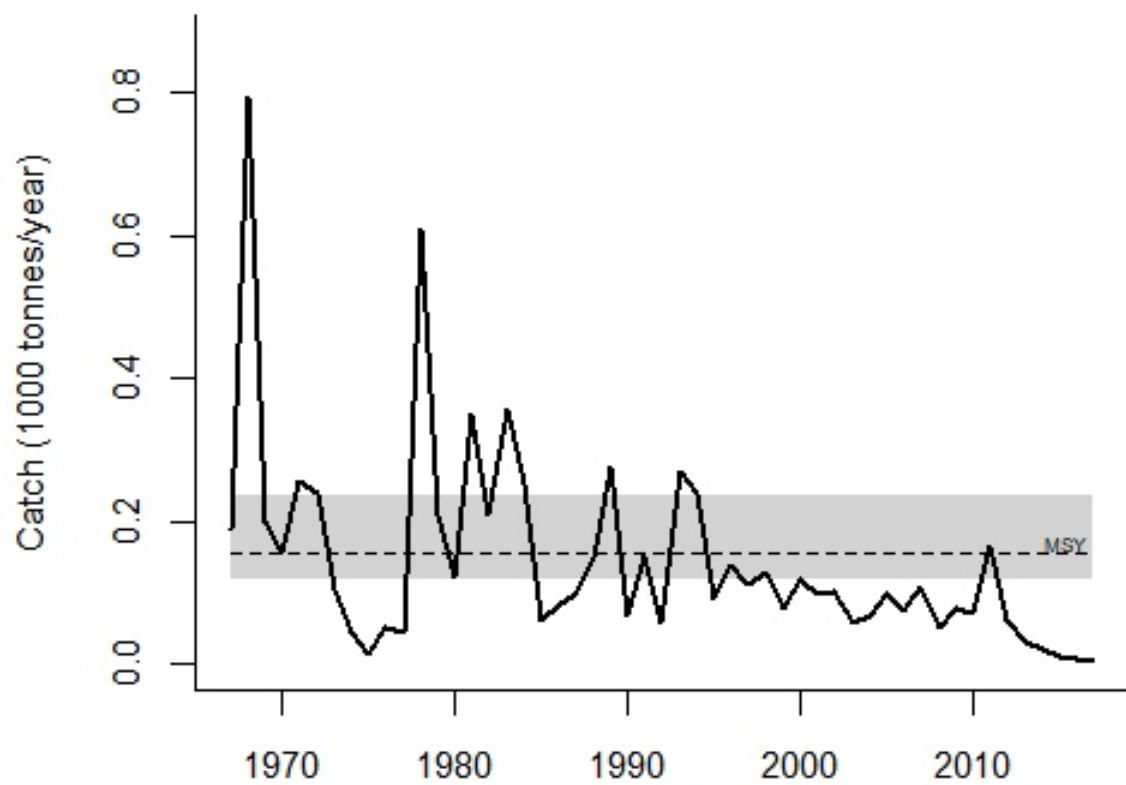**Stock size**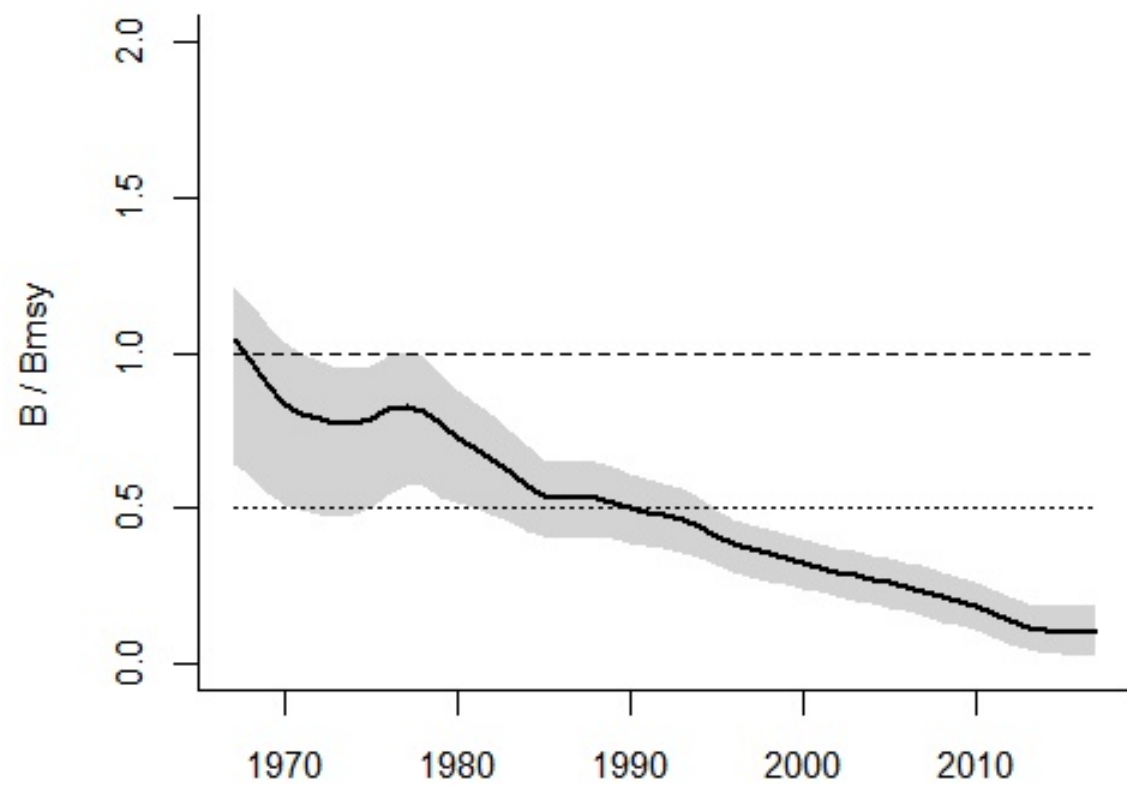**Exploitation**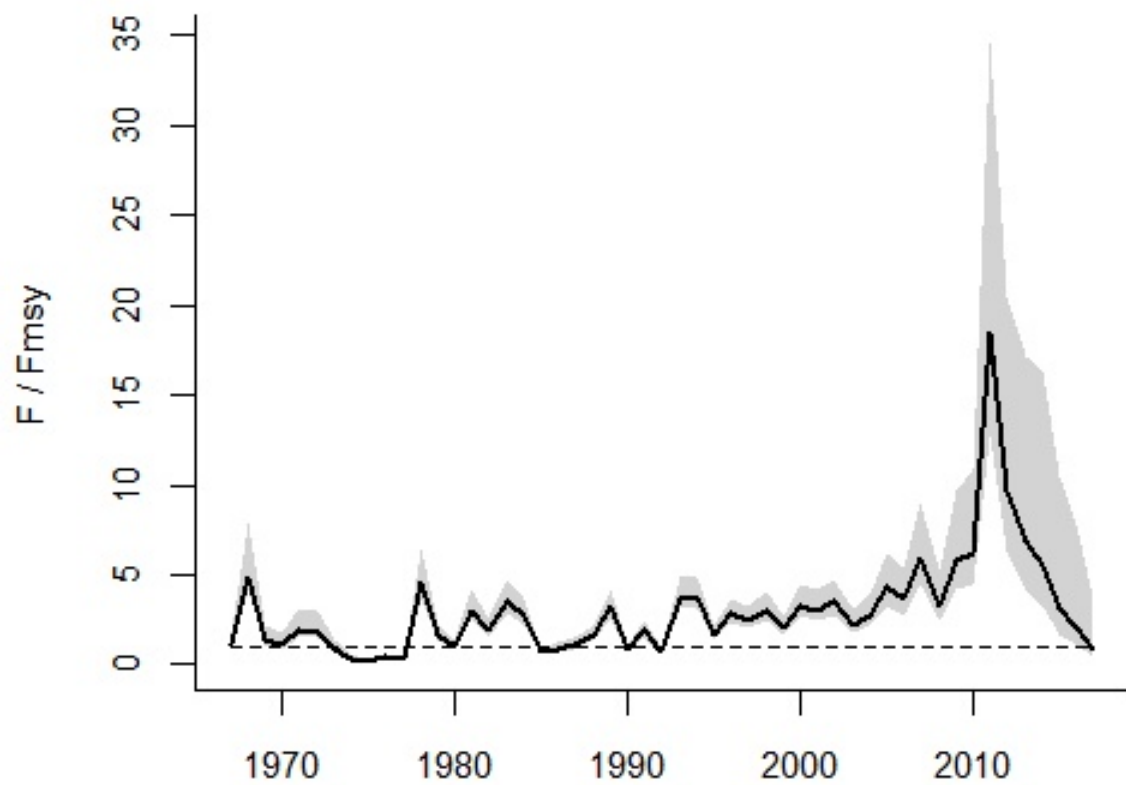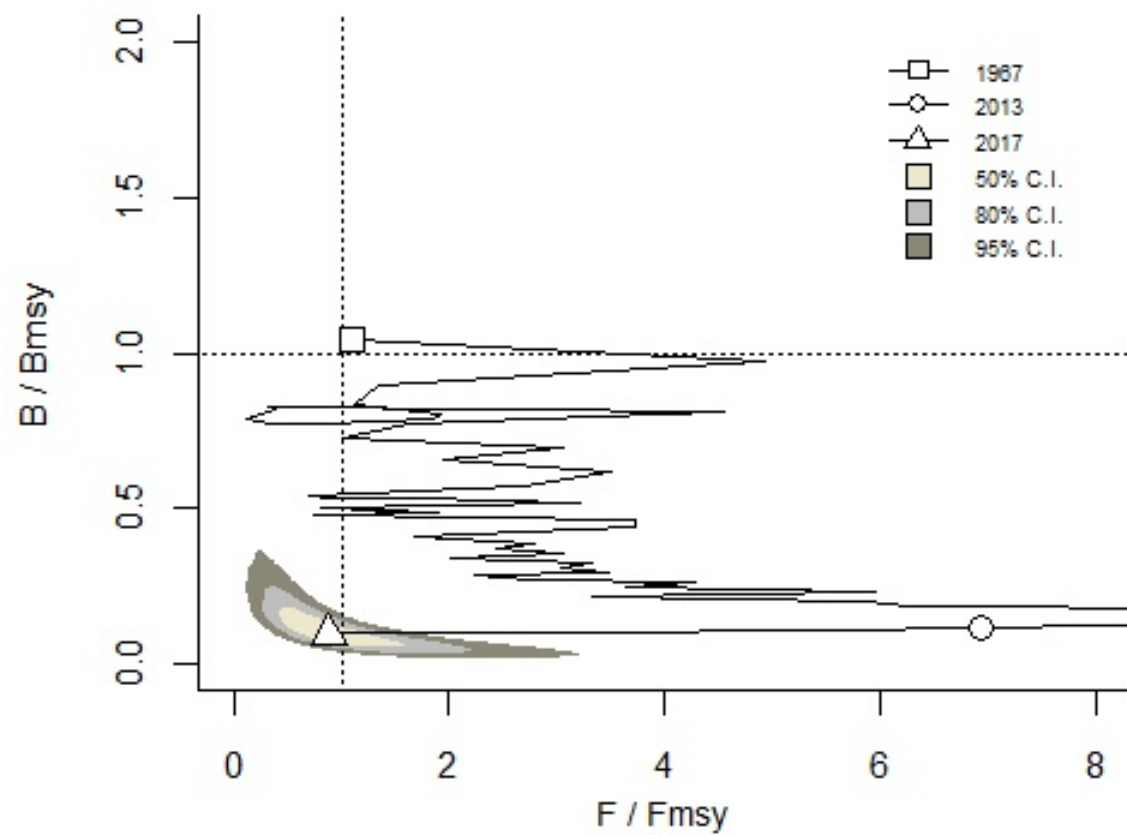

**A: Catch Octopus\_Med**

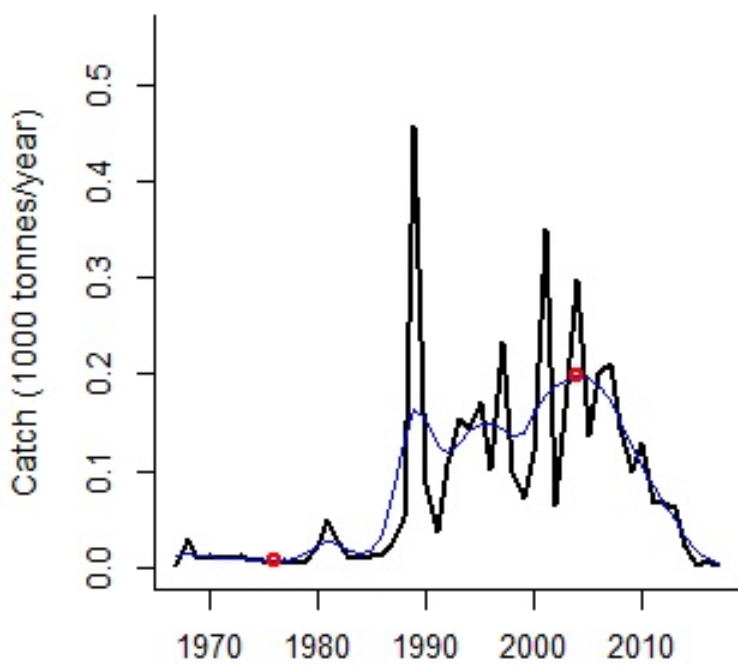

**B: Finding viable r-k**

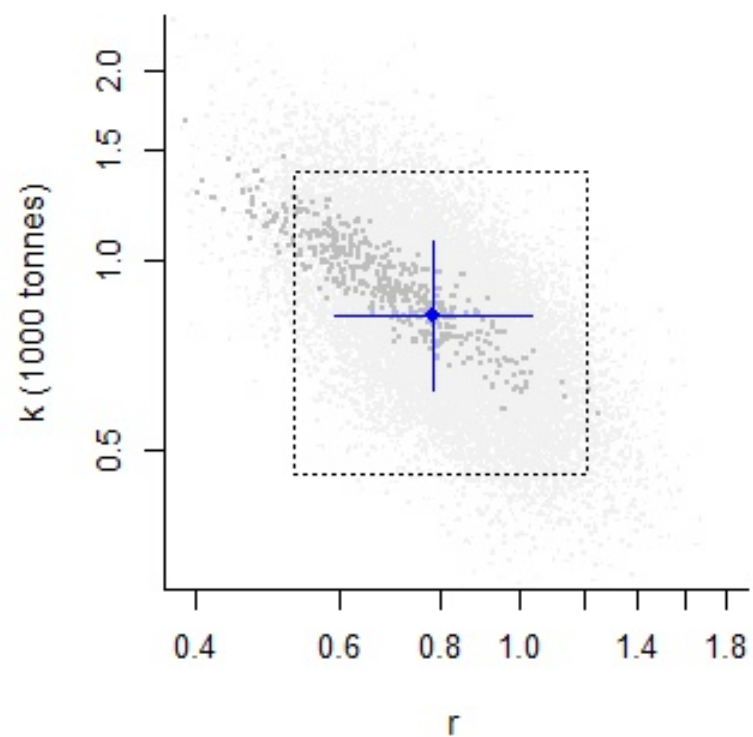

**C: Analysis of viable r-k**

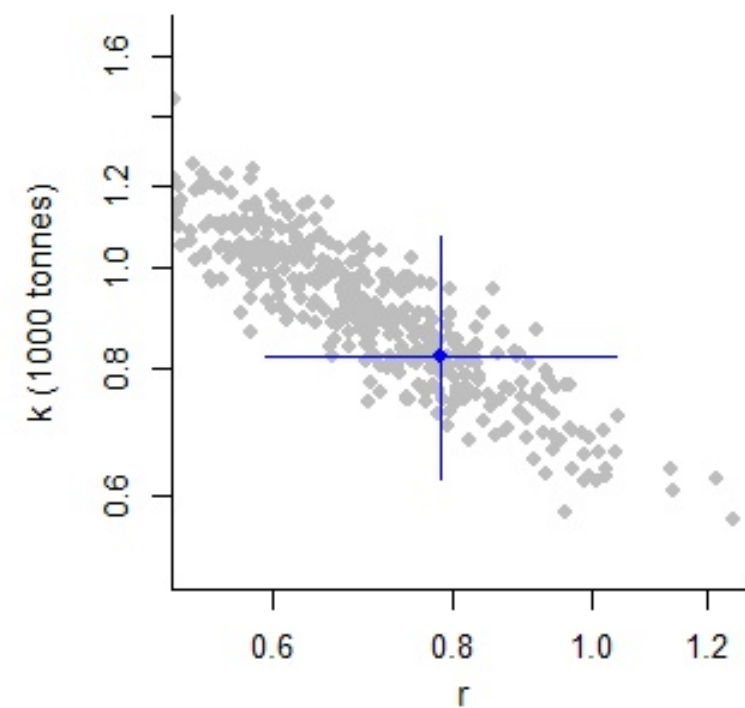

**D: Stock size**

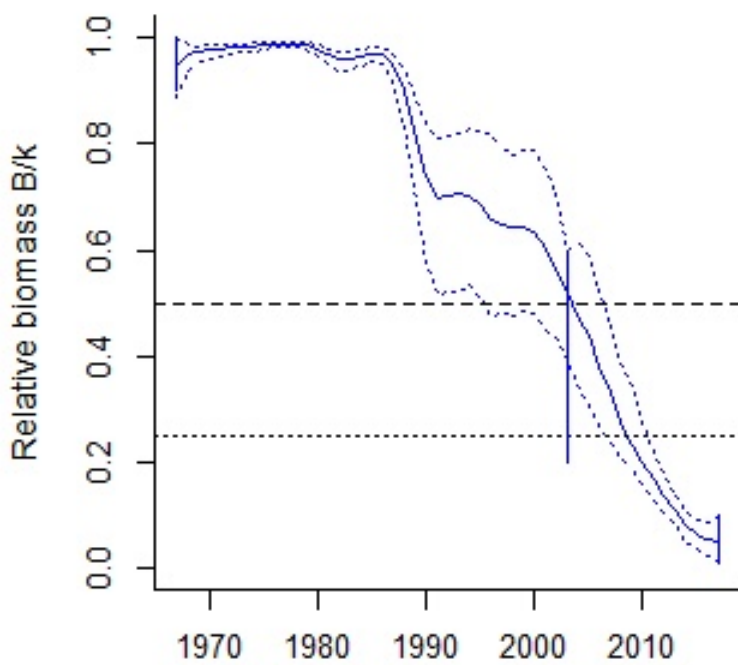

**E: Exploitation rate**

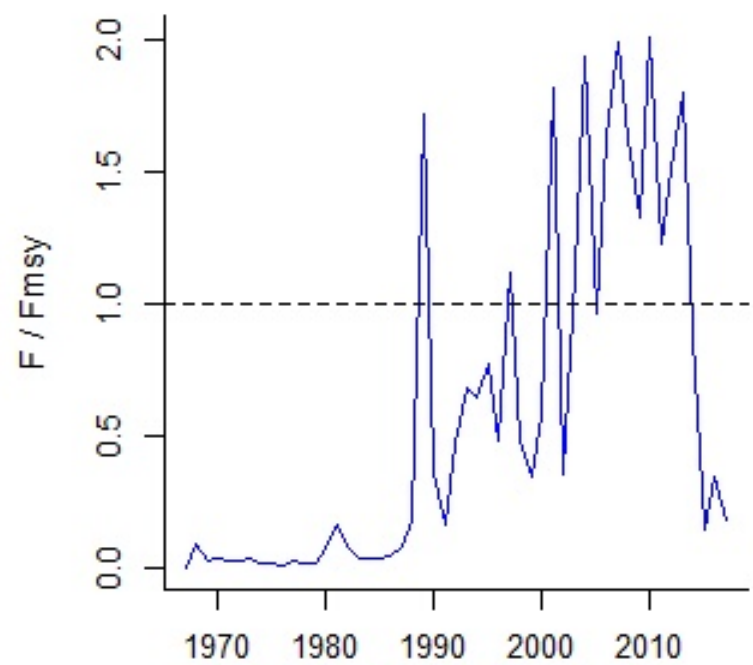

**F: Equilibrium curve**

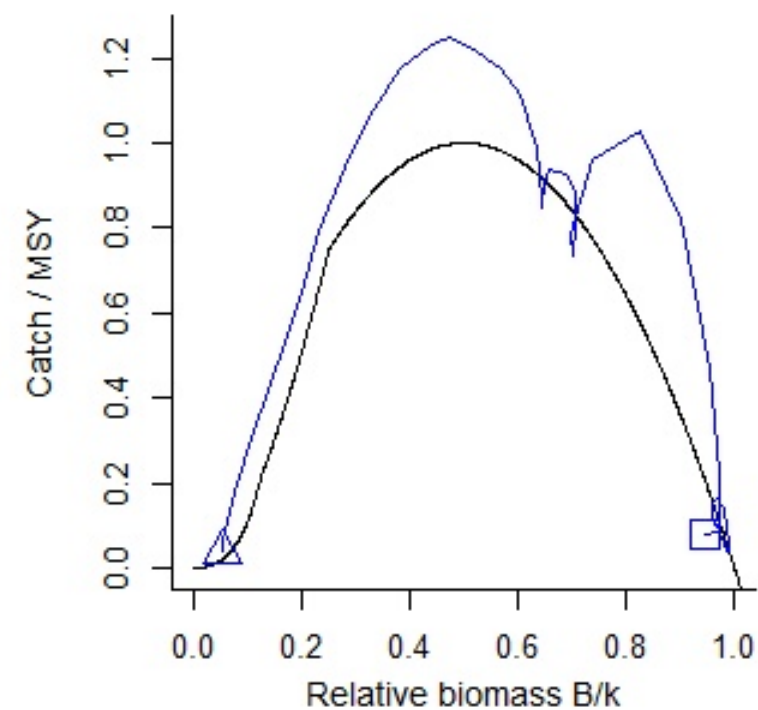



**Catch**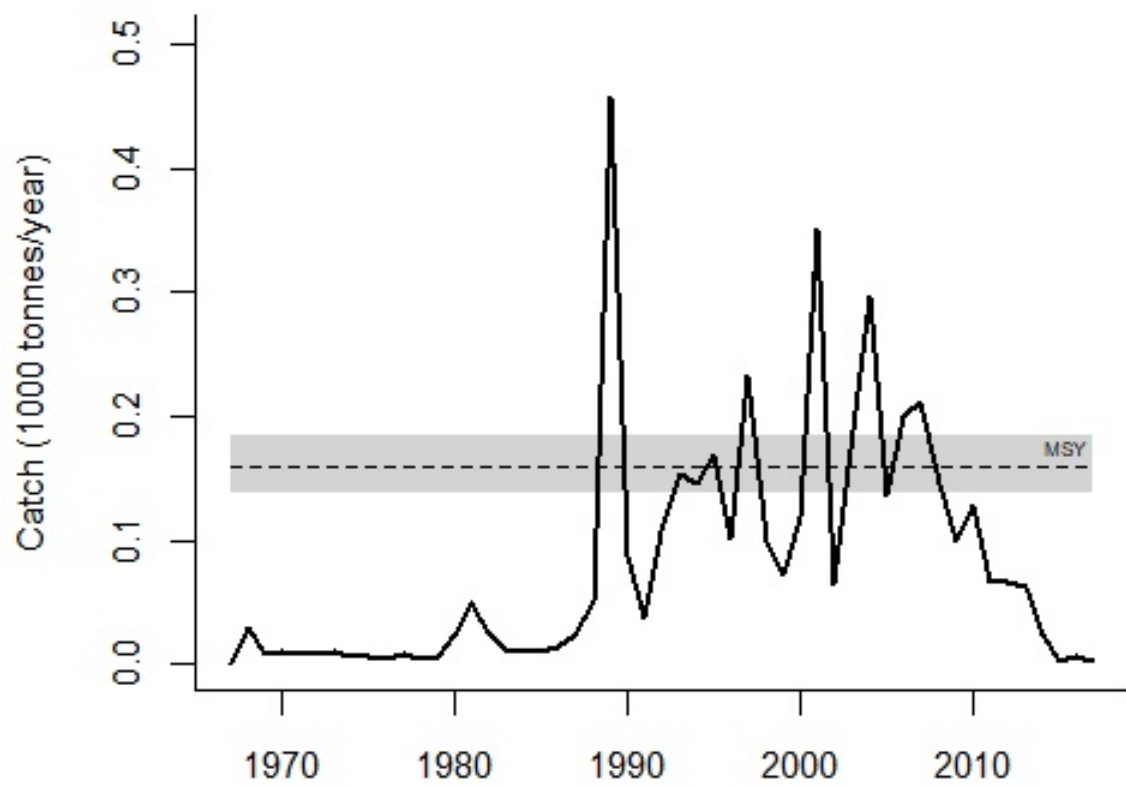**Stock size**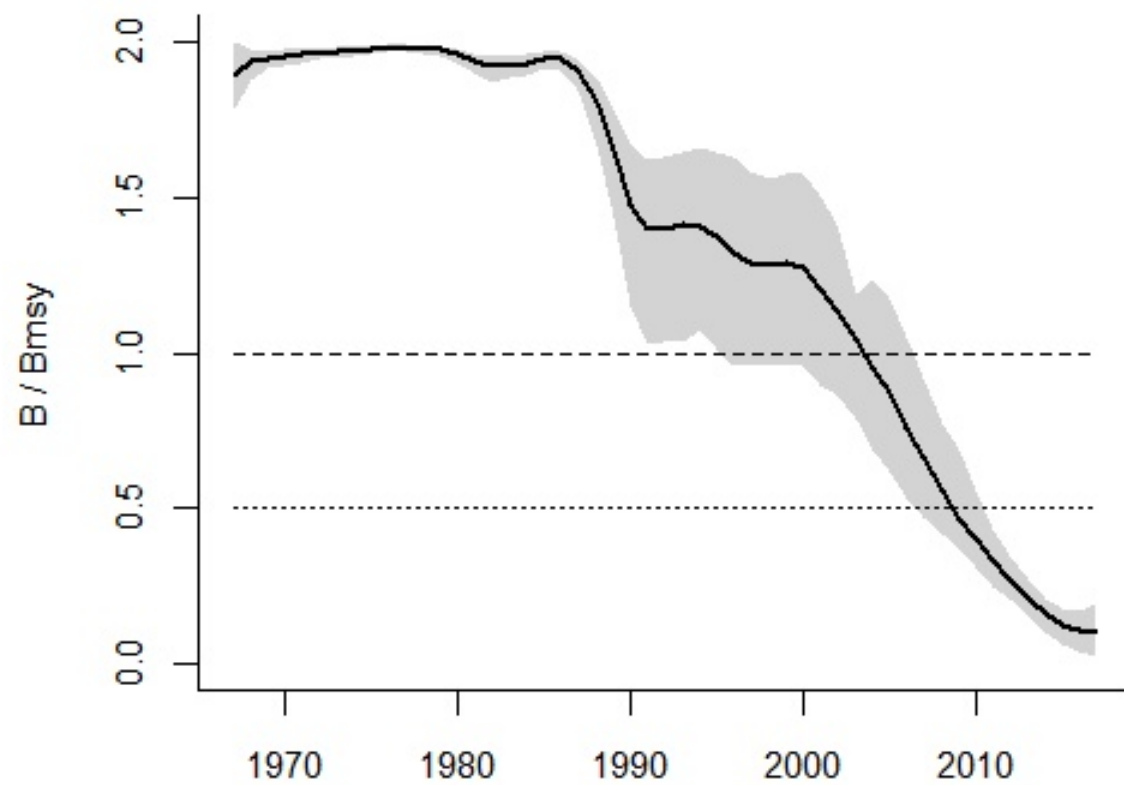**Exploitation**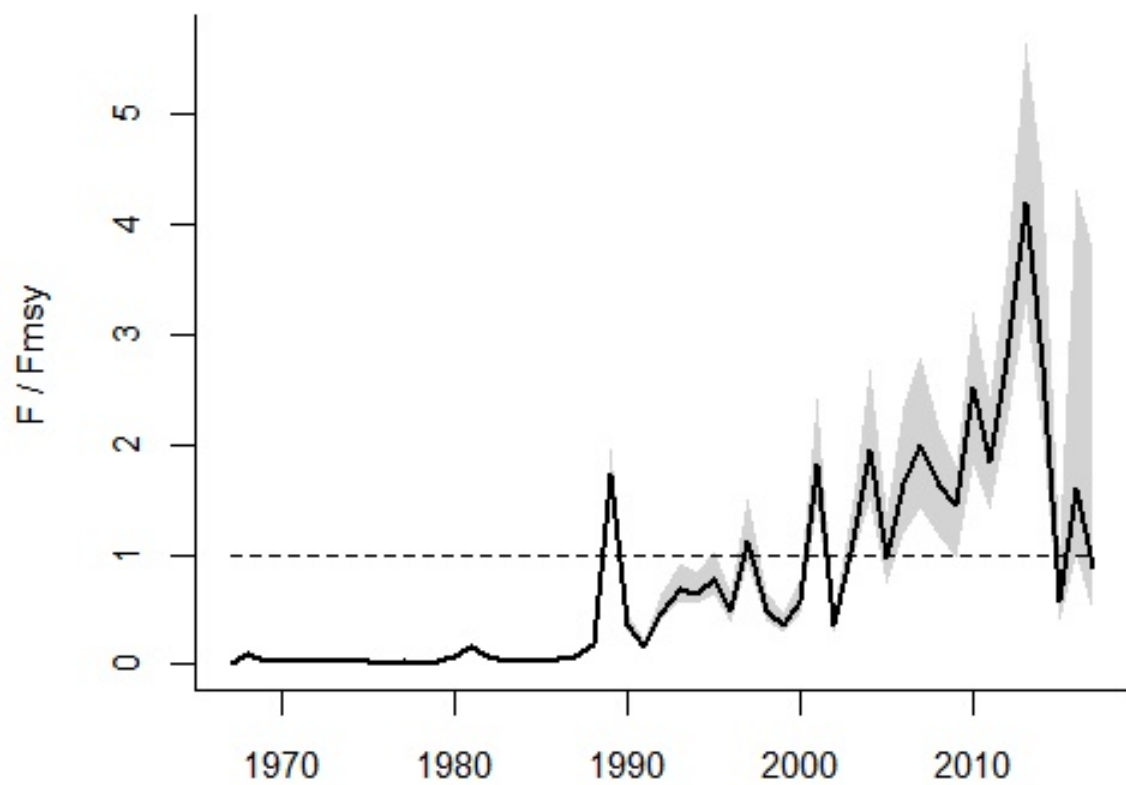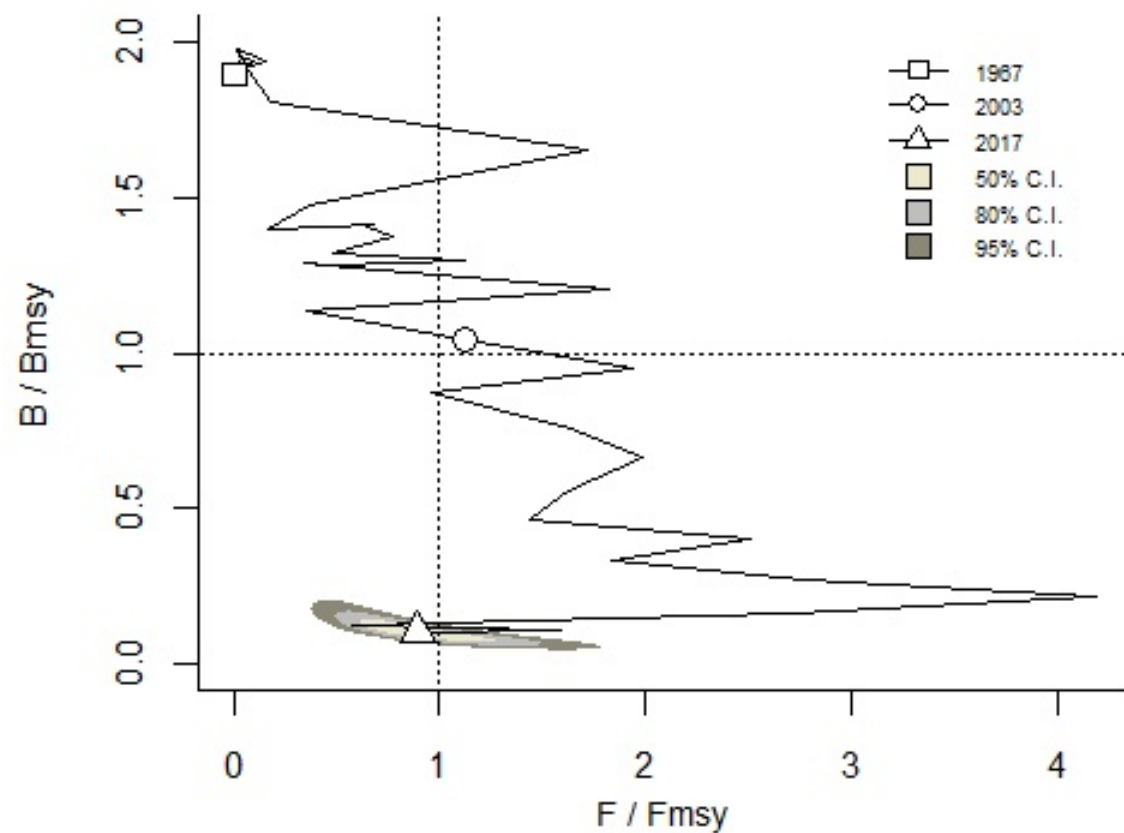

**A: Catch Cuttlefish\_Med**

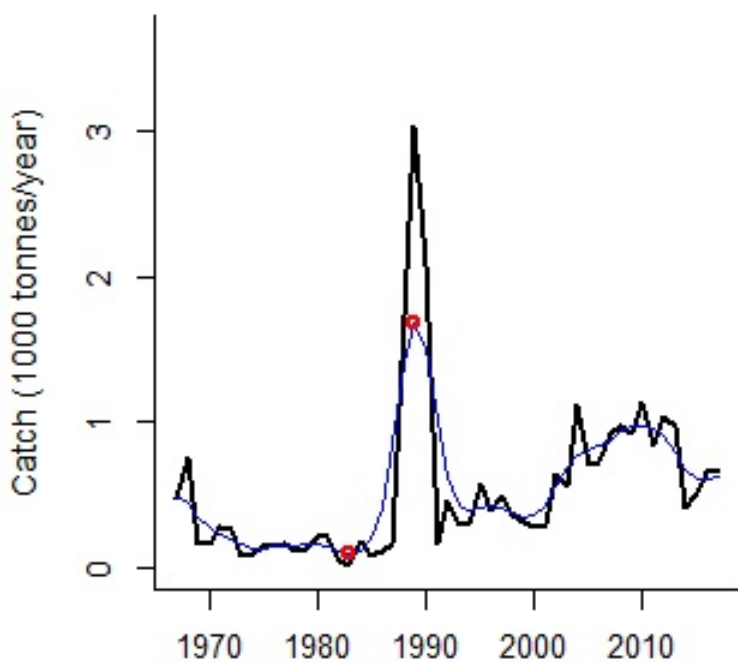

**B: Finding viable r-k**

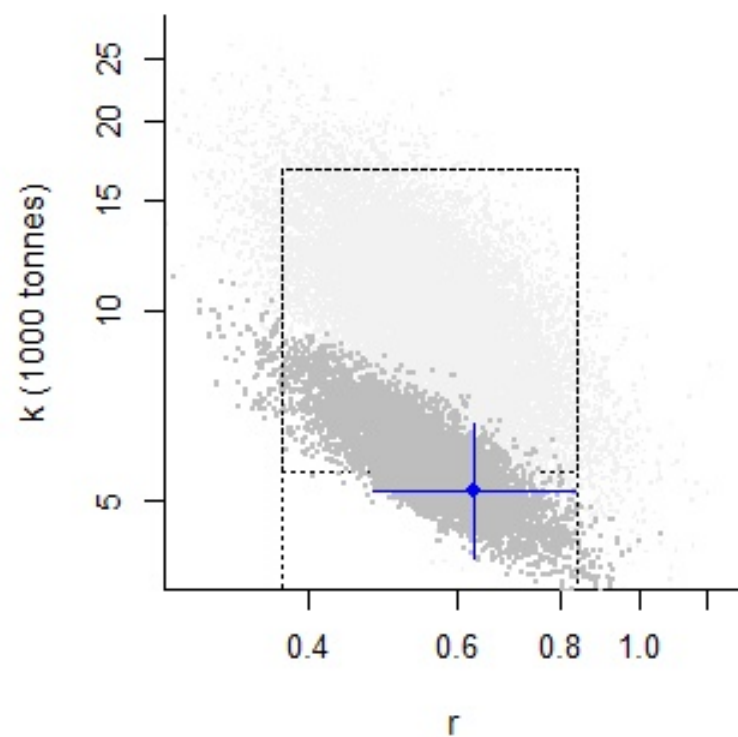

**C: Analysis of viable r-k**

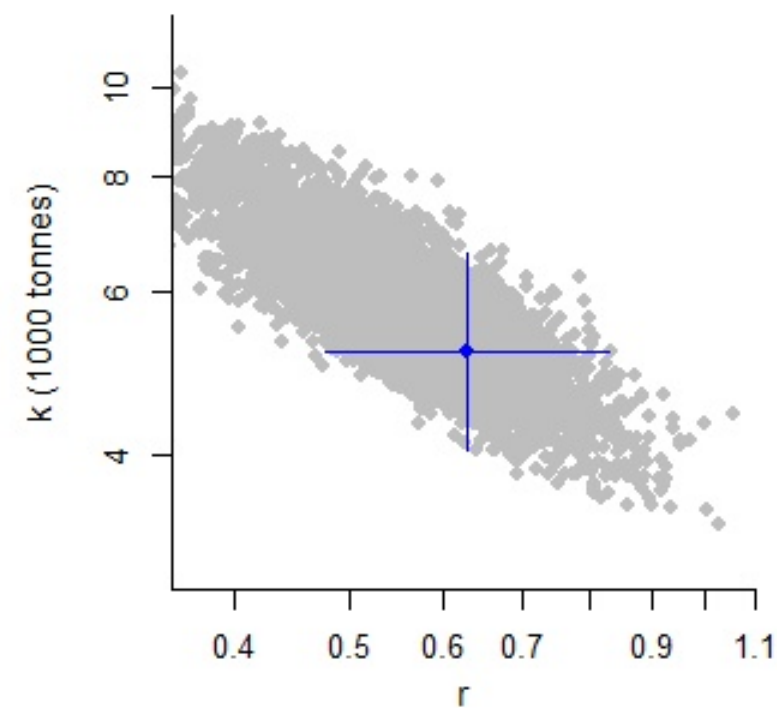

**D: Stock size**

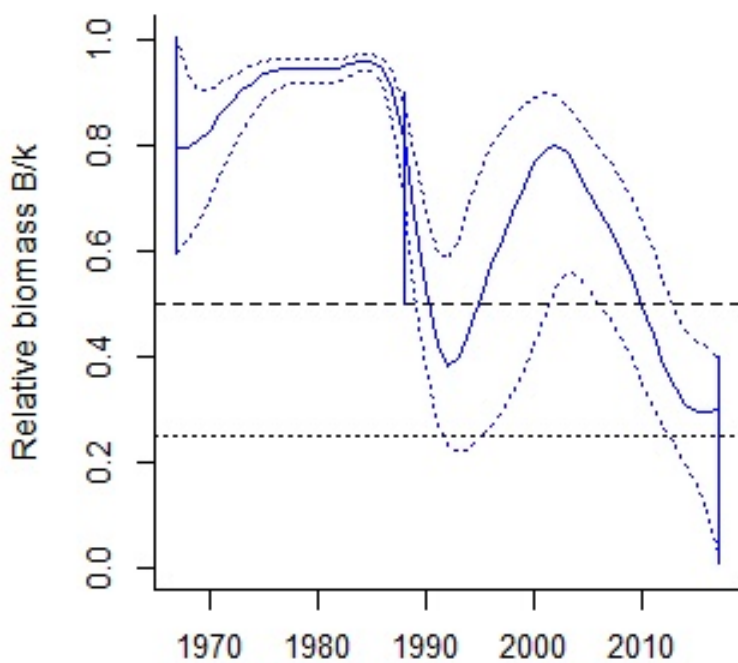

**E: Exploitation rate**

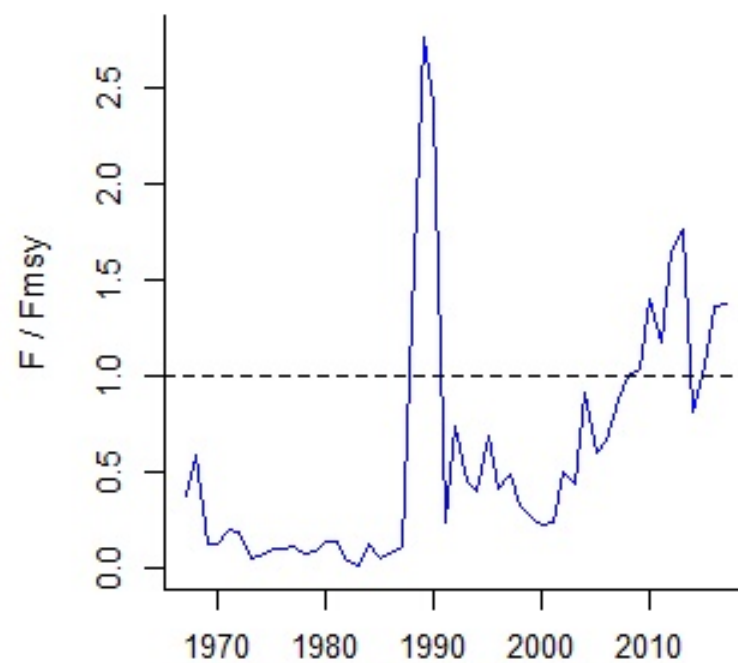

**F: Equilibrium curve**

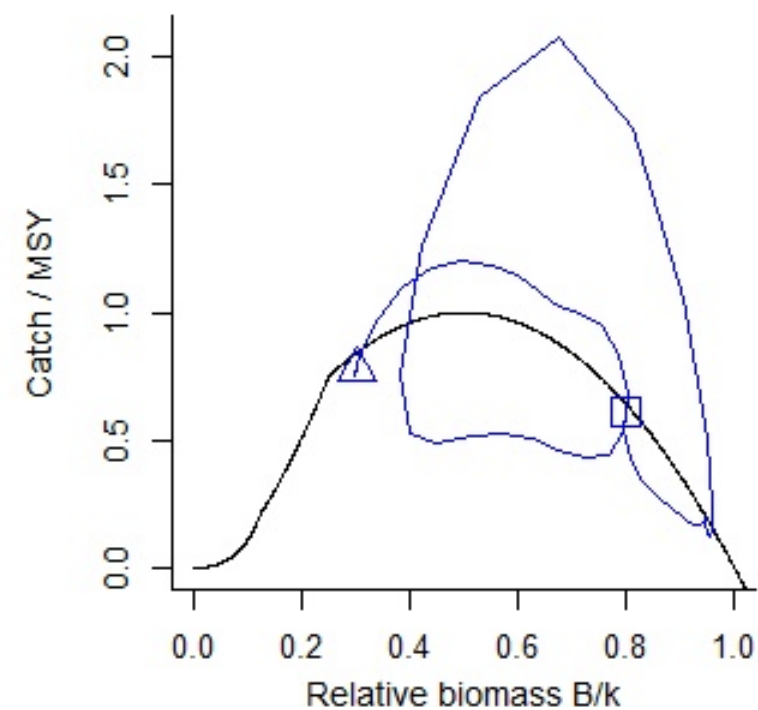

**Catch**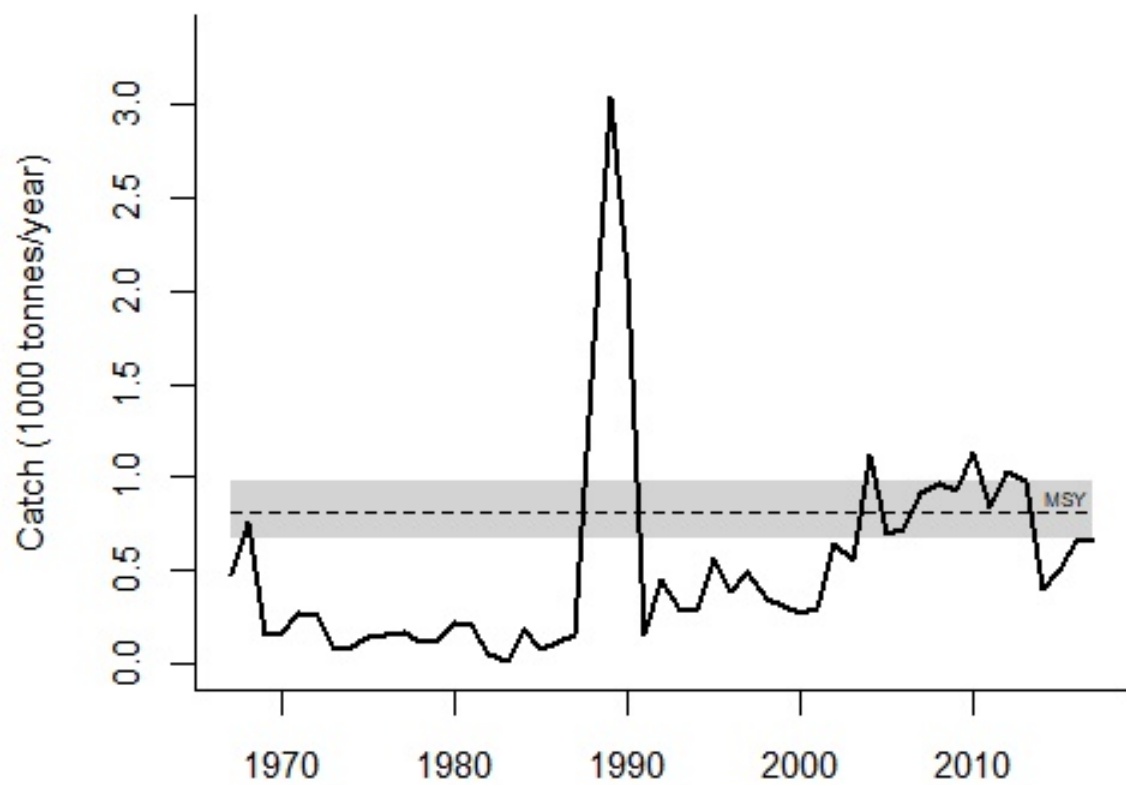**Stock size**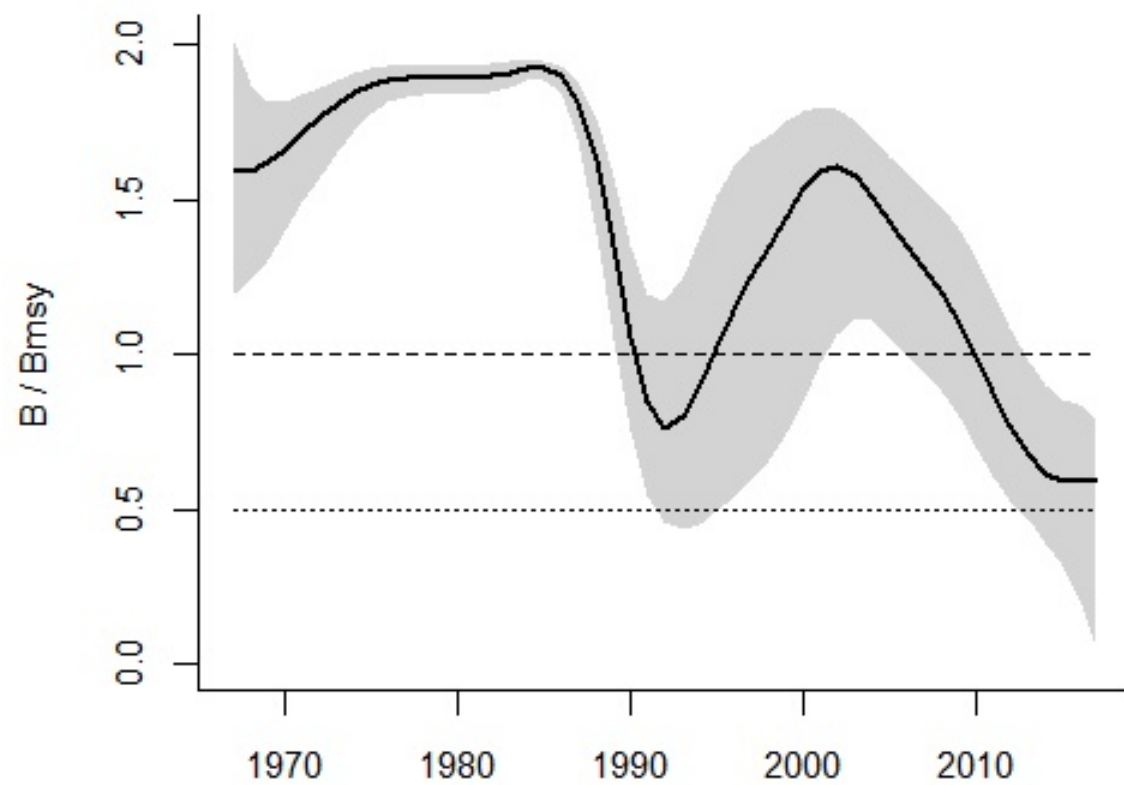**Exploitation**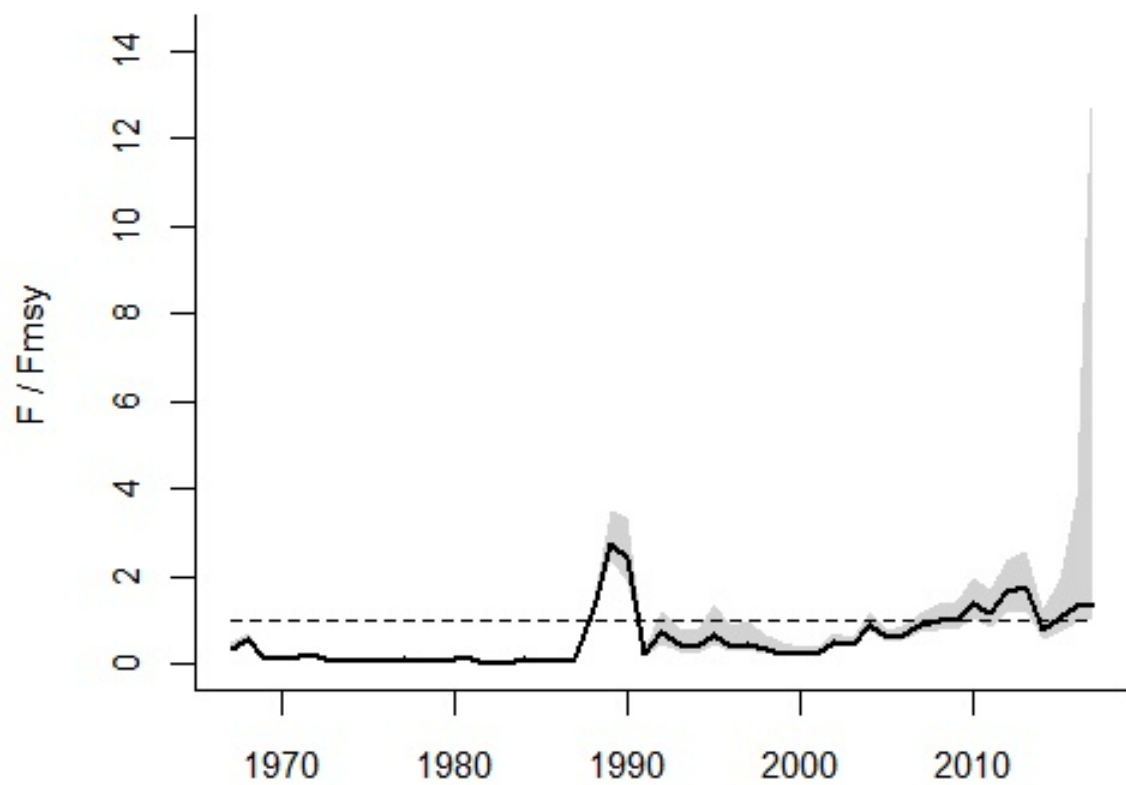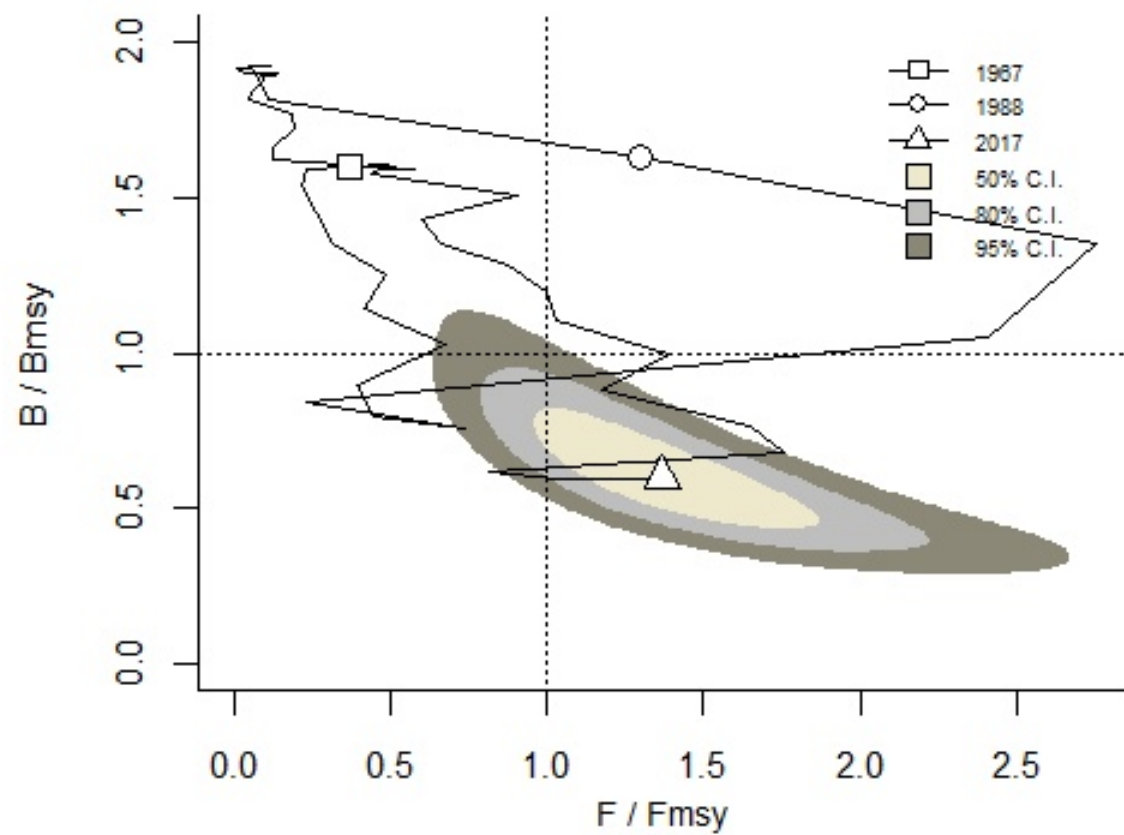

**A: Catch Anchovy\_MS**

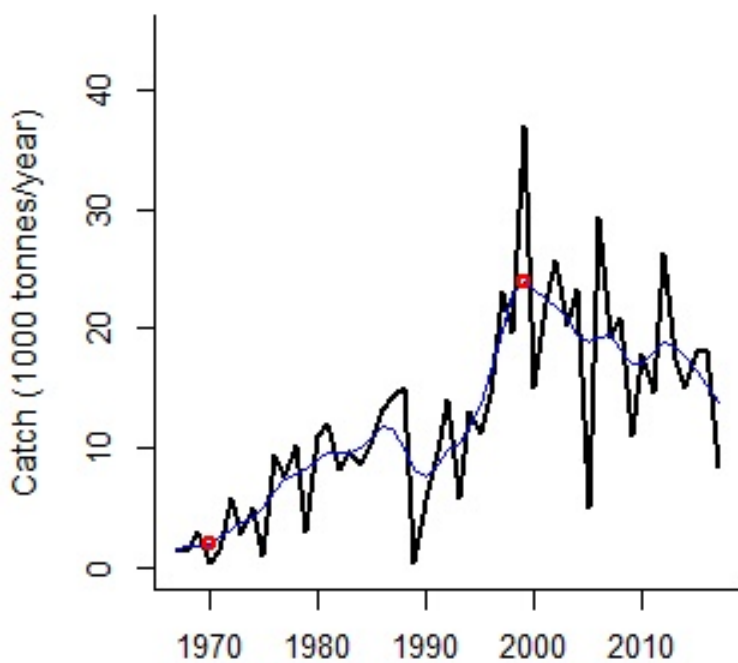

**B: Finding viable r-k**

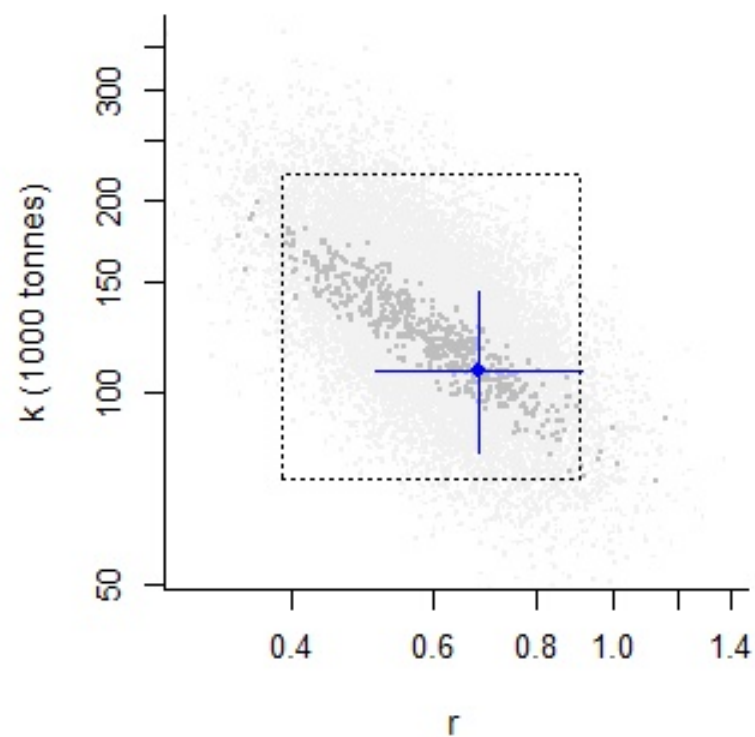

**C: Analysis of viable r-k**

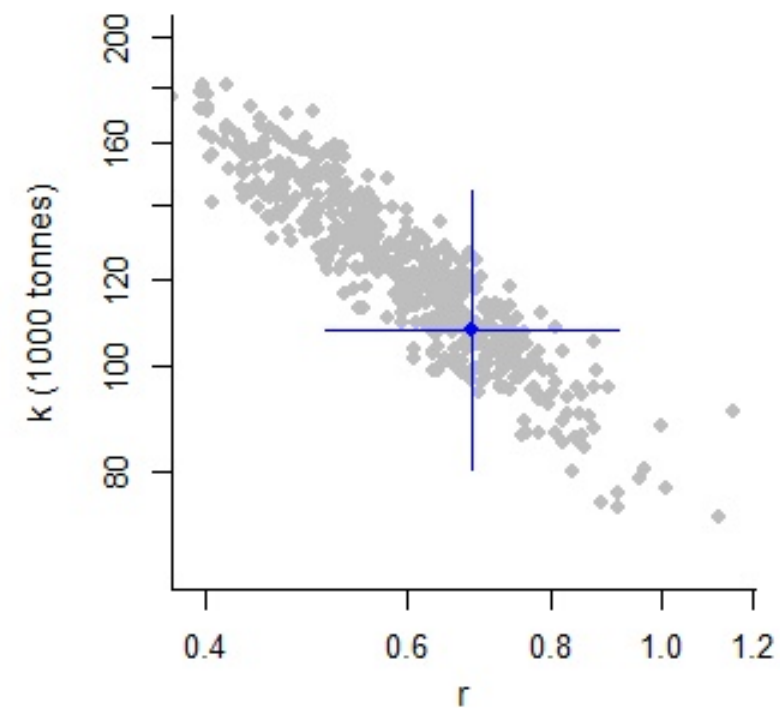

**D: Stock size**

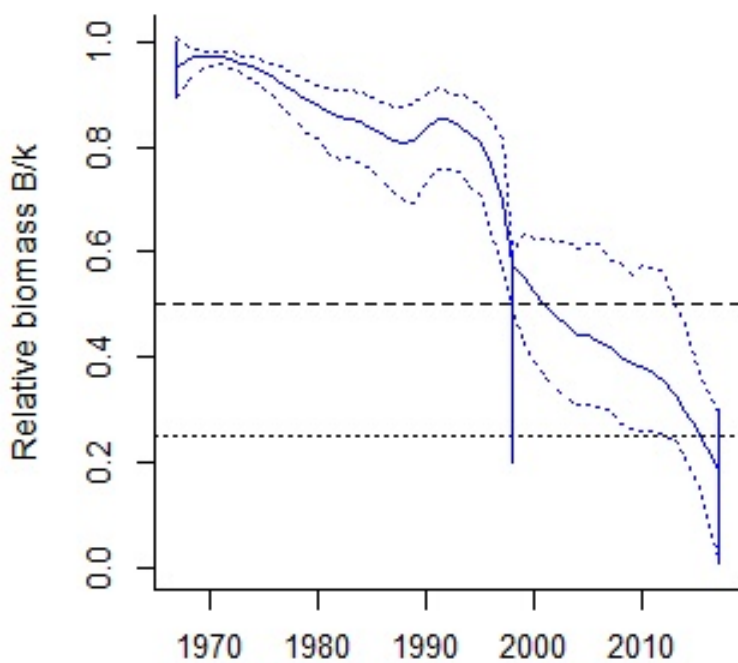

**E: Exploitation rate**

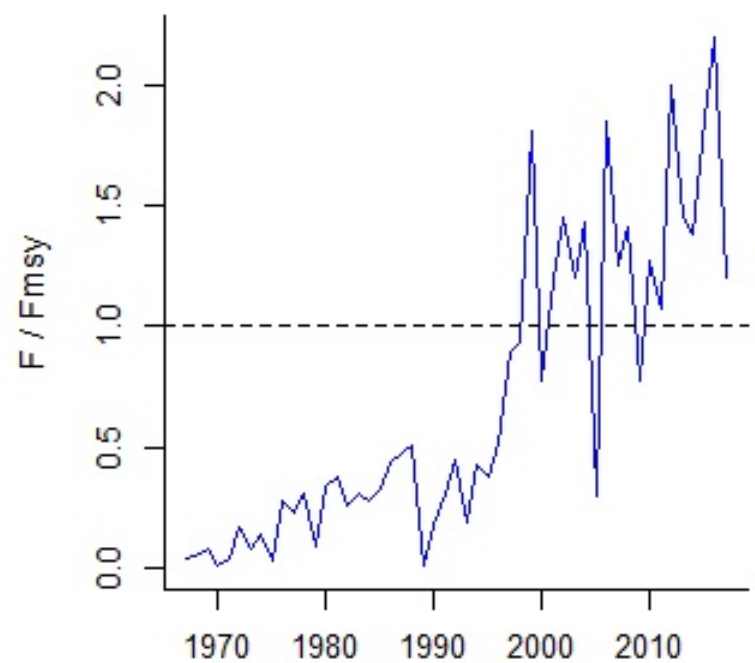

**F: Equilibrium curve**

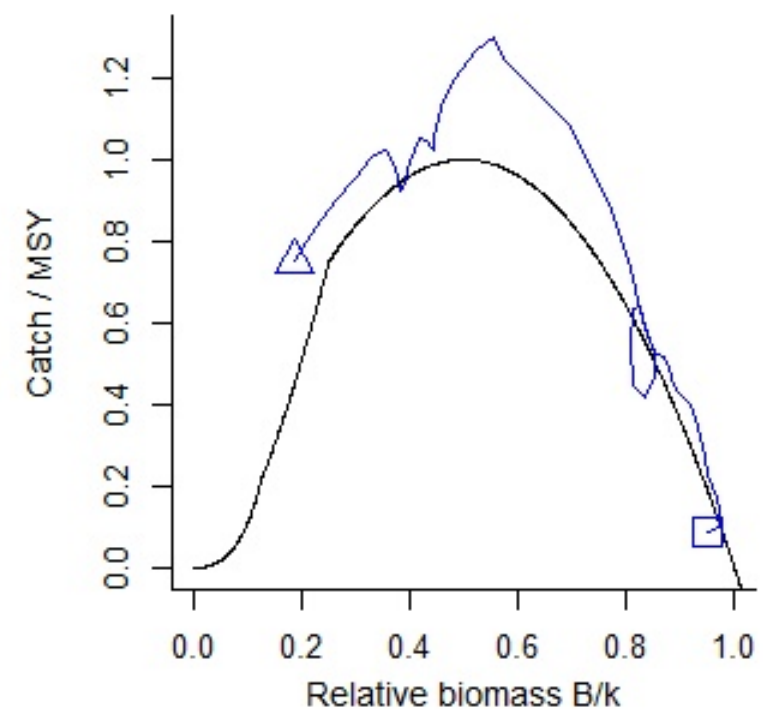



**Catch**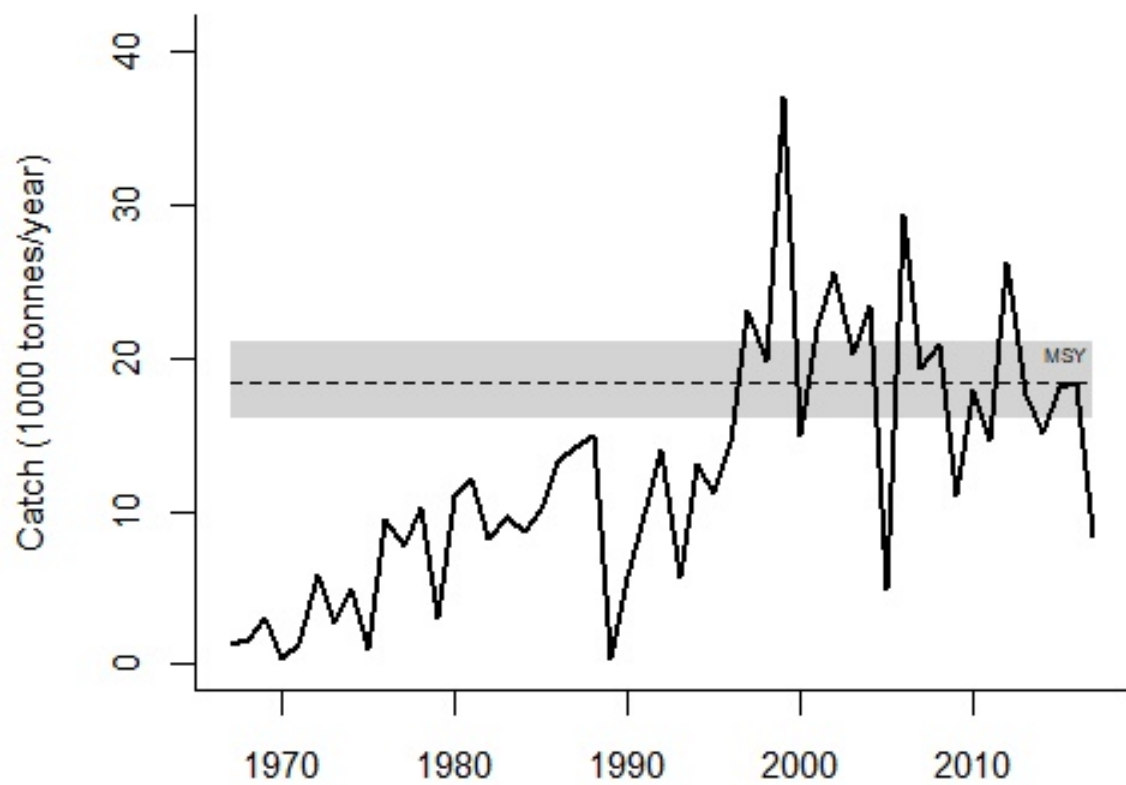**Stock size**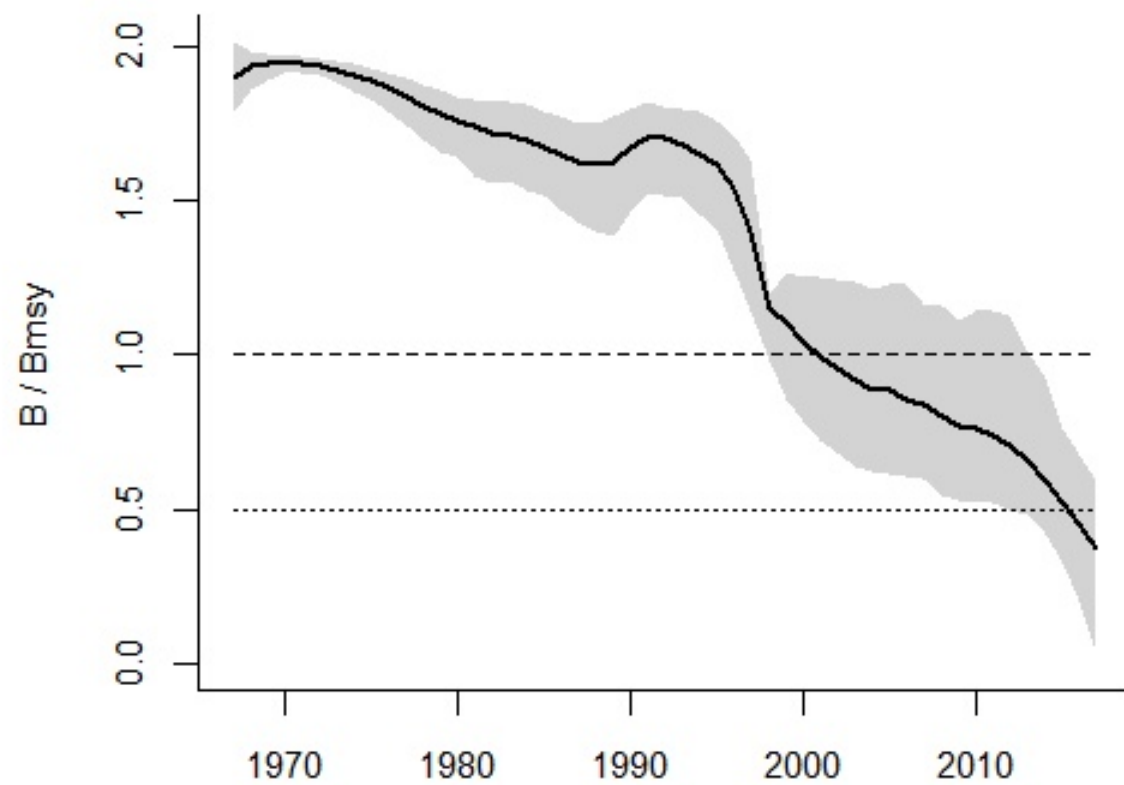**Exploitation**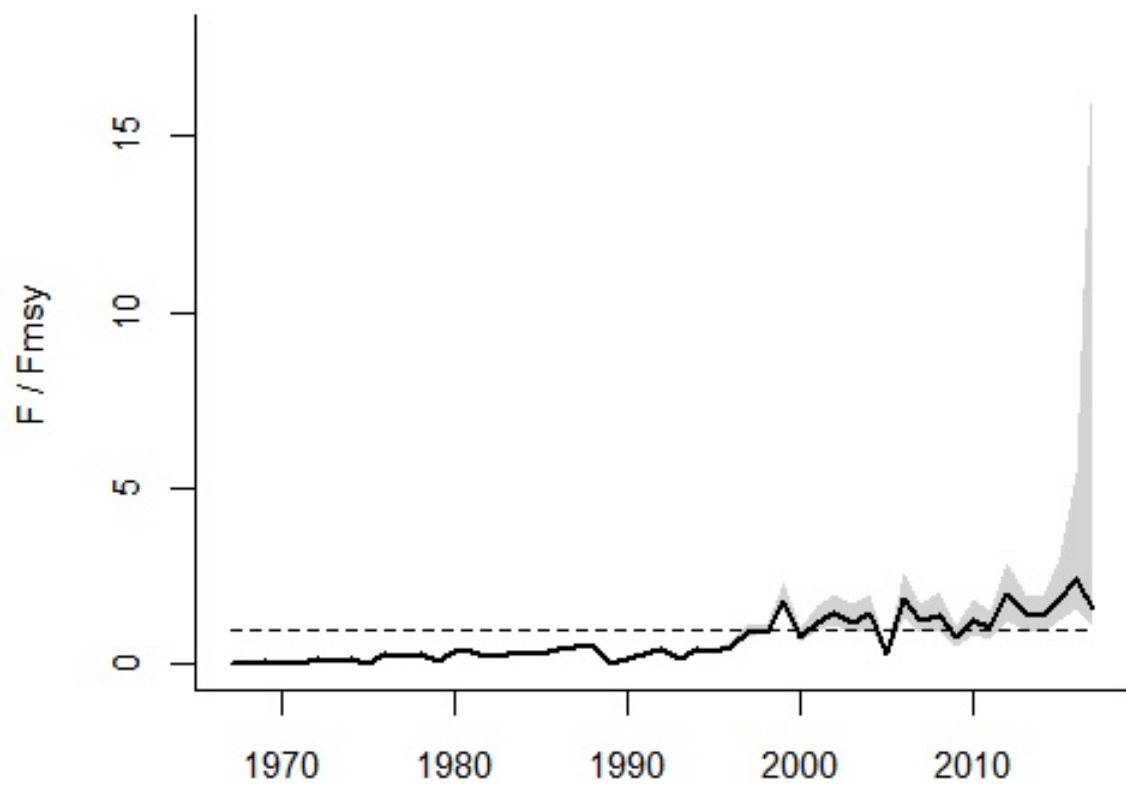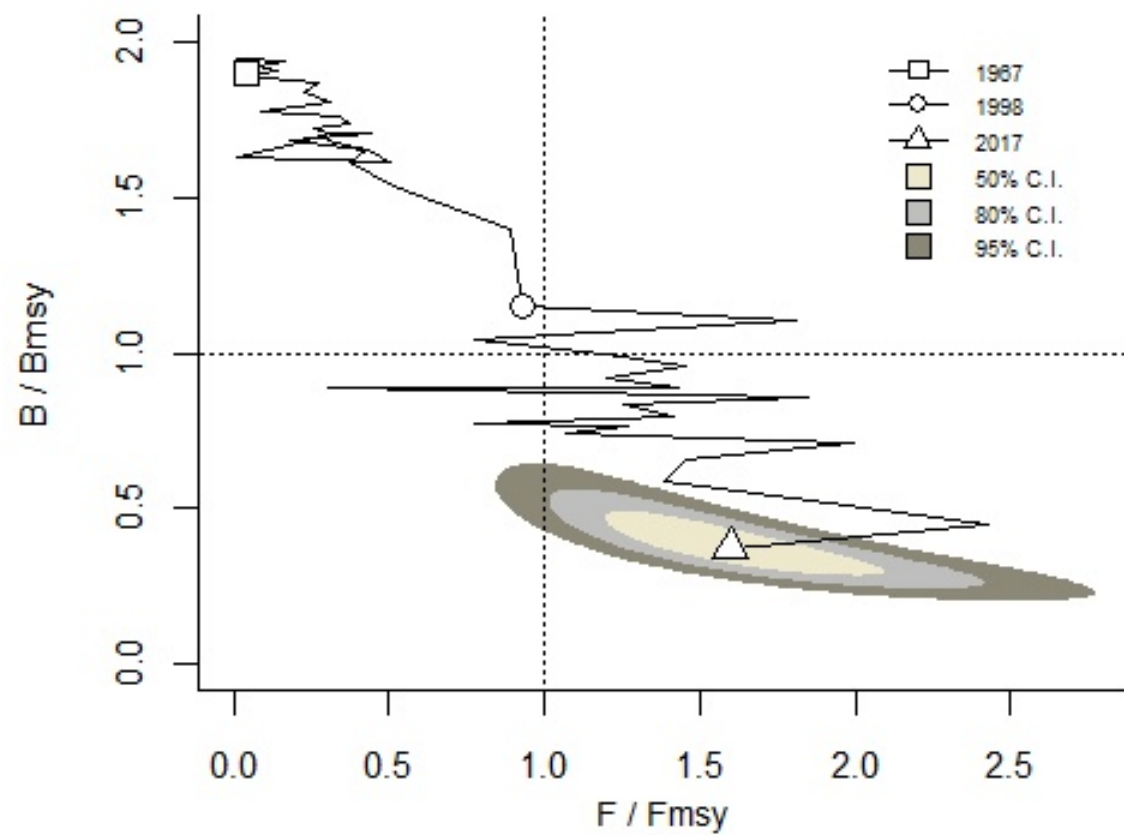

**A: Catch Sardine\_MS**

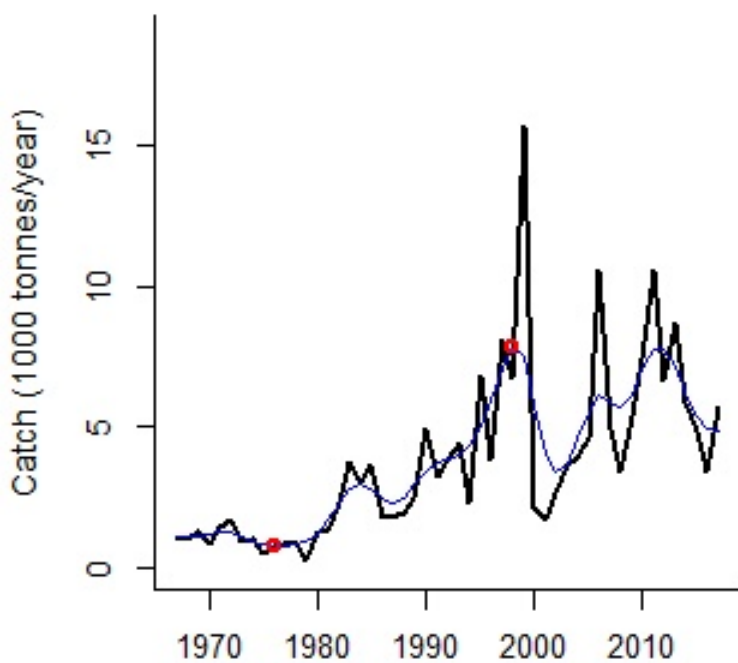

**B: Finding viable r-k**

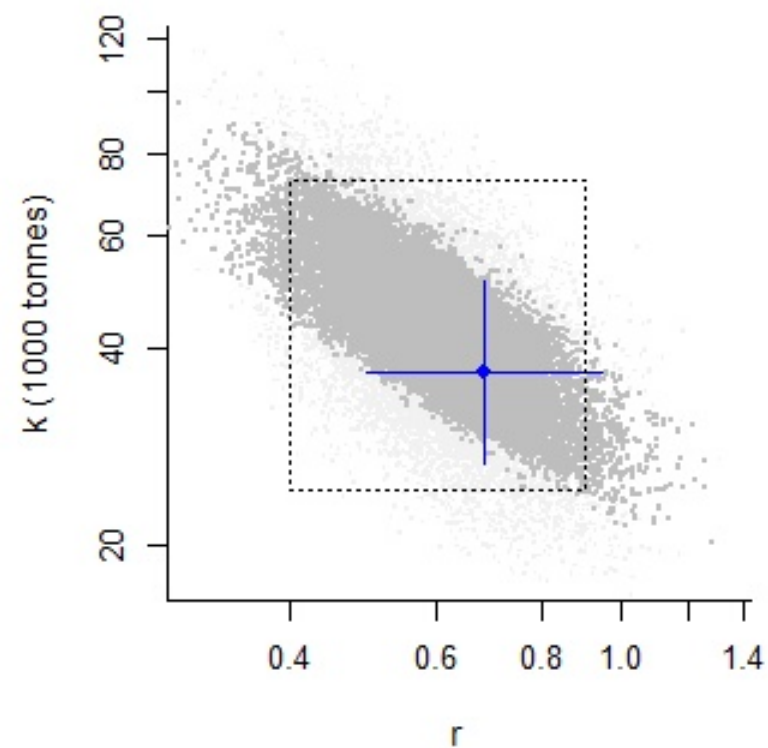

**C: Analysis of viable r-k**

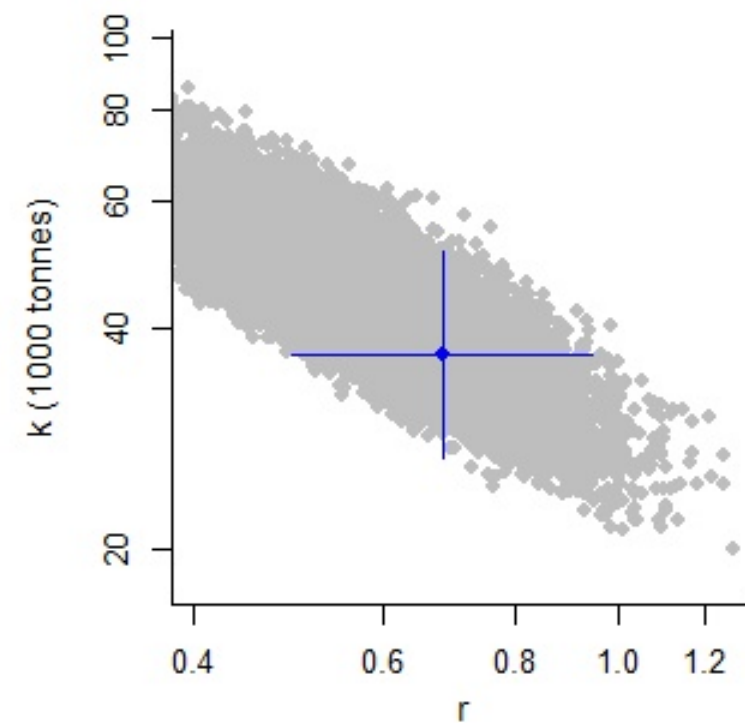

**D: Stock size**

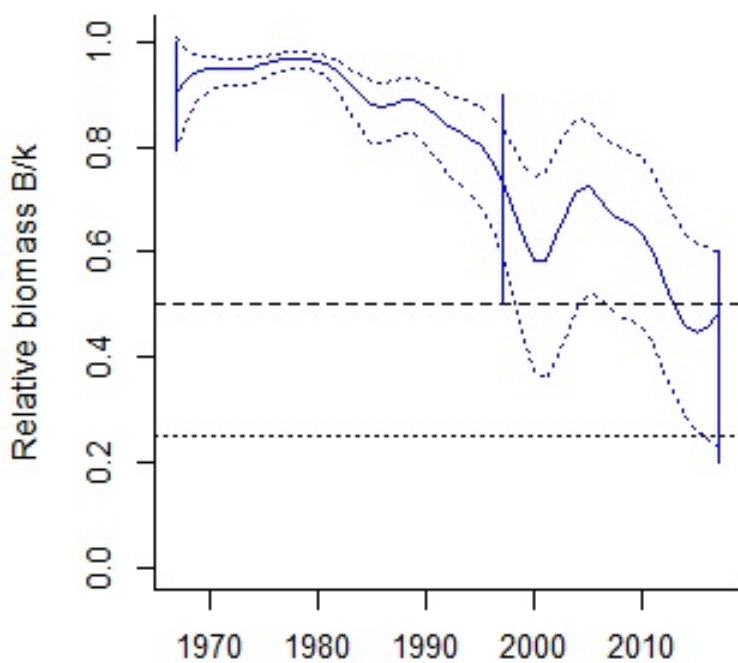

**E: Exploitation rate**

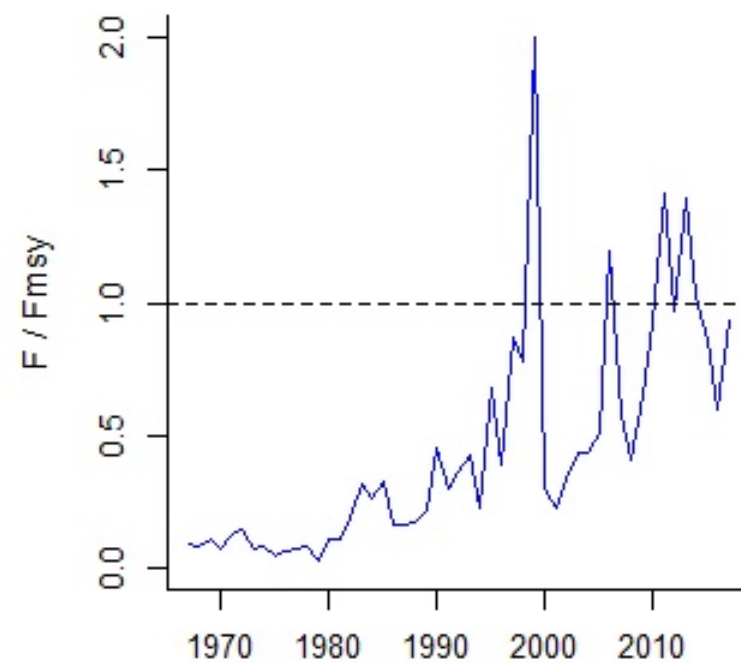

**F: Equilibrium curve**

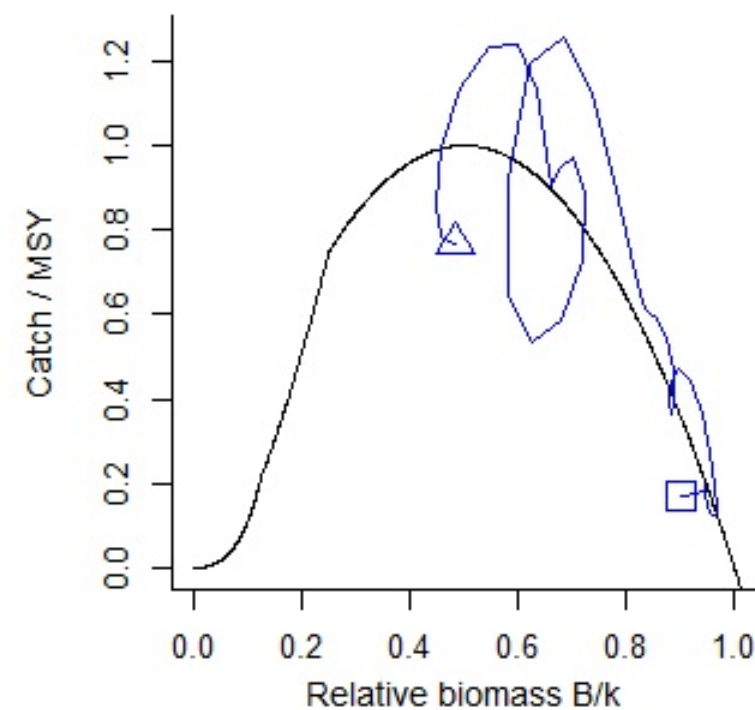

**Catch**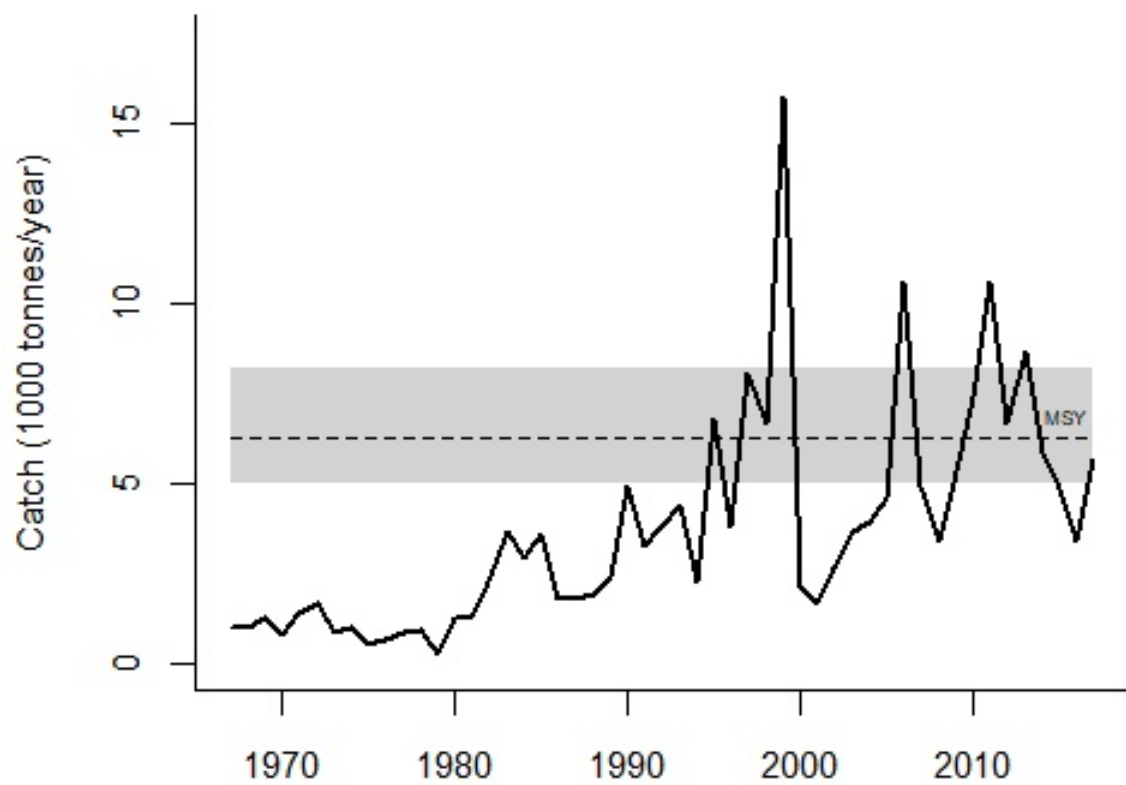**Stock size**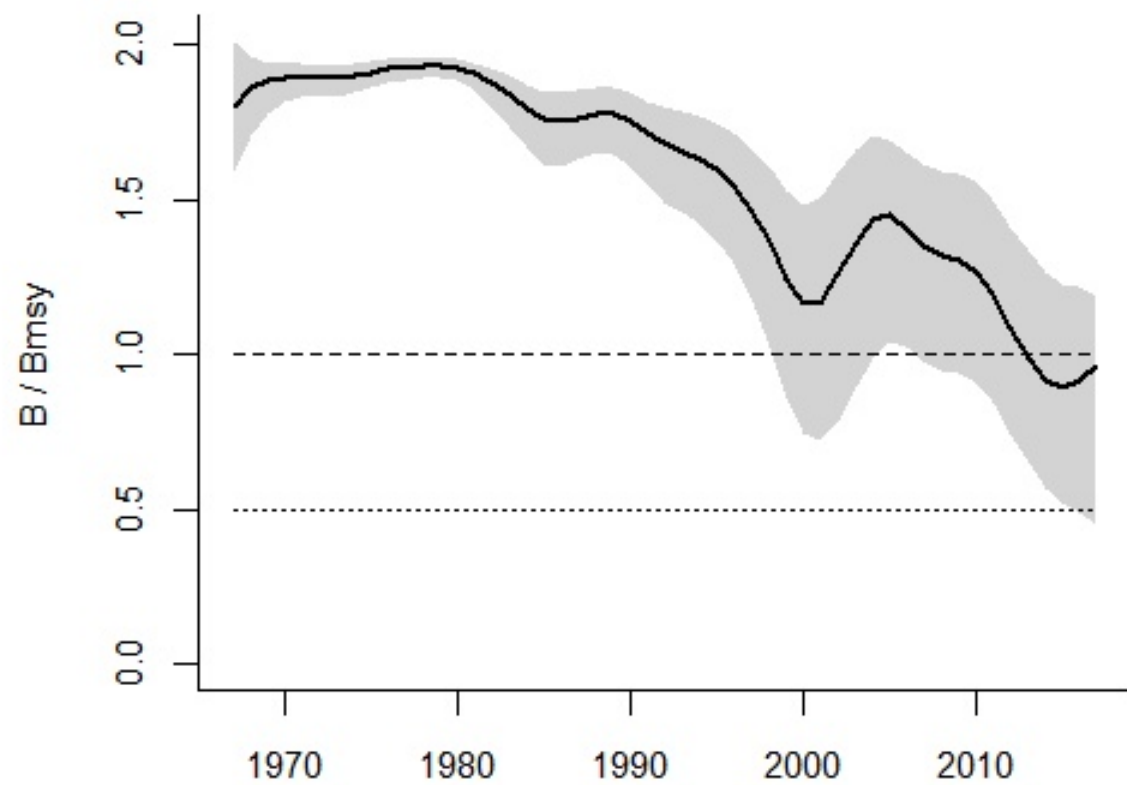**Exploitation**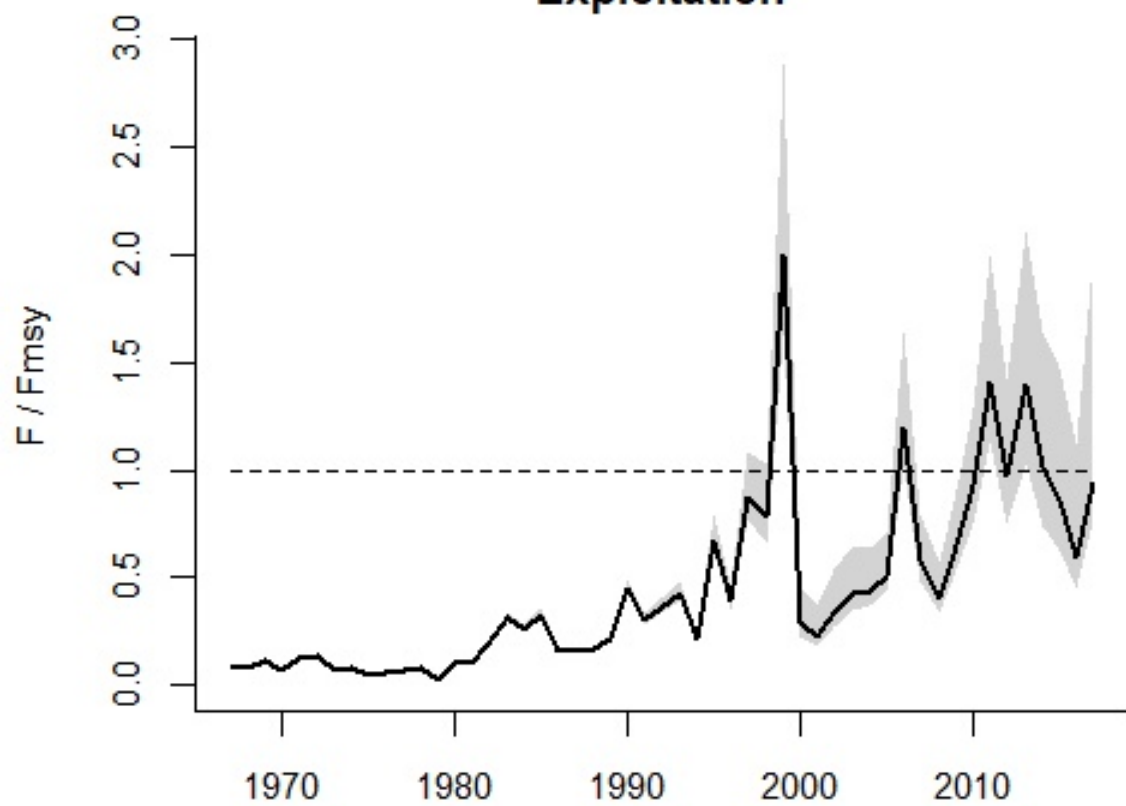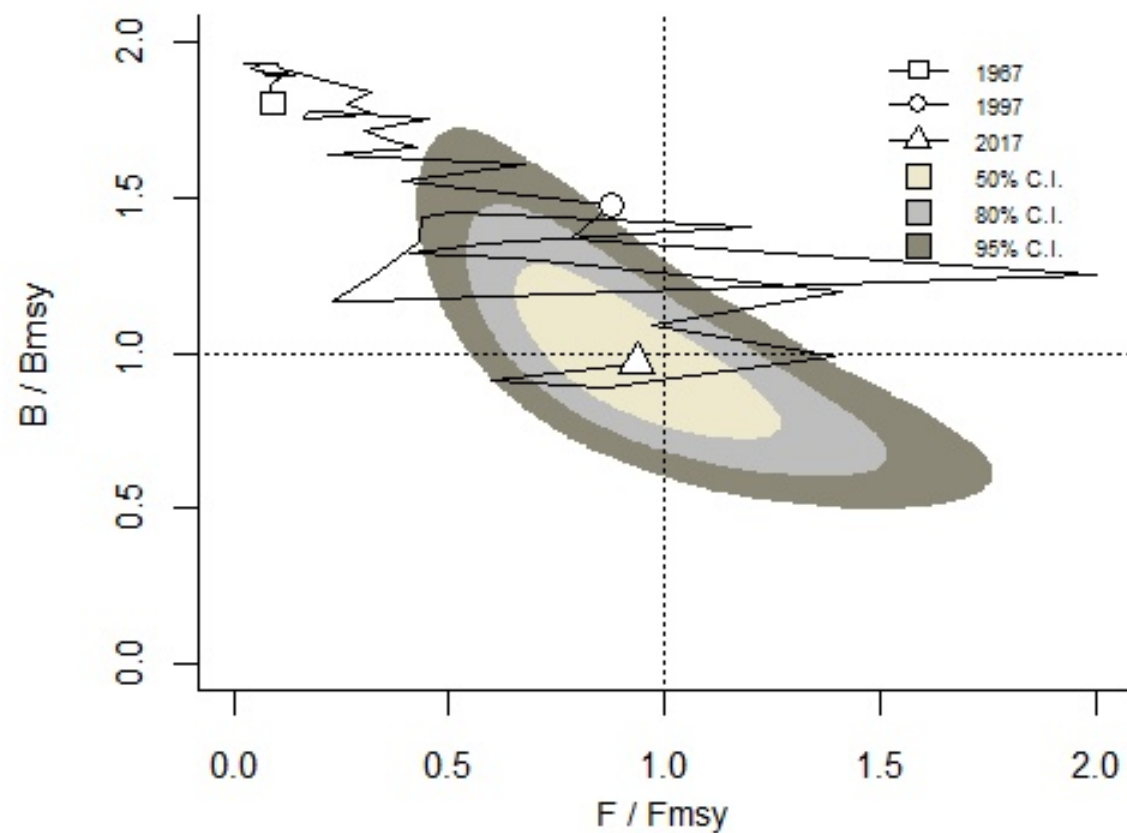

**A: Catch HorseMack\_MS**

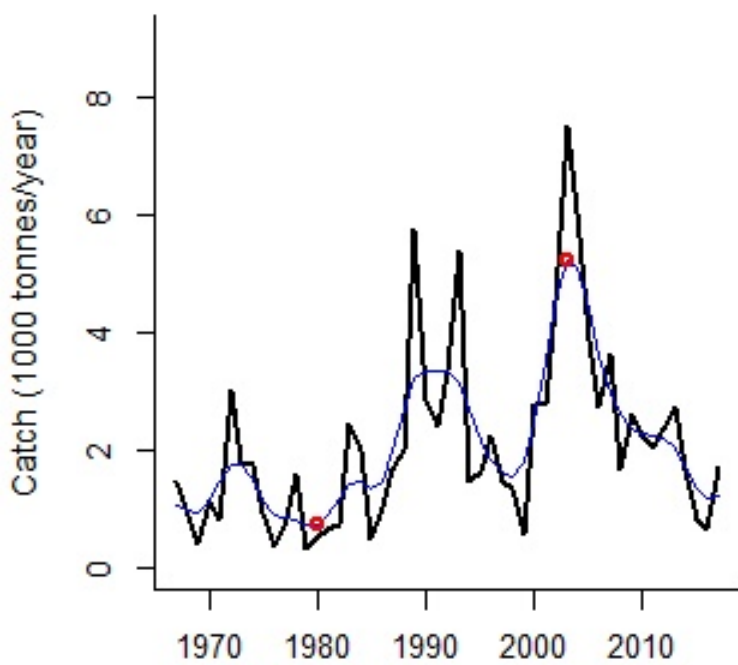

**B: Finding viable r-k**

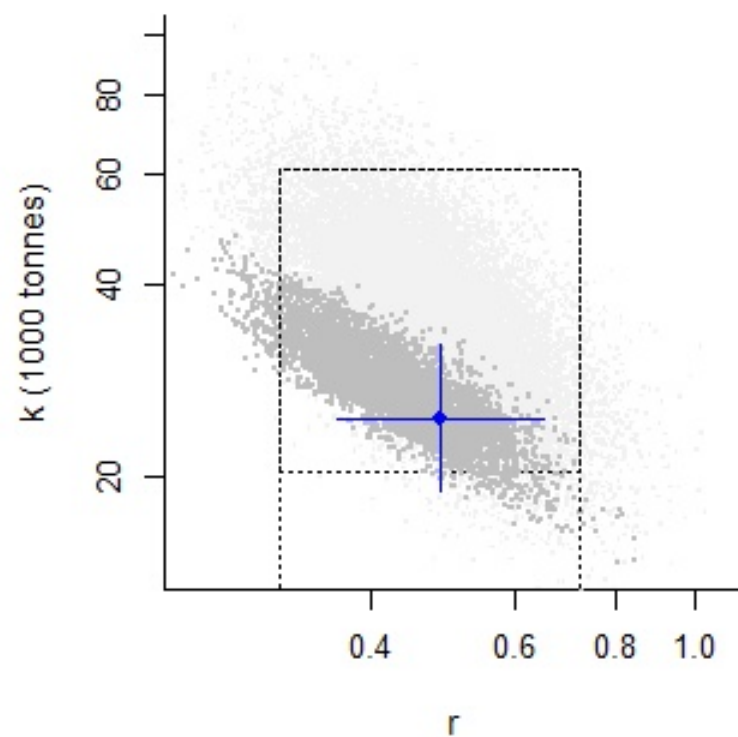

**C: Analysis of viable r-k**

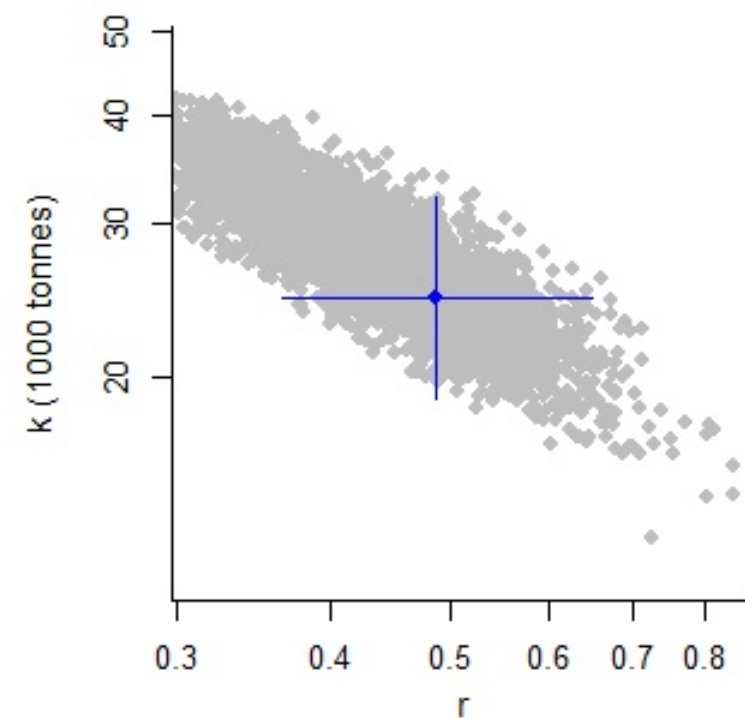

**D: Stock size**

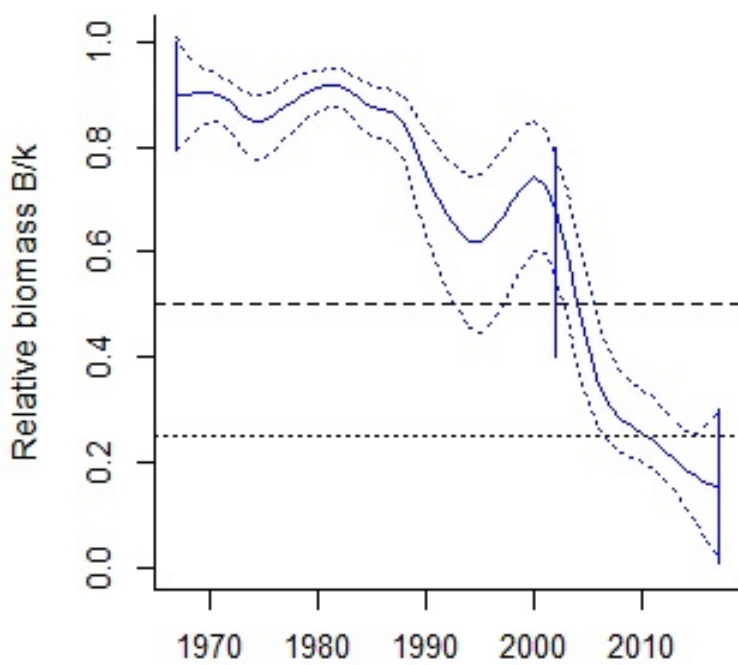

**E: Exploitation rate**

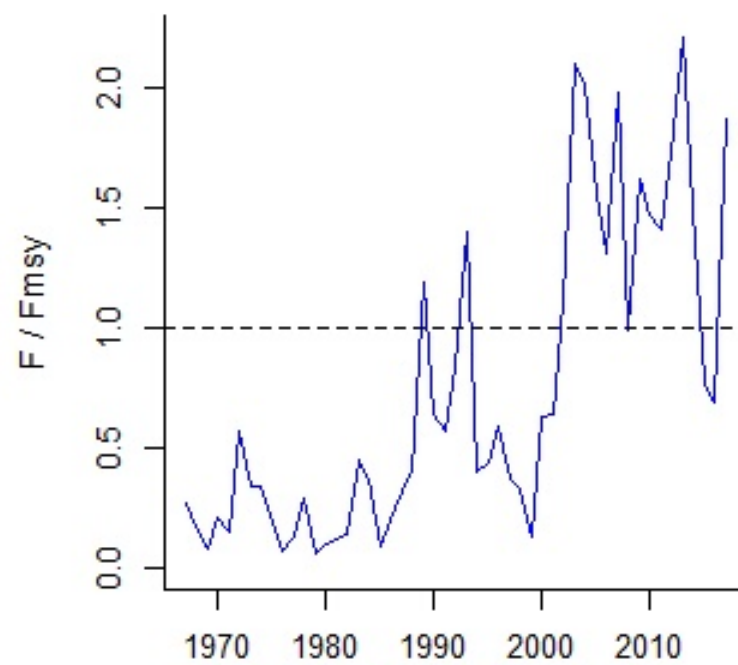

**F: Equilibrium curve**

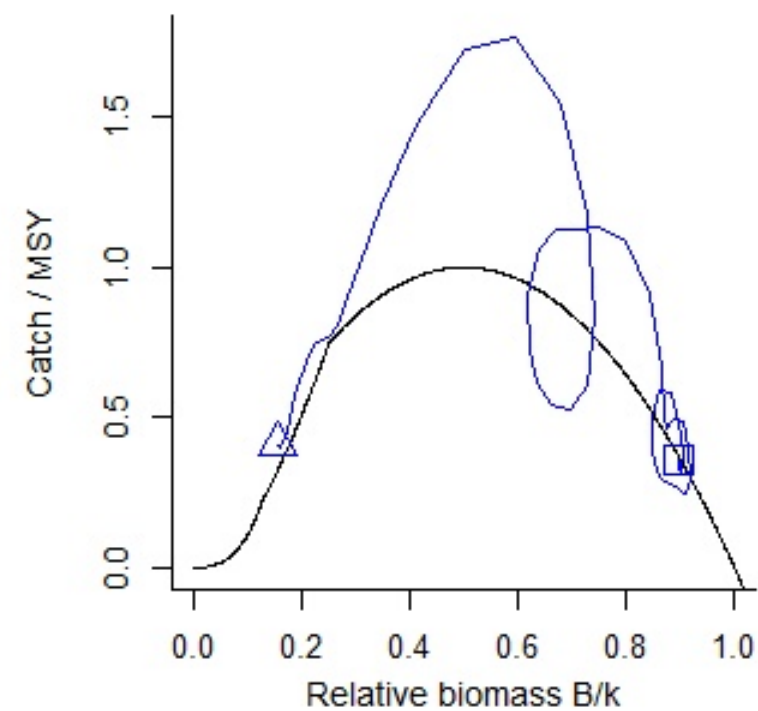



**Catch**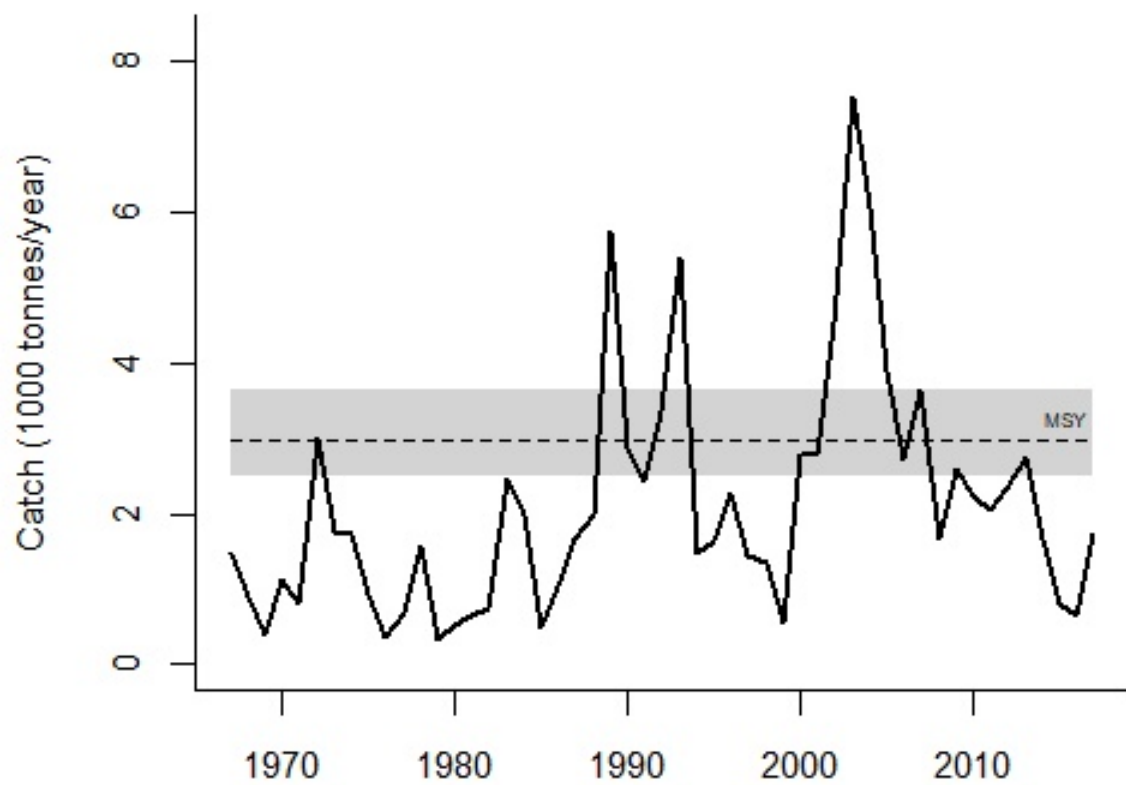**Stock size**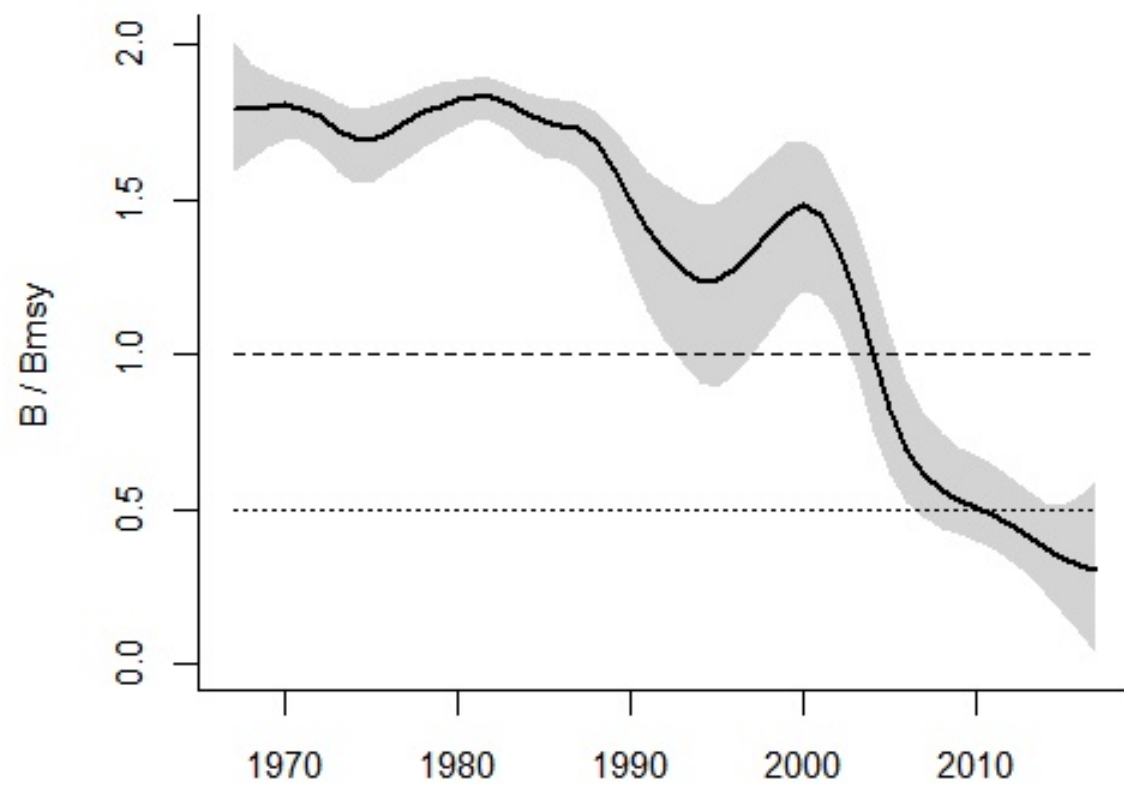**Exploitation**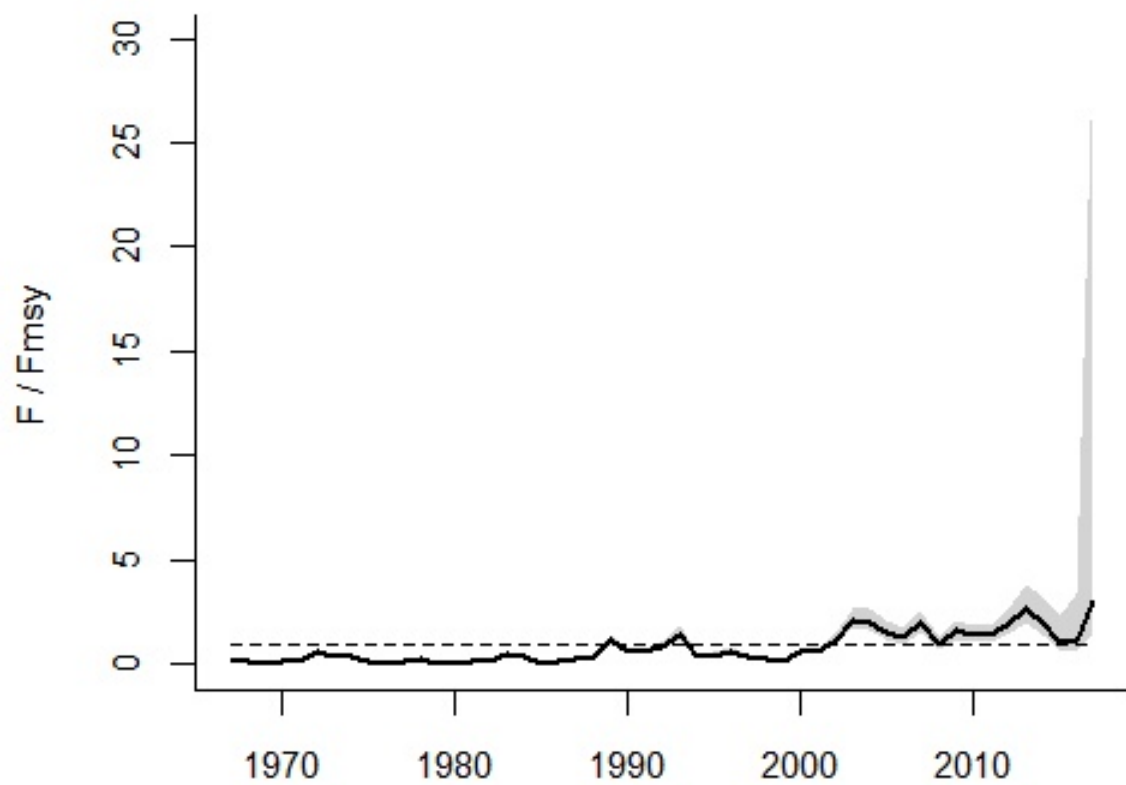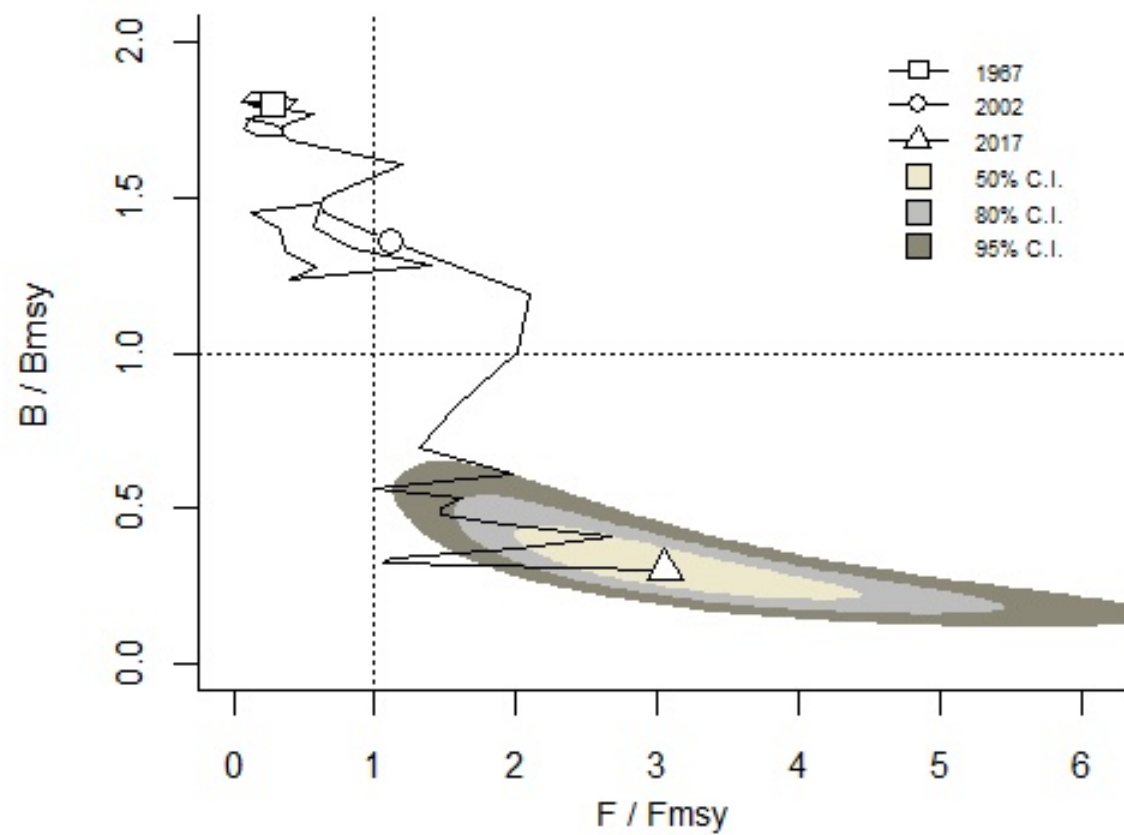

**A: Catch MedHMack\_MS**

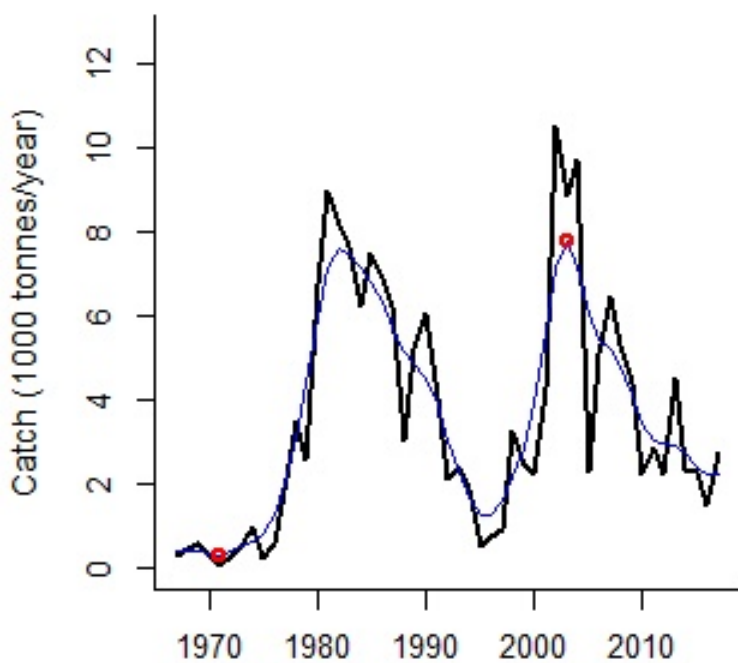

**B: Finding viable r-k**

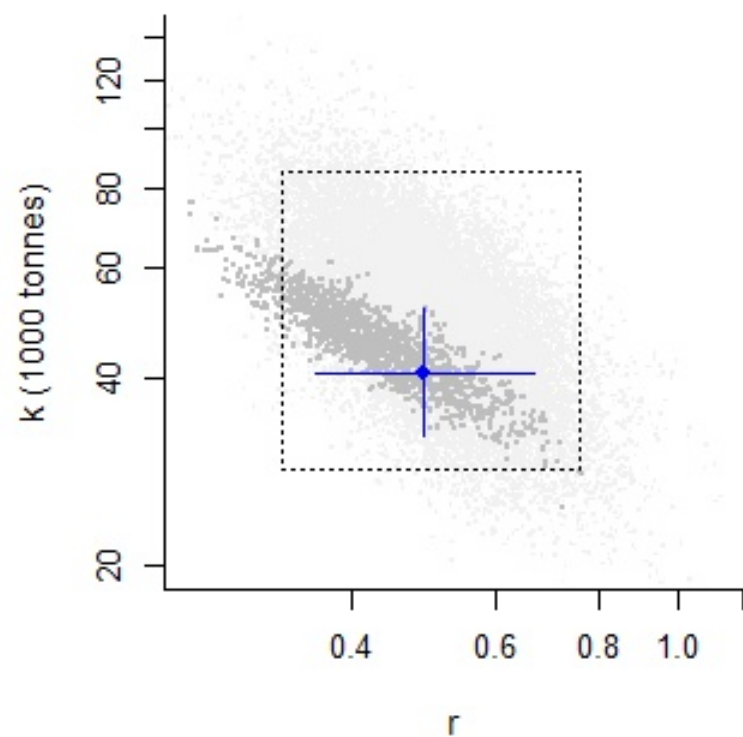

**C: Analysis of viable r-k**

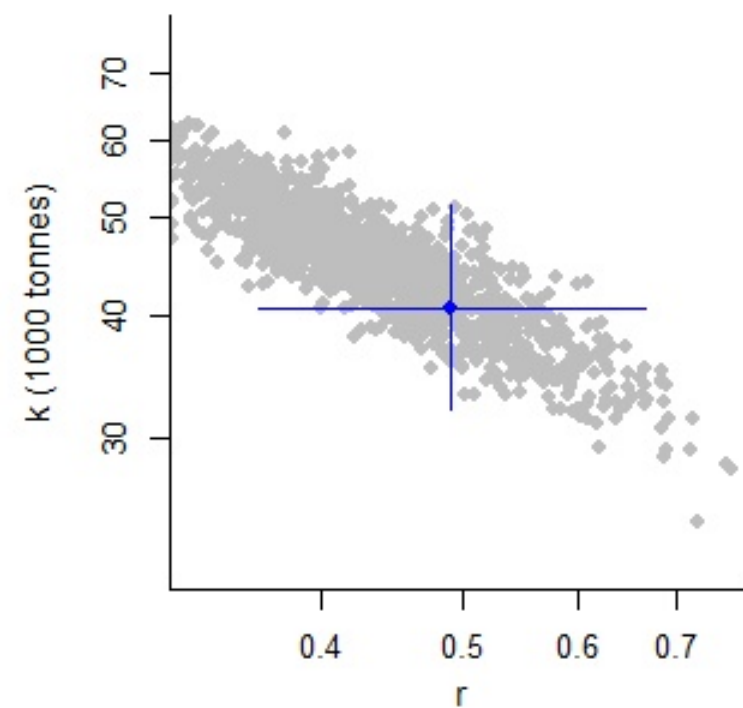

**D: Stock size**

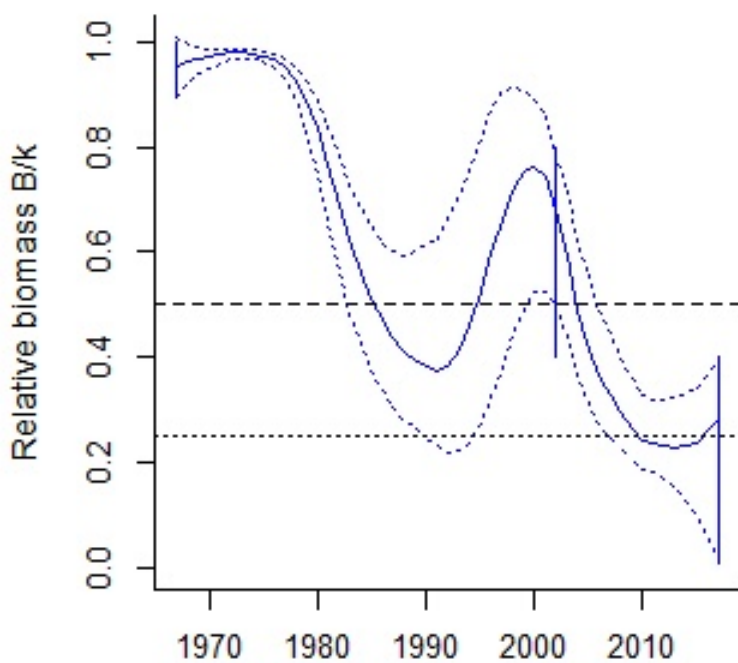

**E: Exploitation rate**

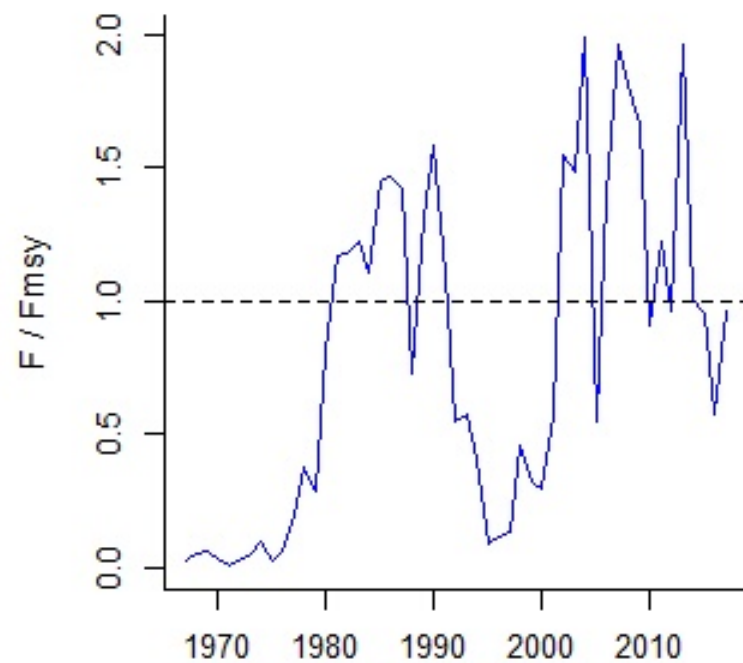

**F: Equilibrium curve**

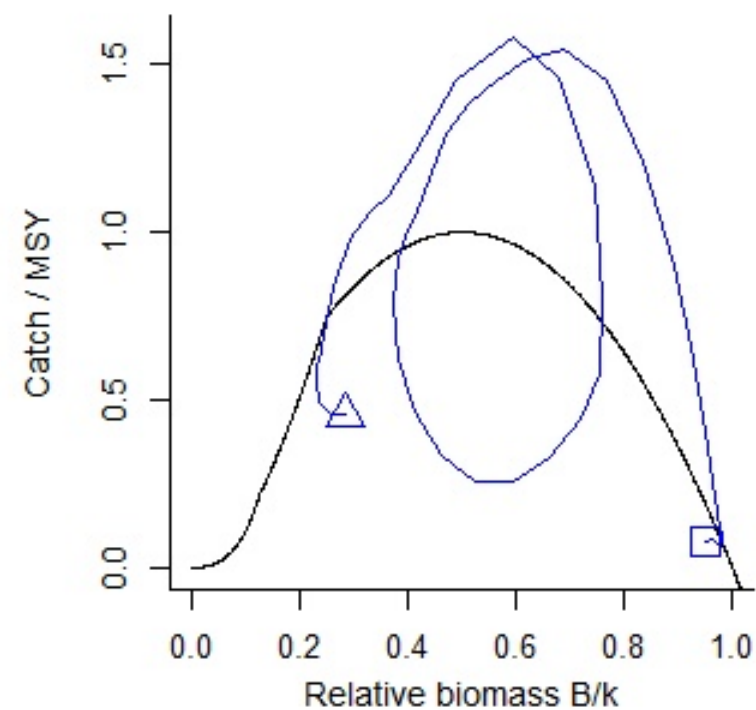

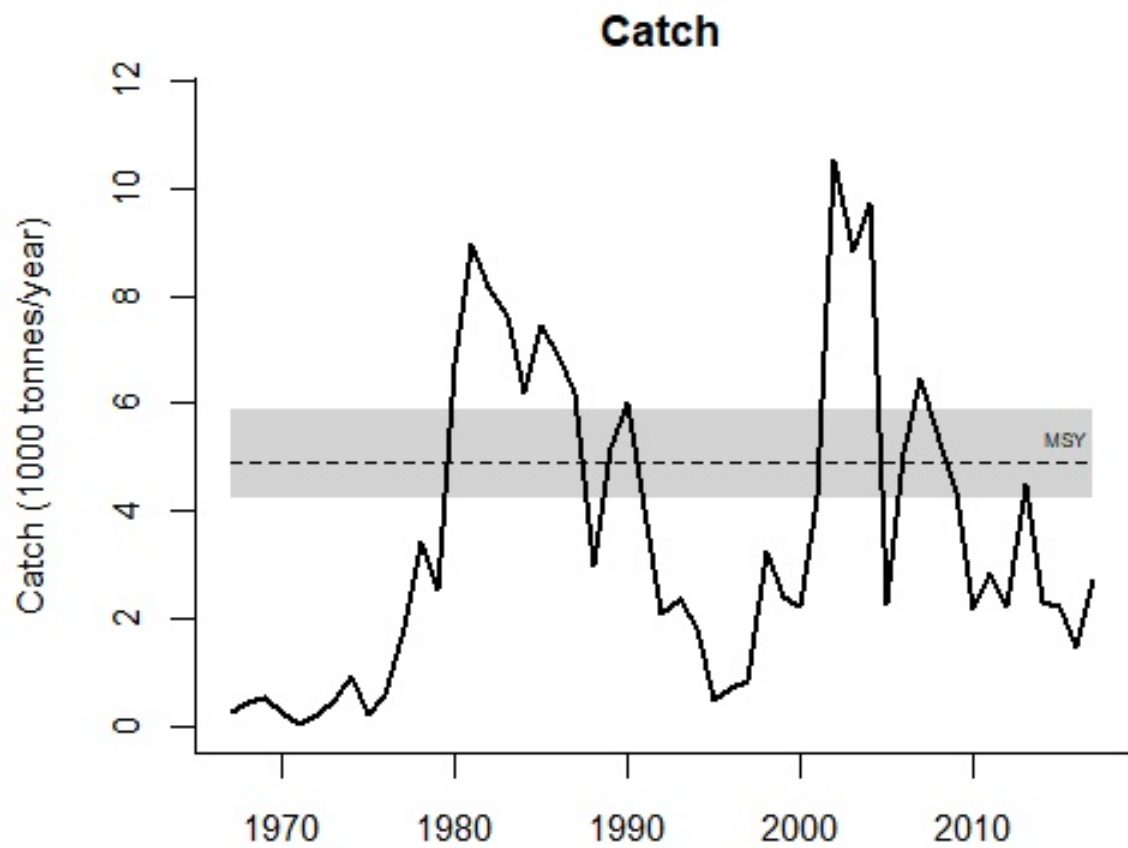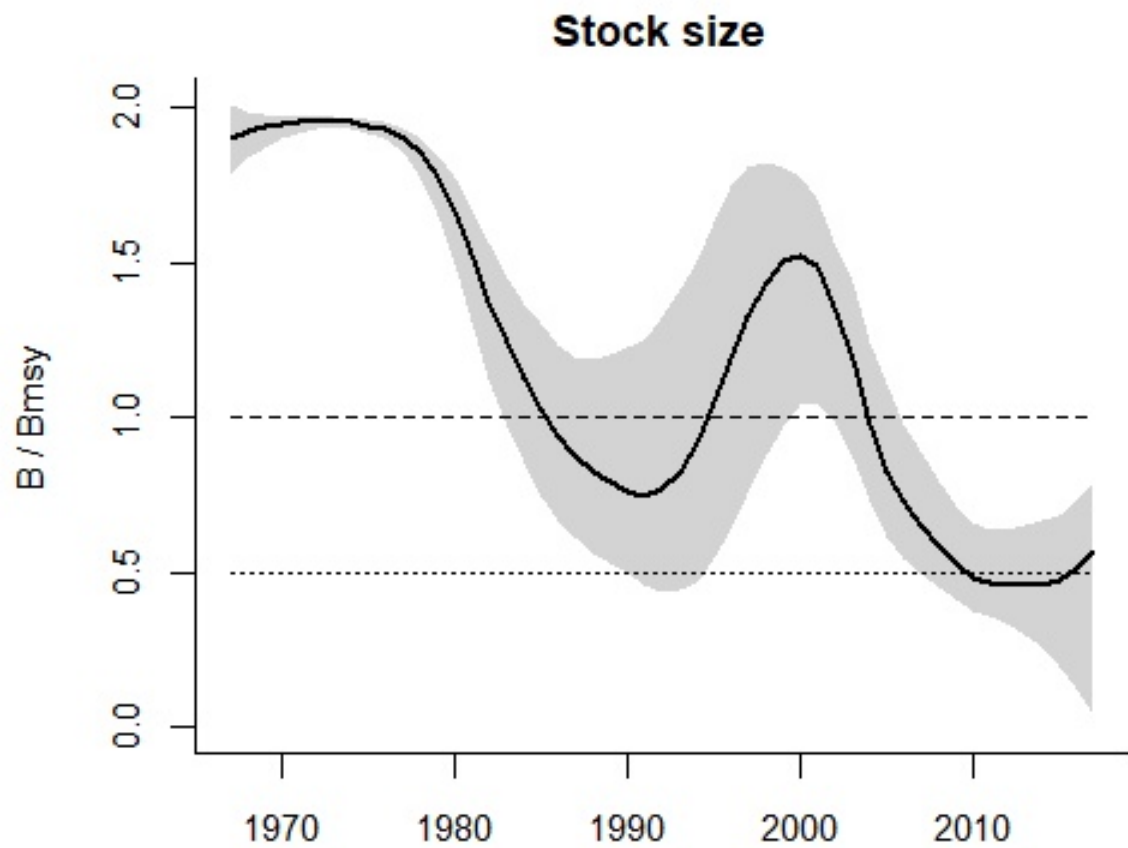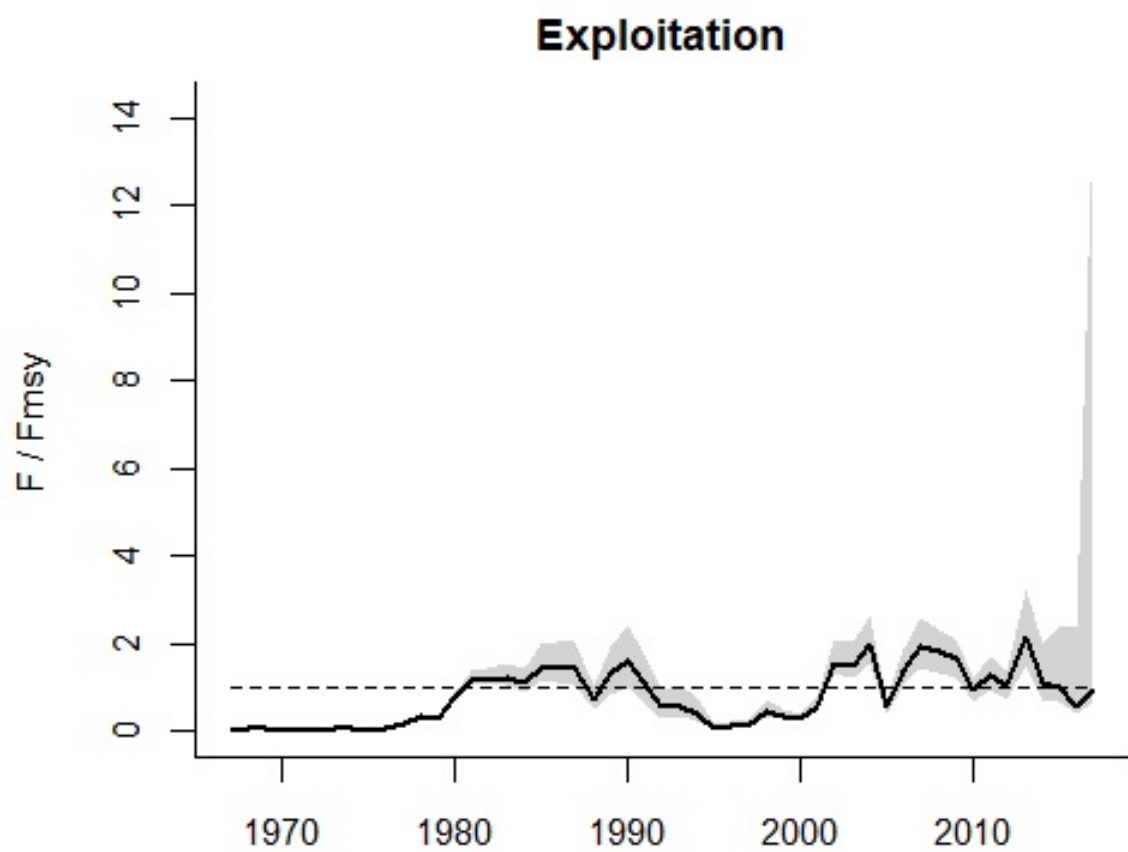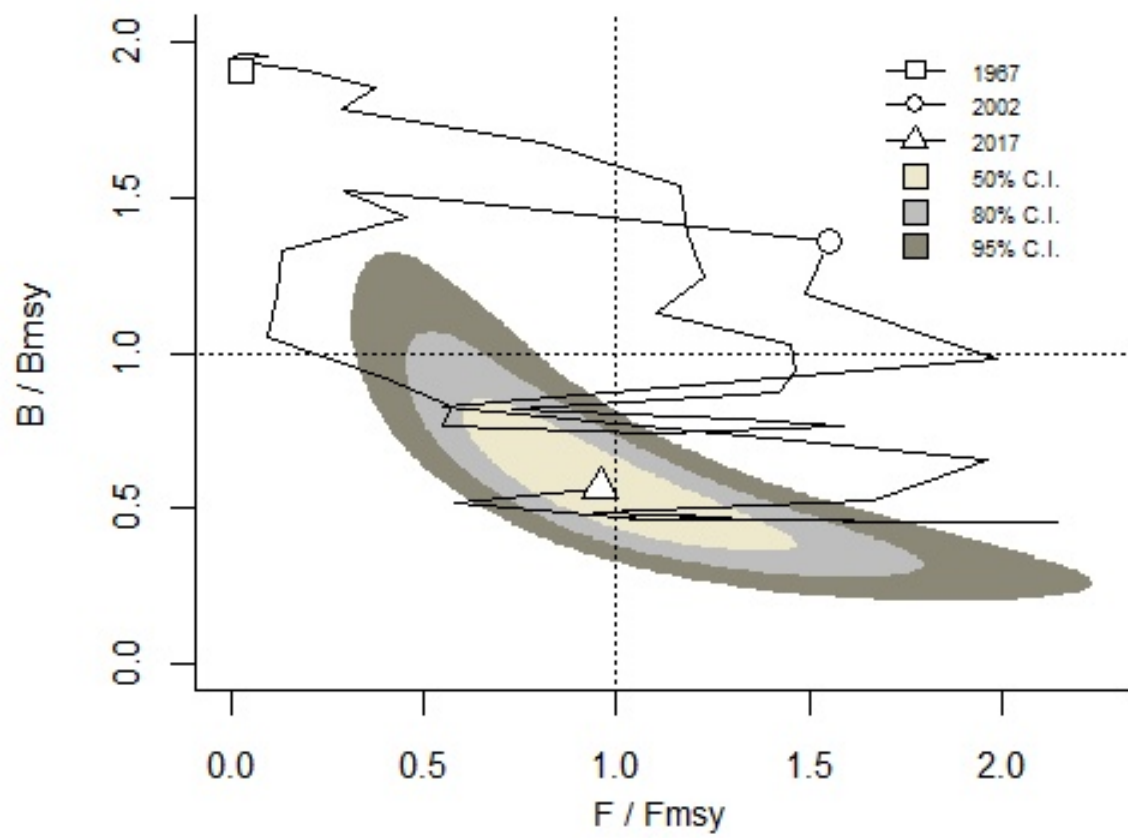

**A: Catch AChub\_MS**

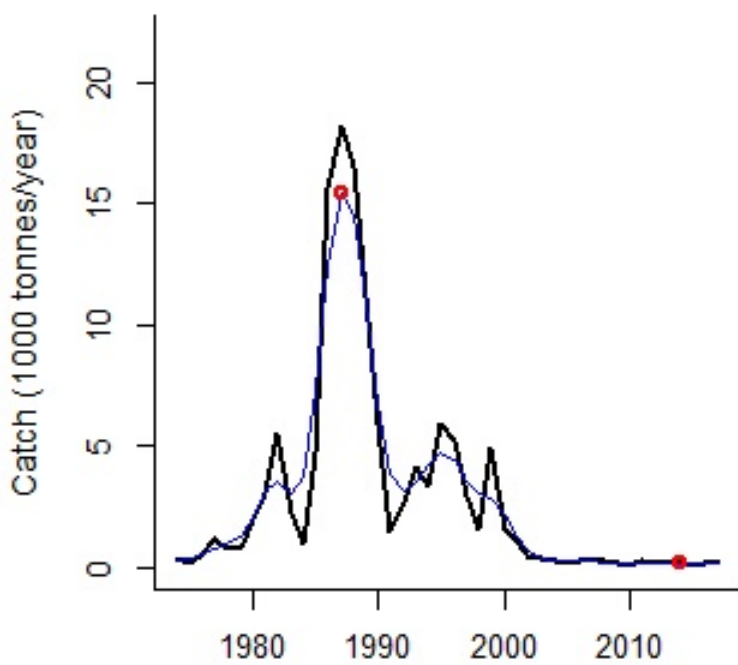

**B: Finding viable r-k**

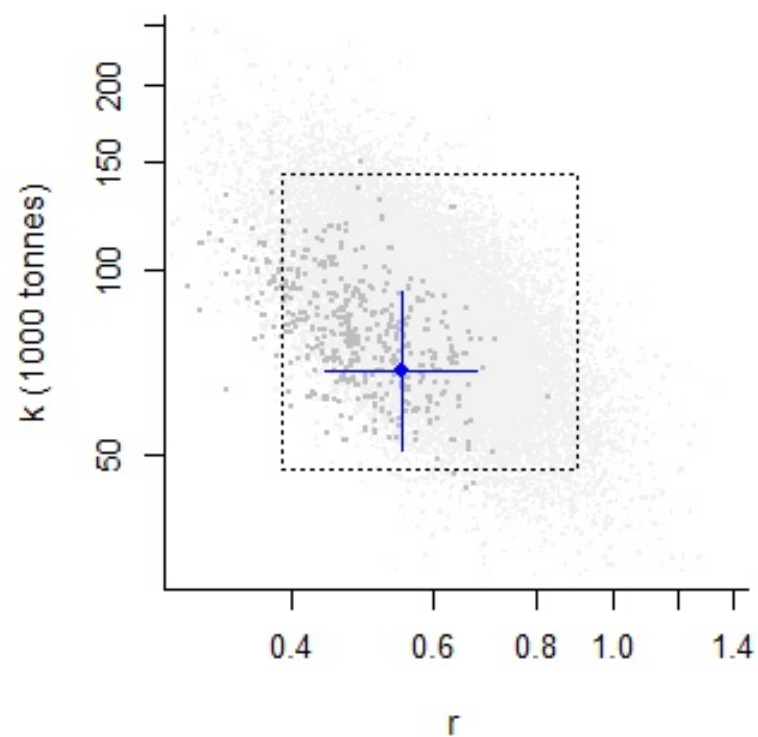

**C: Analysis of viable r-k**

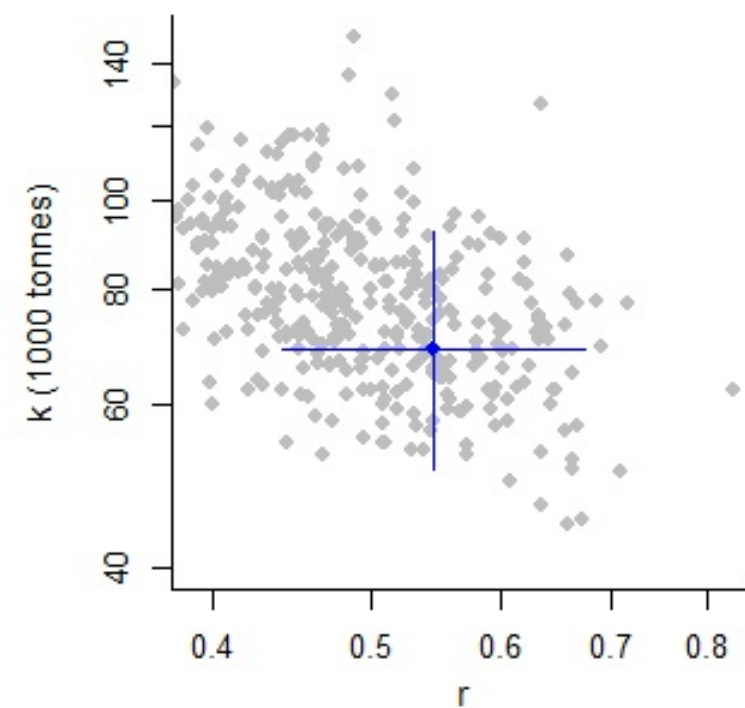

**D: Stock size**

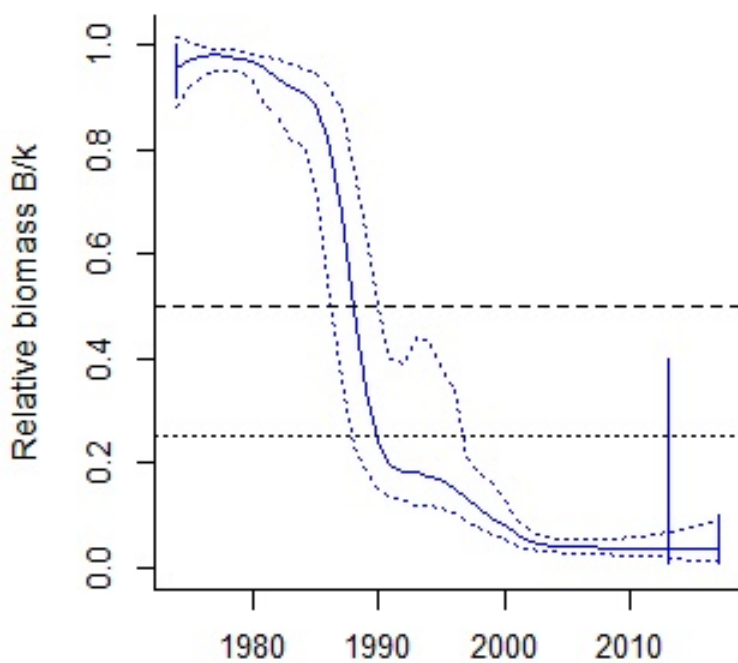

**E: Exploitation rate**

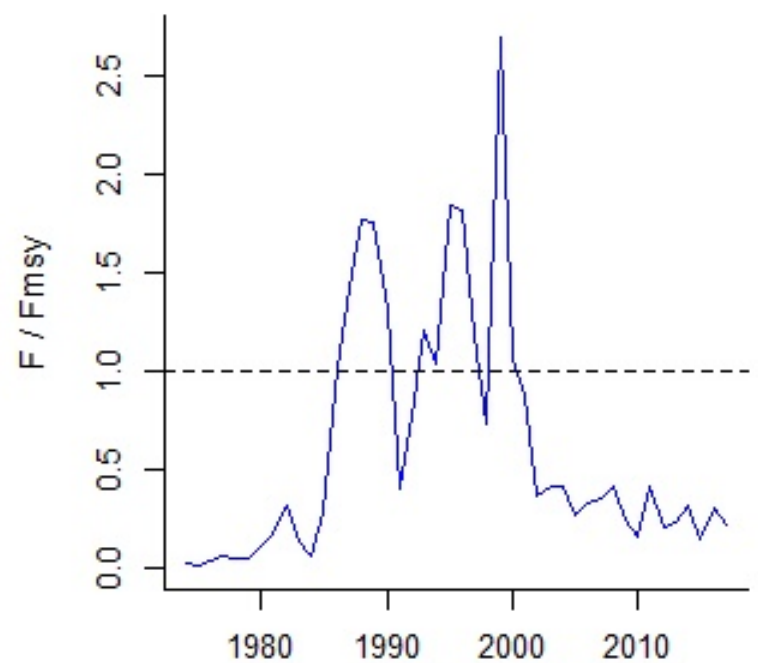

**F: Equilibrium curve**

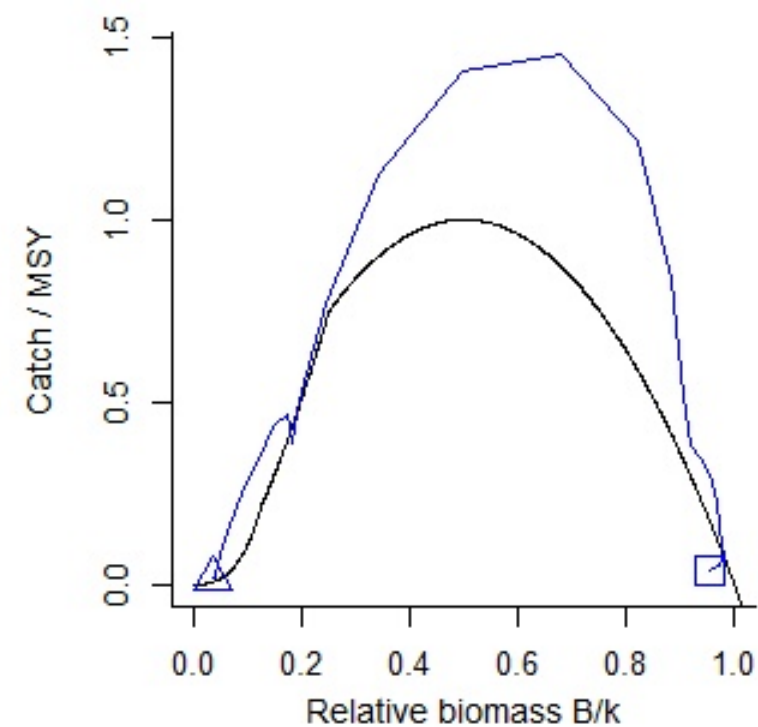



**Catch**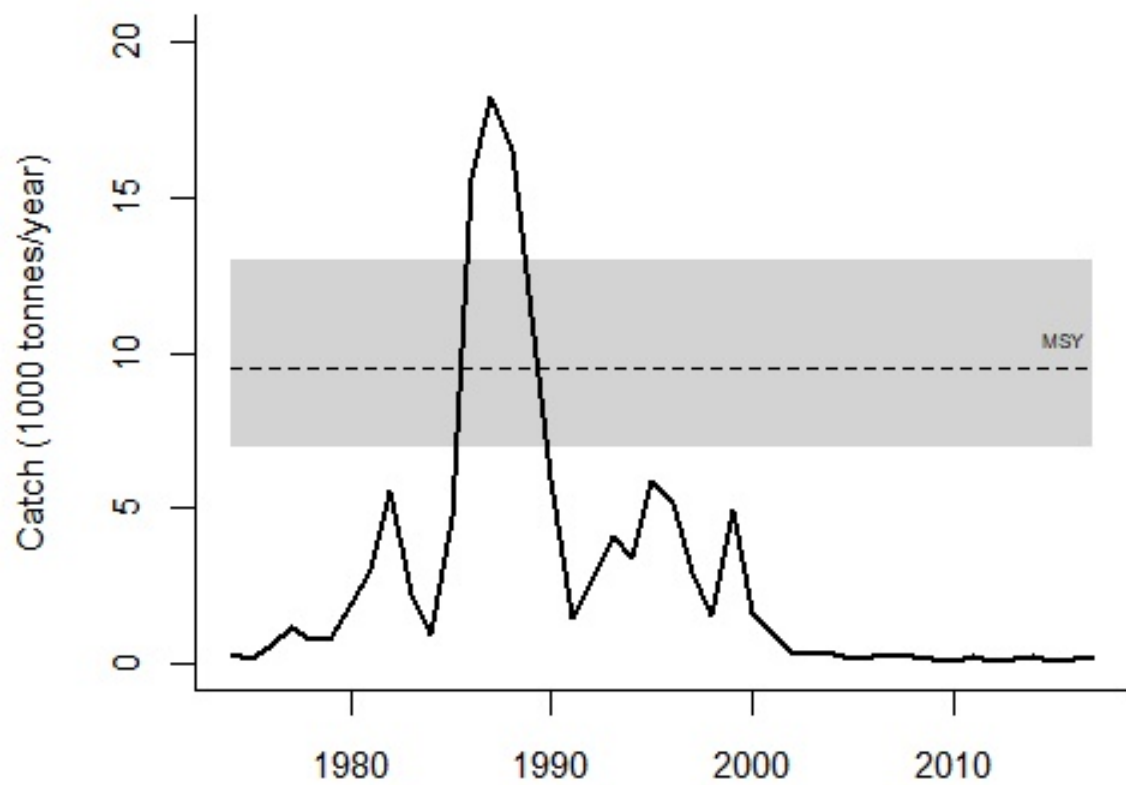**Stock size**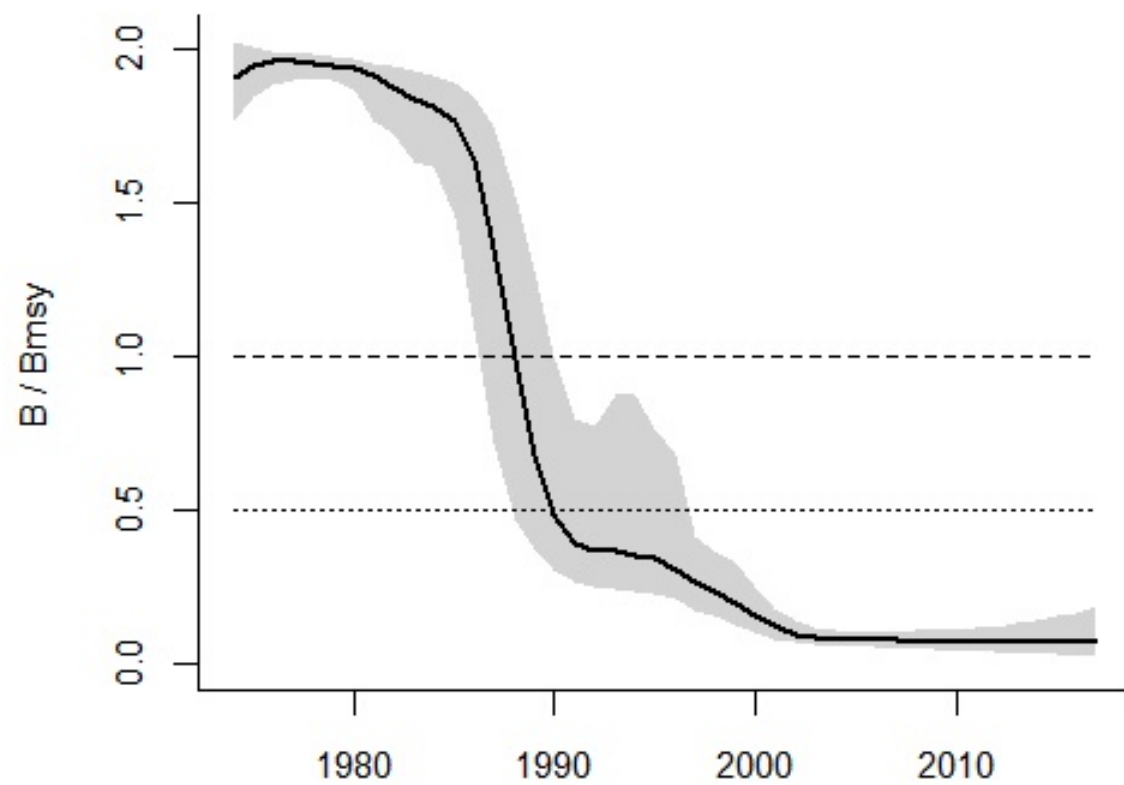**Exploitation**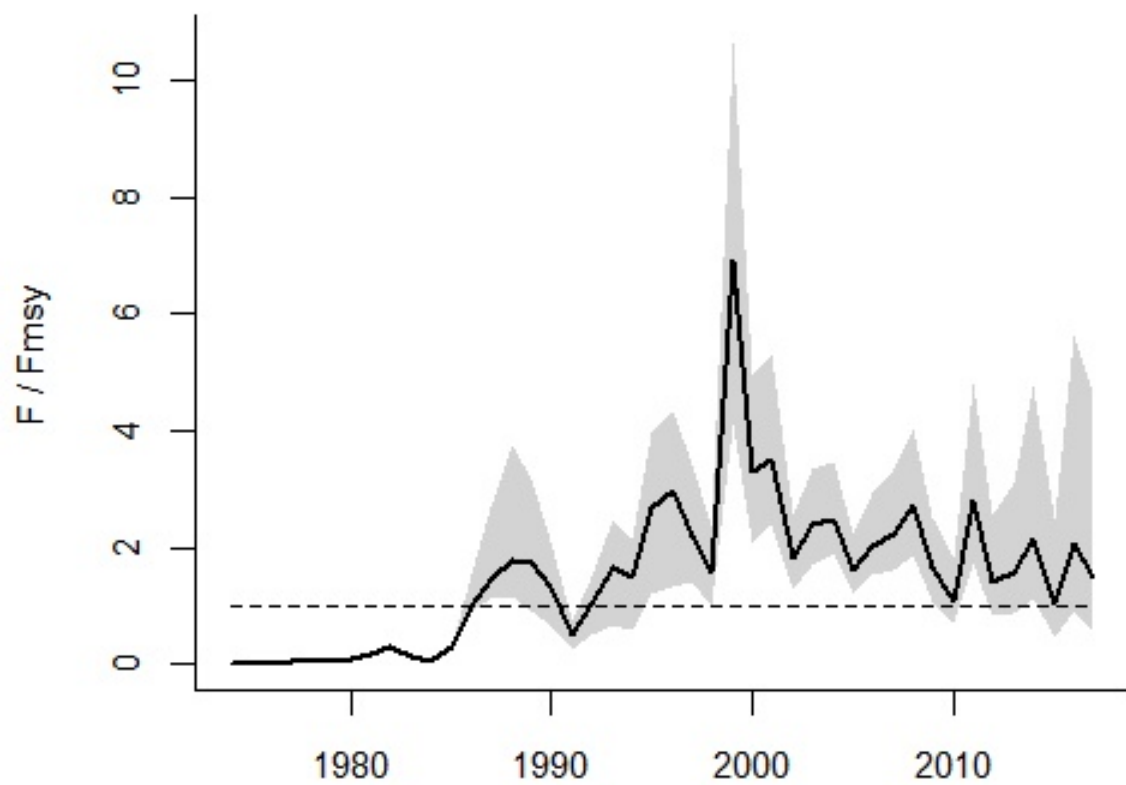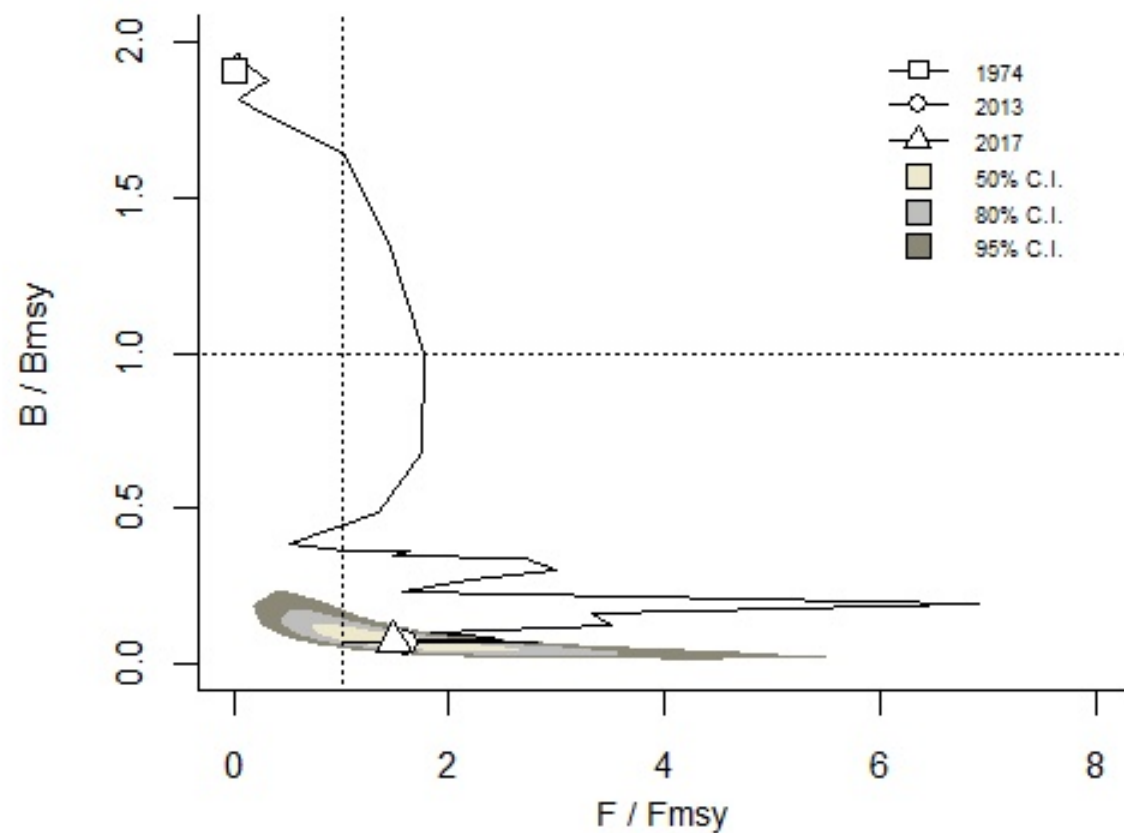

**A: Catch Mackerel\_MS**

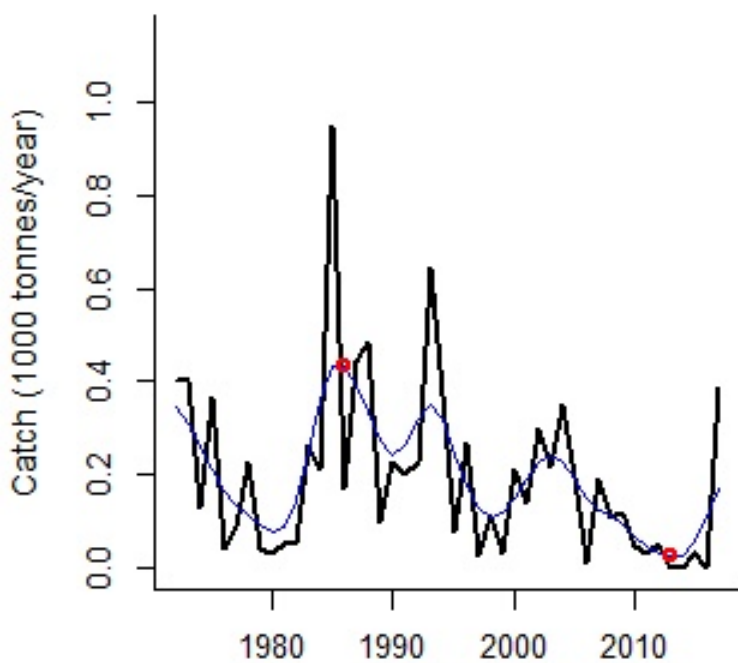

**B: Finding viable r-k**

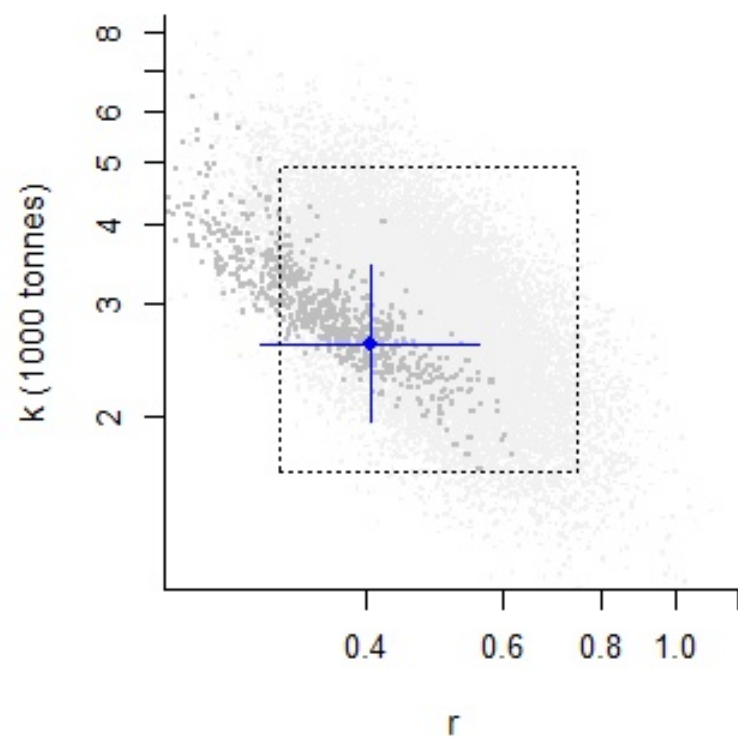

**C: Analysis of viable r-k**

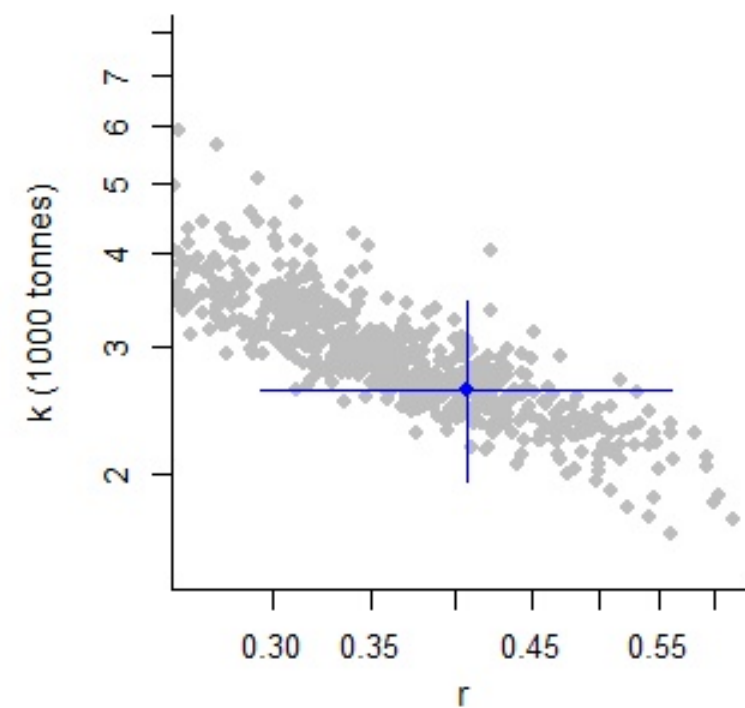

**D: Stock size**

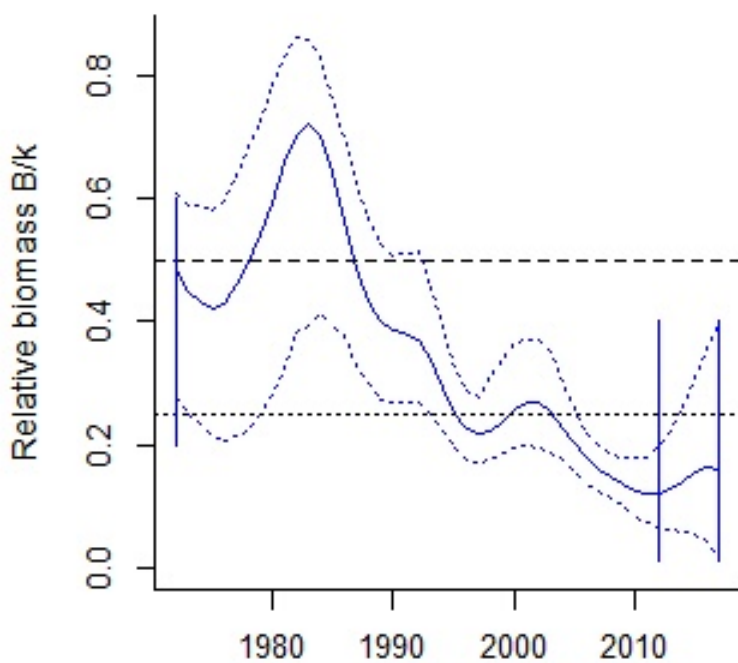

**E: Exploitation rate**

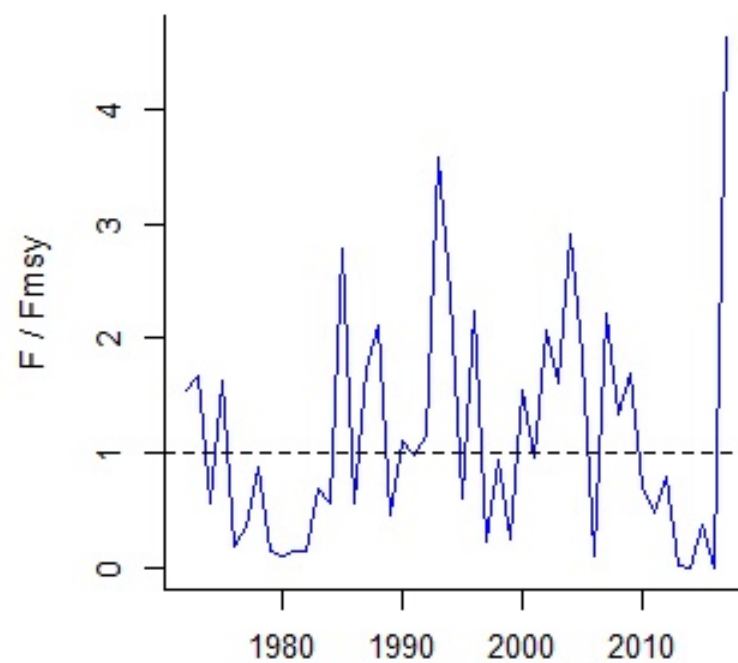

**F: Equilibrium curve**

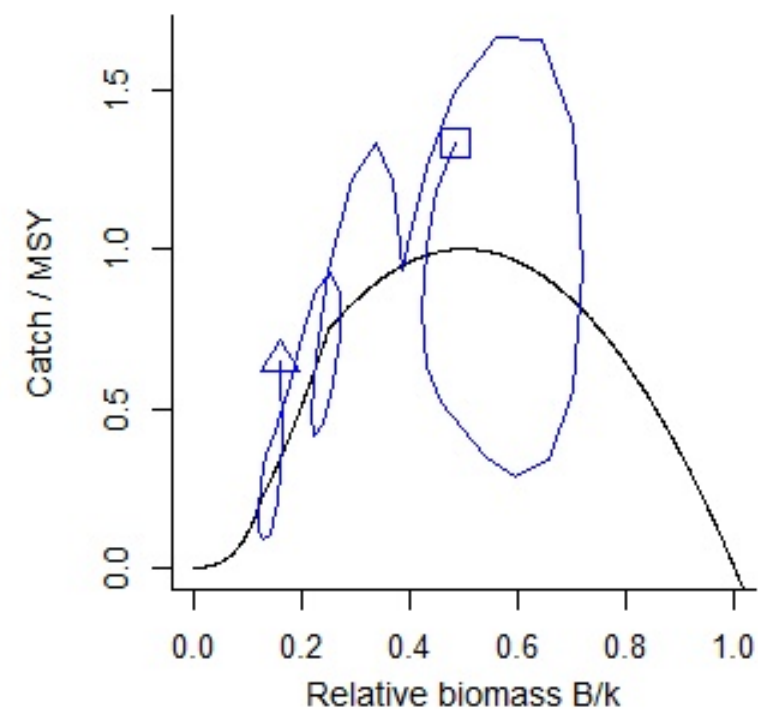

**Catch**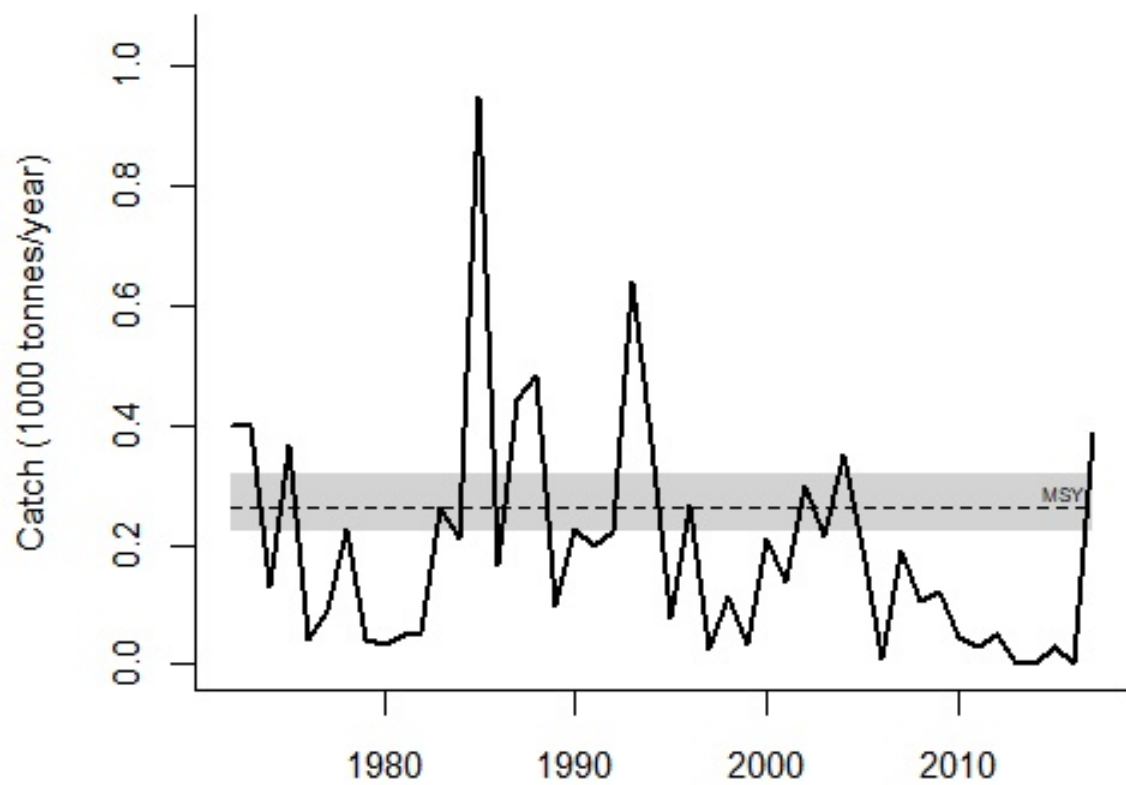**Stock size**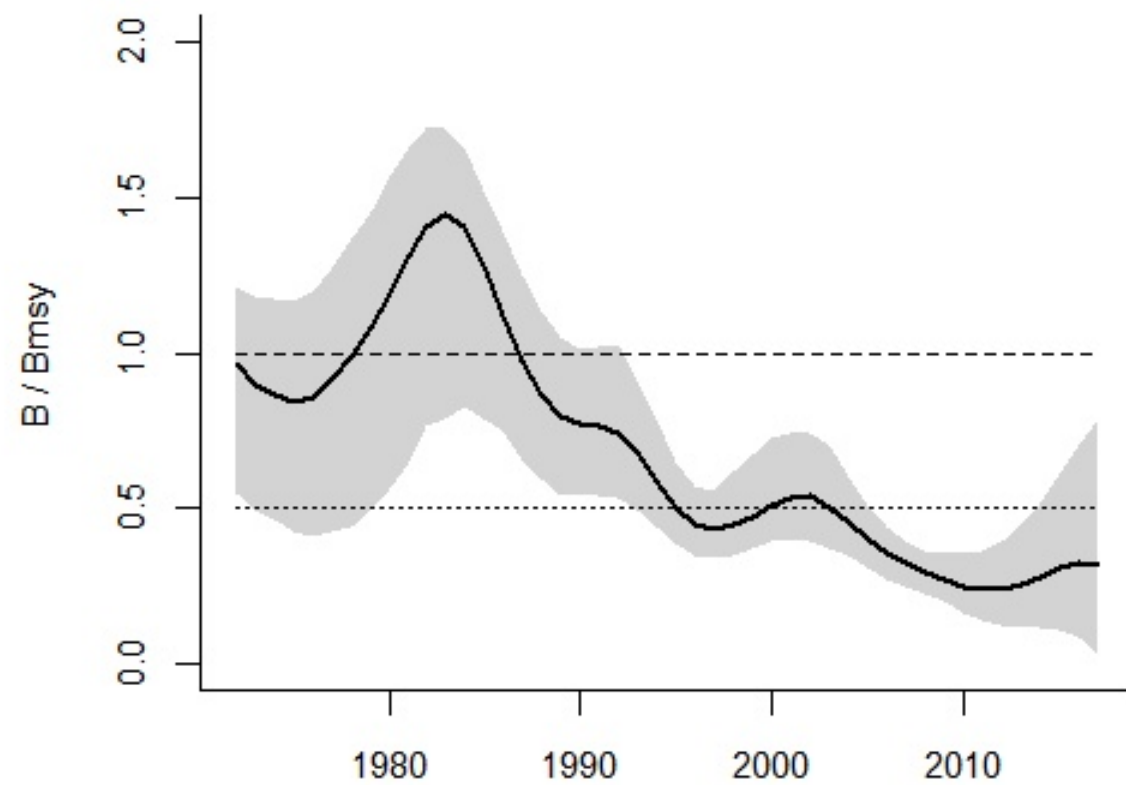**Exploitation**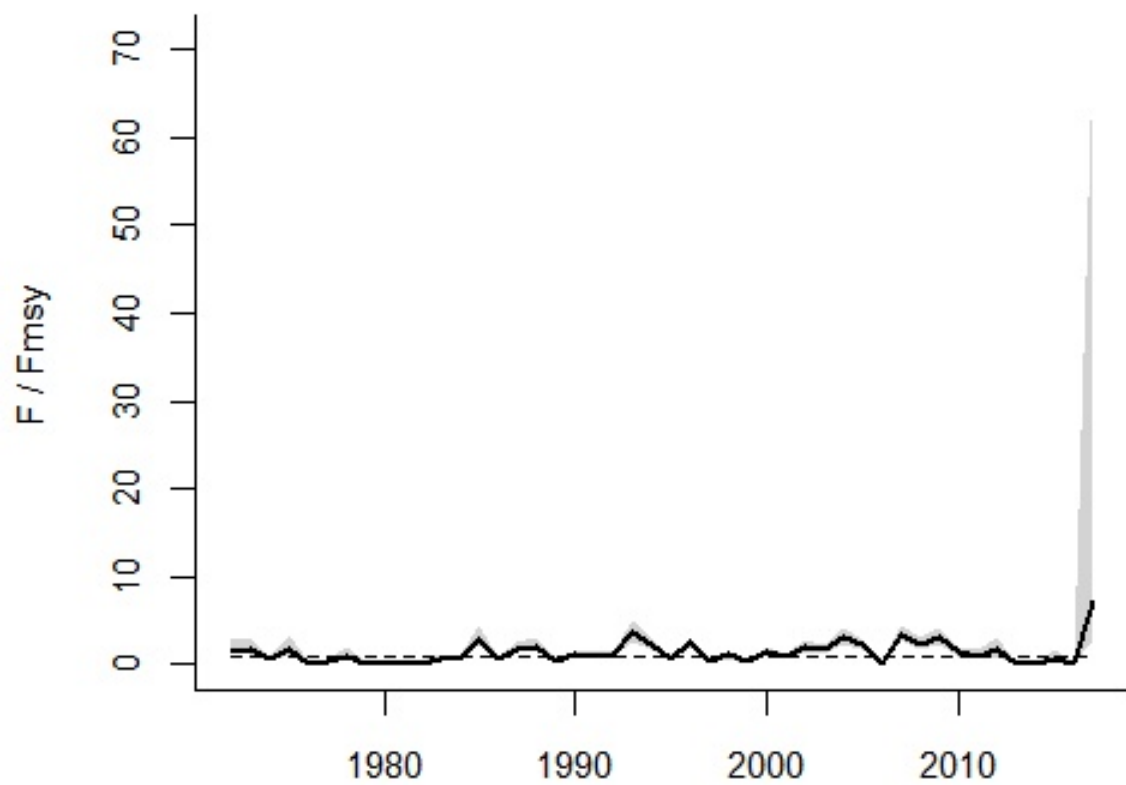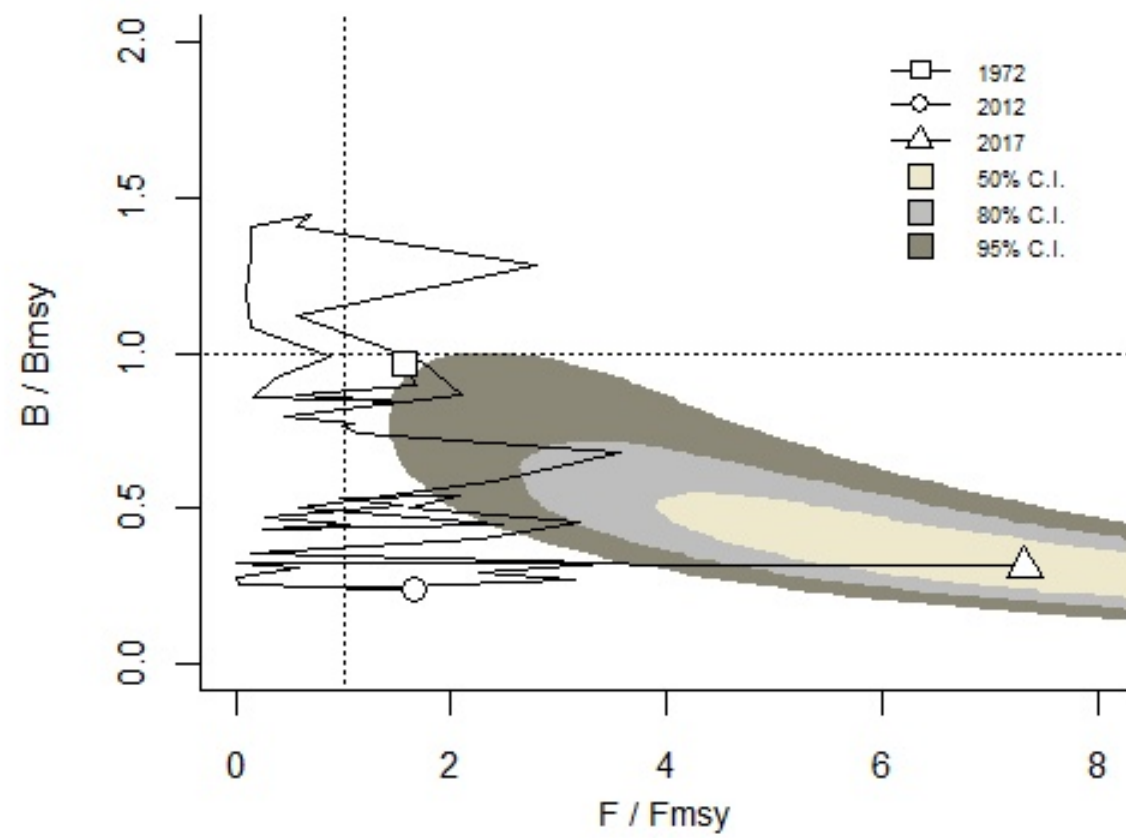

**A: Catch Bluefish\_MS**

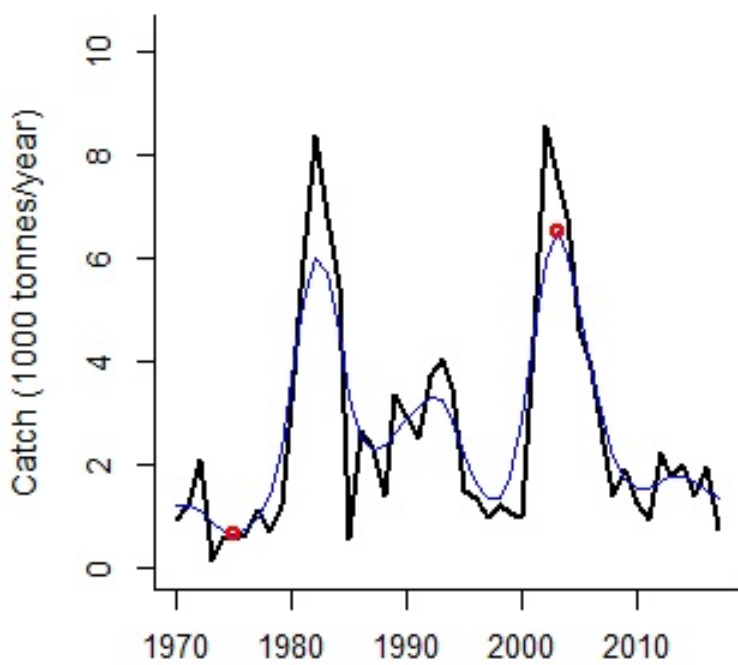

**B: Finding viable r-k**

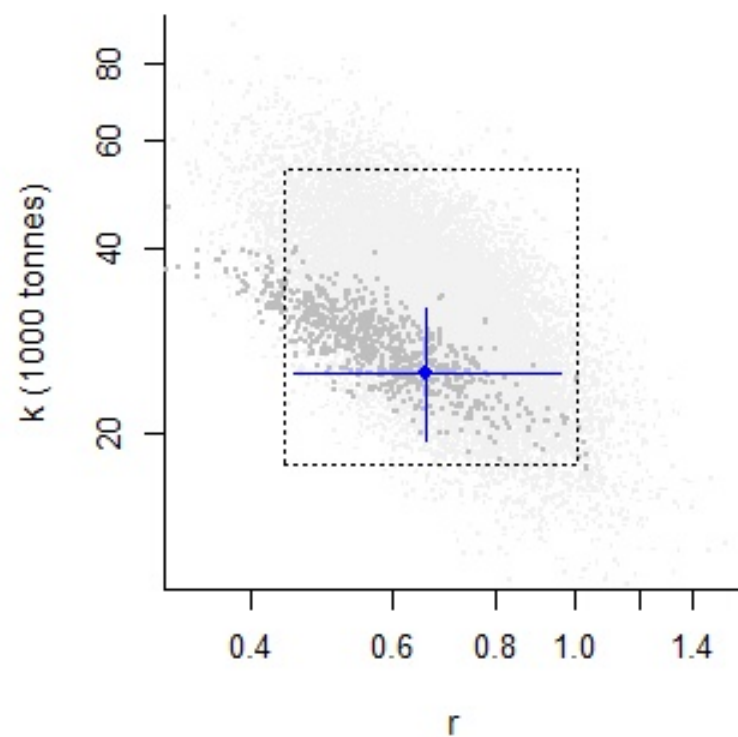

**C: Analysis of viable r-k**

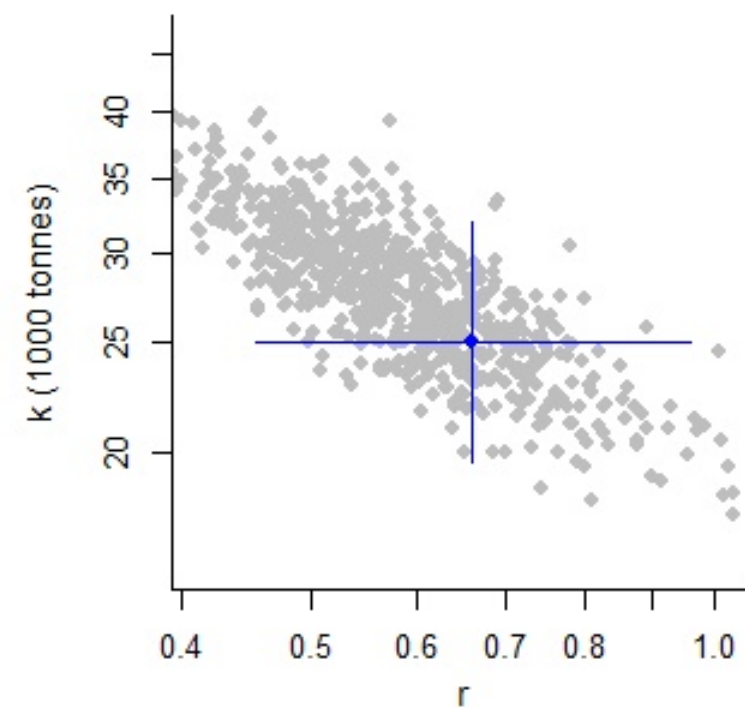

**D: Stock size**

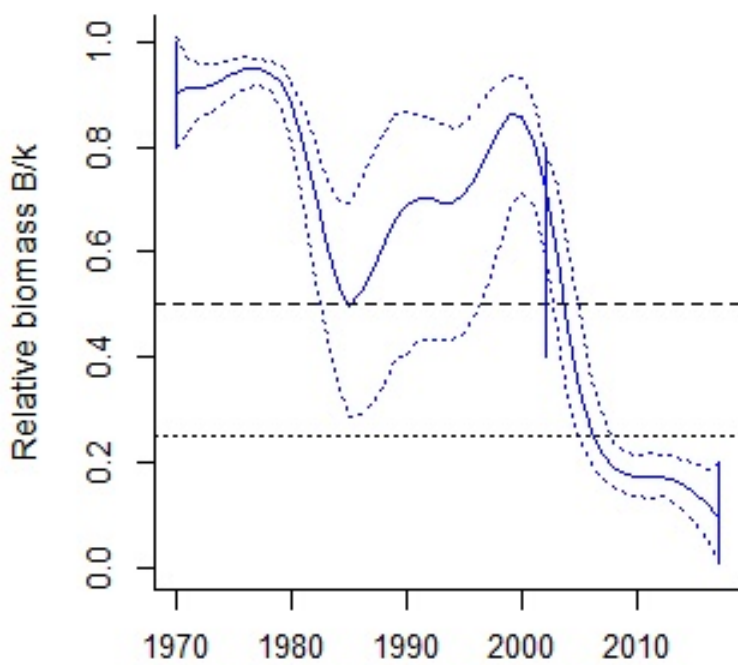

**E: Exploitation rate**

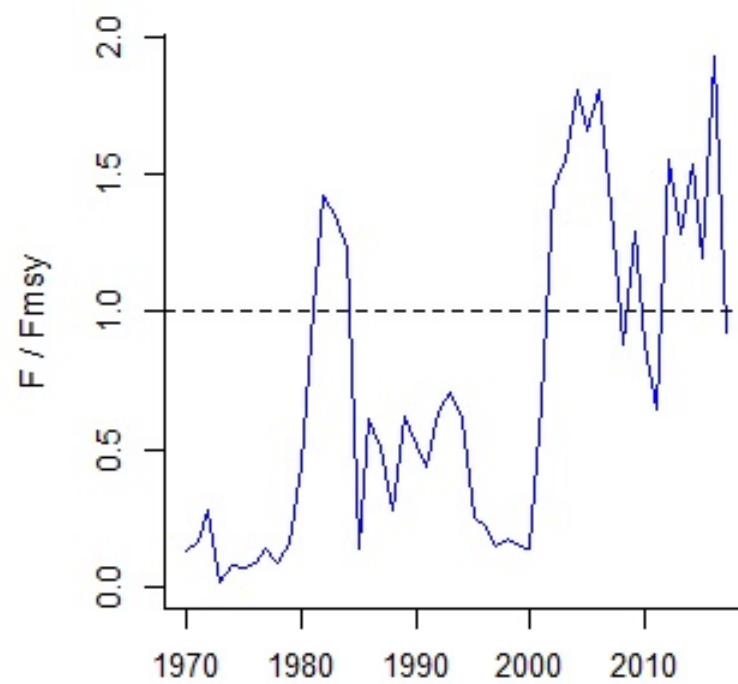

**F: Equilibrium curve**

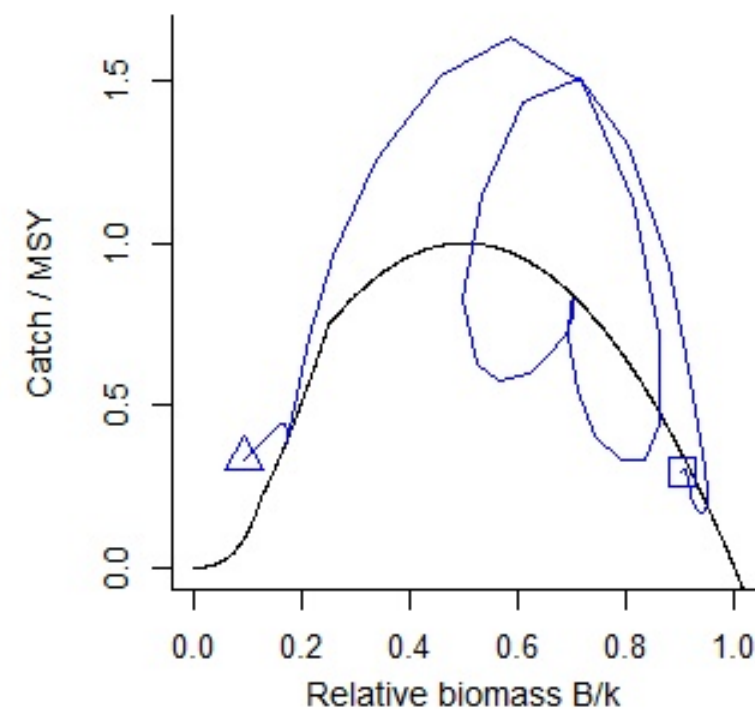



**Catch**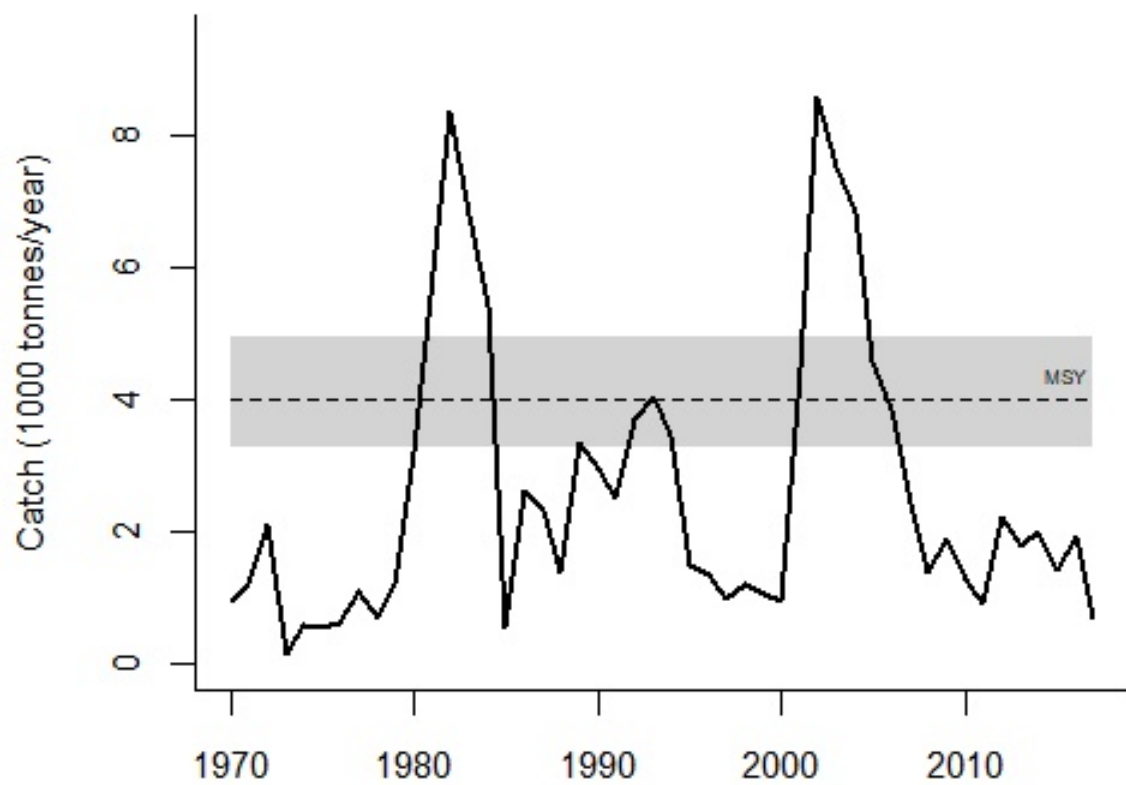**Stock size**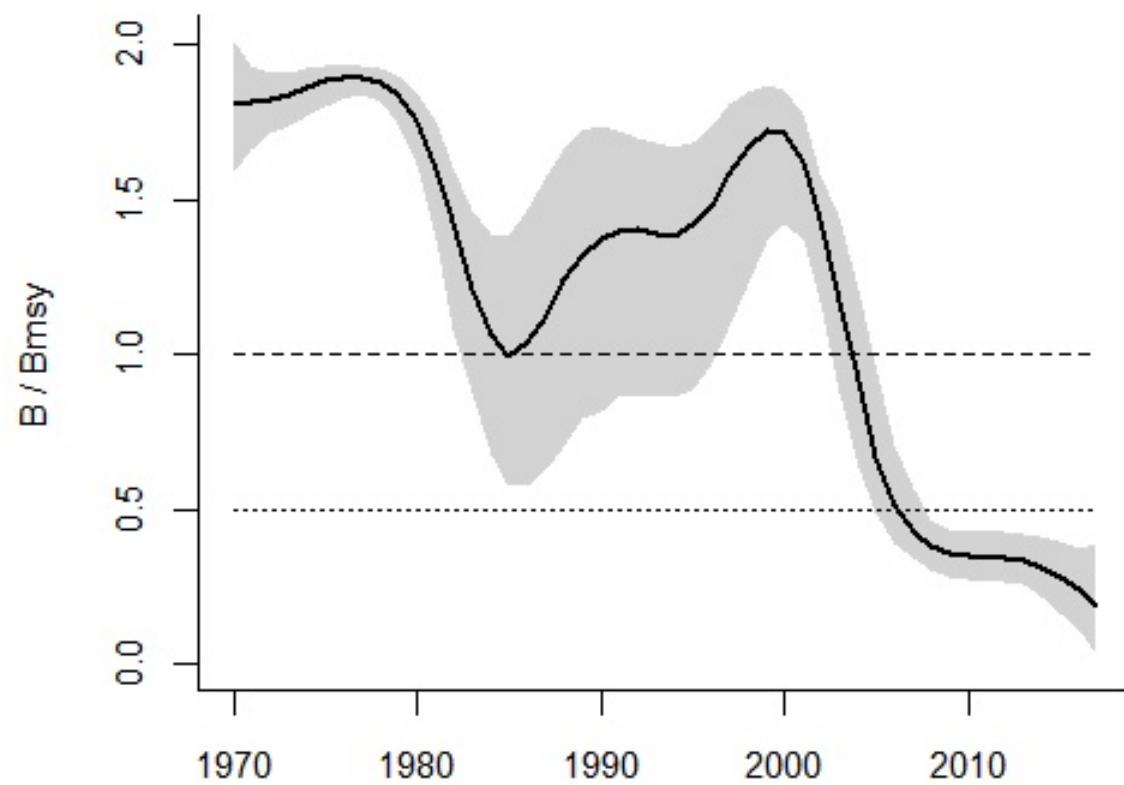**Exploitation**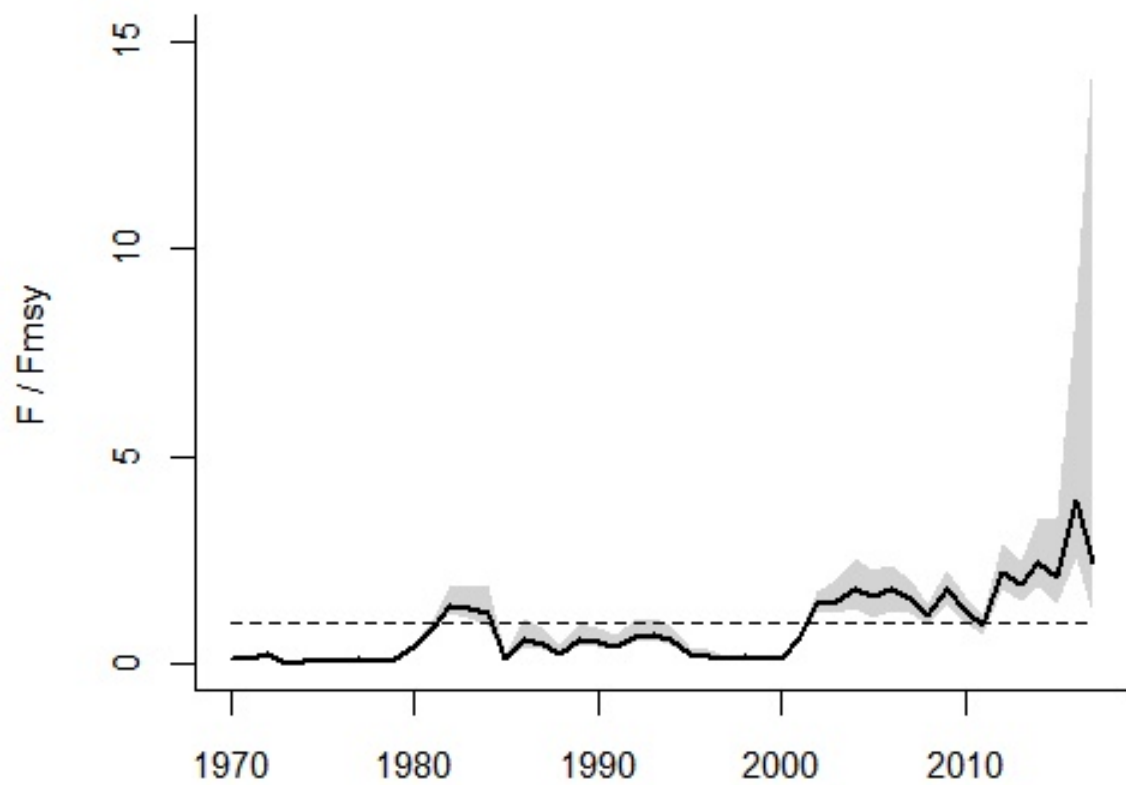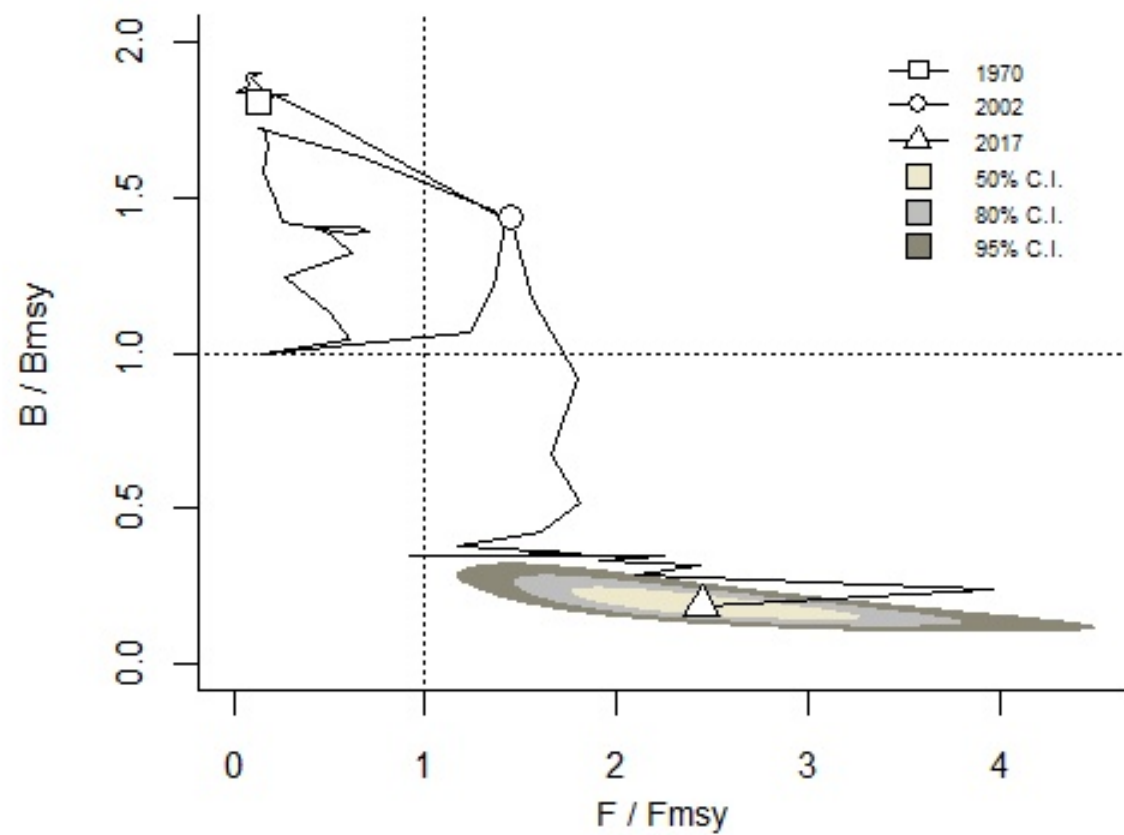

**A: Catch Bonito\_MS**

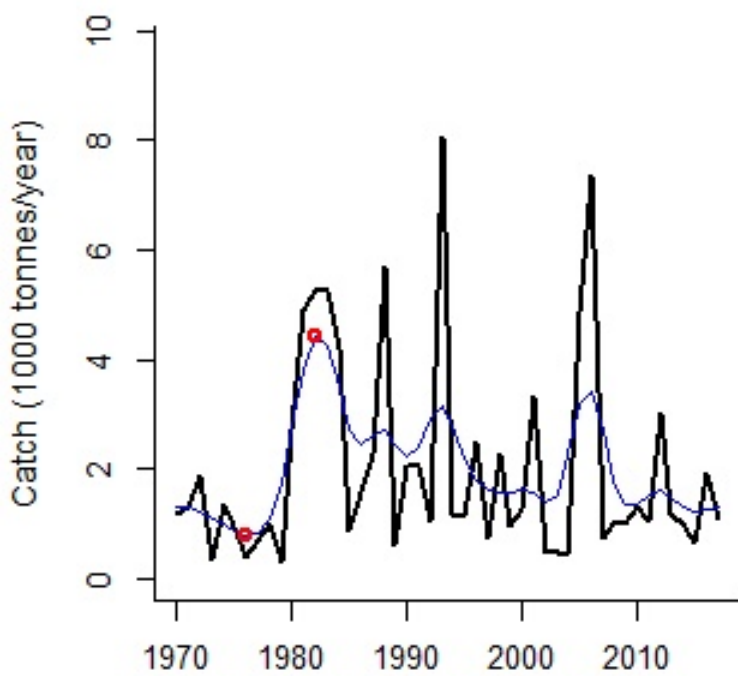

**B: Finding viable r-k**

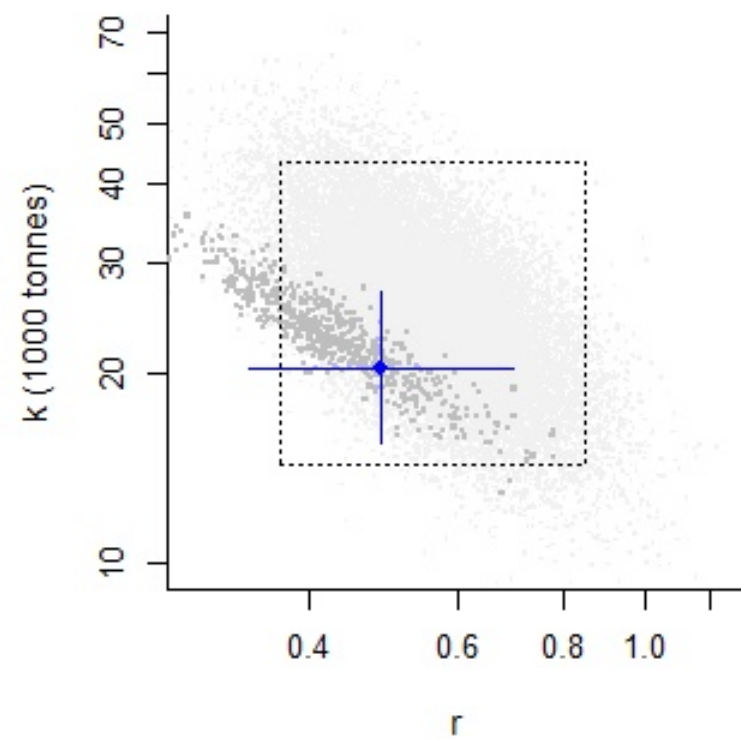

**C: Analysis of viable r-k**

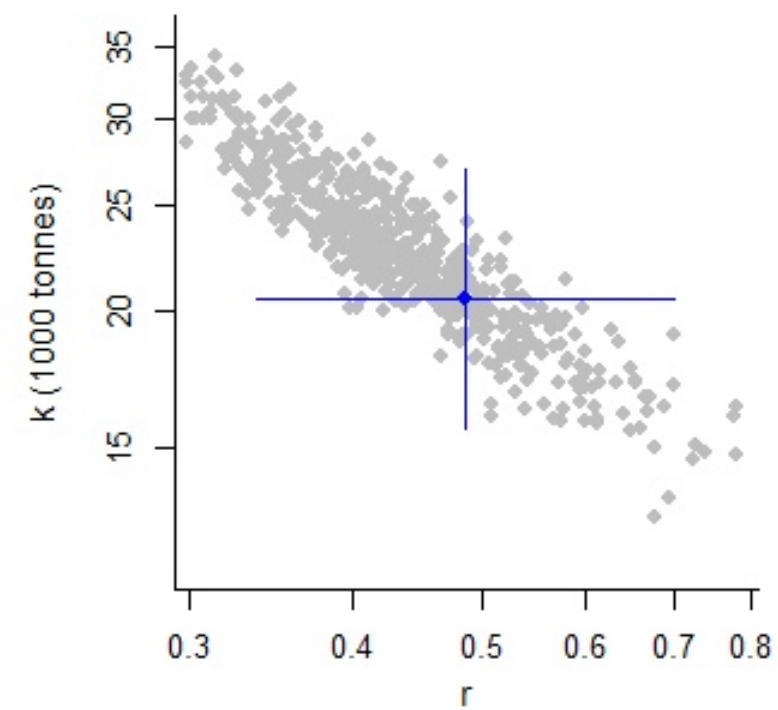

**D: Stock size**

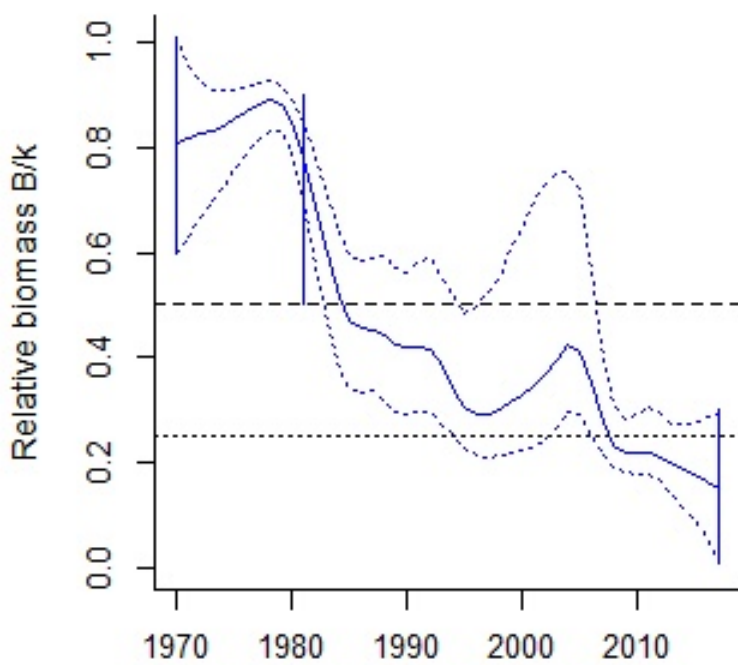

**E: Exploitation rate**

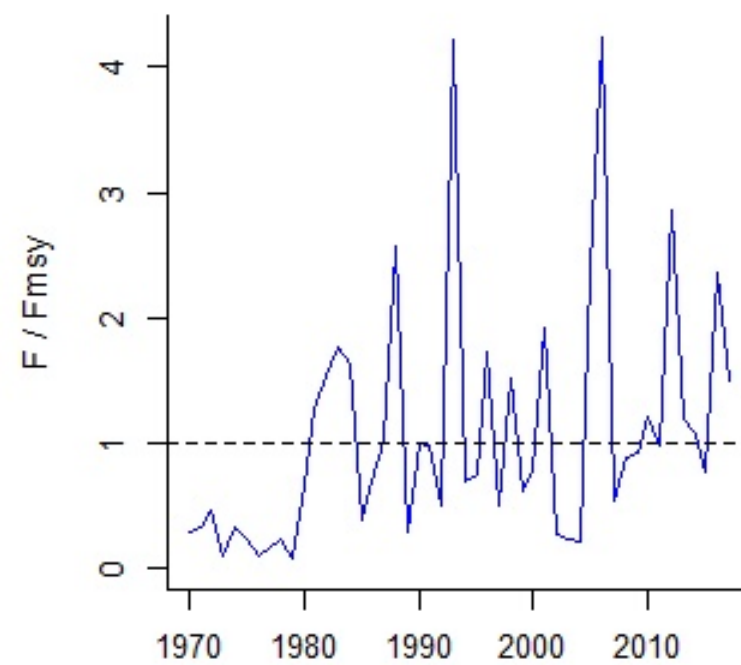

**F: Equilibrium curve**

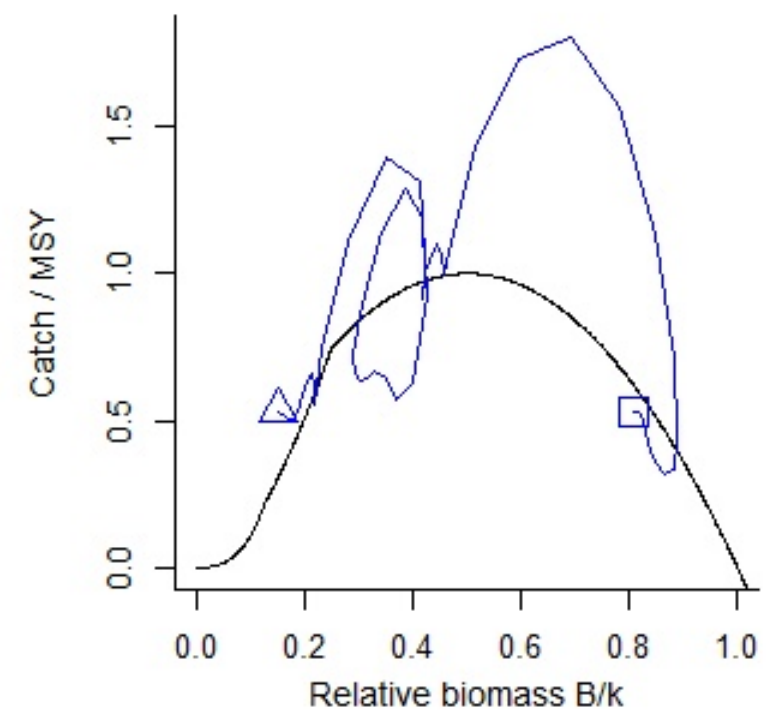

**Catch**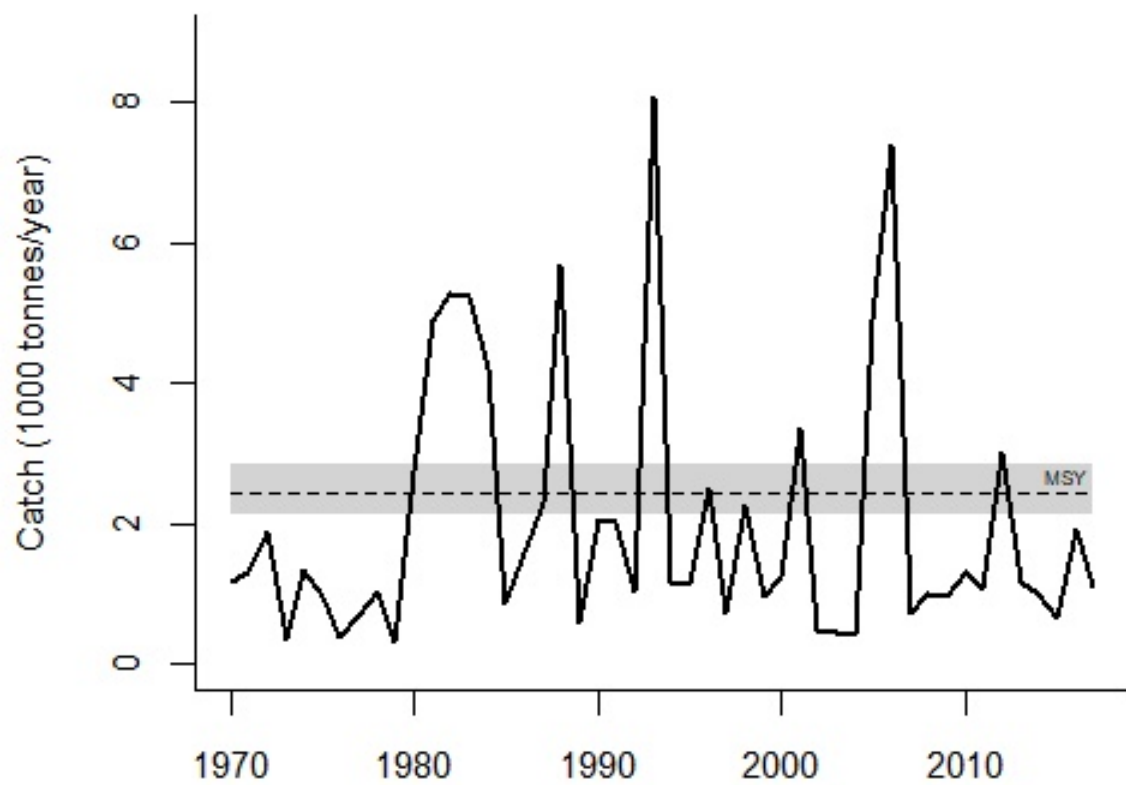**Stock size**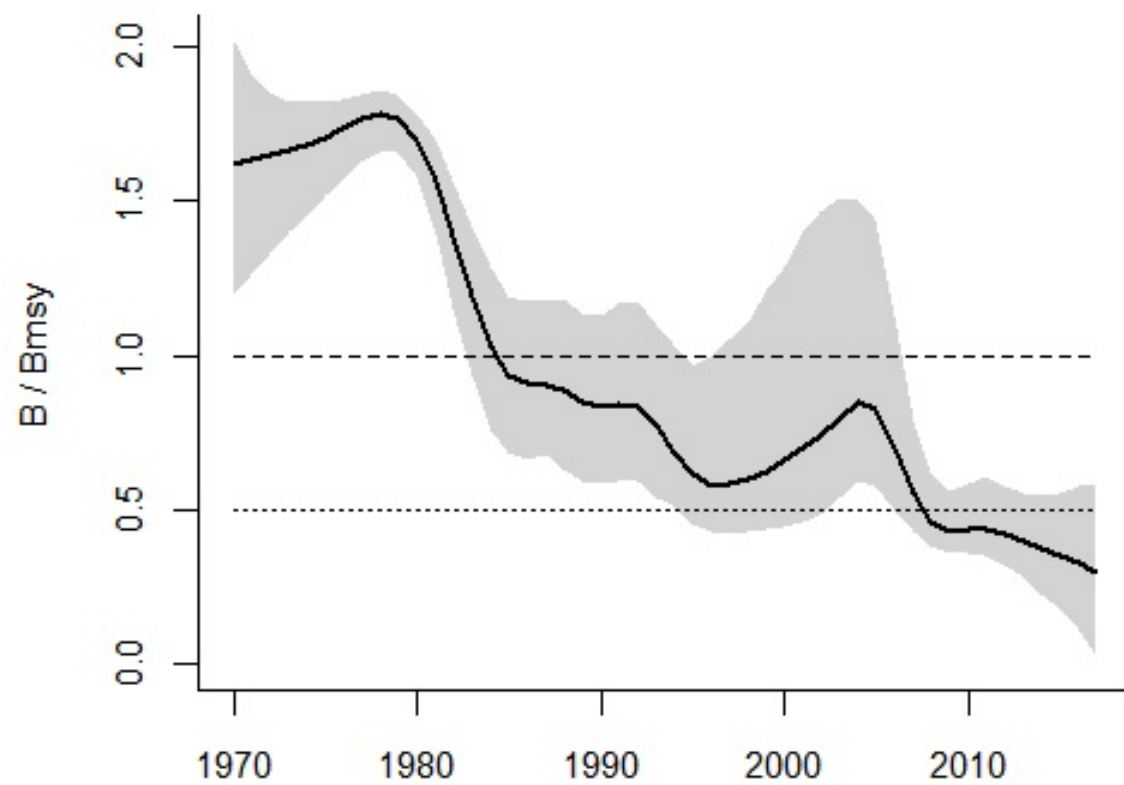**Exploitation**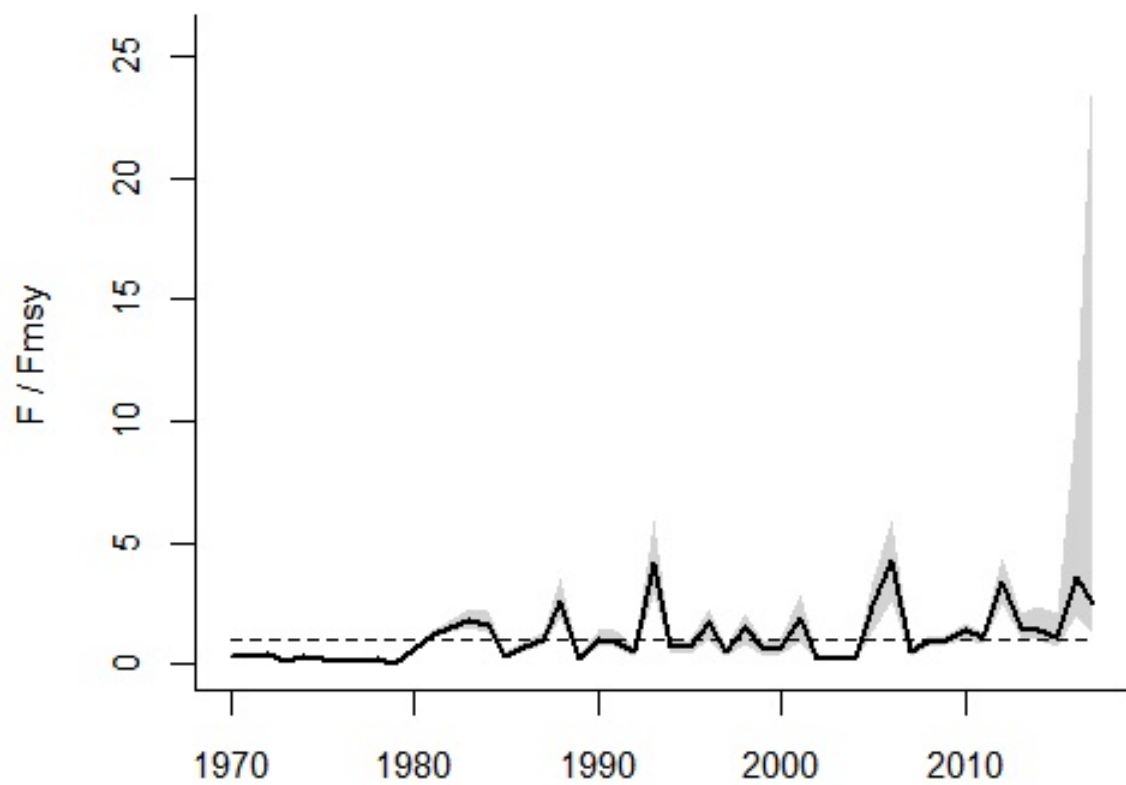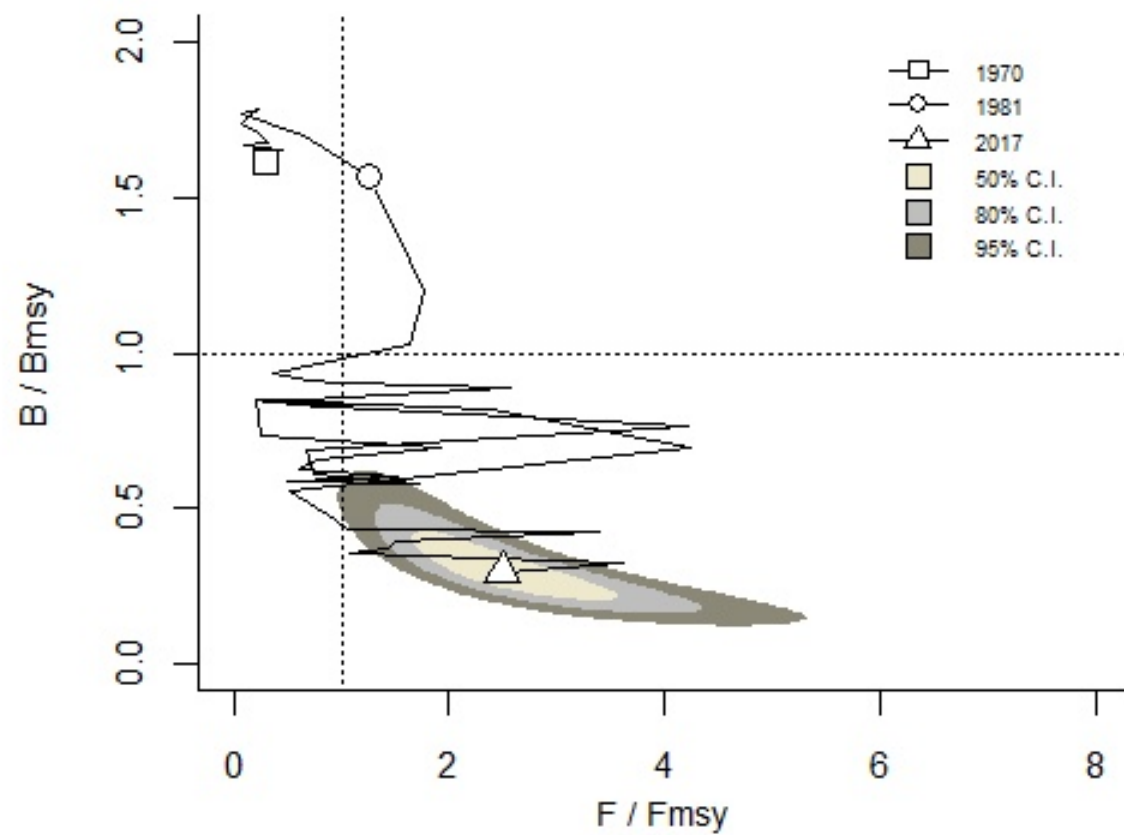

**A: Catch Whiting\_MS**

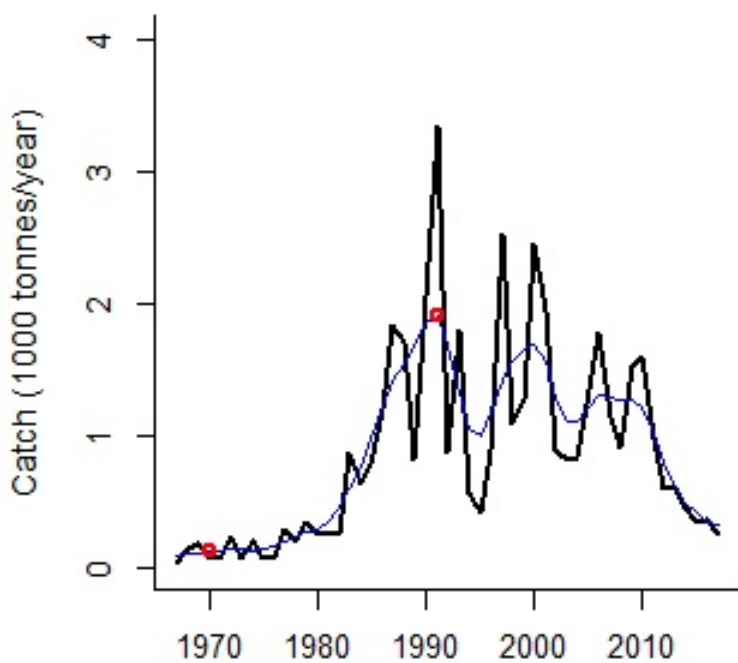

**B: Finding viable r-k**

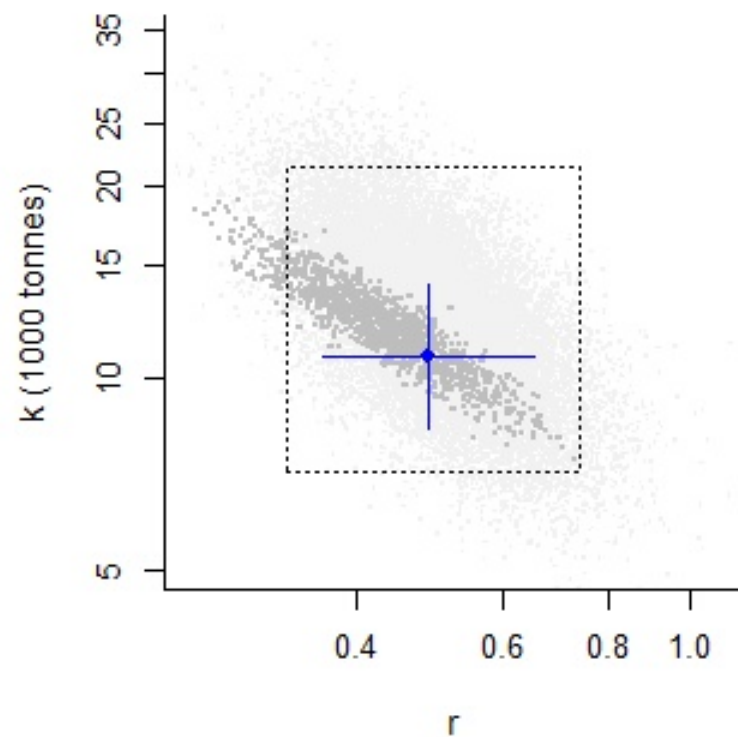

**C: Analysis of viable r-k**

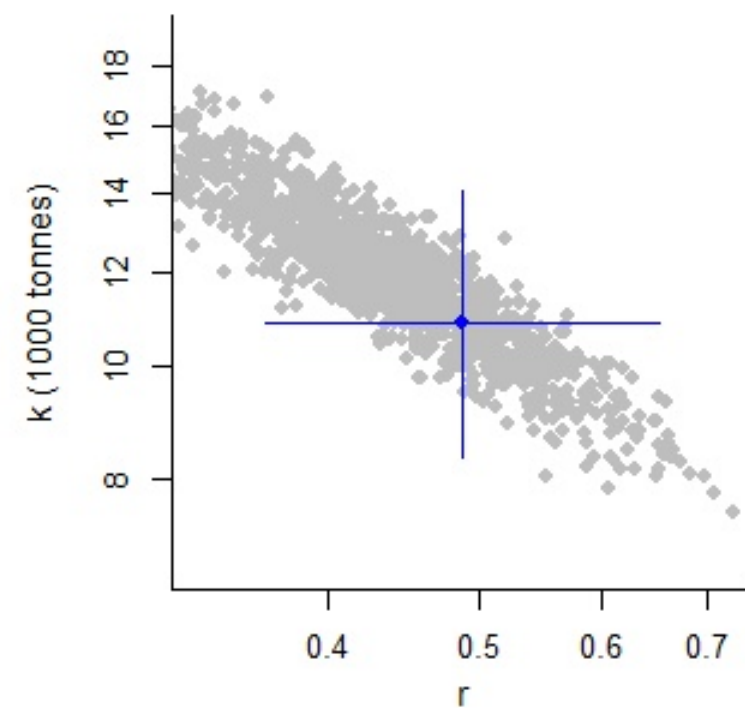

**D: Stock size**

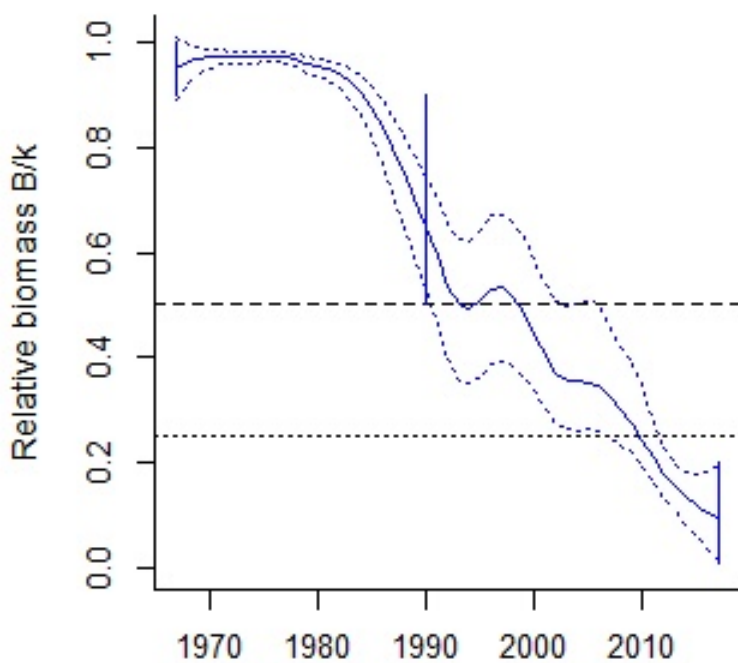

**E: Exploitation rate**

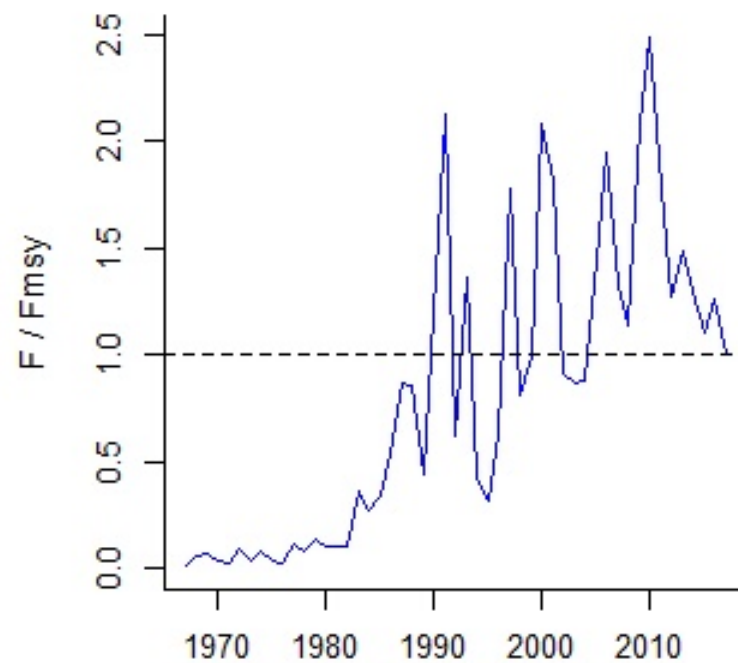

**F: Equilibrium curve**

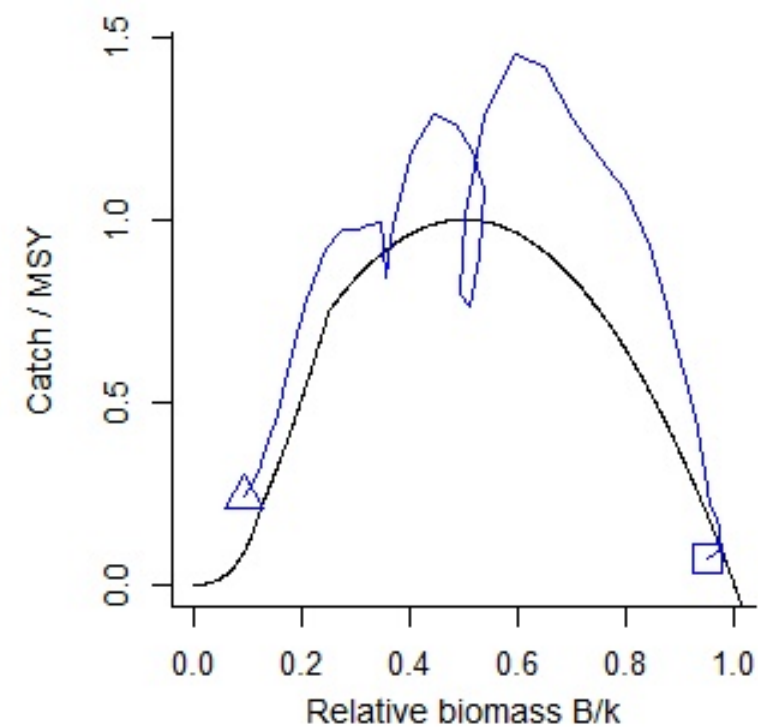



**Catch**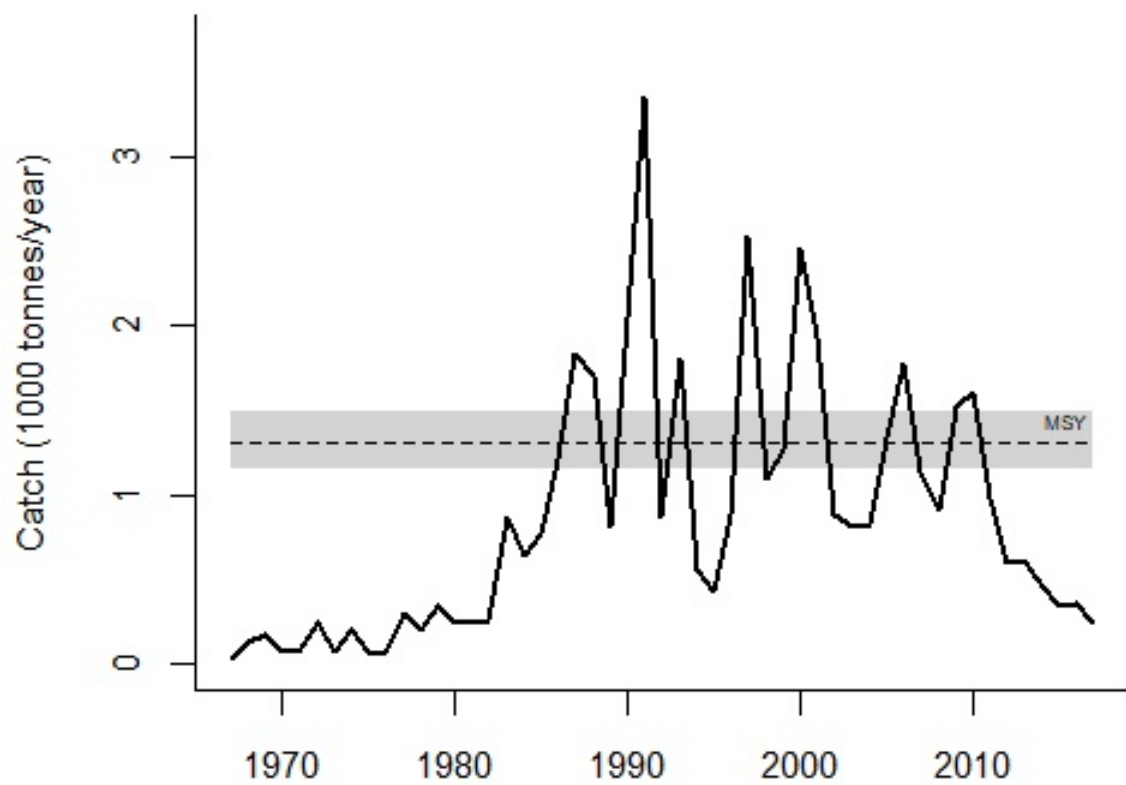**Stock size**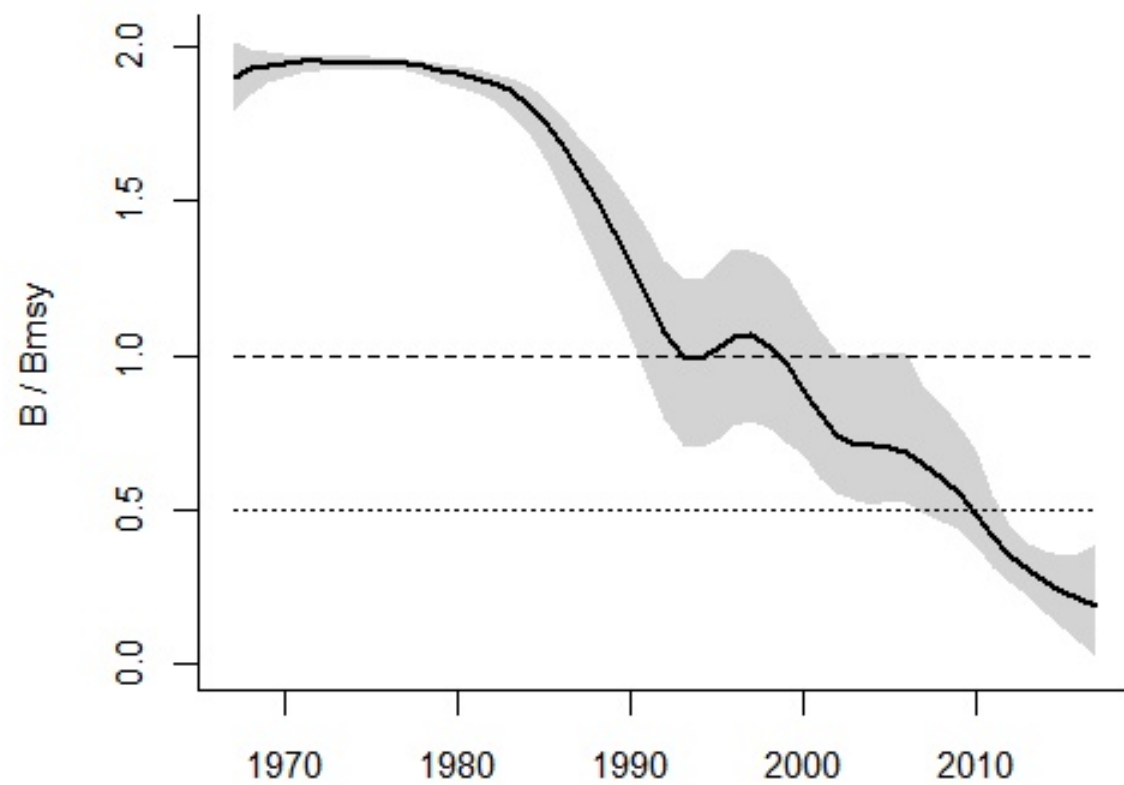**Exploitation**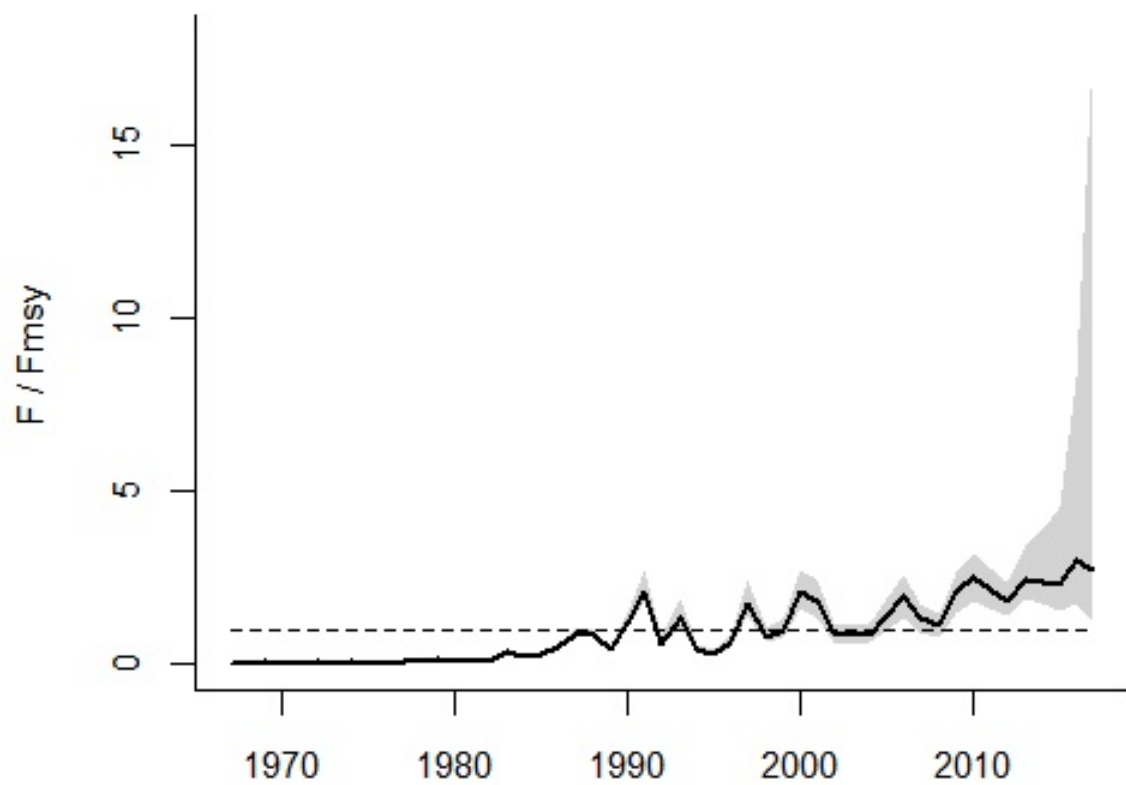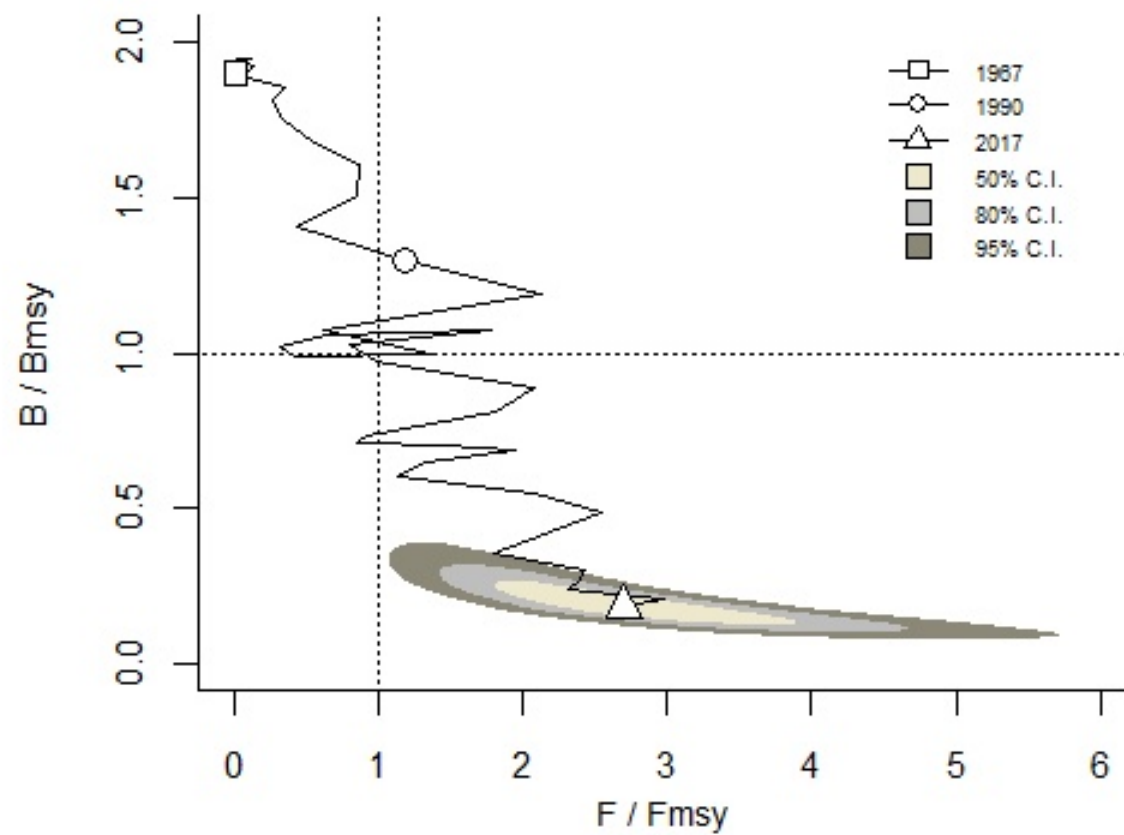

**A: Catch Hake\_MS**

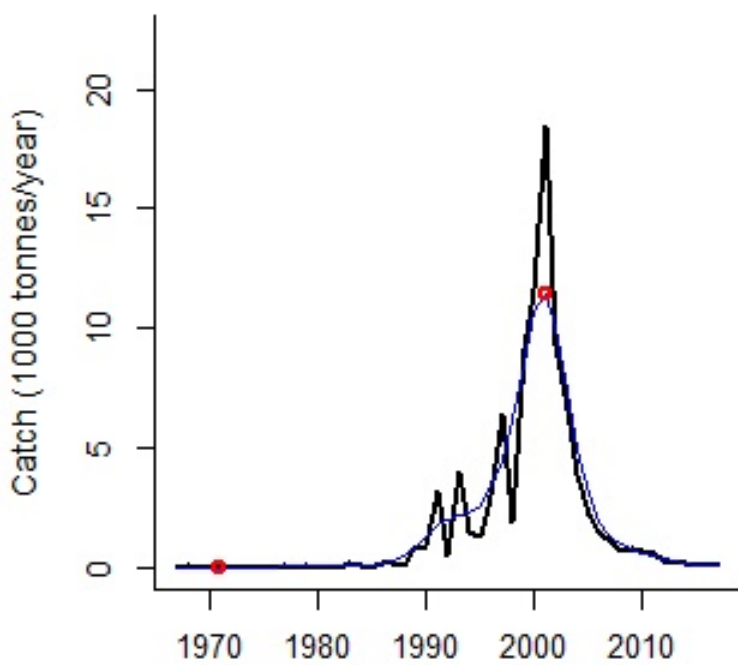

**B: Finding viable r-k**

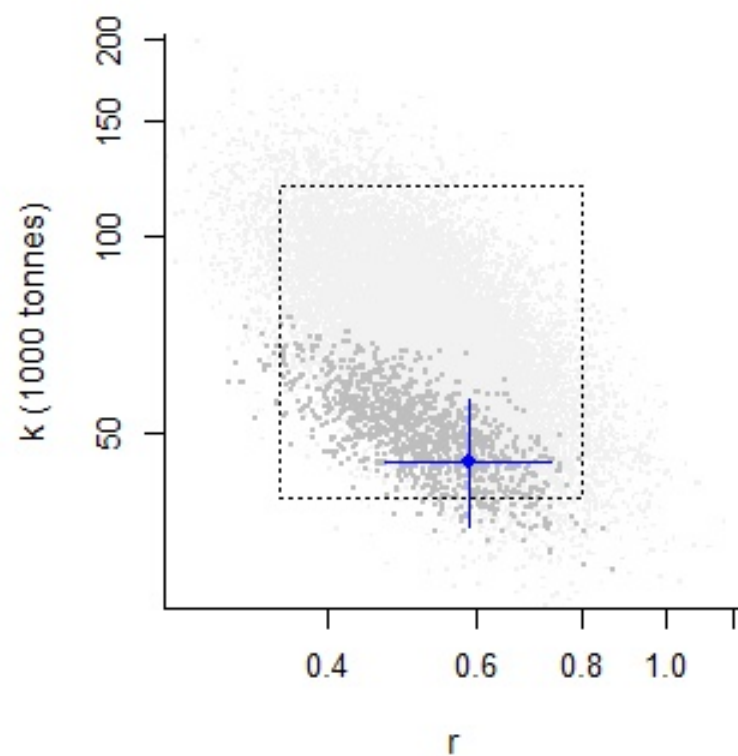

**C: Analysis of viable r-k**

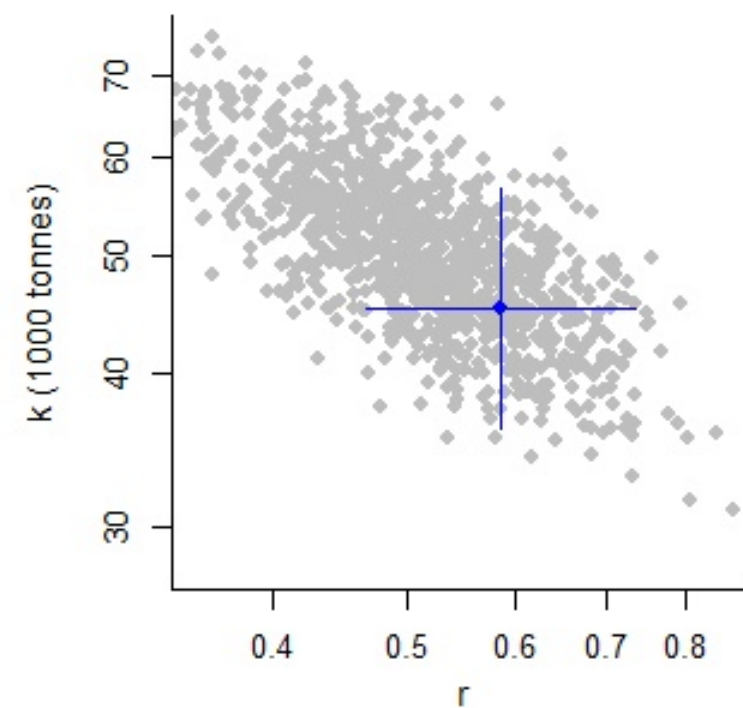

**D: Stock size**

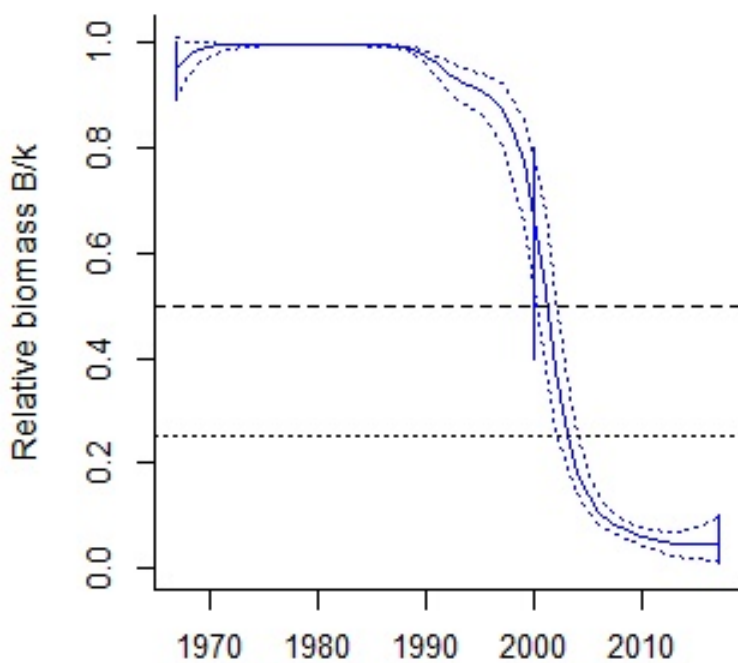

**E: Exploitation rate**

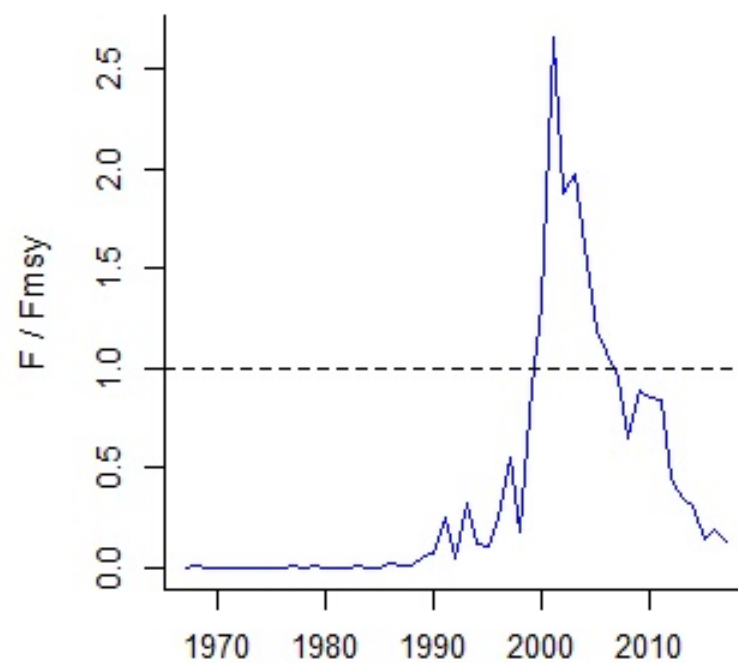

**F: Equilibrium curve**

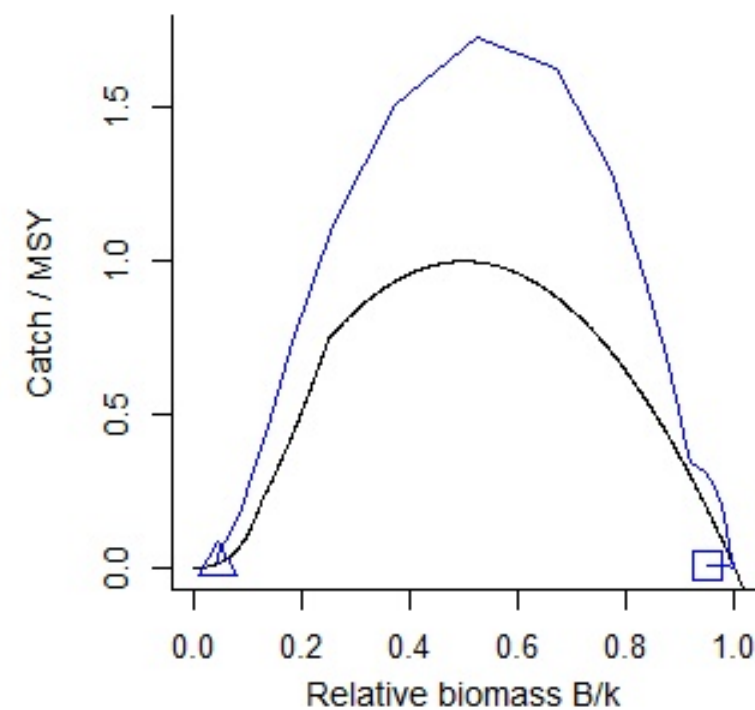

**Catch**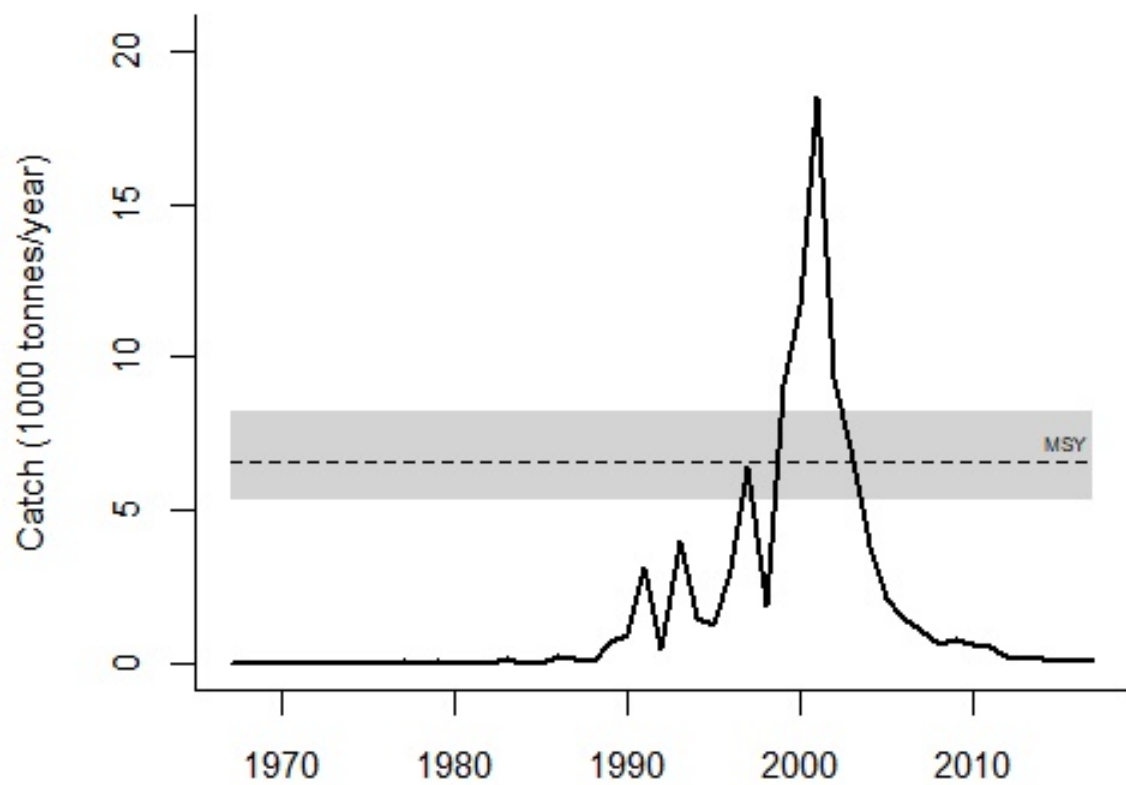**Stock size**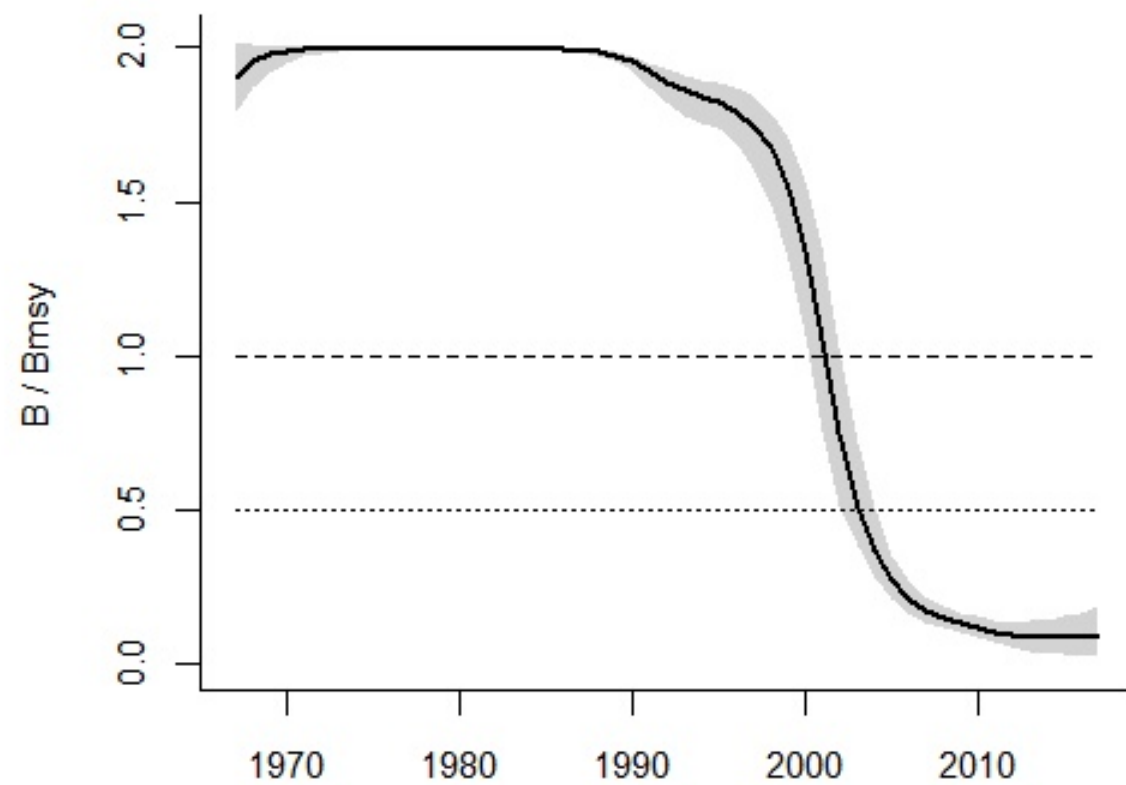**Exploitation**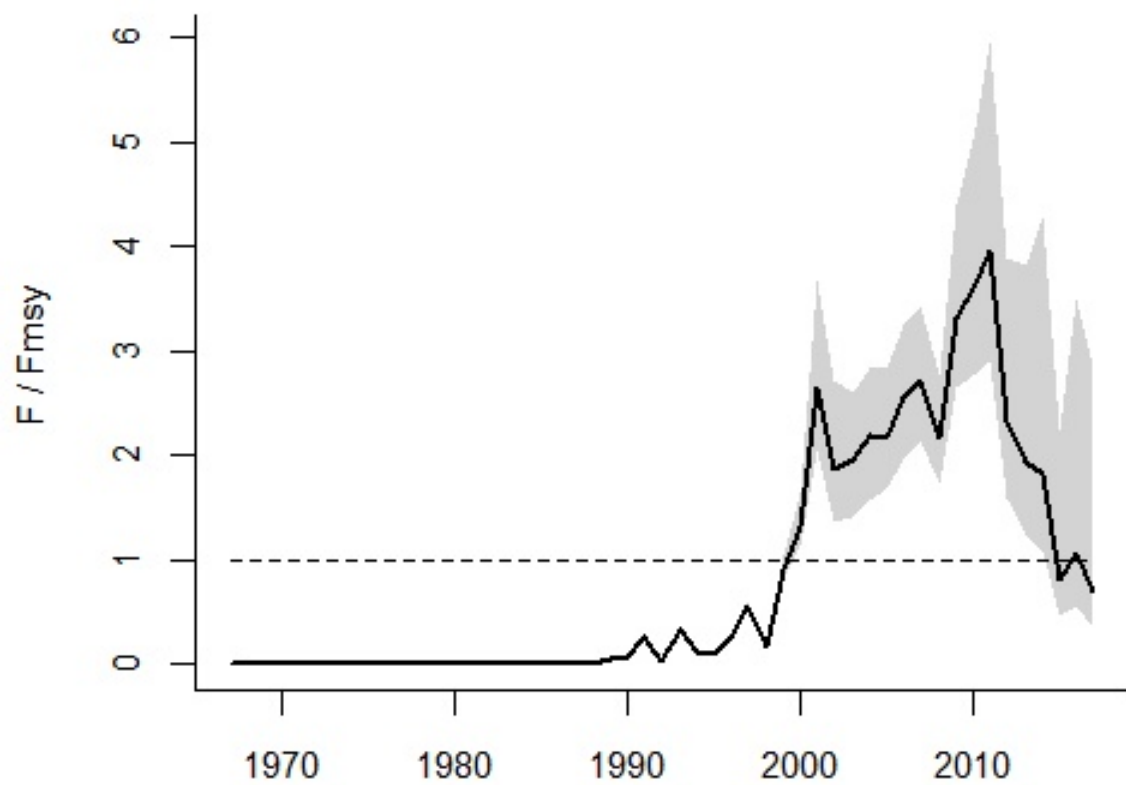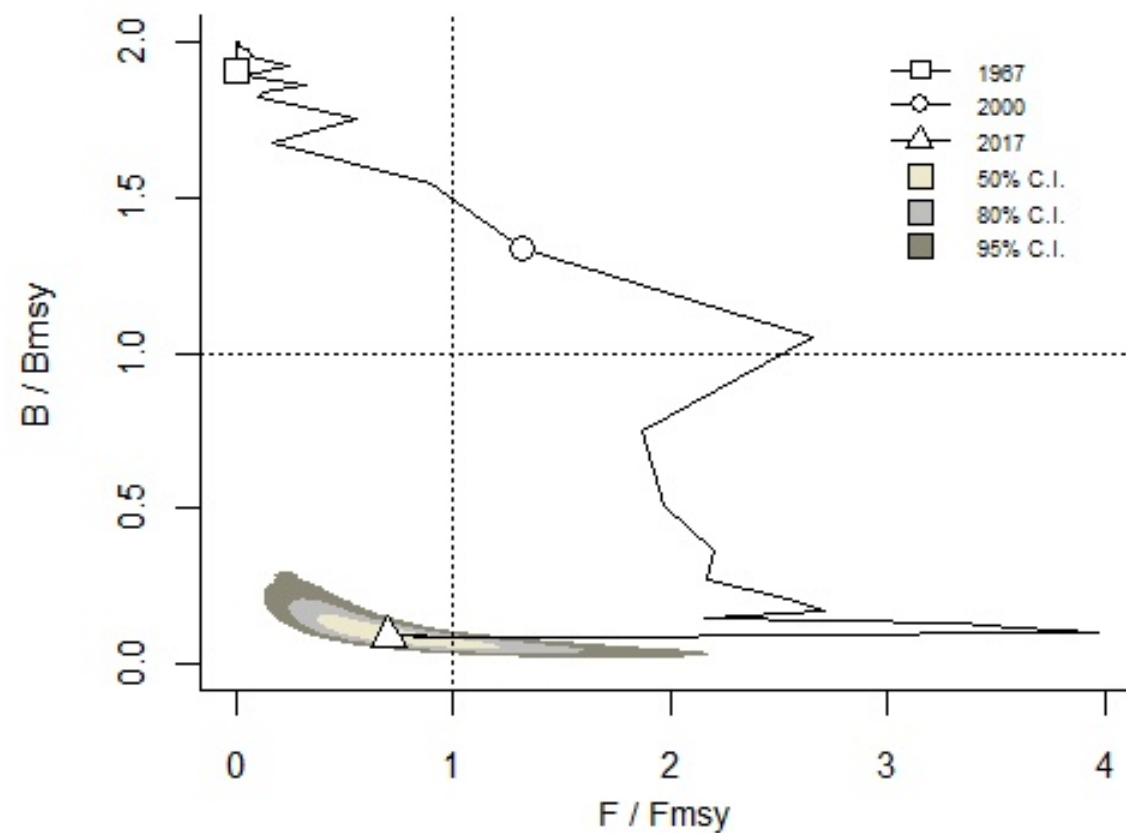

**A: Catch Turbot\_MS**

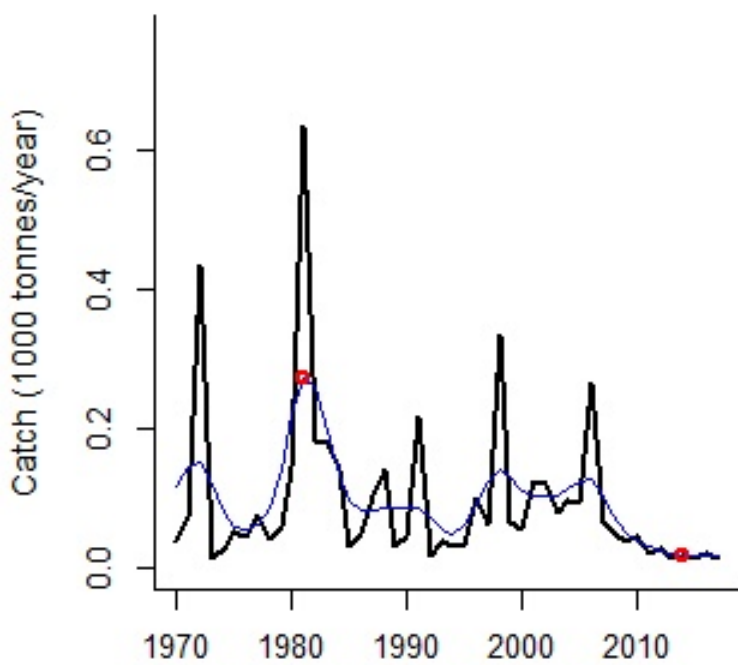

**B: Finding viable r-k**

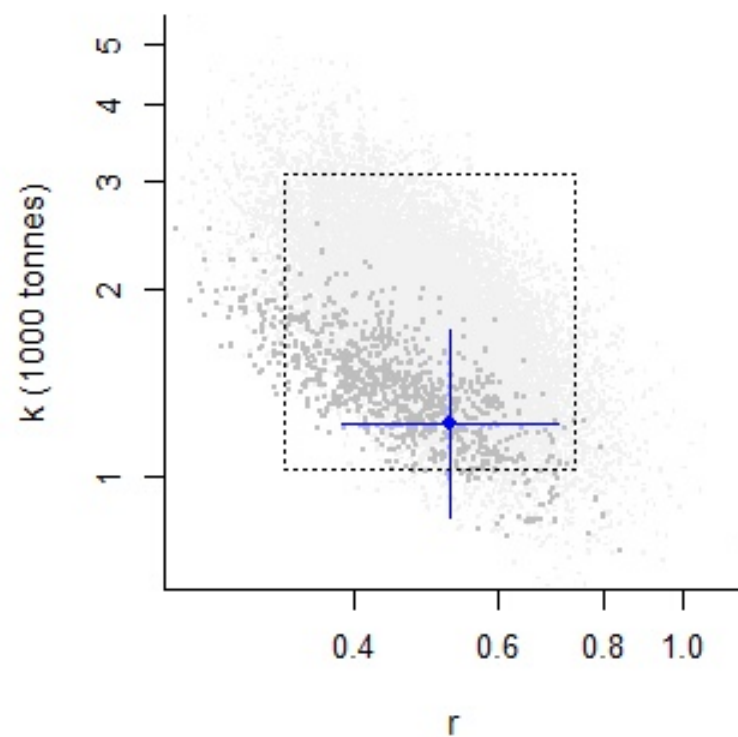

**C: Analysis of viable r-k**

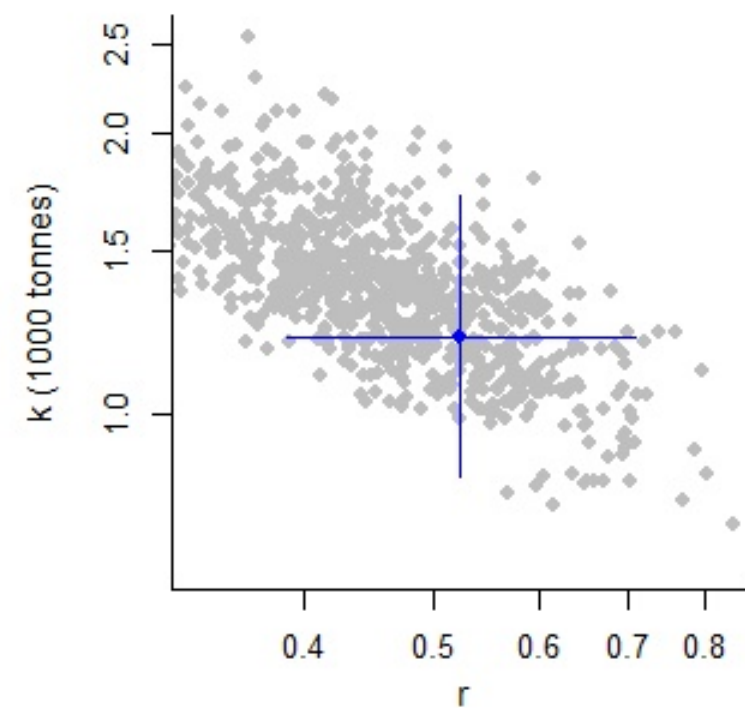

**D: Stock size**

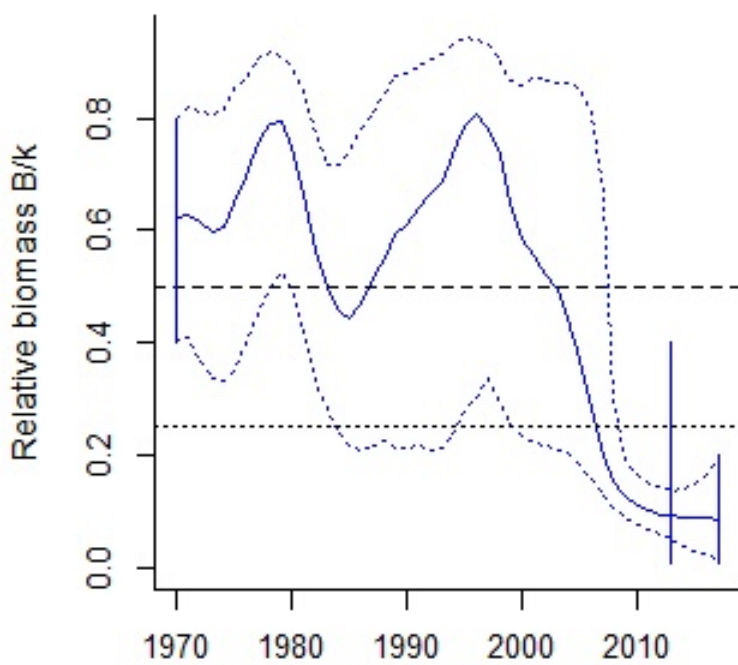

**E: Exploitation rate**

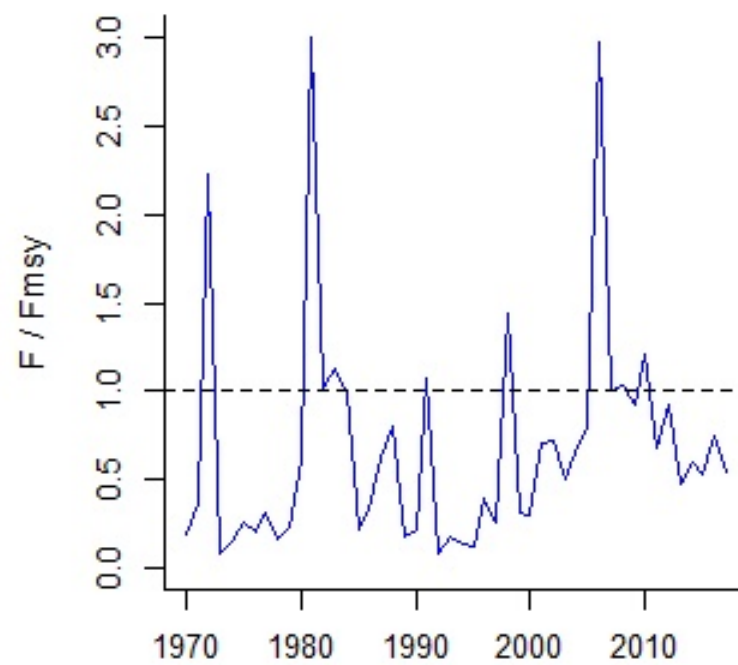

**F: Equilibrium curve**

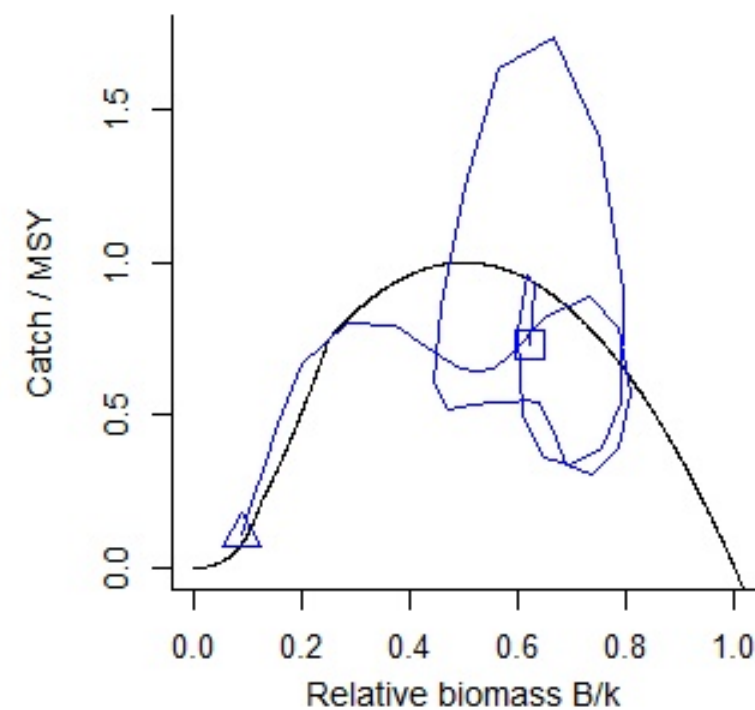



**Catch**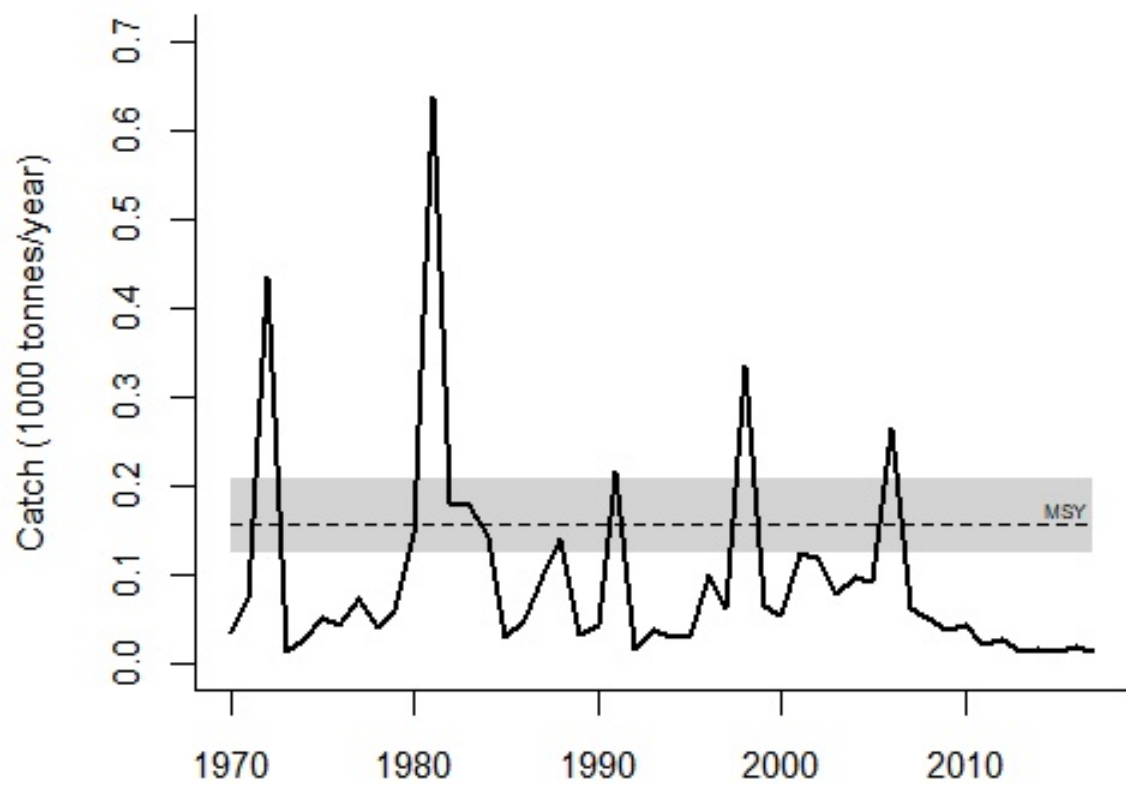**Stock size**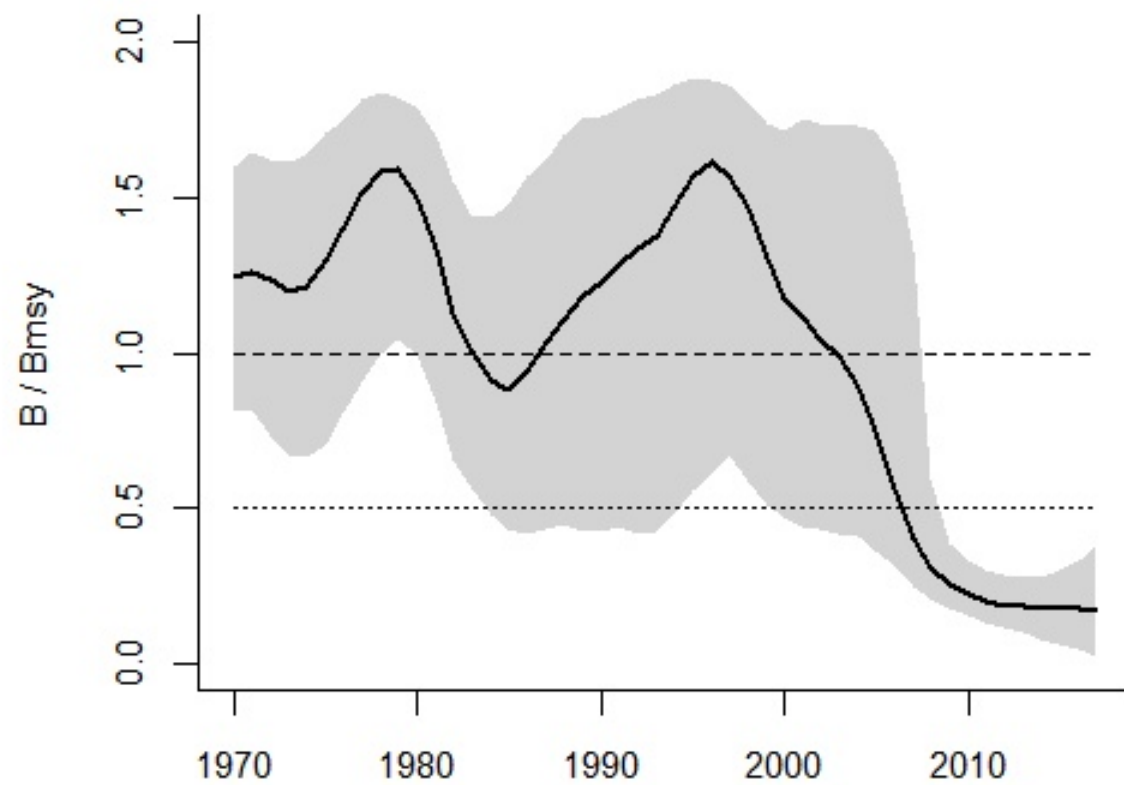**Exploitation**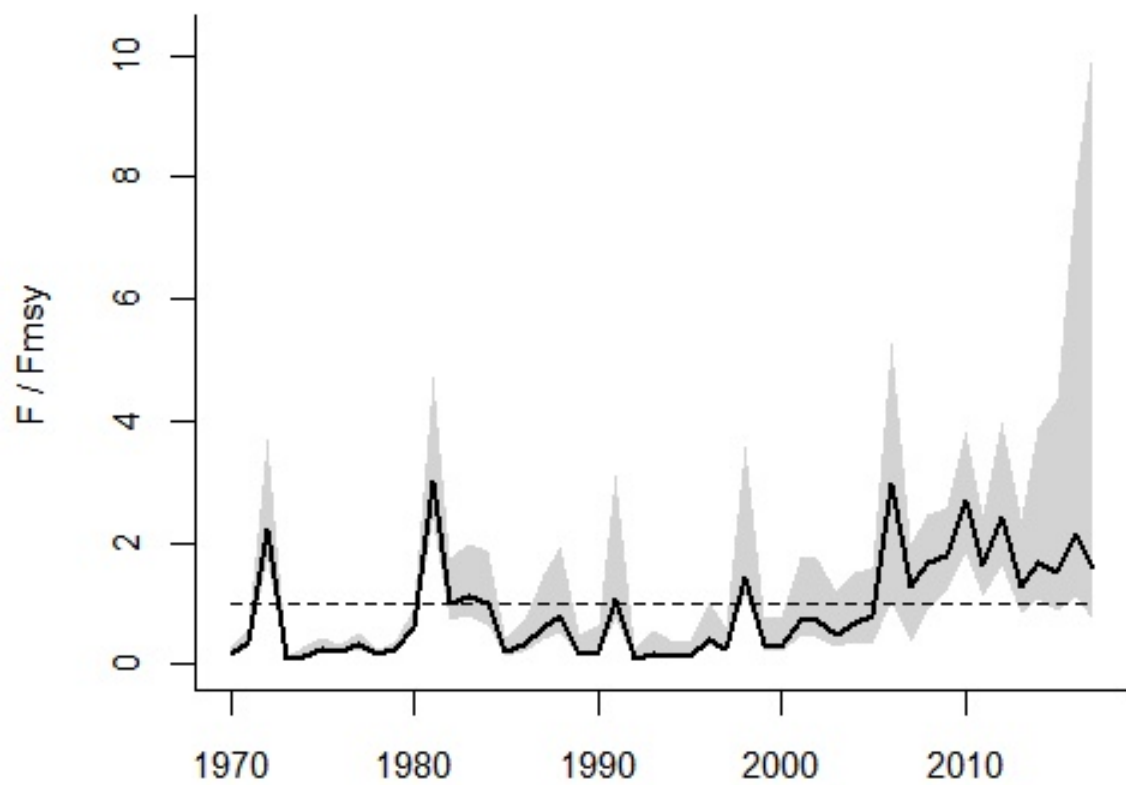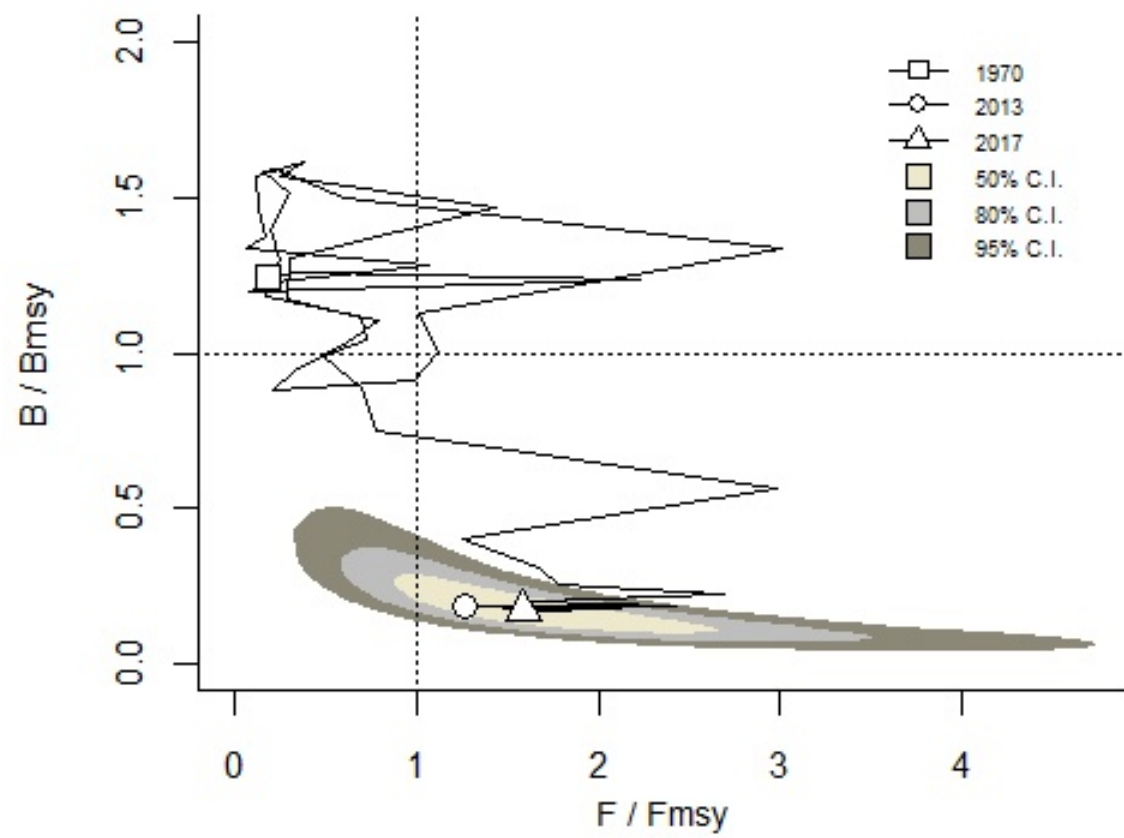

**A: Catch Mullet\_MS**

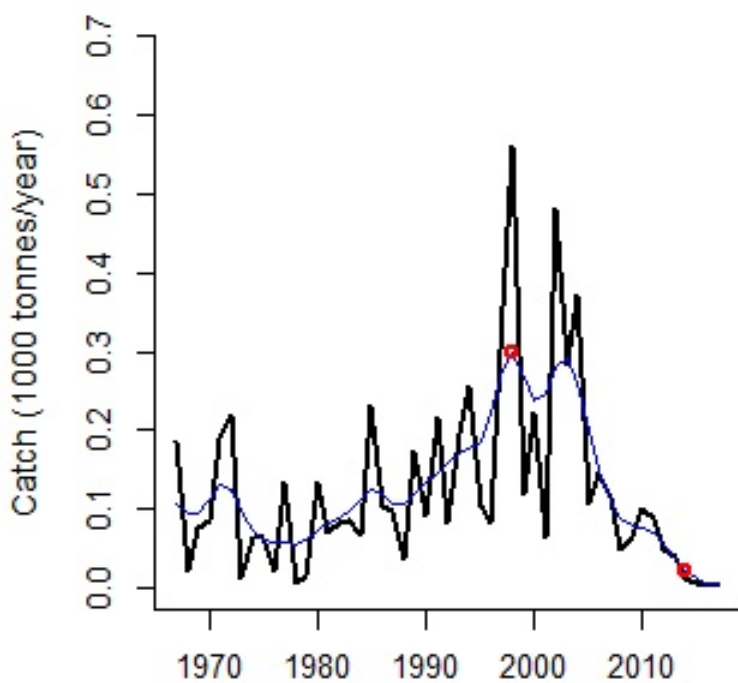

**B: Finding viable r-k**

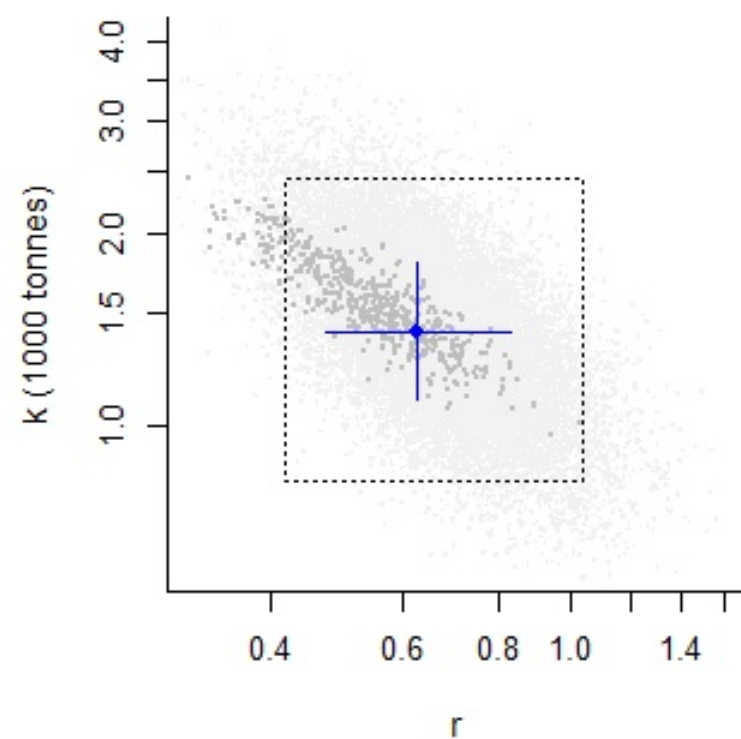

**C: Analysis of viable r-k**

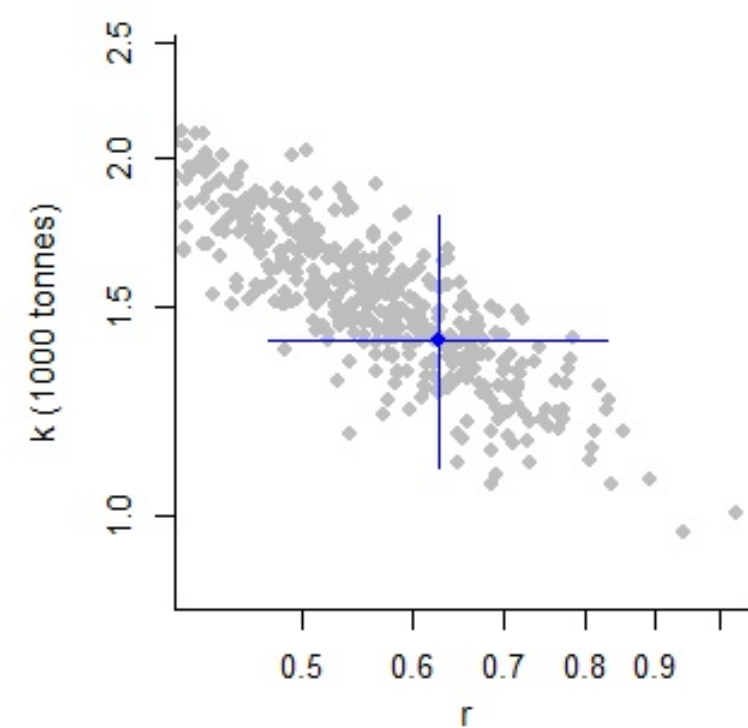

**D: Stock size**

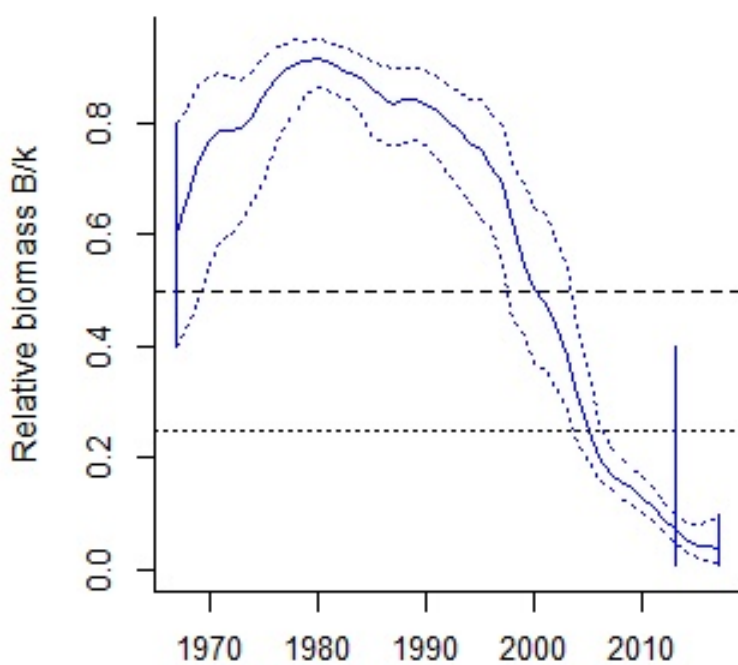

**E: Exploitation rate**

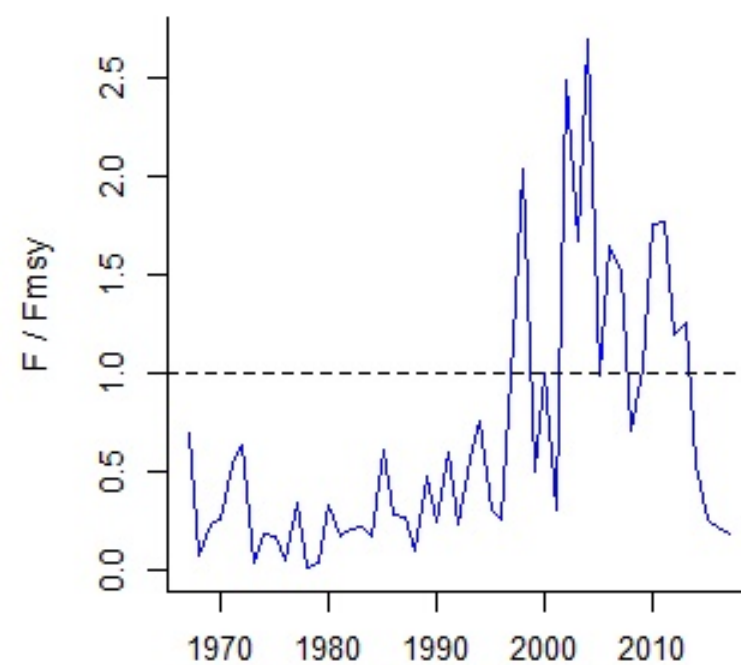

**F: Equilibrium curve**

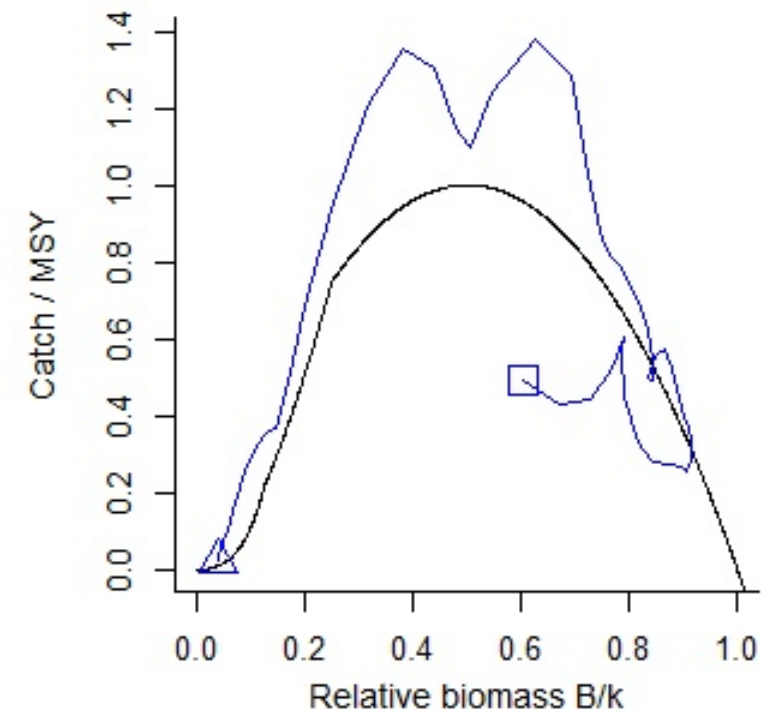

**Catch**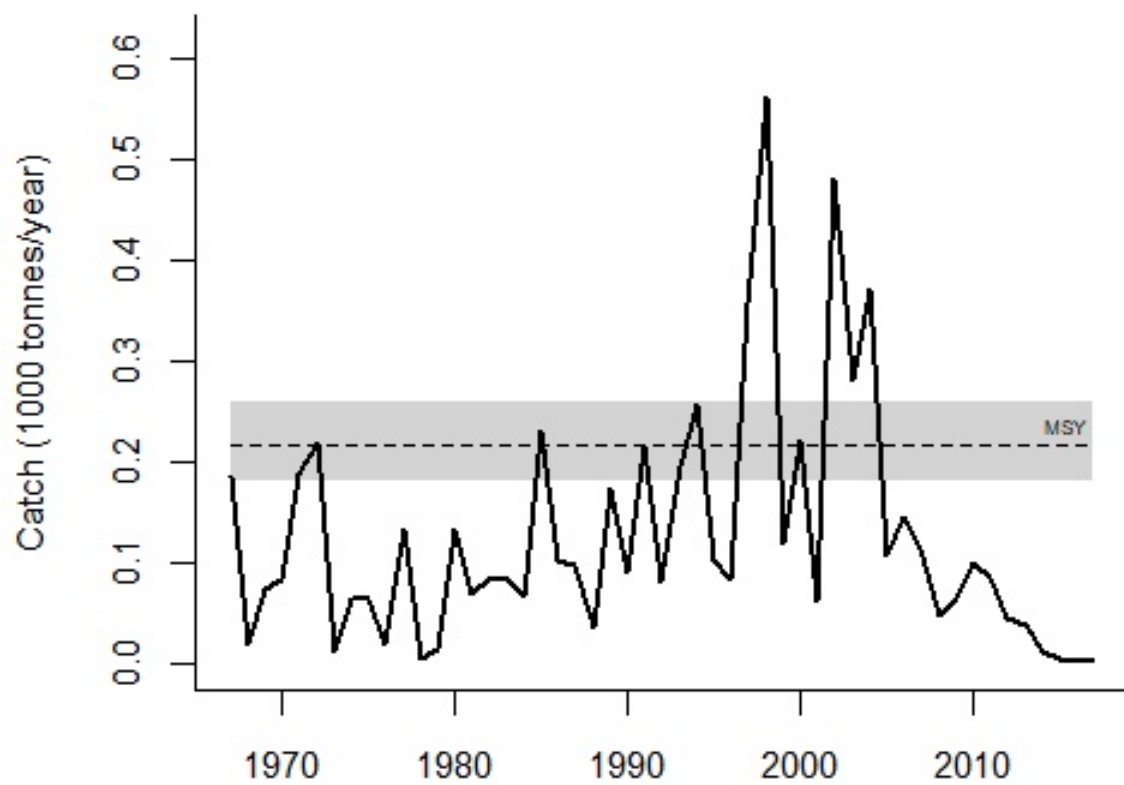**Stock size**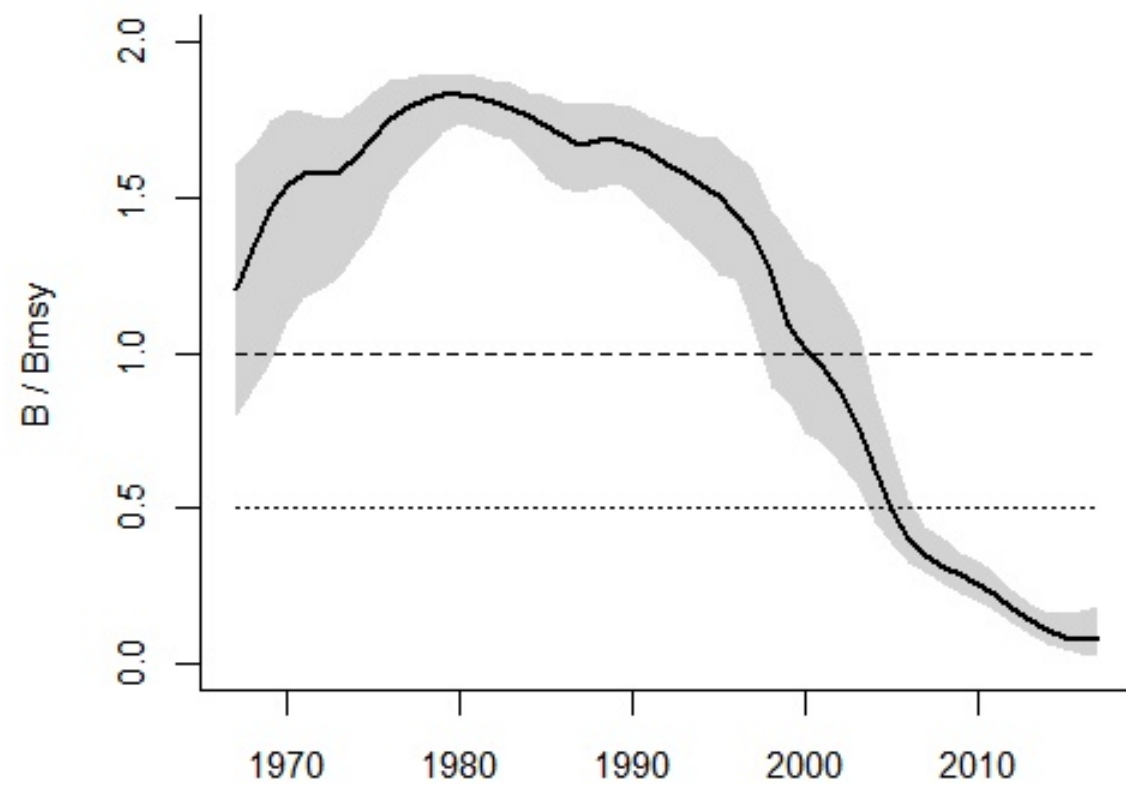**Exploitation**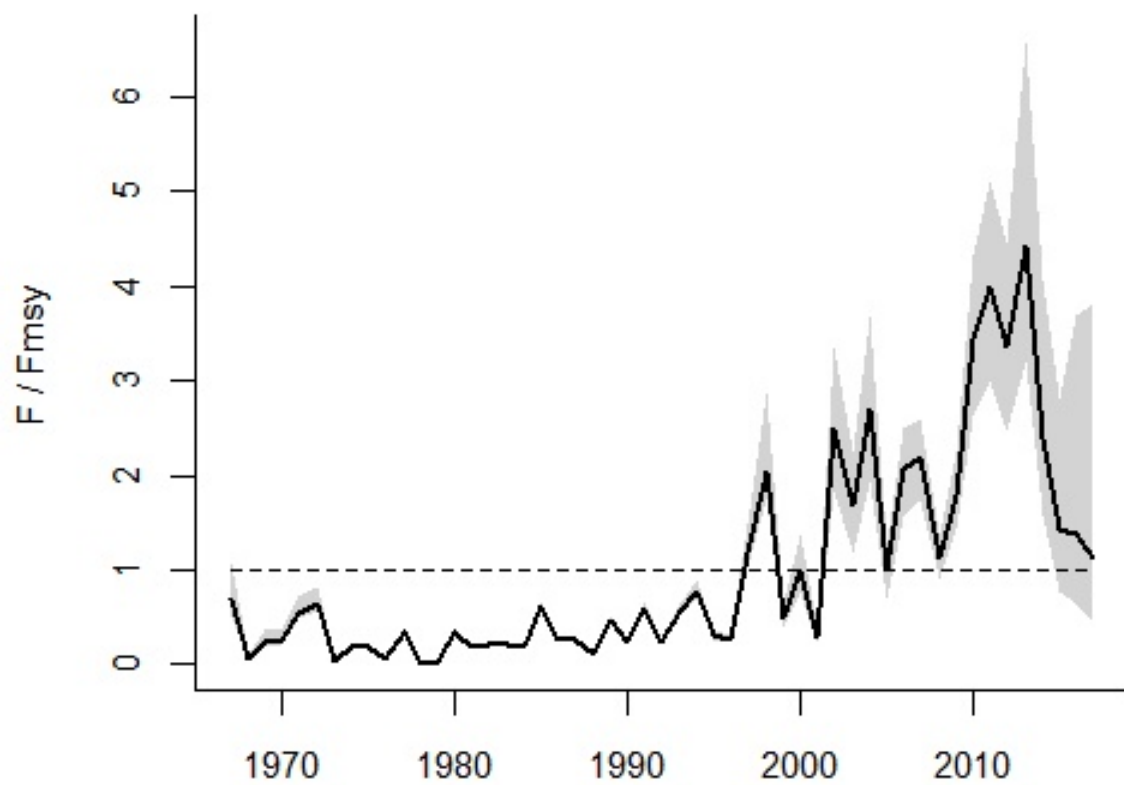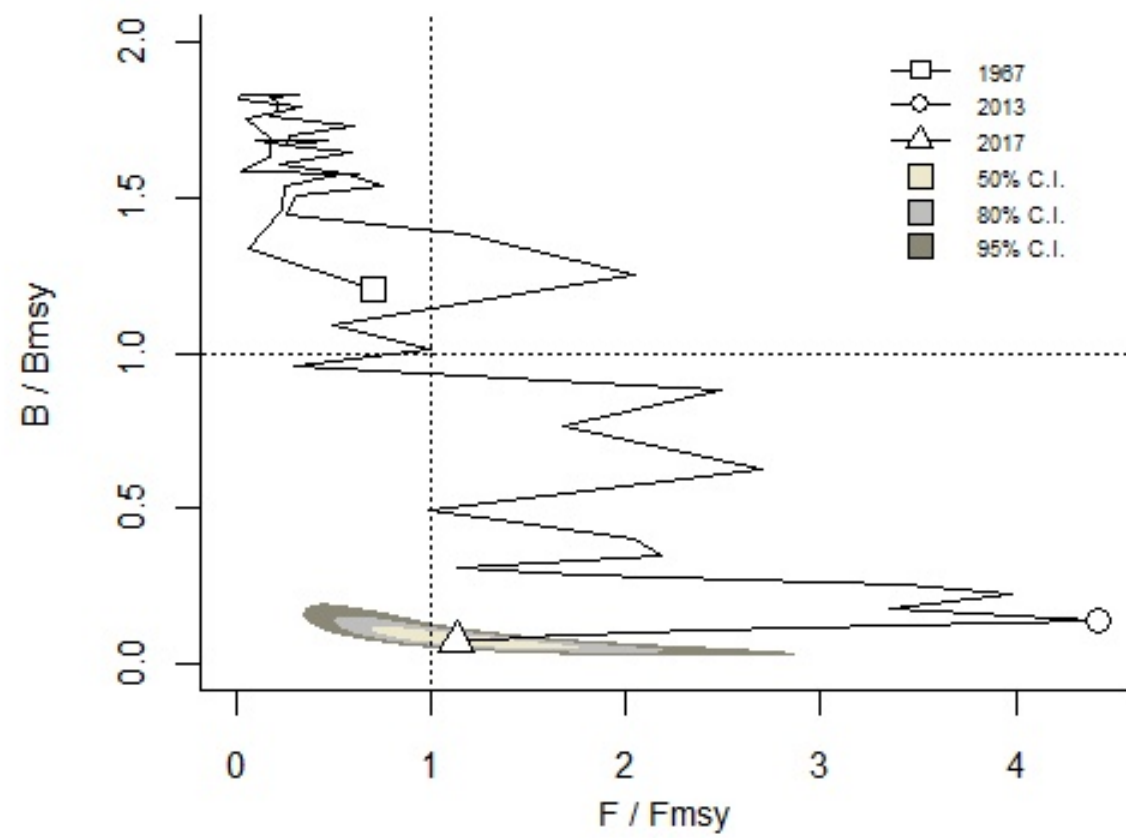

**A: Catch Surmullet\_MS**

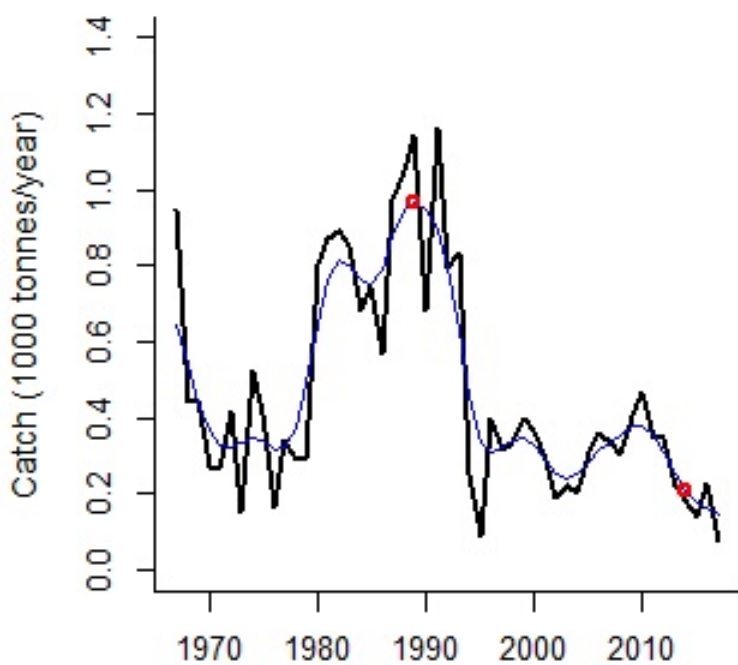

**B: Finding viable r-k**

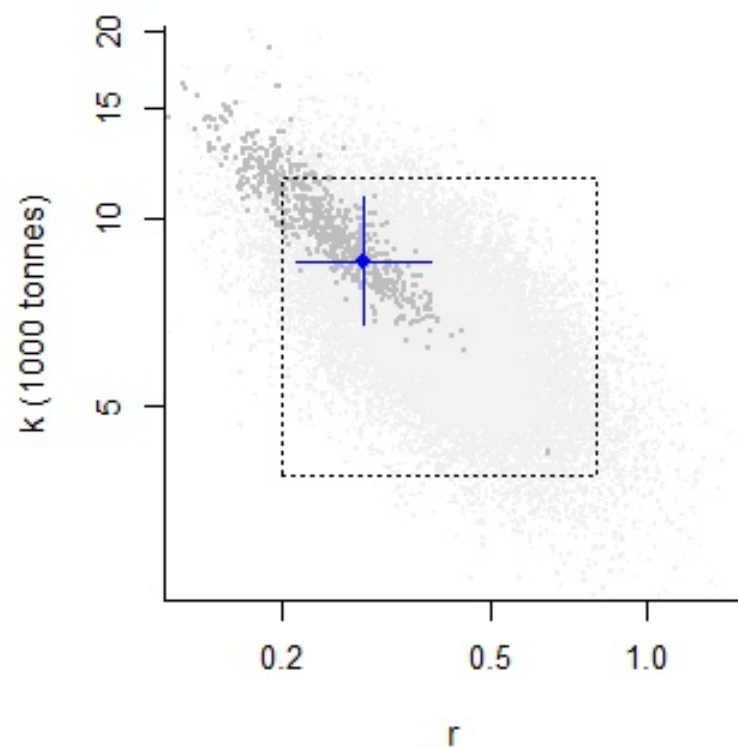

**C: Analysis of viable r-k**

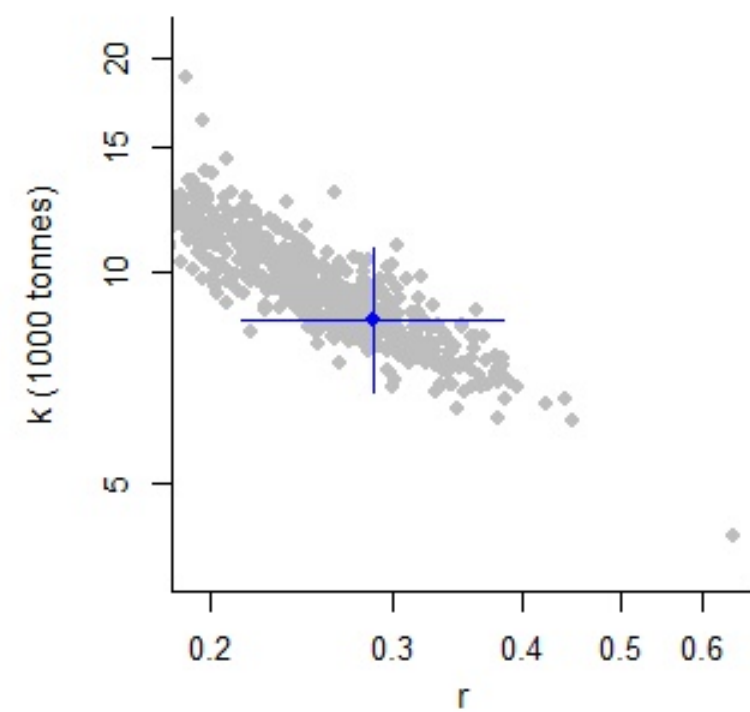

**D: Stock size**

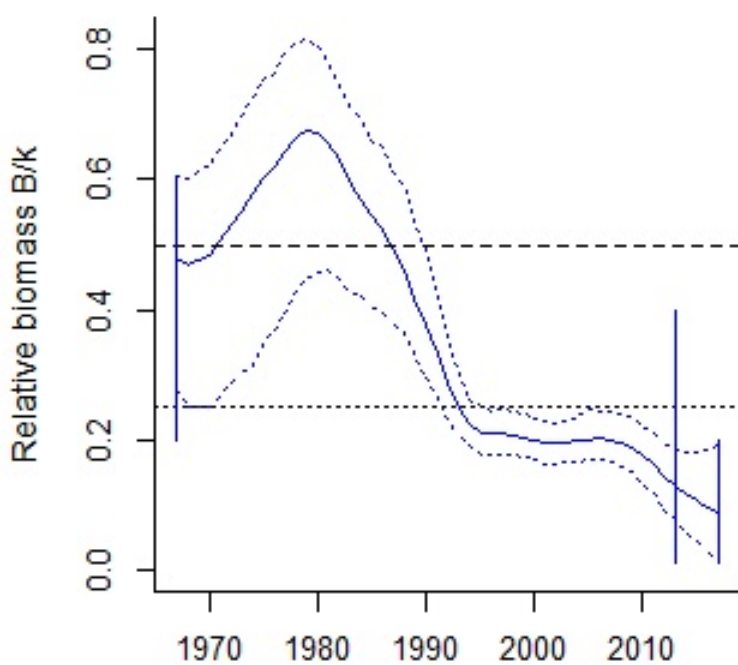

**E: Exploitation rate**

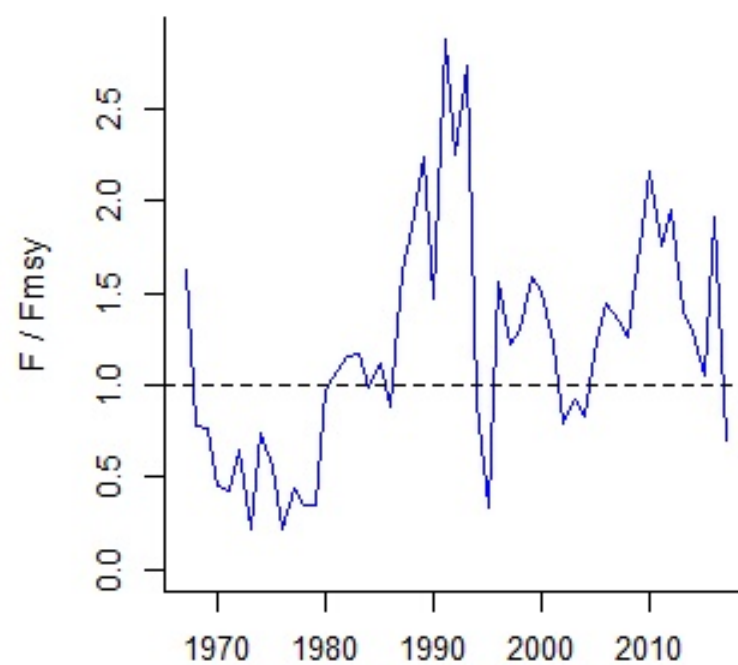

**F: Equilibrium curve**

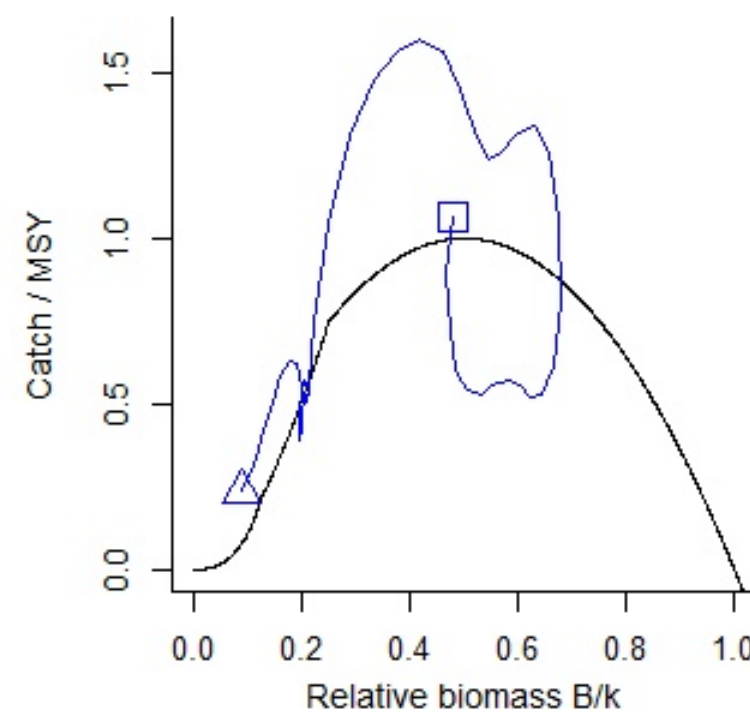



**Catch**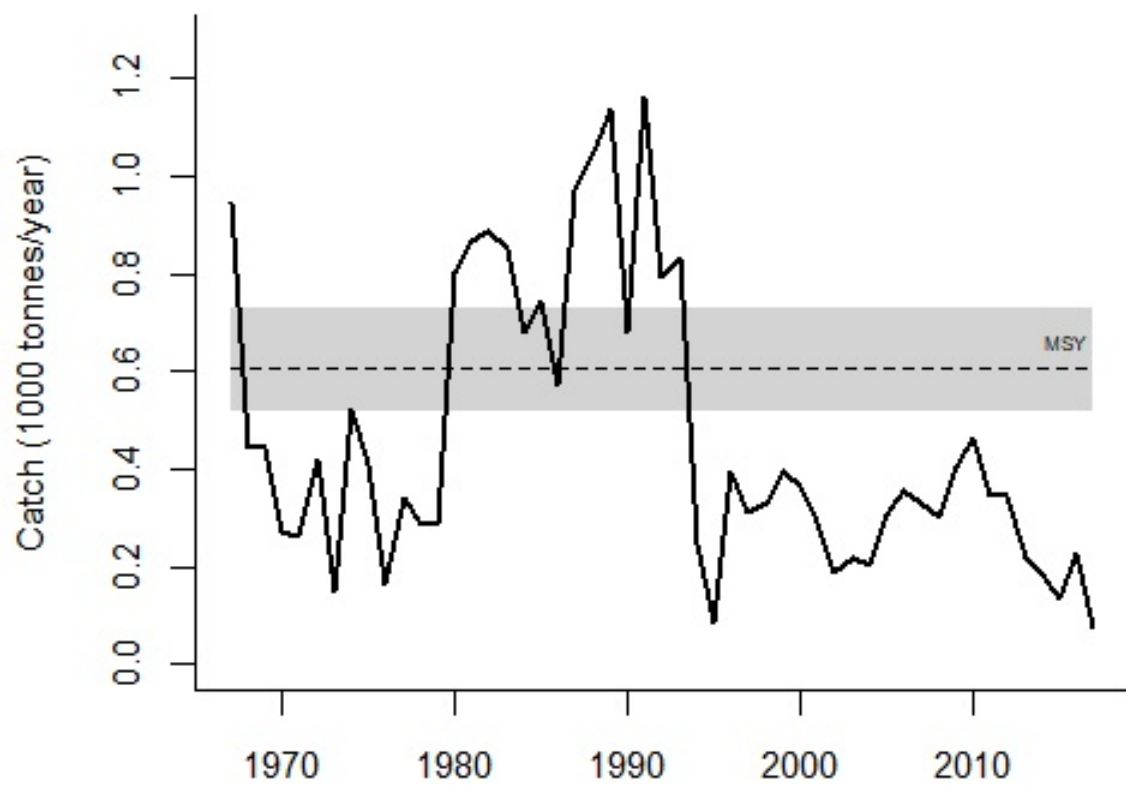**Stock size**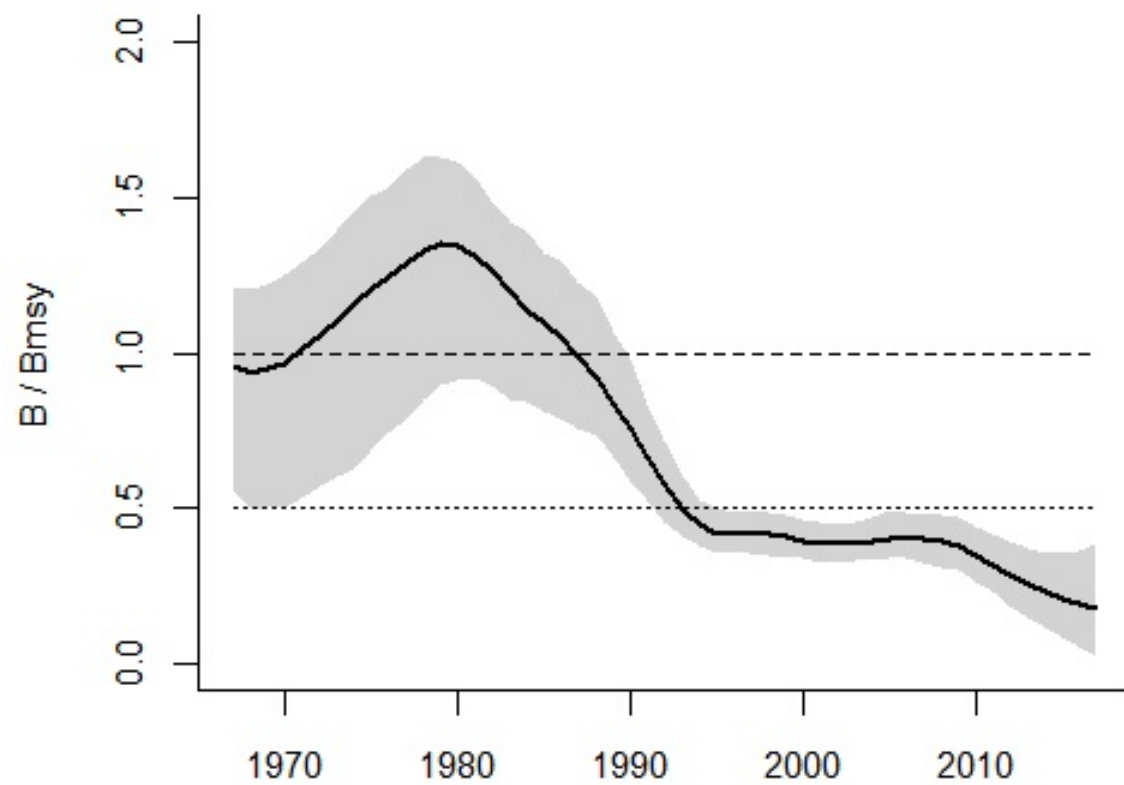**Exploitation**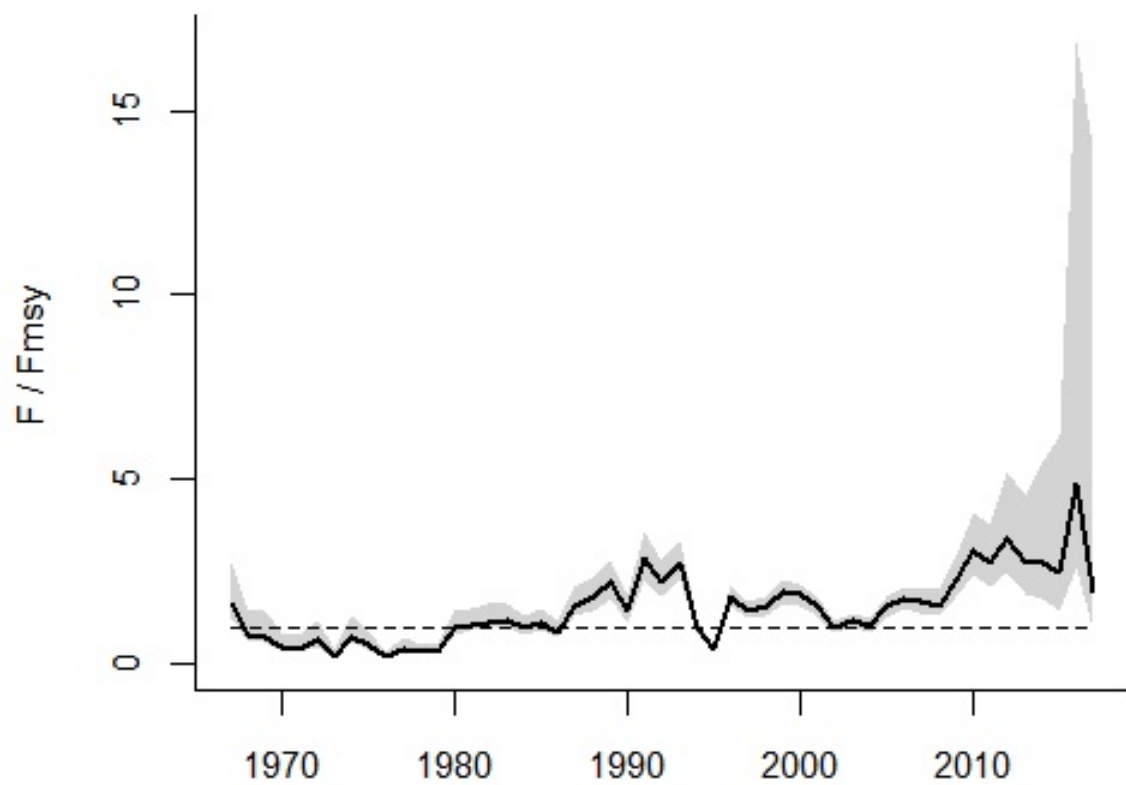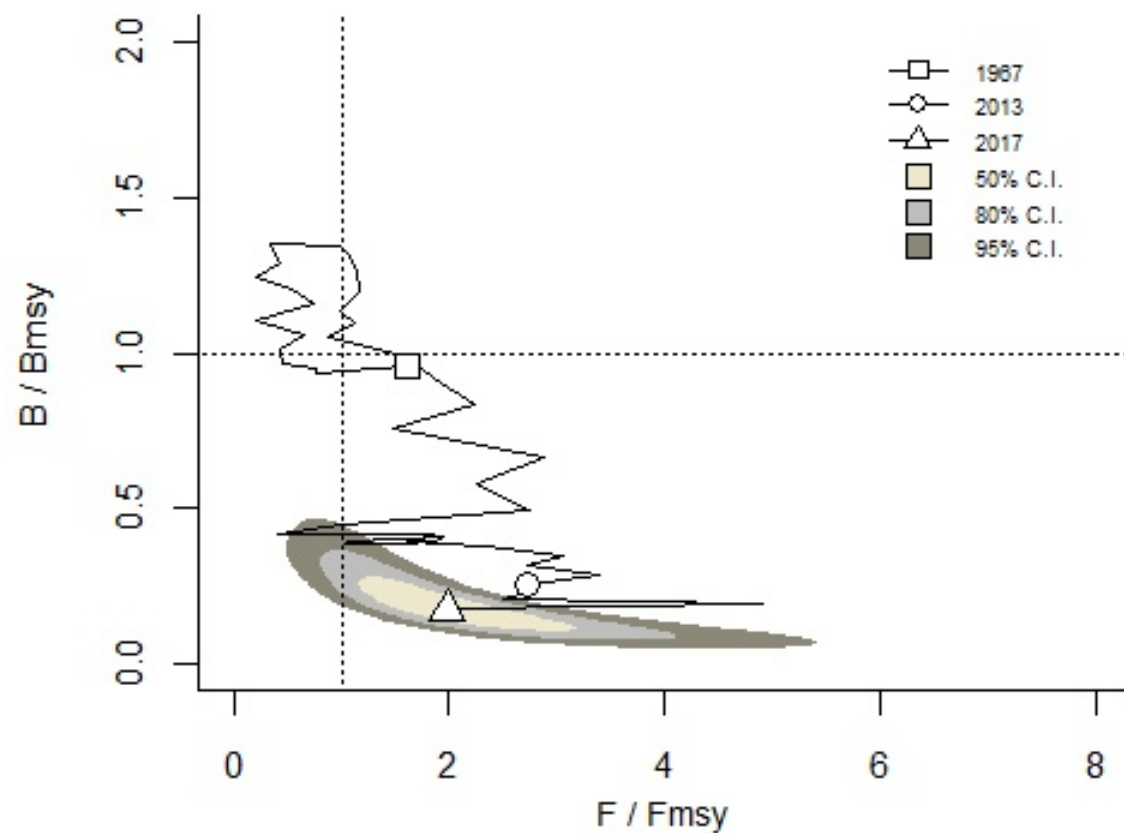

**A: Catch Raja\_MS**

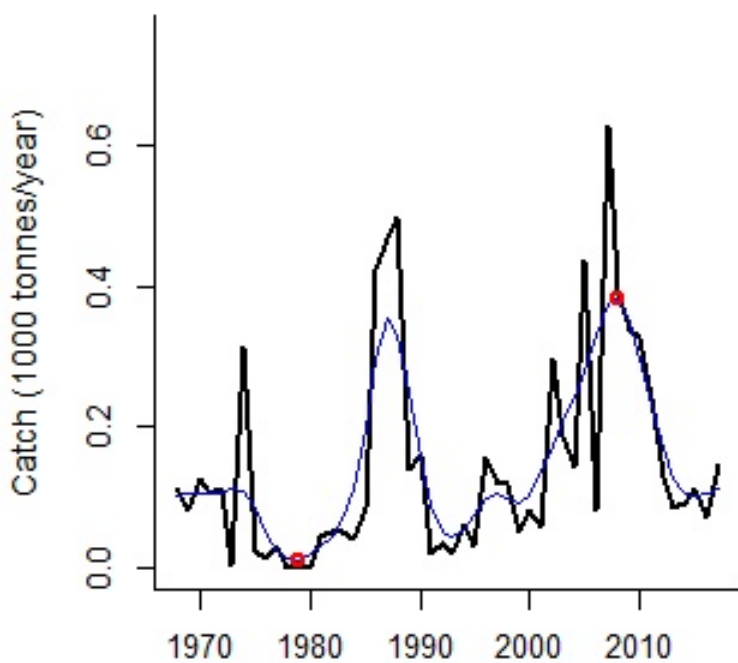

**B: Finding viable r-k**

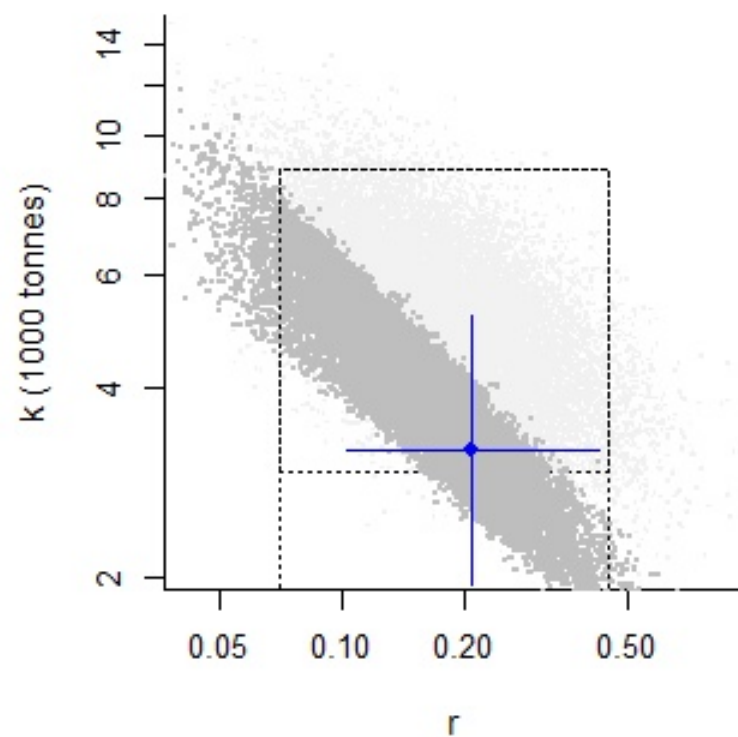

**C: Analysis of viable r-k**

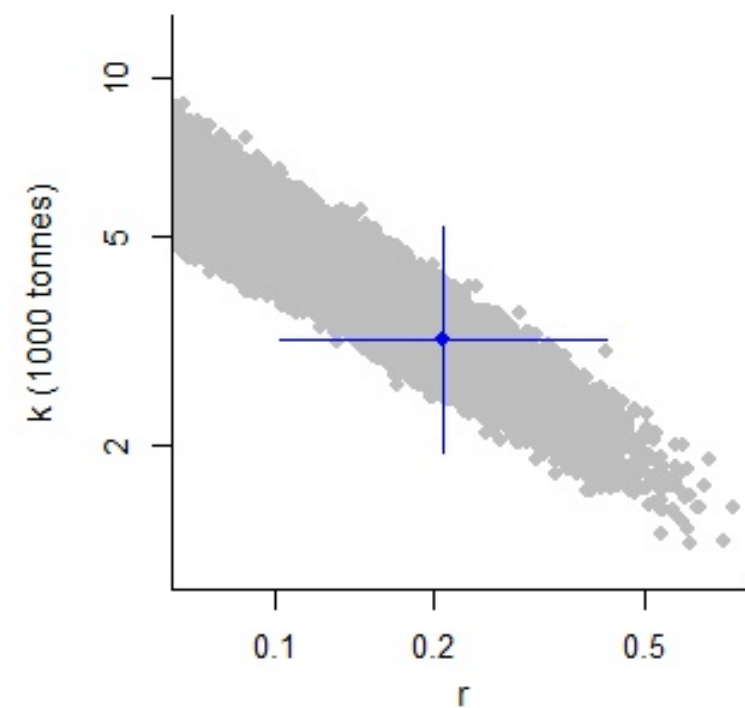

**D: Stock size**

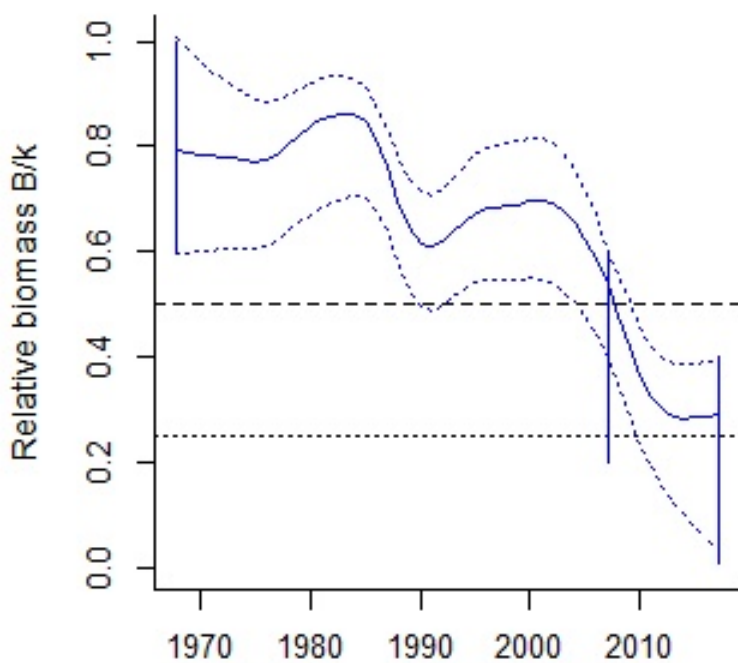

**E: Exploitation rate**

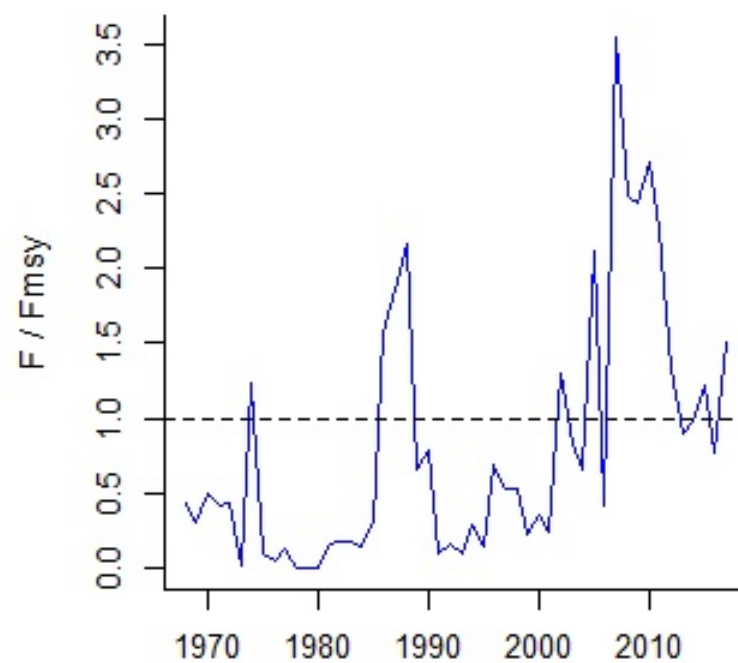

**F: Equilibrium curve**

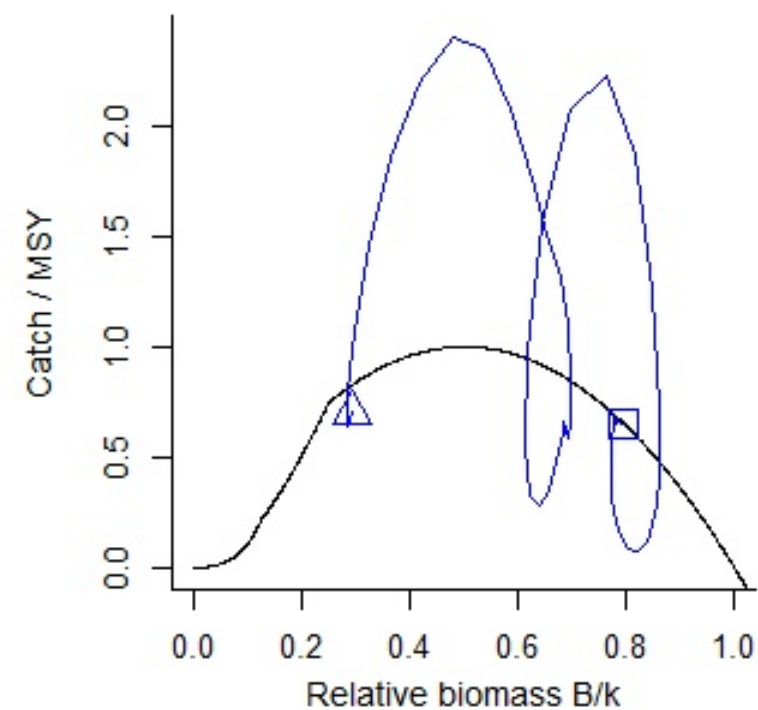

**Catch**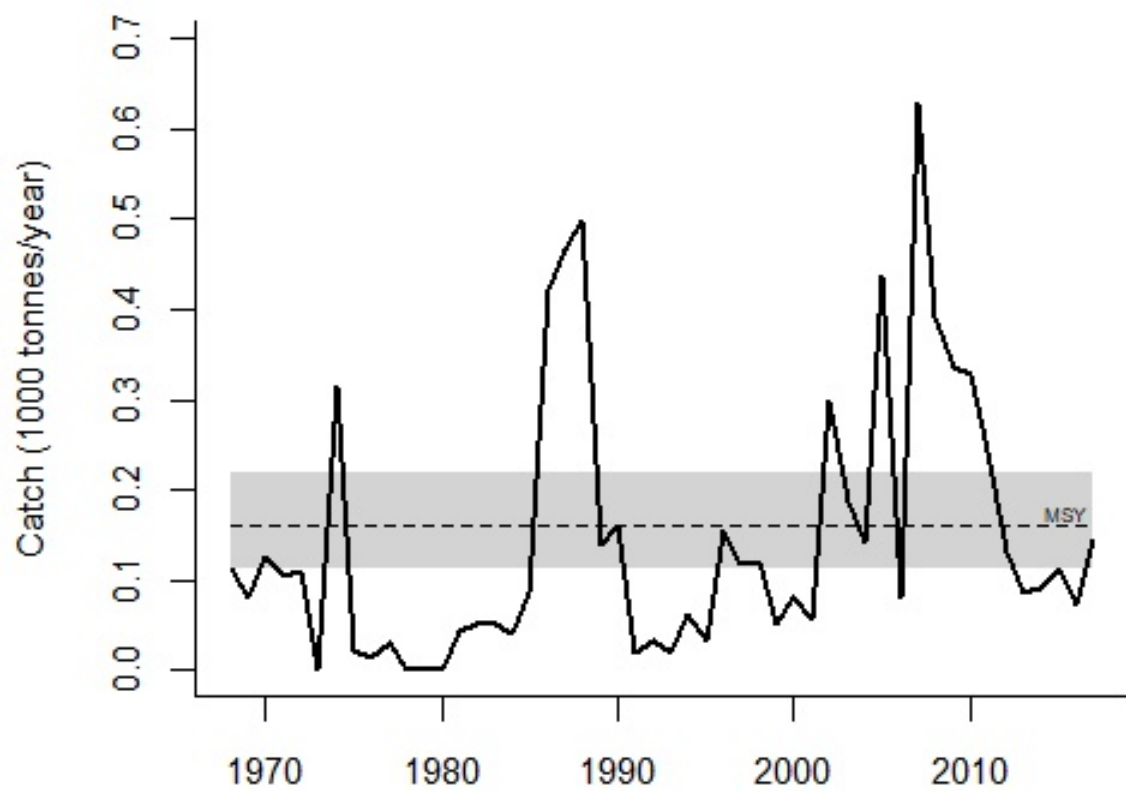**Stock size**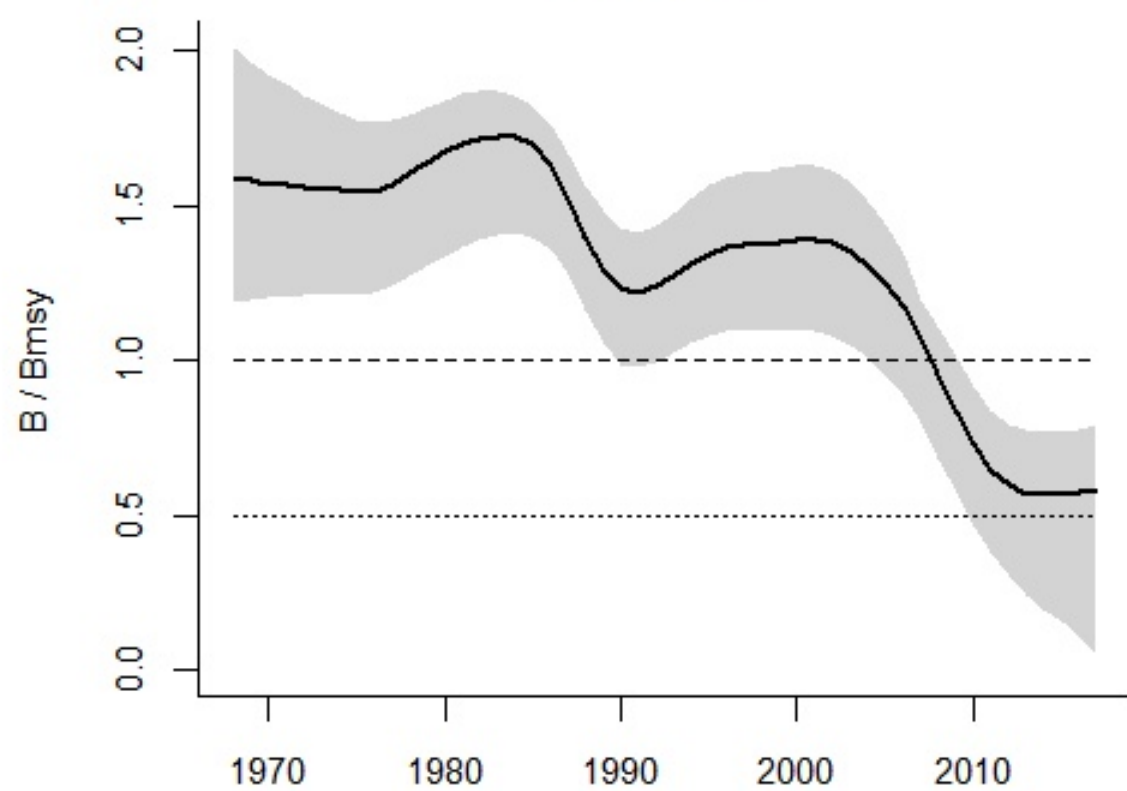**Exploitation**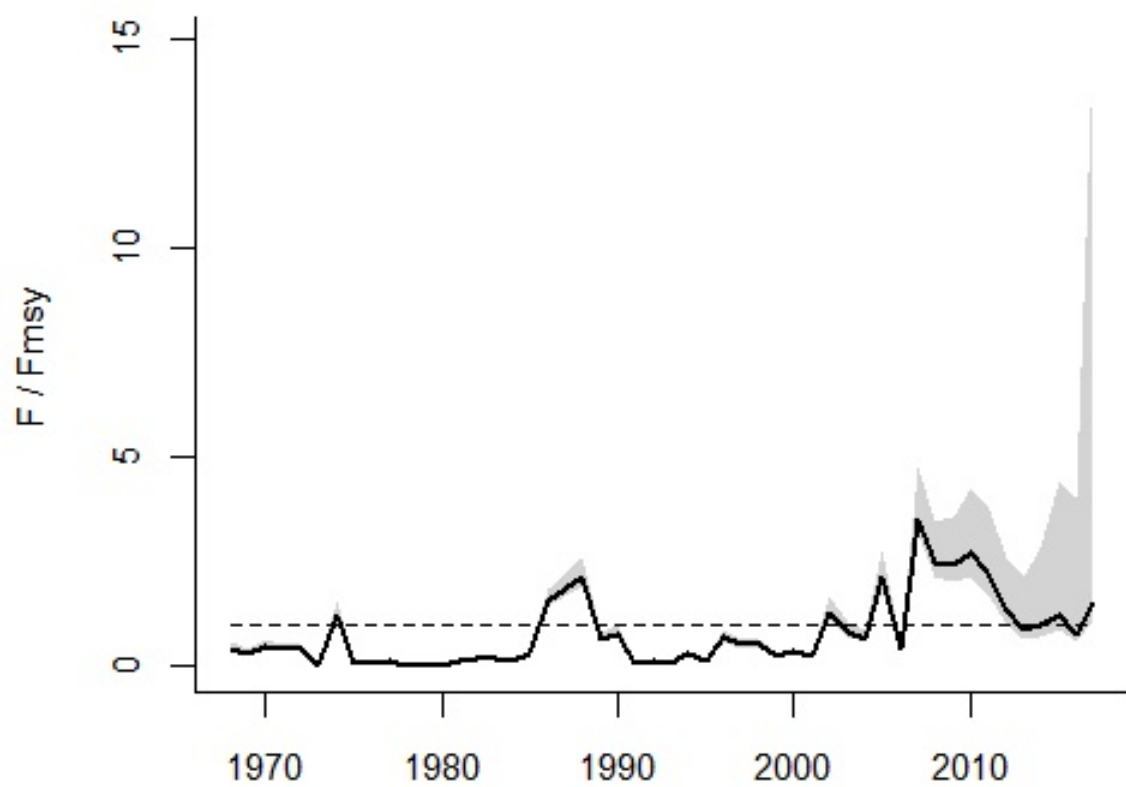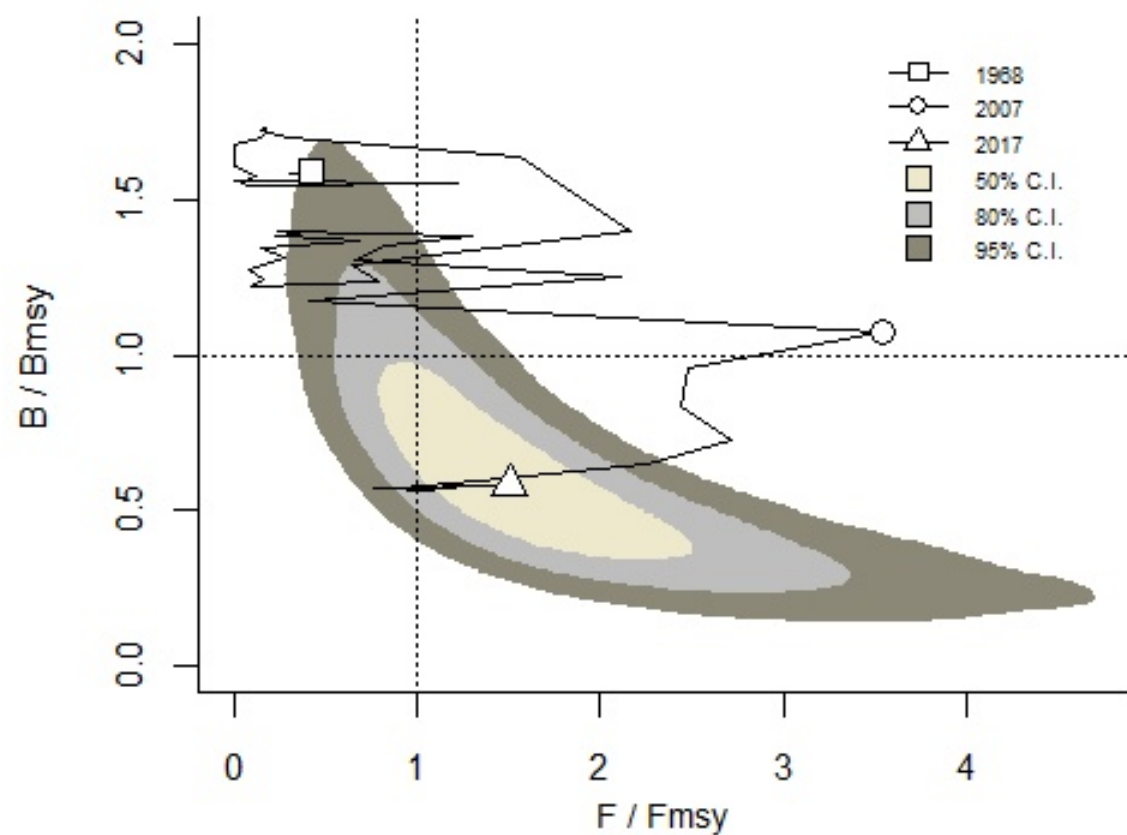

**A: Catch Dogfish\_MS**

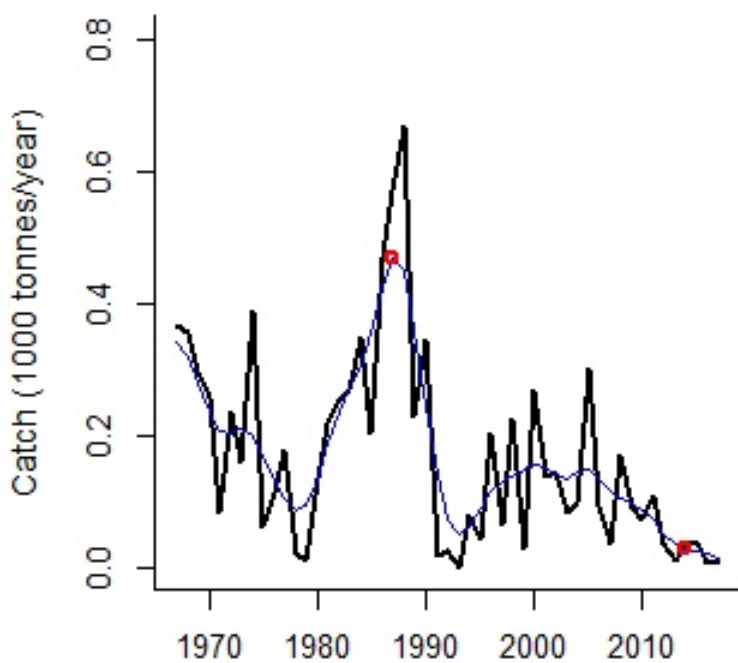

**B: Finding viable r-k**

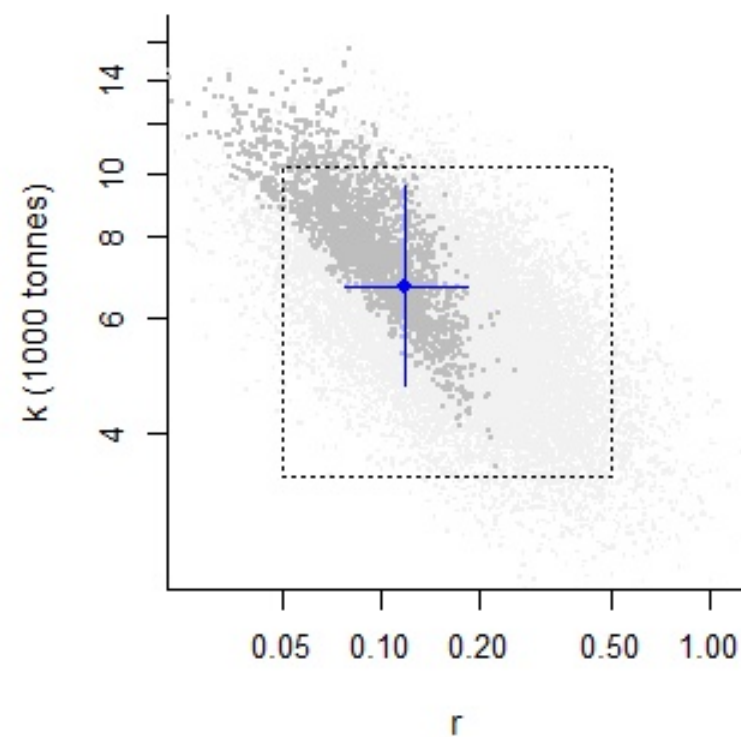

**C: Analysis of viable r-k**

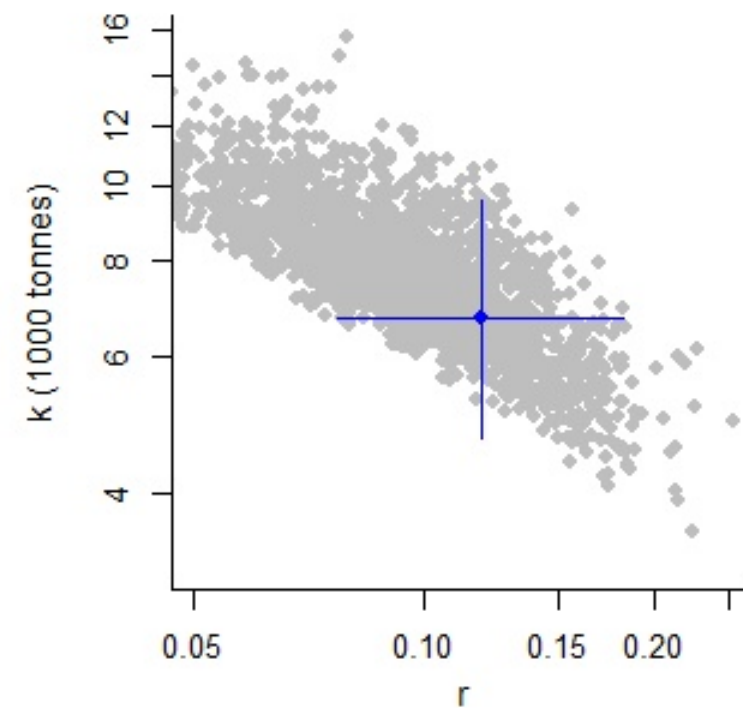

**D: Stock size**

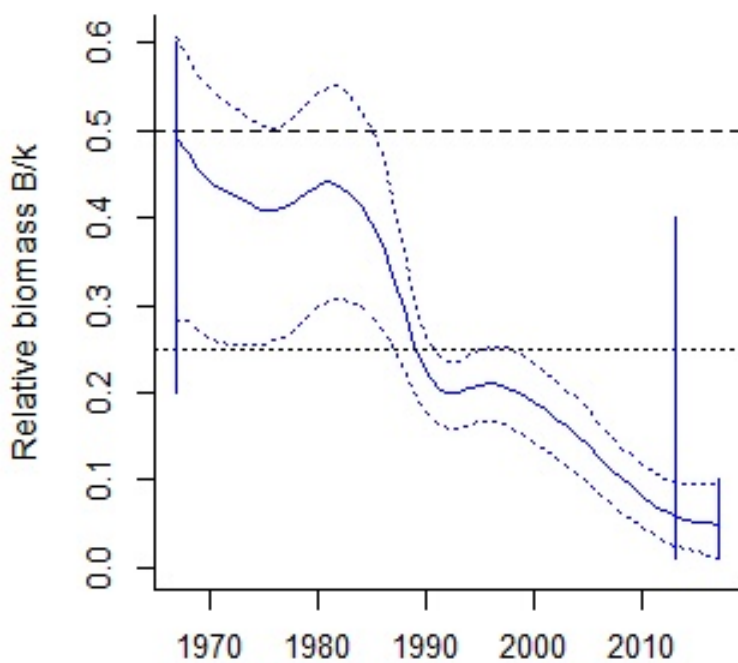

**E: Exploitation rate**

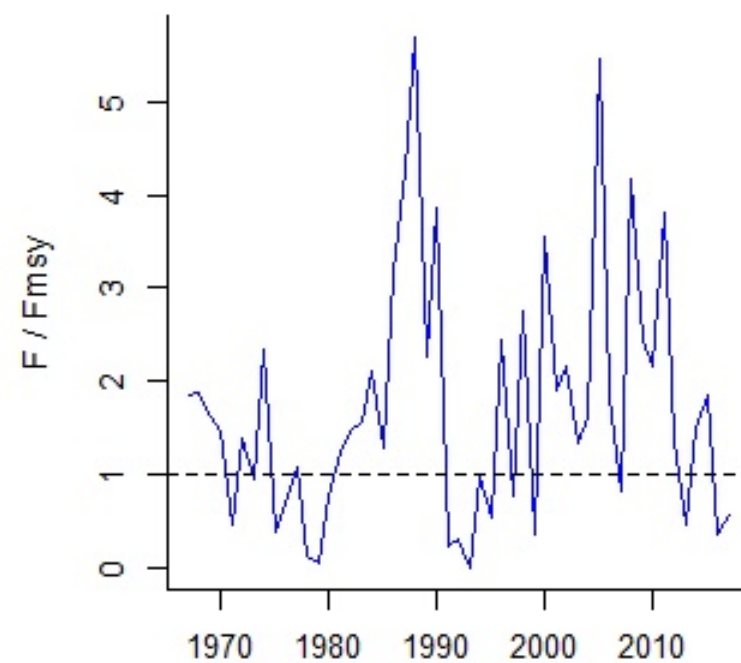

**F: Equilibrium curve**

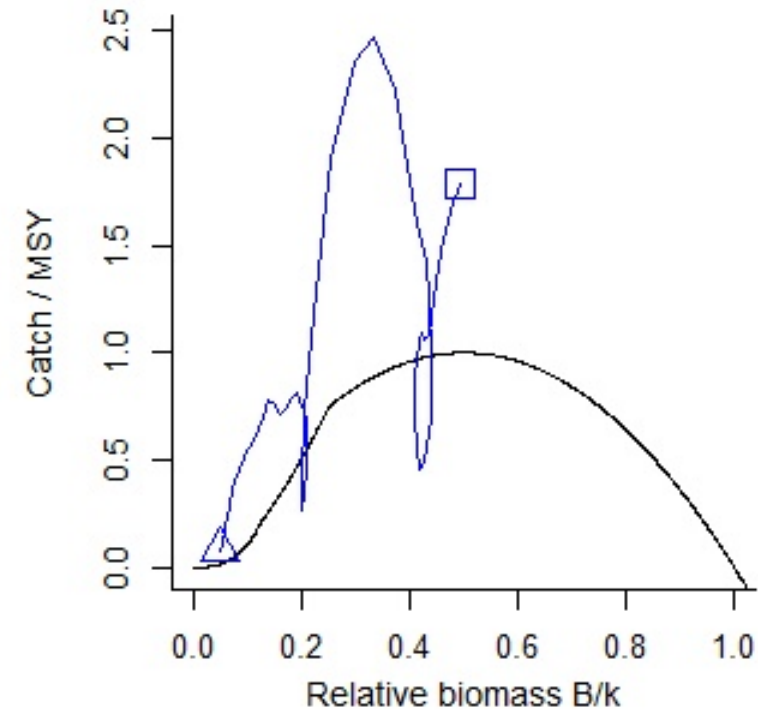



**Catch**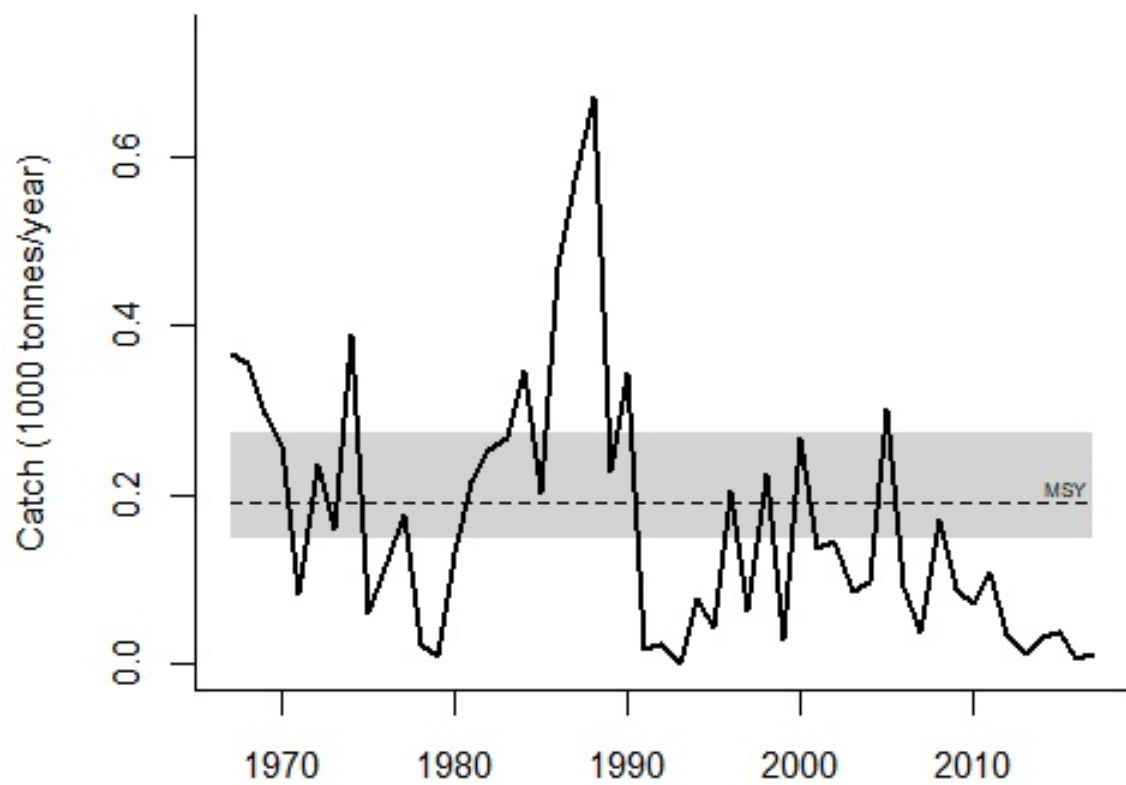**Stock size**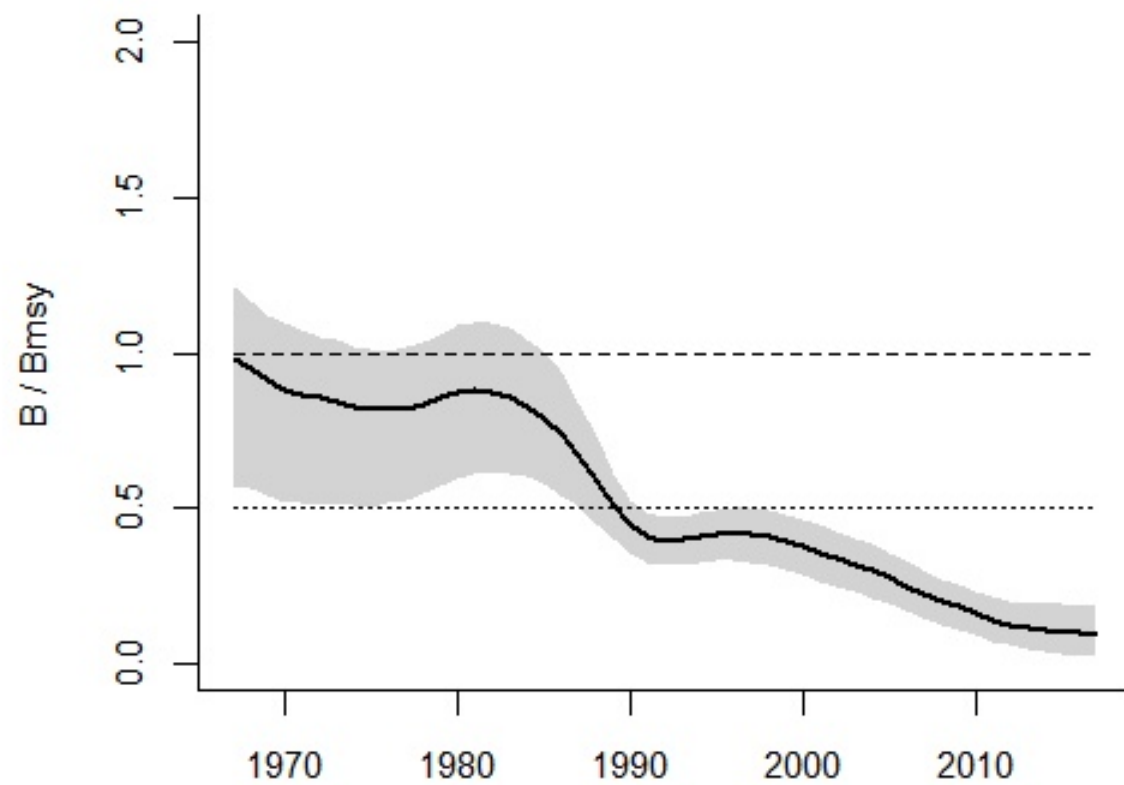**Exploitation**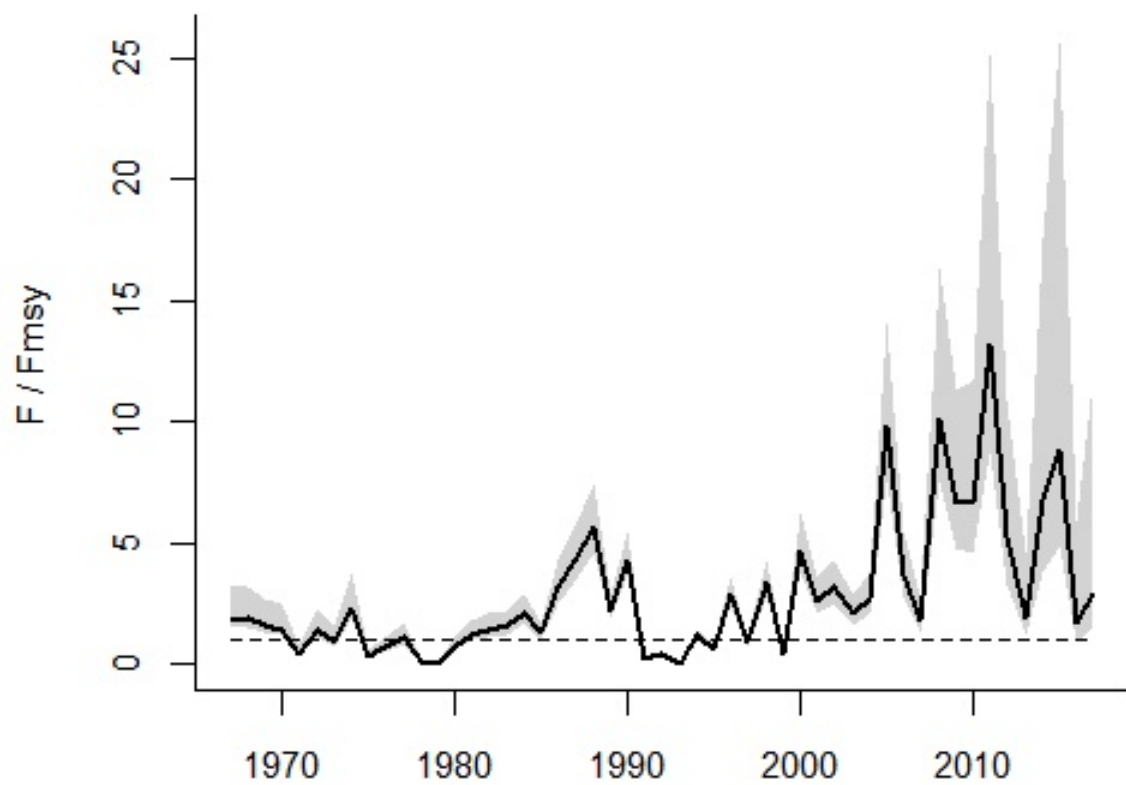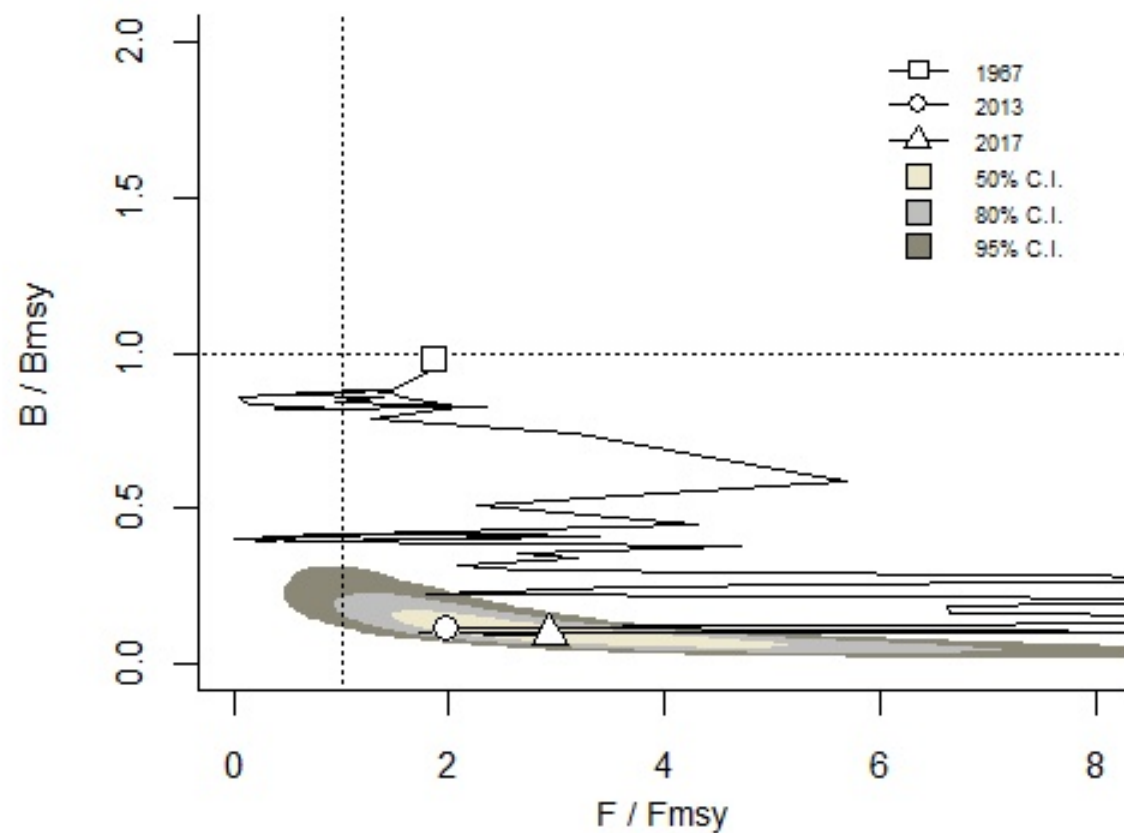

**A: Catch Angelshark\_MS**

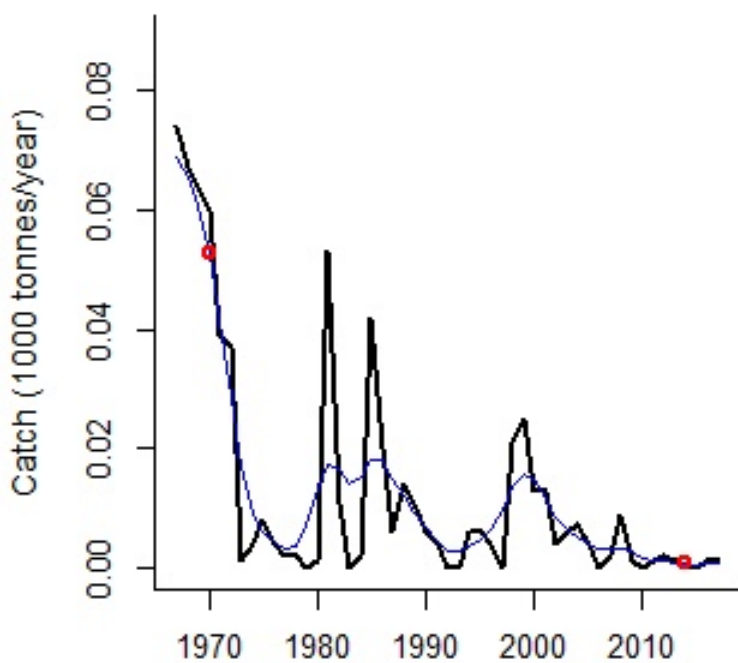

**B: Finding viable r-k**

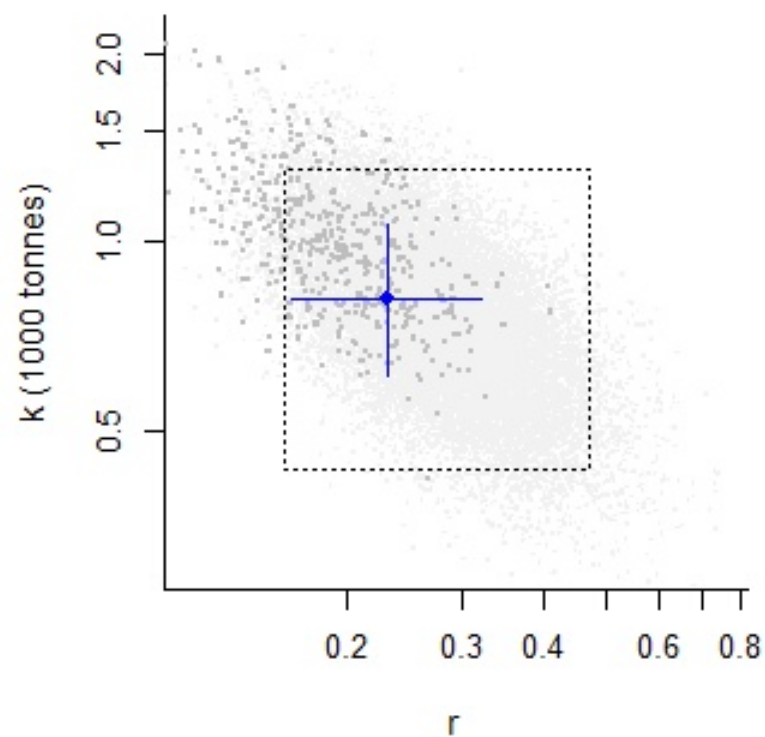

**C: Analysis of viable r-k**

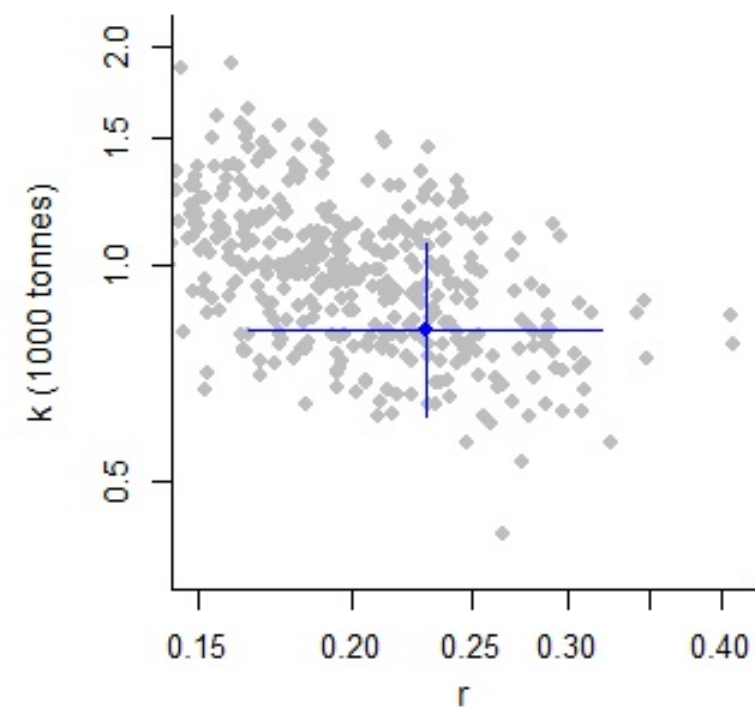

**D: Stock size**

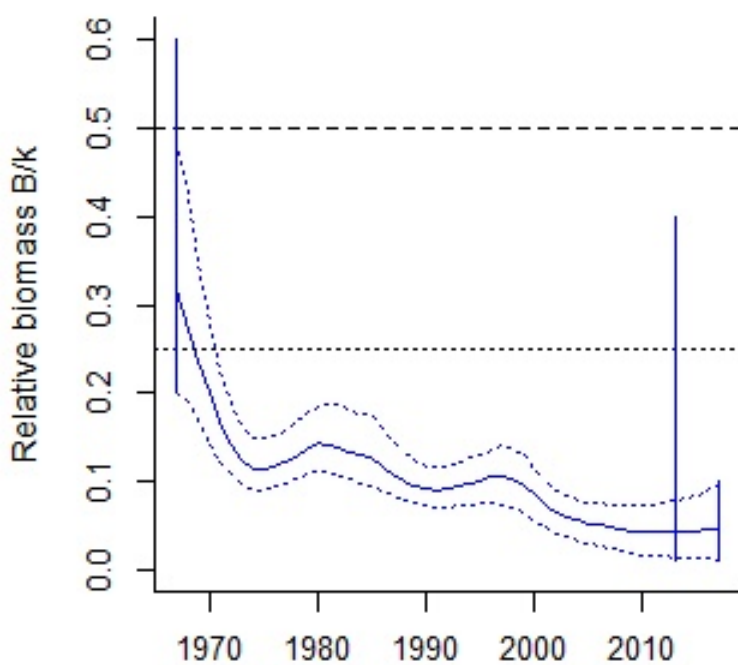

**E: Exploitation rate**

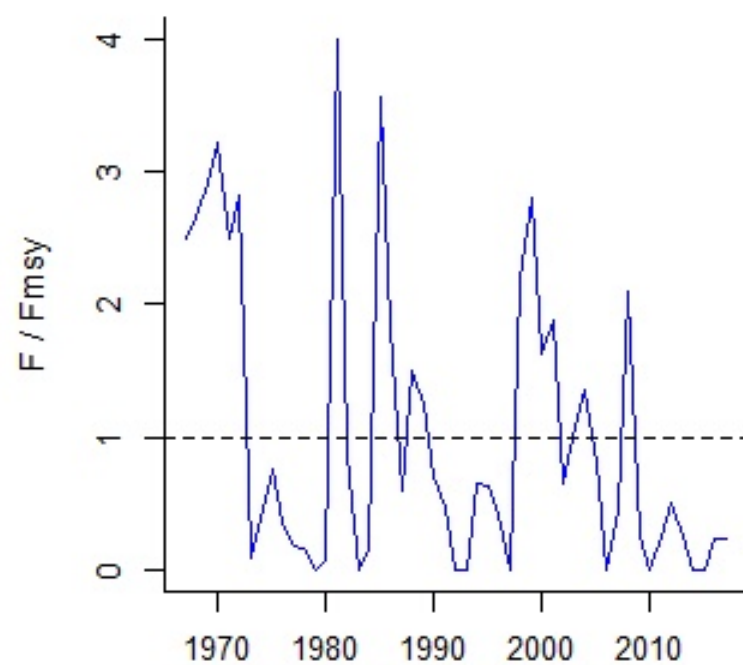

**F: Equilibrium curve**

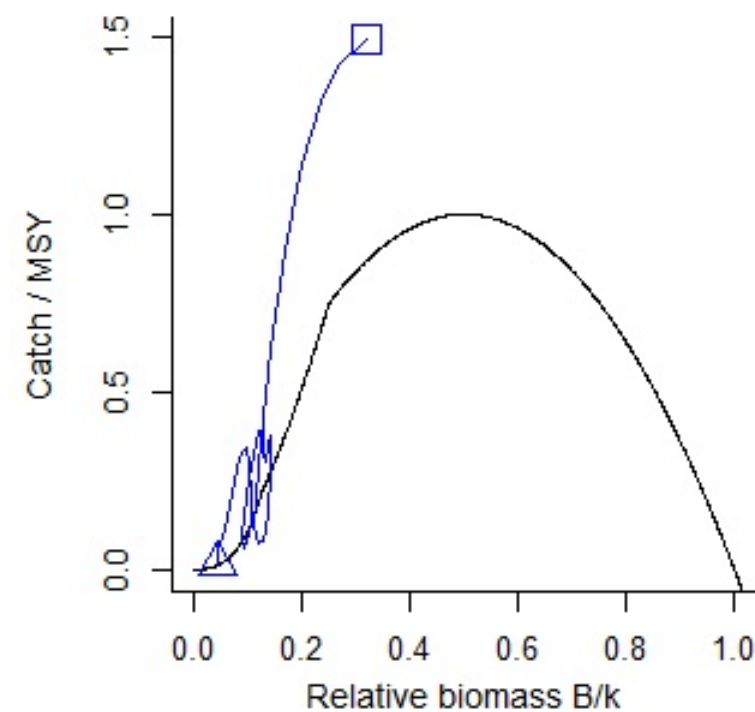

**Catch**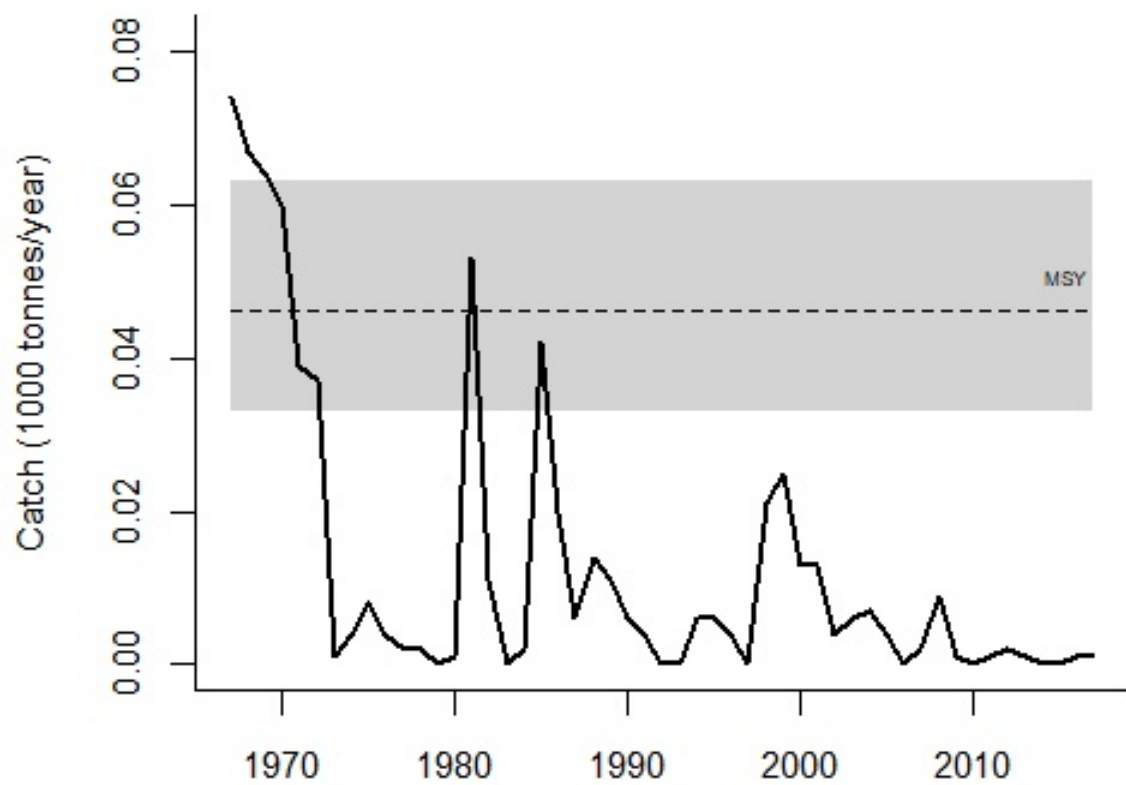**Stock size**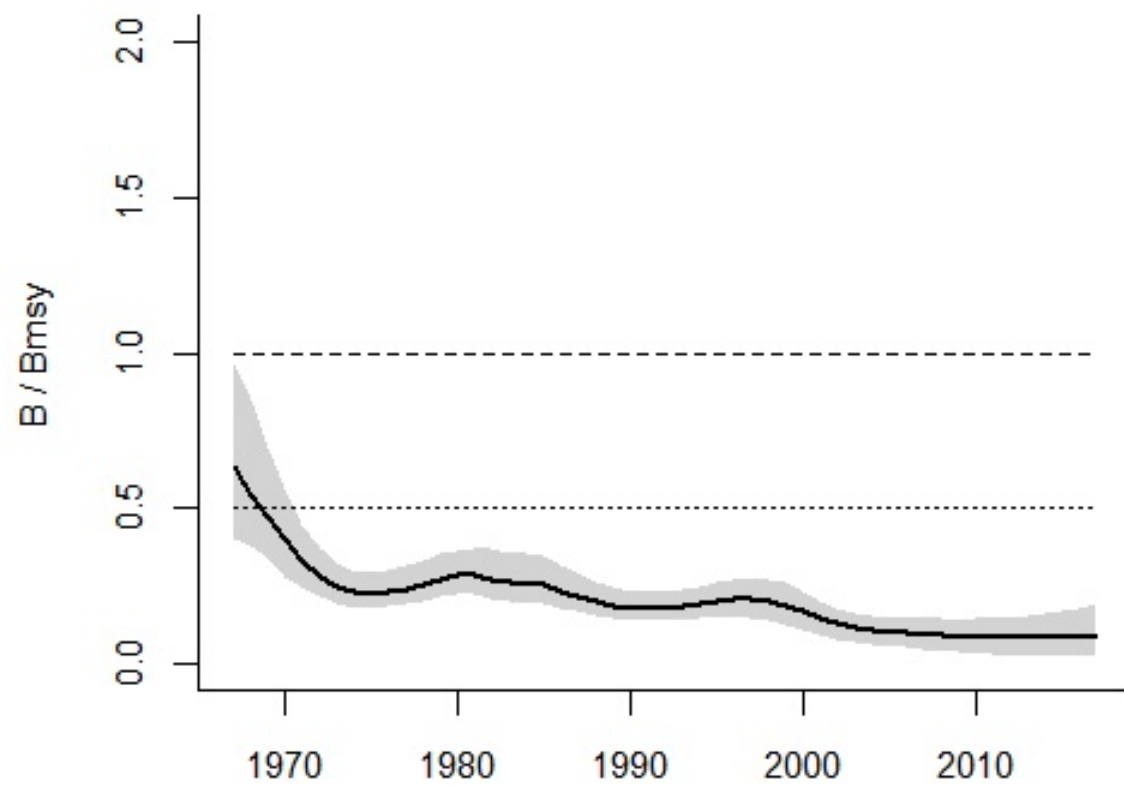**Exploitation**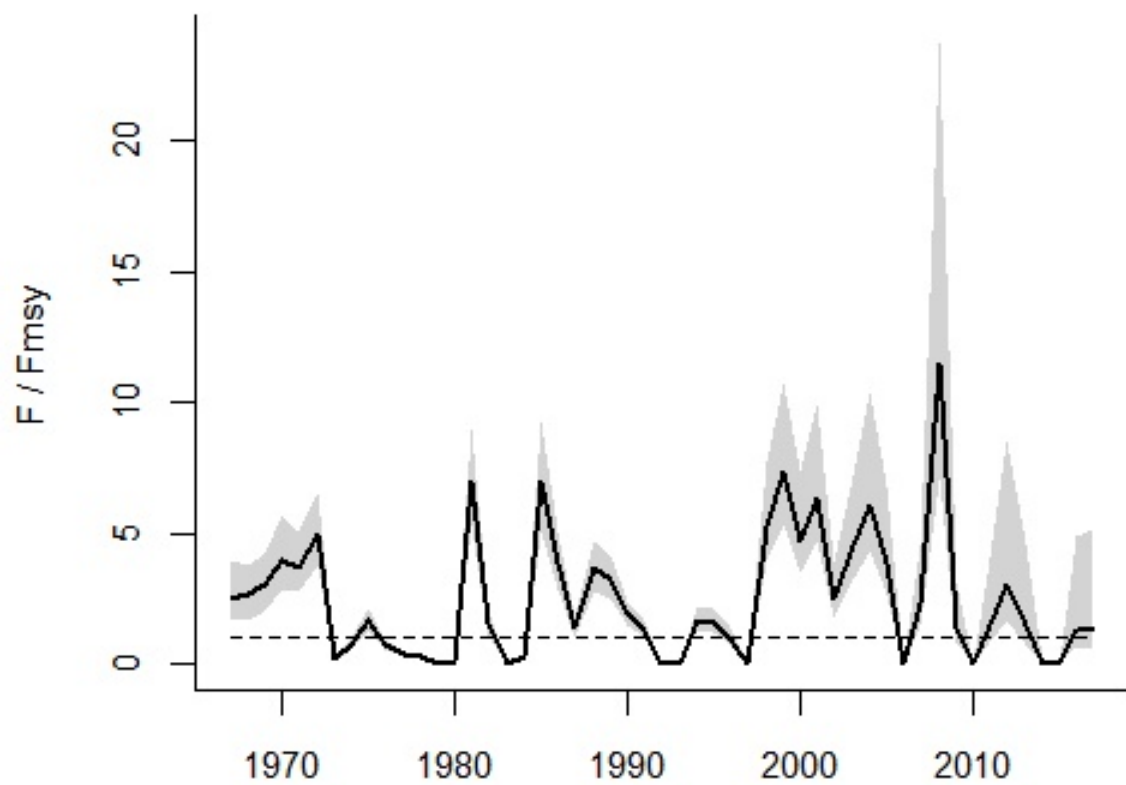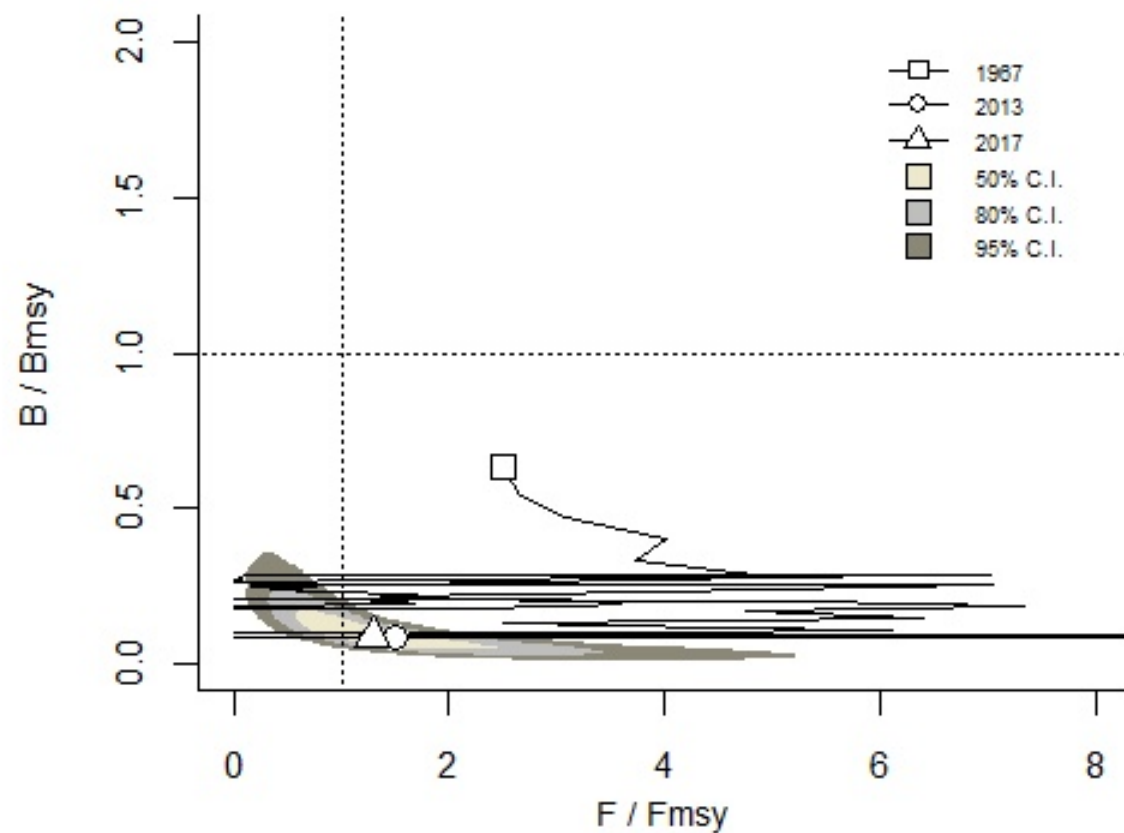

**A: Catch RoseShrimp\_MS**

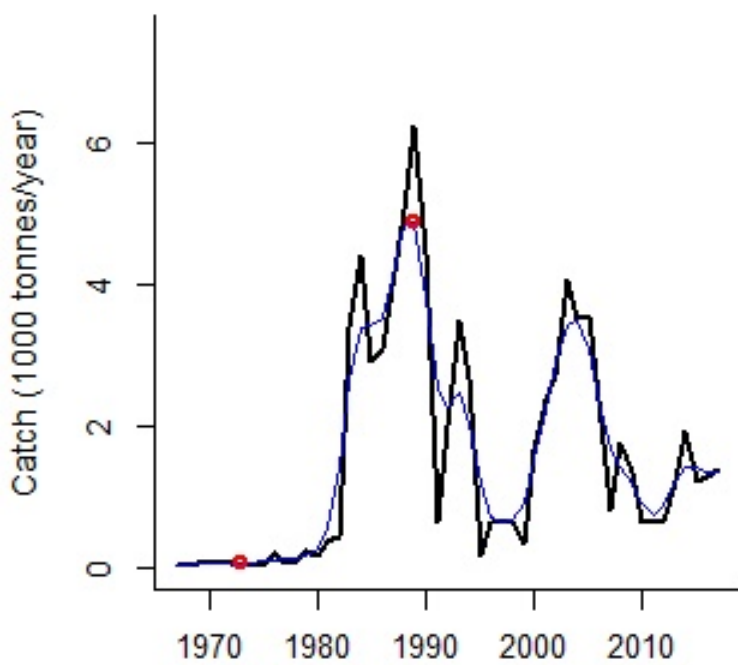

**B: Finding viable r-k**

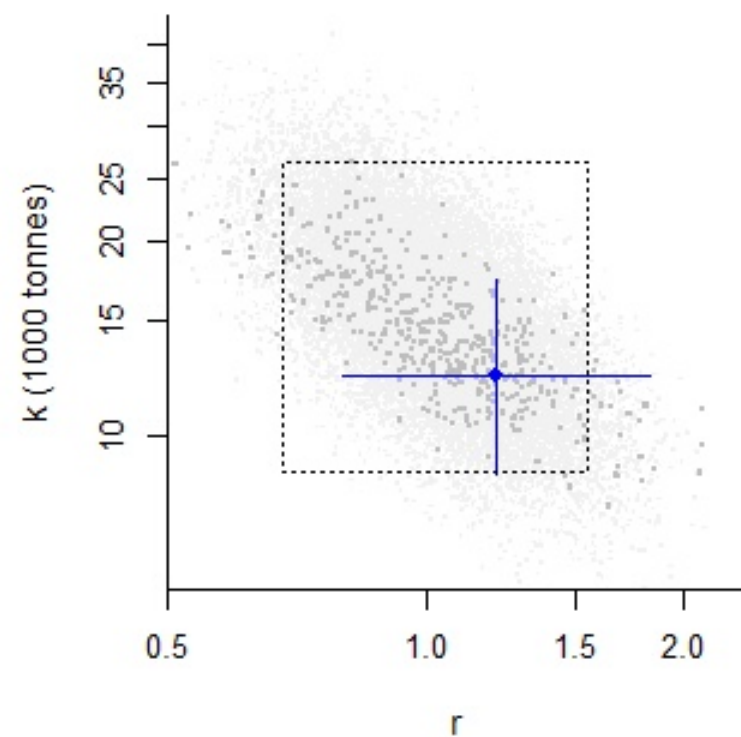

**C: Analysis of viable r-k**

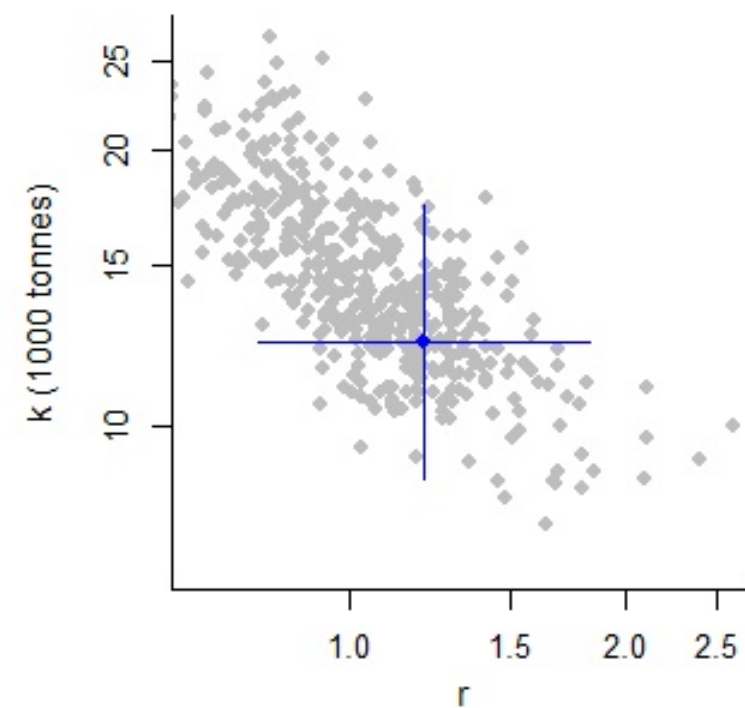

**D: Stock size**

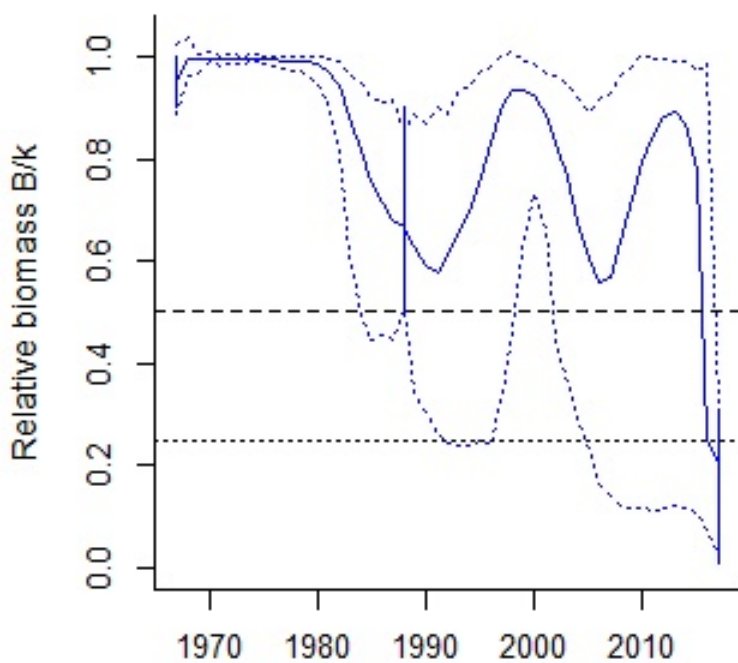

**E: Exploitation rate**

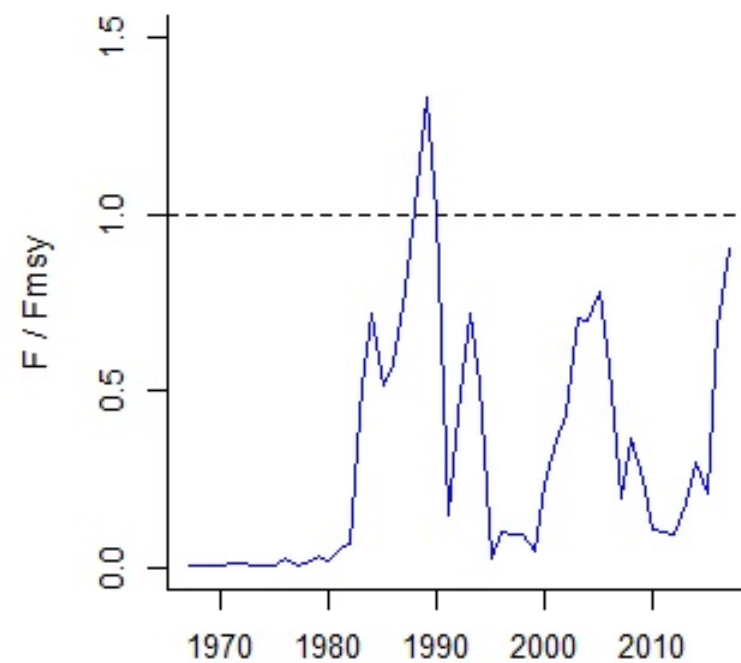

**F: Equilibrium curve**

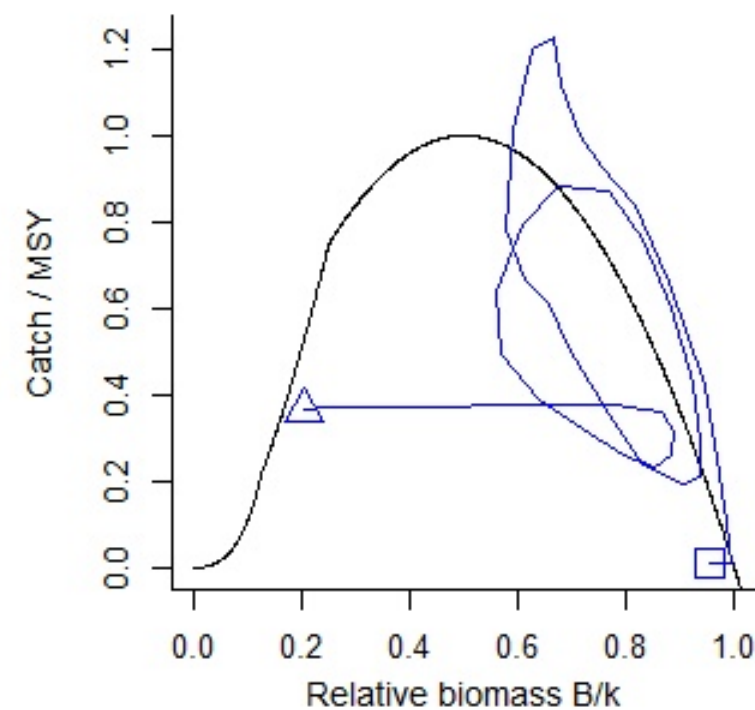



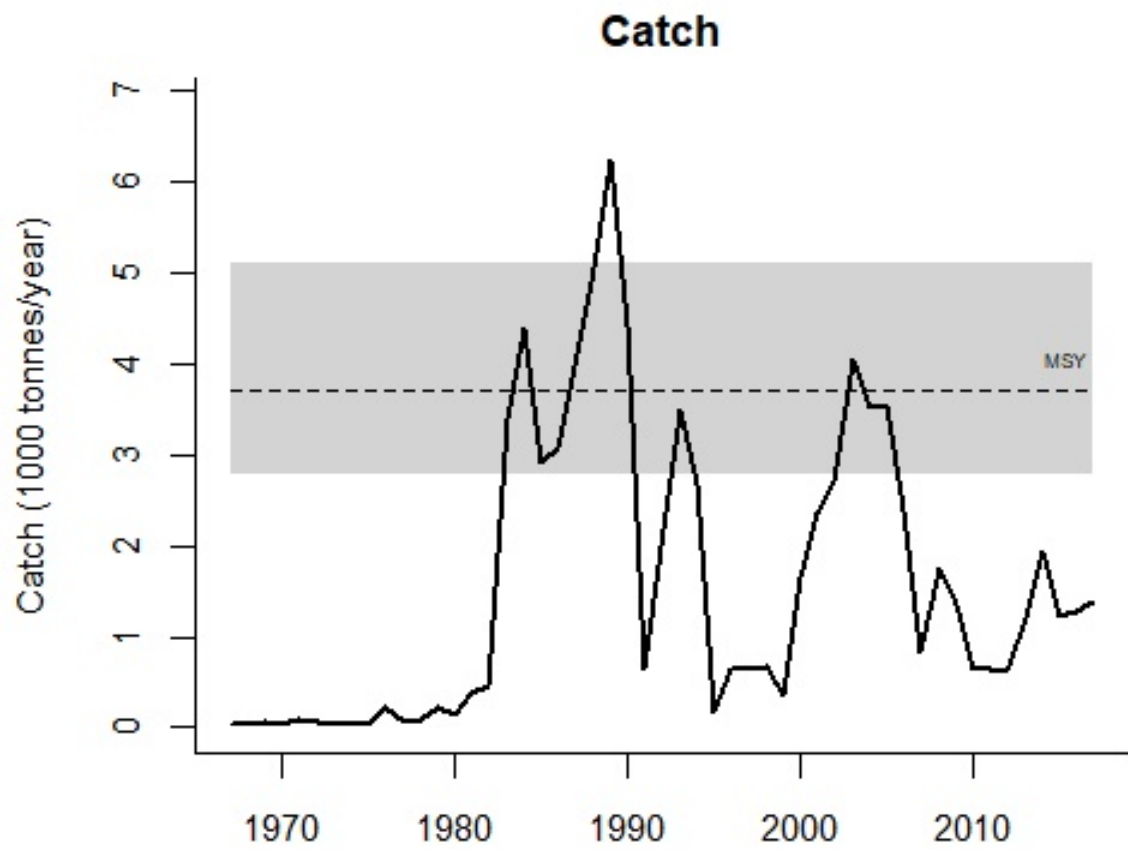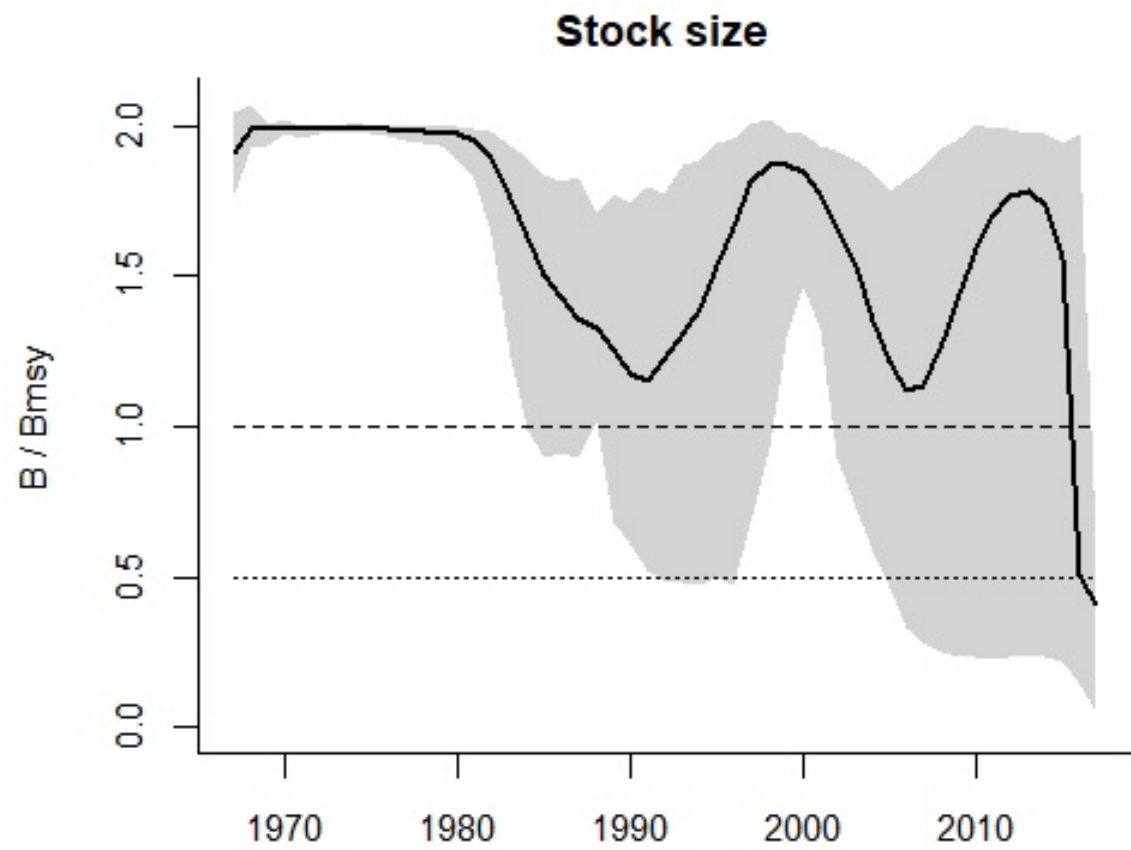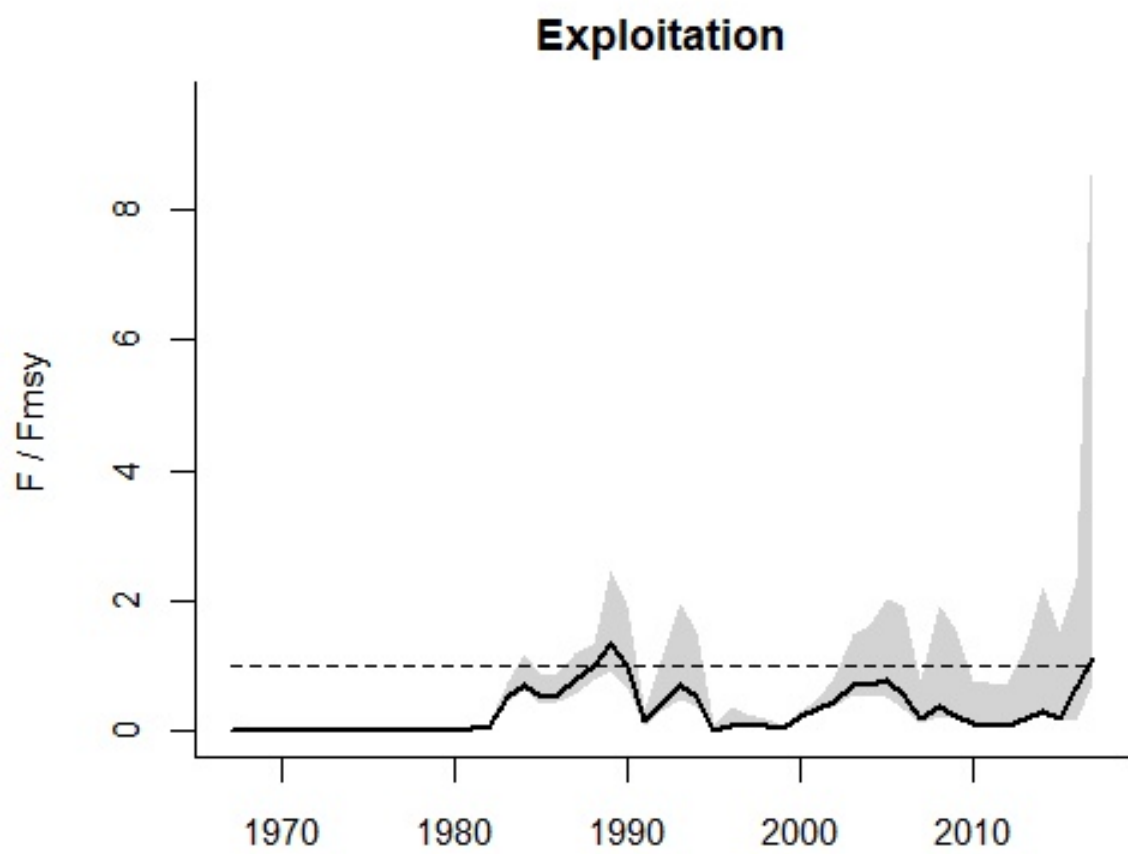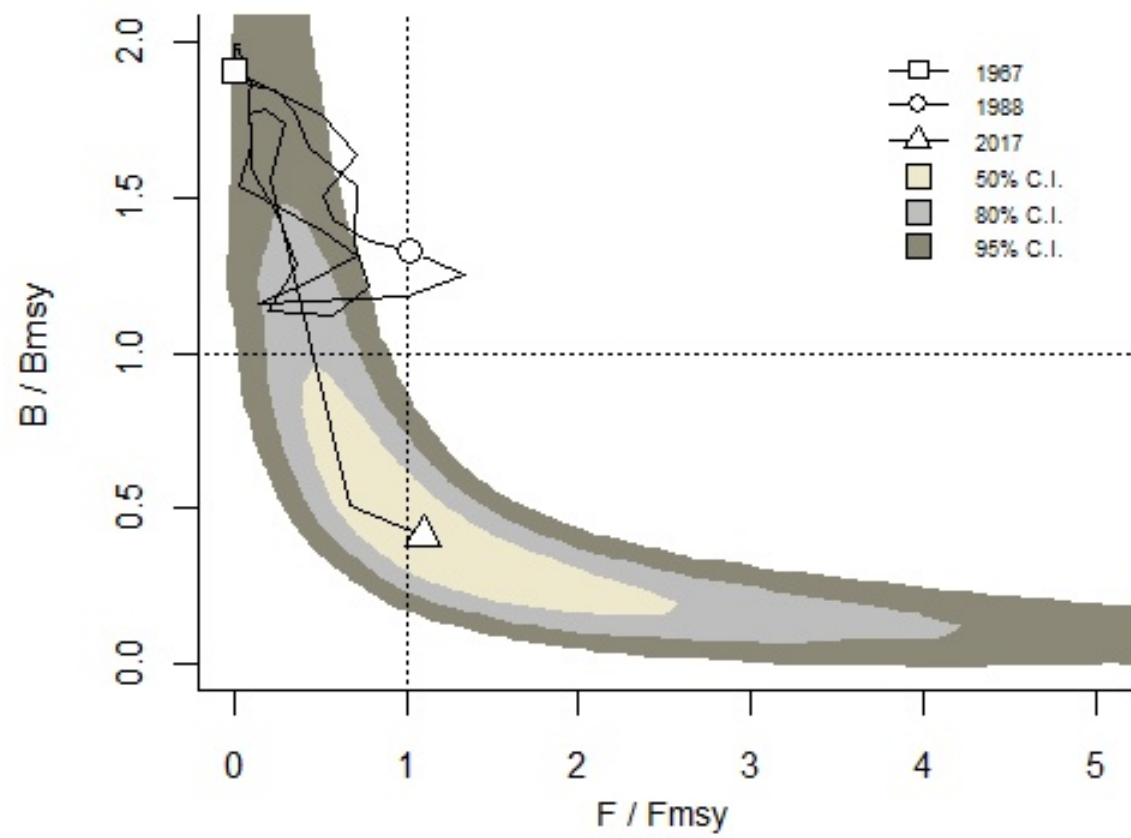

Supplement: Supplementary file 1 [file 21787845]
